# Supplementary material for: G9a regulates temporal preimplantation developmental program and lineage segregation in blastocyst
Source: eLife journal article supplement (doi:10.7554/elife.33361), 2018-05-10
Supplement: supp [file elife-33361-supp-v1.zip]

Archive with 10 entries (10 files):
- elife_poa_e33361_Figure_3_source_data_2.xlsx
- elife_poa_e33361_Figure_1_figure_supplement_1.pdf
- elife_poa_e33361_Figure_3_figure_supplement_2.pdf
- elife_poa_e33361_Figure_3_figure_supplement_3.pdf
- elife_poa_e33361_Figure_3_source_data_1.xlsx
- elife_poa_e33361_Figure_1_figure_supplement_2.pdf
- elife_poa_e33361_Figure_3_figure_supplement_1.pdf
- elife_poa_e33361_Figure_3_source_data_3.xlsx
- elife_poa_e33361_Transparent_Reporting_File.pdf
- elife_poa_e33361_Figure_2_figure_supplement_1.pdf
