# Supplementary material for: G9a regulates temporal preimplantation developmental program and lineage segregation in blastocyst
Source: eLife journal article supplement (doi:10.7554/elife.33361), 2018-05-10
Supplement: supp [file elife-33361-supp-v1.zip › elife_poa_e33361_Figure_2_figure_supplement_1.pdf]

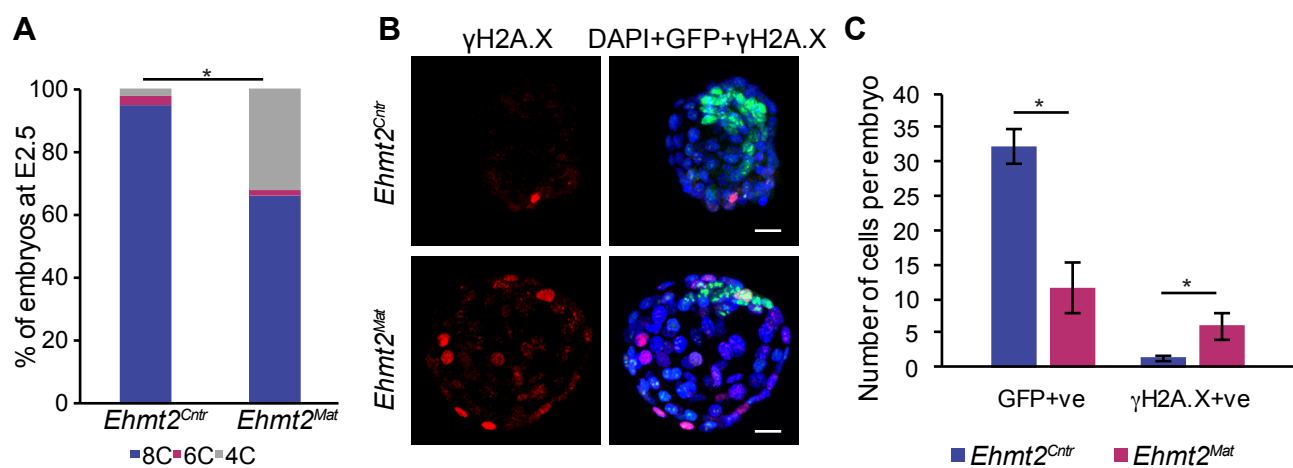

**Figure 2–Figure Supplement 1. Loss of maternal G9a results in developmental delay and increased  $\gamma$ H2A.X staining with fewer ICM cells.**
