# Supplementary material for: G9a regulates temporal preimplantation developmental program and lineage segregation in blastocyst
Source: eLife journal article supplement (doi:10.7554/elife.33361), 2018-05-10
Supplement: supp [file elife-33361-supp-v1.zip › elife_poa_e33361_Figure_3_source_data_1.xlsx]

## Sheet: Sheet1
Figure 3-source data 1. List of all single-embryo RNAseq samples sequenced. Shown are numbers of uniquely mapped reads as well as the genotype of each embryo.
SampleName	Unique mapped reads	genotype (zyg)	genotype (mat)
G9a.cntr.1	9479732	+/-	+
G9a.cntr.2	10176915	+/+	+
G9a.cntr.3	9119194	+/-	+
G9a.cntr.4	10542152	+/+	+
G9a.cntr.5	6776230	+/+	+
G9a.cntr.6	10647694	+/+	+
G9a.cntr.7	7703936	+/+	+
G9a.cntr.8	122646338	+/+	+
G9a.cntr.9	9500862	+/+	+
G9a.cntr.10	13377532	+/-	+
G9a.mut.1	7360827	-/-	-
G9a.mut.2	10345539	+/-	-
G9a.mut.3	5947899	+/-	-
G9a.mut.4	14861570	-/-	-
G9a.mut.5	7906578	-/-	-
G9a.mut.6	8592671	+/-	-
G9a.mut.7	10522399	-/-	-
G9a.mut.8	11792153	+/-	-
G9a.mut.9	9125624	-/-	-
G9a.mut.10	7190661	+/-	-
