# Supplementary material for: G9a regulates temporal preimplantation developmental program and lineage segregation in blastocyst
Source: eLife journal article supplement (doi:10.7554/elife.33361), 2018-05-10
Supplement: supp [file elife-33361-supp-v1.zip › elife_poa_e33361_Figure_3_source_data_2.xlsx]

## Sheet: Sheet1
	Figure 3-source data 2. List of differentially expressed genes between Ehmt2Cntr and Ehmt2Mat at 8C stage embryos. Differentially expressed genes were identified using DEseq2 with adjusted p-value<0.05.
Probe	Chromosome	Start	End	Strand	FDR	Feature	ID	Description	Type	Orientation	Distance	G9a.mut.3.bam	G9a.mut.10.bam	G9a.mut.9.bam	G9a.mut.8.bam	G9a.mut.2.bam	G9a.mut.4.bam	G9a.mut.1.bam	G9a.mut.5.bam	G9a.mut.7.bam	G9a.mut.6.bam	G9a.ctr.5.bam	G9a.ctr.2.bam	G9a.ctr.3.bam	G9a.ctr.4.bam	G9a.ctr.1.bam	G9a.ctr.6.bam	G9a.ctr.7.bam	G9a.ctr.9.bam	G9a.ctr.10.bam	G9a.ctr.8.bam
Sfpi1	2	91082390	91115756	+	1.62471e-06	Sfpi1	ENSMUSG00000002111	SFFV proviral integration 1 [Source:MGI Symbol;Acc:MGI:98282]	gene	overlapping	0	0.757042	-2.34227	-2.78278	-1.04761	-3.0829	-3.96069	-1.38566	-2.56937	-3.3126	-1.27847	4.31145	3.67421	3.72463	5.30633	5.17467	2.07057	4.0843	-0.741805	-0.0346709	1.73815
Smagp	15	100621342	100636865	-	7.25205e-09	Smagp	ENSMUSG00000053559	small cell adhesion glycoprotein [Source:MGI Symbol;Acc:MGI:2448476]	gene	overlapping	0	-2.20232	-2.34227	-2.78278	-3.36954	-3.0829	0.278771	-2.53766	-2.56937	-3.3126	-0.278472	2.02022	3.85545	4.84519	3.44179	4.34566	1.8361	4.69982	2.36253	2.51282	3.09661
Akr1b8	6	34354119	34368463	+	0.000199487	Akr1b8	ENSMUSG00000029762	aldo-keto reductase family 1, member B8 [Source:MGI Symbol;Acc:MGI:107673]	gene	overlapping	0	-2.05031	-2.34227	-2.78278	0.878386	2.85046	2.21368	-2.38566	1.97495	-3.3126	1.45849	3.32688	4.04308	-0.2362	4.07143	4.30259	6.4193	7.29483	2.81891	4.05279	4.83213
Taf6l	19	8774354	8786417	-	3.85404e-07	Taf6l	ENSMUSG00000003680	TAF6-like RNA polymerase II, p300/CBP-associated factor (PCAF)-associated factor [Source:MGI Symbol;Acc:MGI:2444957]	gene	overlapping	0	3.11961	1.46509	0.954189	2.3309	0.528534	0.835165	1.42169	-0.41737	-3.16059	-0.278472	4.85975	5.7162	5.18526	5.81191	7.1913	5.79849	5.26448	1.45983	-0.413182	2.58203
Hist1h2an	13	21786826	21787218	-	3.26488e-07	Hist1h2an	ENSMUSG00000069309	histone cluster 1, H2an [Source:MGI Symbol;Acc:MGI:2448300]	gene	overlapping	0	-0.46535	-0.757306	-1.63077	-1.36954	-0.608969	-1.00134	0.614339	0.167592	-3.16059	-0.278472	4.69115	4.76235	3.91064	4.0802	3.75645	-0.929432	1.63804	0.258195	-0.413182	1.73815
Hist1h2ak	13	21753395	21753907	-	8.37984e-05	Hist1h2ak	ENSMUSG00000063021	histone cluster 1, H2ak [Source:MGI Symbol;Acc:MGI:2448297]	gene	overlapping	0	-1.05031	-2.49427	-2.78278	-2.36954	-1.9309	-1.00134	-0.0637326	-0.832408	-1.16059	-0.541506	3.85975	4.16126	3.10619	3.75827	3.02373	-1.25136	1.40358	-3.21574	-0.735111	1.2601
Ltb	17	35194439	35196320	+	3.16294e-09	Ltb	ENSMUSG00000024399	lymphotoxin B [Source:MGI Symbol;Acc:MGI:104796]	gene	overlapping	0	-2.20232	0.242694	2.12411	0.215421	-1.34594	0.835165	-0.0637326	-2.56937	0.746296	-0.0560797	3.94222	5.51208	5.23257	5.37209	3.65051	4.1749	3.3822	2.60869	1.17178	3.46398
Hist1h2ag	13	22042479	22042949	-	2.1835e-07	Hist1h2ag	ENSMUSG00000069301	histone cluster 1, H2ag [Source:MGI Symbol;Acc:MGI:2448293]	gene	overlapping	0	1.11961	-0.757306	-2.78278	0.330898	-0.123542	-0.223729	0.421694	0.167592	-0.160595	0.837005	5.26414	5.37203	4.62887	4.62076	4.43611	0.996567	2.22301	1.25819	-0.413182	2.38349
Pbx3	2	34171457	34373140	-	3.98667e-10	Pbx3	ENSMUSG00000038718	pre B cell leukemia homeobox 3 [Source:MGI Symbol;Acc:MGI:97496]	gene	overlapping	0	-2.20232	-1.34227	0.176581	1.38535	-0.608969	2.79122	0.421694	0.904558	2.33126	0.721528	4.83838	4.5864	5.65688	5.68829	5.34566	4.44213	5.11702	5.37089	1.96533	4.18067
Zdhhc9	X	48171969	48208878	-	7.55076e-06	Zdhhc9	ENSMUSG00000036985	zinc finger, DHHC domain containing 9 [Source:MGI Symbol;Acc:MGI:2444393]	gene	overlapping	0	2.70458	-2.49427	-0.0458109	-1.78458	1.97599	2.90555	0.614339	1.67009	-3.3126	0.136565	5.97686	4.24777	5.93944	4.0085	6.10869	5.83079	5.48102	2.36253	3.54101	2.31073
Slmo1	18	67464849	67480581	+	0.0135767	Slmo1	ENSMUSG00000024530	slowmo homolog 1 (Drosophila) [Source:MGI Symbol;Acc:MGI:2442865]	gene	overlapping	0	-2.20232	-2.49427	-1.63077	-2.36954	0.391031	-2.80869	-2.53766	-2.56937	-0.575632	-2.86343	-2.37971	2.46689	-1.04356	-2.28613	1.25819	1.3336	3.54493	-3.21574	3.47434	3.72887
Hist1h2af	13	23533906	23534304	+	2.08909e-06	Hist1h2af	ENSMUSG00000061991	histone cluster 1, H2af [Source:MGI Symbol;Acc:MGI:2448309]	gene	overlapping	0	0.53465	-0.342269	-2.78278	-1.36954	-1.9309	0.191309	-0.800698	-0.0954419	-0.838667	-0.541506	4.18168	4.55589	3.6003	4.13173	3.66419	0.555995	1.83968	0.106192	-1.15015	1.2601
Hist1h2ah	13	22035113	22035643	-	3.18622e-06	Hist1h2ah	ENSMUSG00000069302	histone cluster 1, H2ah [Source:MGI Symbol;Acc:MGI:2448295]	gene	overlapping	0	1.11961	-2.34227	-2.78278	0.0898901	-1.9309	0.278771	-0.385661	0.752555	-0.160595	0.136565	4.85975	4.99841	4.10619	4.30633	3.95863	0.555995	1.95997	0.743622	-0.413182	2.15319
Gm7008	12	40222758	40229184	+	0.00308697	Gm7008	ENSMUSG00000035983	predicted gene 7008 [Source:MGI Symbol;Acc:MGI:3647211]	gene	overlapping	0	-2.20232	-2.49427	-0.630773	-3.36954	-1.34594	-3.80869	-2.53766	-2.41737	-3.3126	-2.86343	1.77229	-0.31447	1.04391	3.52123	2.81891	0.208072	1.22301	-3.21574	-2.73511	-2.54725
Hist1h2ai	13	21716412	21717452	+	3.70558e-07	Hist1h2ai	ENSMUSG00000071516	histone cluster 1, H2ai [Source:MGI Symbol;Acc:MGI:2448457]	gene	overlapping	0	0.53465	-1.34227	-1.04581	-0.199617	-1.34594	-0.223729	0.614339	0.389985	-0.838667	0.837005	4.59247	5.00294	4.05448	4.22957	3.95863	-0.0814351	2.12347	0.743622	-0.275679	2.15319
Unc93a	17	13108617	13131791	-	0.045268	Unc93a	ENSMUSG00000067049	unc-93 homolog A (C. elegans) [Source:MGI Symbol;Acc:MGI:1933250]	gene	overlapping	0	-2.20232	-0.757306	-2.78278	-3.52155	-0.930898	-0.108252	0.199302	-2.56937	-3.16059	-3.01544	-2.37971	-1.72951	-3.04356	4.01766	4.07582	2.24049	-2.83589	2.14572	1.55029	1.49714
Clip2	5	134489386	134552434	-	0.000150219	Clip2	ENSMUSG00000063146	CAP-GLY domain containing linker protein 2 [Source:MGI Symbol;Acc:MGI:1313136]	gene	overlapping	0	-2.05031	-2.49427	1.06967	-1.78458	-3.0829	-2.22373	-0.800698	-2.56937	-3.16059	-1.27847	2.16461	2.93346	3.00084	2.44179	0.106192	2.67938	0.638043	4.07582	-1.41318	-0.739895
Hist1h2ao	13	21810465	21810944	+	7.88488e-08	Hist1h2ao	ENSMUSG00000094248	histone cluster 1, H2ao [Source:MGI Symbol;Acc:MGI:2448302]	gene	overlapping	0	0.757042	-0.757306	-0.308845	1.02278	0.528534	1.0982	1.1993	1.67009	0.424368	1.45849	5.47273	5.71895	4.89308	5.08891	4.87291	0.655531	2.60152	1.93627	0.908746	2.89569
Got1l1	8	27197460	27202547	-	0.00129291	Got1l1	ENSMUSG00000039720	glutamic-oxaloacetic transaminase 1-like 1 [Source:MGI Symbol;Acc:MGI:1923865]	gene	overlapping	0	-2.20232	-2.49427	-1.63077	-2.36954	-0.608969	1.65074	3.0406	-0.832408	-3.3126	3.01921	1.57965	1.54351	4.88718	4.93788	4.80045	5.8361	5.63804	3.96969	2.43481	4.8103
Hist1h2ap	13	21833057	21833575	-	9.55053e-08	Hist1h2ap	ENSMUSG00000094777	histone cluster 1, H2ap [Source:MGI Symbol;Acc:MGI:3710573]	gene	overlapping	0	1.27162	0.242694	-0.0458109	0.717921	0.391031	0.835165	1.61434	1.38998	0.161333	1.66013	5.70893	5.74623	4.96207	5.07143	4.84316	0.44908	2.8707	1.32858	0.849852	3.19422
Hist1h2ac	13	23681467	23683948	-	7.65991e-07	Hist1h2ac	ENSMUSG00000069270	histone cluster 1, H2ac [Source:MGI Symbol;Acc:MGI:2448287]	gene	overlapping	0	0.271616	0.657731	-1.63077	-0.0476135	-1.34594	0.361234	1.07377	0.58263	0.298837	1.13657	5.06691	5.04747	4.34015	4.56562	4.285	0.208072	1.63804	0.936267	0.657207	2.18067
Tsga8	X	83486678	83487924	-	0.0373756	Tsga8	ENSMUSG00000035522	testis specific gene A8 [Source:MGI Symbol;Acc:MGI:1194903]	gene	overlapping	0	-2.20232	-2.49427	2.92382	-0.784579	-3.0829	2.2357	1.7018	-1.41737	-3.16059	-3.01544	5.2399	5.72992	-0.721627	3.42812	4.89046	-3.40336	0.316115	3.52123	4.2817	3.08211
Prcc	3	87858900	87885608	-	0.00176812	Prcc	ENSMUSG00000004895	papillary renal cell carcinoma (translocation-associated) [Source:MGI Symbol;Acc:MGI:2137738]	gene	overlapping	0	2.53465	1.74519	-1.63077	3.7494	4.90199	3.91241	4.56854	-2.41737	-1.57563	-0.278472	7.13861	7.06057	7.08573	6.39511	7.10744	5.59413	5.28766	6.38954	-1.41318	6.84828
Hist1h2ae	13	23570517	23571220	-	6.61163e-06	Hist1h2ae	ENSMUSG00000069272	histone cluster 1, H2ae [Source:MGI Symbol;Acc:MGI:2448290]	gene	overlapping	0	1.27162	-1.34227	-1.63077	-0.784579	-0.345935	-0.0013365	0.199302	1.04206	-1.16059	0.30649	4.40165	4.70234	3.87531	4.0626	3.70445	-0.25136	1.31611	0.395698	0.512817	1.62267
Amn	12	111271111	111276426	+	0.000946715	Amn	ENSMUSG00000021278	amnionless [Source:MGI Symbol;Acc:MGI:1934943]	gene	overlapping	0	-2.20232	1.56462	-0.0458109	0.330898	1.15657	0.65074	-2.53766	1.28307	1.23172	2.78042	-2.37971	4.33658	5.63593	5.37565	5.412	3.58153	4.03036	3.83108	2.65721	-1.22532
Grtp1	8	13176869	13200624	-	1.3147e-05	Grtp1	ENSMUSG00000038515	GH regulated TBC protein 1 [Source:MGI Symbol;Acc:MGI:1914040]	gene	overlapping	0	-2.20232	2.46509	-2.78278	1.80038	1.87646	1.47671	1.07377	3.46527	3.28235	4.30649	4.32688	4.62804	5.84214	6.53246	3.10619	6.69555	6.76939	5.07582	4.59581	6.45697
AA467197	2	122636986	122641191	+	1.47112e-05	AA467197	ENSMUSG00000033213	expressed sequence AA467197 [Source:MGI Symbol;Acc:MGI:3034182]	gene	overlapping	0	-2.05031	-2.49427	-2.78278	0.437813	1.71296	2.1455	1.52123	0.904558	1.29884	2.13657	5.32688	5.07355	4.65688	1.62076	3.10619	2.58153	4.45567	4.11618	5.09778	2.84507
Hist1h2ad	13	23574381	23574952	+	1.59048e-05	Hist1h2ad	ENSMUSG00000071478	histone cluster 1, H2ad [Source:MGI Symbol;Acc:MGI:2448289]	gene	overlapping	0	1.94969	0.465086	-1.63077	0.437813	-0.123542	-0.808691	-0.0637326	1.28307	-0.838667	-0.541506	4.67918	5.00746	3.97881	4.28373	4.09614	0.070568	1.22301	0.936267	0.0722443	2.00734
Aqp3	4	41092722	41098183	-	3.95253e-05	Aqp3	ENSMUSG00000028435	aquaporin 3 [Source:MGI Symbol;Acc:MGI:1333777]	gene	overlapping	0	-2.20232	-0.757306	-2.78278	1.38535	2.31703	-1.80869	2.42169	-0.41737	-0.35324	2.04346	3.57965	2.85545	3.54141	3.91355	3.98066	5.01543	2.31611	3.31131	4.18375	5.55341
Atp8b4	2	126320973	126500674	-	0.0344545	Atp8b4	ENSMUSG00000060131	ATPase, class I, type 8B, member 4 [Source:MGI Symbol;Acc:MGI:1859664]	gene	overlapping	0	-2.20232	-2.49427	-2.78278	1.43781	1.76954	0.439236	-2.53766	1.28307	2.7463	1.72153	4.73808	2.38597	0.863335	-3.43813	1.02373	5.70284	6.05421	2.3957	2.67428	3.8706
As3mt	19	46707443	46741095	+	0.0482771	As3mt	ENSMUSG00000003559	arsenic (+3 oxidation state) methyltransferase [Source:MGI Symbol;Acc:MGI:1929882]	gene	overlapping	0	-2.05031	1.35817	-2.78278	-3.36954	2.31703	1.7459	3.2582	-2.56937	2.51183	1.78042	3.35725	4.36501	4.67754	-3.43813	-3.21574	5.68233	6.74238	2.02373	-0.0346709	5.48066
Zfp174	16	3847268	3858880	+	0.037594	Zfp174	ENSMUSG00000054939	zinc finger protein 174 [Source:MGI Symbol;Acc:MGI:2686600]	gene	overlapping	0	-2.05031	-2.49427	-0.308845	-2.36954	-1.9309	-3.80869	-2.53766	-0.41737	-0.575632	-1.27847	-2.22771	-1.72951	-1.45859	-0.701163	-3.21574	2.99657	3.54493	-3.06373	-3.73511	3.45275
Slc9a3r2	17	24639282	24650305	-	0.0055712	Slc9a3r2	ENSMUSG00000002504	solute carrier family 9 (sodium/hydrogen exchanger), member 3 regulator 2 [Source:MGI Symbol;Acc:MGI:1890662]	gene	overlapping	0	-2.20232	-2.49427	-0.308845	-3.52155	1.31703	1.89175	0.936267	0.58263	0.424368	-1.86343	2.41615	-3.46647	3.41588	4.50829	4.16509	1.3336	4.09748	0.936267	4.37863	3.11096
Sdk2	11	113776374	114067046	-	0.0445413	Sdk2	ENSMUSG00000041592	sidekick homolog 2 (chicken) [Source:MGI Symbol;Acc:MGI:2443847]	gene	overlapping	0	-2.20232	-0.342269	-1.04581	0.330898	-3.0829	0.835165	-2.53766	0.58263	-3.3126	2.13657	-2.37971	-0.729508	2.7638	-0.116201	-0.063733	4.42812	5.06431	1.89046	1.65721	3.8103
Cat	2	103453849	103485160	-	0.014409	Cat	ENSMUSG00000027187	catalase [Source:MGI Symbol;Acc:MGI:88271]	gene	overlapping	0	0.53465	2.46509	-2.78278	-3.52155	2.85046	0.0981992	3.1993	-2.41737	-3.3126	0.721528	-2.22771	3.94292	3.38271	3.15682	3.42812	5.70574	6.25569	2.02373	3.39417	4.19422
Trp53i13	11	77508099	77515980	-	0.00328377	Trp53i13	ENSMUSG00000044328	transformation related protein 53 inducible protein 13 [Source:MGI Symbol;Acc:MGI:1915125]	gene	overlapping	0	-2.20232	0.657731	-0.0458109	0.630459	-1.9309	-3.96069	-0.800698	-2.56937	-0.160595	0.837005	3.02022	2.85545	-0.0435551	3.18961	3.93627	3.1749	2.67367	2.06555	-3.73511	-0.0878187
Hist1h2ab	13	23751088	23751593	+	7.55874e-05	Hist1h2ab	ENSMUSG00000061615	histone cluster 1, H2ab [Source:MGI Symbol;Acc:MGI:2448306]	gene	overlapping	0	2.11961	-1.34227	-0.308845	-1.04761	-0.123542	-0.0013365	1.1993	0.58263	-0.160595	-0.0560797	4.41615	4.64553	3.98987	4.0358	3.69115	-0.0814351	1.40358	0.395698	0.17178	2.03771
Gm15444	3	96209627	96220168	-	0.00728517	Gm15444	ENSMUSG00000086556	predicted gene 15444 [Source:MGI Symbol;Acc:MGI:3705796]	gene	overlapping	0	-2.20232	-2.49427	-2.78278	-3.52155	-3.0829	-2.80869	-2.53766	-2.56937	-3.3126	-2.86343	1.23172	1.63973	0.278373	0.801337	0.258195	-2.25136	-0.683885	-3.06373	-3.73511	-2.54725
Hist2h2ab	3	96219865	96220308	+	0.00728517	Hist2h2ab	ENSMUSG00000063689	histone cluster 2, H2ab [Source:MGI Symbol;Acc:MGI:2448314]	gene	overlapping	0	-2.20232	-2.49427	-2.78278	-3.52155	-3.0829	-2.80869	-2.53766	-2.56937	-3.3126	-2.86343	1.23172	1.63973	0.278373	0.801337	0.258195	-2.25136	-0.683885	-3.06373	-3.73511	-2.54725
Fam83d	2	158768093	158786637	+	1.68365e-07	Fam83d	ENSMUSG00000027654	family with sequence similarity 83, member D [Source:MGI Symbol;Acc:MGI:1919128]	gene	overlapping	0	3.59354	-0.757306	2.06967	2.85928	3.47849	1.54886	0.421694	-0.41737	2.51183	2.30649	2.47273	5.13261	5.54516	5.11902	5.26718	6.05925	5.79589	5.23089	4.44976	4.90396
Scaper	9	55549883	55919605	-	0.0302783	Scaper	ENSMUSG00000034007	S phase cyclin A-associated protein in the ER [Source:MGI Symbol;Acc:MGI:1925976]	gene	overlapping	0	-2.20232	1.35817	-2.78278	2.58465	0.769542	0.278771	-0.800698	2.38998	3.62077	-3.01544	4.03908	5.92393	5.5785	4.41431	2.02373	4.71442	3.12347	-3.21574	2.81948	3.64257
Slc5a10	11	61672781	61720826	-	0.00036196	Slc5a10	ENSMUSG00000042371	solute carrier family 5 (sodium/glucose cotransporter), member 10 [Source:MGI Symbol;Acc:MGI:1926089]	gene	overlapping	0	-2.20232	-0.0203406	-2.63077	1.43781	-0.345935	-3.96069	-0.800698	-0.41737	0.424368	1.22403	2.63027	0.59242	3.1659	1.92333	2.66419	2.50353	4.11053	2.58012	1.30928	2.49714
Zfp385a	15	103313895	103340086	-	0.000806024	Zfp385a	ENSMUSG00000000552	zinc finger protein 385A [Source:MGI Symbol;Acc:MGI:1352495]	gene	overlapping	0	-2.20232	1.11716	-2.78278	0.537349	1.15657	0.946196	1.1993	-0.41737	-0.160595	1.94392	2.41615	-3.31447	4.36584	3.15682	3.90205	2.53	4.4454	3.42812	2.14753	3.19422
Camk2n2	16	20619215	20621287	-	0.0213137	Camk2n2	ENSMUSG00000051146	calcium/calmodulin-dependent protein kinase II inhibitor 2 [Source:MGI Symbol;Acc:MGI:1920297]	gene	overlapping	0	-2.20232	1.35817	-2.78278	-3.52155	-0.608969	0.439236	-0.385661	-0.832408	-1.57563	0.458494	2.98174	-0.729508	3.4483	3.9037	1.79425	-0.666398	2.93082	-3.21574	1.30928	1.49714
ORF61	10	79974948	79984330	-	9.46972e-07	ORF61	ENSMUSG00000013858	open reading frame 61 [Source:MGI Symbol;Acc:MGI:2177957]	gene	overlapping	0	3.30724	2.18129	5.27612	1.95239	2.76954	3.2574	2.42169	4.18254	2.19696	1.94392	6.62716	6.48805	6.70631	6.55622	7.06812	5.70284	6.0876	3.45983	3.08507	3.61262
Loxhd1	18	77281958	77442341	+	0.0420151	Loxhd1	ENSMUSG00000032818	lipoxygenase homology domains 1 [Source:MGI Symbol;Acc:MGI:1914609]	gene	overlapping	0	-2.20232	-2.34227	1.61715	-0.562187	-1.34594	0.191309	1.42169	-0.41737	-3.3126	-1.27847	-2.37971	3.32939	-1.45859	3.65639	2.89046	4.2722	1.70843	0.936267	-3.88711	2.47512
Gm1110	9	26879567	26923081	-	0.0135971	Gm1110	ENSMUSG00000079644	predicted gene 1110 [Source:MGI Symbol;Acc:MGI:2685956]	gene	overlapping	0	-2.05031	2.78701	-2.78278	-1.78458	-3.0829	0.891748	2.07377	4.44061	-0.160595	2.78042	3.26414	5.29286	2.34876	6.63423	5.80663	3.44908	3.149	0.521229	3.84232	4.70542
Rnd3	2	51130438	51149111	-	5.18237e-05	Rnd3	ENSMUSG00000017144	Rho family GTPase 3 [Source:MGI Symbol;Acc:MGI:1921444]	gene	overlapping	0	3.75704	4.31594	2.89279	2.67485	1.87646	1.99866	1.42169	2.44061	3.48326	2.49412	5.19014	3.80447	6.00357	3.9618	4.5137	6.27416	6.77555	-1.47877	4.32559	7.08756
Atp8a1	5	67618140	67847432	-	0.00258244	Atp8a1	ENSMUSG00000037685	ATPase, aminophospholipid transporter (APLT), class I, type 8A, member 1 [Source:MGI Symbol;Acc:MGI:1330848]	gene	overlapping	0	3.27162	2.61193	-2.78278	2.08989	0.769542	1.27877	2.00666	1.38998	3.48326	-0.541506	2.09422	4.67421	3.18526	5.42812	2.22167	4.619	6.61532	-1.06373	4.39932	5.01499
Hist2h2ac	3	96220361	96220880	-	0.0162422	Hist2h2ac	ENSMUSG00000068855	histone cluster 2, H2ac [Source:MGI Symbol;Acc:MGI:2448316]	gene	overlapping	0	-1.05031	-2.49427	-2.78278	-3.36954	-0.608969	-2.22373	-2.38566	-2.56937	-3.16059	-1.86343	1.67918	1.89498	0.863335	1.57186	0.936267	-1.25136	-1.68389	-3.21574	-0.735111	-1.54725
Camta1	4	150917322	151861876	-	0.0186265	Camta1	ENSMUSG00000014592	calmodulin binding transcription activator 1 [Source:MGI Symbol;Acc:MGI:2140230]	gene	overlapping	0	-0.0503126	2.78701	-2.78278	-3.36954	2.0233	-2.80869	-0.0637326	1.83056	-3.16059	0.595997	1.85975	-0.31447	5.12135	4.52766	3.34566	2.8361	-2.68389	3.85513	4.14753	-0.377325
Syde2	3	145987870	146021720	+	0.0273824	Syde2	ENSMUSG00000036863	synapse defective 1, Rho GTPase, homolog 2 (C. elegans) [Source:MGI Symbol;Acc:MGI:3036264]	gene	overlapping	0	-2.20232	2.18129	2.57868	0.717921	1.52853	-0.0013365	-0.0637326	-1.41737	-1.57563	1.78042	3.05769	1.85545	2.27837	0.713874	2.3957	1.55599	2.22301	5.86996	2.39417	5.04894
Zfp248	6	118427319	118455528	-	0.0264886	Zfp248	ENSMUSG00000030145	zinc finger protein 248 [Source:MGI Symbol;Acc:MGI:1919970]	gene	overlapping	0	-2.20232	0.465086	-2.63077	-1.04761	-1.34594	-0.808691	-2.38566	-1.41737	-3.3126	-0.0560797	-1.22771	-0.144545	-2.04356	0.883799	-2.06373	3.80392	2.12347	-3.06373	2.49371	0.0377122
Glipr2	4	43957401	43979118	+	0.0489769	Glipr2	ENSMUSG00000028480	GLI pathogenesis-related 2 [Source:MGI Symbol;Acc:MGI:1917770]	gene	overlapping	0	3.27162	-2.49427	-2.78278	-0.784579	0.0691026	0.439236	-2.53766	-2.56937	1.96869	1.94392	3.79466	-3.31447	3.68437	1.99928	4.14572	3.91857	3.4454	5.18893	2.39417	2.70068
Gm14305	2	176708328	176721813	+	0.0191954	Gm14305	ENSMUSG00000078878	predicted gene 14305 [Source:MGI Symbol;Acc:MGI:3709632]	gene	overlapping	0	-2.05031	-2.49427	-2.63077	-2.36954	-1.9309	-3.80869	-0.385661	-2.41737	-3.3126	-2.86343	-1.22771	0.772993	-3.19556	0.713874	-3.21574	0.918565	0.901077	0.395698	0.586818	1.40695
2410004A20Rik	9	73101836	73104443	+	2.19495e-05	2410004A20Rik	ENSMUSG00000092622	RIKEN cDNA 2410004A20 gene [Source:MGI Symbol;Acc:MGI:1914241]	gene	overlapping	0	3.47325	5.96607	0.539152	3.50082	1.0691	2.47671	2.1993	1.67009	3.48326	4.38449	5.7891	6.26861	6.68946	6.74867	6.7061	5.83079	7.23944	4.6016	4.24788	5.98023
Hhex	19	37432887	37440728	+	0.000426539	Hhex	ENSMUSG00000024986	hematopoietically expressed homeobox [Source:MGI Symbol;Acc:MGI:96086]	gene	overlapping	0	-2.20232	4.25764	3.09715	4.08167	3.95175	3.08613	1.42169	-2.41737	3.28235	3.15893	4.94222	4.85546	5.40766	6.29884	6.32644	5.91857	6.93266	3.81891	3.45471	5.02261
Perp	10	18845071	18857073	+	0.00482811	Perp	ENSMUSG00000019851	PERP, TP53 apoptosis effector [Source:MGI Symbol;Acc:MGI:1929938]	gene	overlapping	0	-2.05031	4.46509	-2.78278	3.53735	0.975993	1.71487	2.78426	3.71191	2.08733	2.04346	4.9522	2.20909	2.04391	5.11475	4.08601	6.52507	7.03036	1.98066	4.83474	4.83213
1700034H14Rik	18	84947294	84951524	-	0.0356189	1700034H14Rik	ENSMUSG00000024645	RIKEN cDNA 1700034H14 gene [Source:MGI Symbol;Acc:MGI:1920595]	gene	overlapping	0	1.11961	-0.342269	-2.78278	1.02278	1.92708	2.19131	-0.385661	3.19734	0.64676	1.94392	4.41615	2.00746	5.77662	4.3505	4.70445	-3.40336	-2.83589	4.40387	2.14753	2.86214
Fbxl15	19	46328184	46330446	+	1.42701e-11	Fbxl15	ENSMUSG00000025226	F-box and leucine-rich repeat protein 15 [Source:MGI Symbol;Acc:MGI:1915681]	gene	overlapping	0	2.47325	2.74519	4.27612	2.12231	1.23903	2.86373	2.89974	2.44061	2.83941	2.22403	5.21523	5.24777	5.1659	6.02449	6.31348	5.43514	4.97433	4.17467	3.63121	4.57687
Gjb3	4	127325235	127330844	-	0.0148443	Gjb3	ENSMUSG00000042367	gap junction protein, beta 3 [Source:MGI Symbol;Acc:MGI:95721]	gene	overlapping	0	-0.46535	5.71843	-1.63077	3.79033	0.239028	4.53116	4.05728	1.75255	5.44674	5.27612	6.23172	3.66281	2.81443	6.97008	5.24005	7.88883	8.10972	5.08601	6.84891	7.0693
Hist2h2aa2	3	96239785	96240323	-	0.00242669	Hist2h2aa2	ENSMUSG00000064220	histone cluster 2, H2aa2 [Source:MGI Symbol;Acc:MGI:2448283]	gene	overlapping	0	2.03715	-2.34227	-2.63077	-1.78458	0.0691026	-1.22373	-1.38566	-0.41737	-1.57563	-0.0560797	3.41615	3.49288	2.51103	2.84316	2.22167	0.208072	0.48604	-0.741805	1.35235	0.845067
Adcy3	12	4133103	4213525	+	0.000146326	Adcy3	ENSMUSG00000020654	adenylate cyclase 3 [Source:MGI Symbol;Acc:MGI:99675]	gene	overlapping	0	-1.05031	2.97966	-2.78278	0.952387	2.62369	3.62594	1.07377	2.28307	2.51183	2.09076	4.05769	5.11598	4.74435	3.10619	5.41605	3.05242	4.31611	5.05521	4.30381	4.87481
Epas1	17	86753907	86833410	+	4.52e-06	Epas1	ENSMUSG00000024140	endothelial PAS domain protein 1 [Source:MGI Symbol;Acc:MGI:109169]	gene	overlapping	0	2.40912	5.63501	3.39159	2.60774	4.26877	4.49052	4.64776	0.752555	6.29473	5.49851	7.33644	6.86544	6.92367	7.09974	6.4793	7.76545	7.84555	6.56744	6.23499	6.93354
Rac3	11	120721470	120723969	+	0.00806266	Rac3	ENSMUSG00000018012	RAS-related C3 botulinum substrate 3 [Source:MGI Symbol;Acc:MGI:2180784]	gene	overlapping	0	3.59354	-2.49427	1.17658	3.75974	2.0691	1.86373	-2.38566	1.38998	-3.3126	2.72153	4.09422	4.79927	2.6003	3.34323	3.69115	5.40328	5.69549	4.81891	4.05931	4.34149
H2afy	13	56073619	56136361	-	0.000155104	H2afy	ENSMUSG00000015937	H2A histone family, member Y [Source:MGI Symbol;Acc:MGI:1349392]	gene	overlapping	0	4.48885	-2.34227	0.691155	2.5612	2.92708	3.46743	4.00666	2.97495	2.23172	4.33624	5.71481	5.95933	5.5858	4.42123	5.24915	5.83079	7.20181	2.63671	4.72432	5.39526
Irak3	10	120141648	120202130	-	0.00279359	Irak3	ENSMUSG00000020227	interleukin-1 receptor-associated kinase 3 [Source:MGI Symbol;Acc:MGI:1921164]	gene	overlapping	0	2.342	-2.34227	-0.630773	2.78021	3.39103	3.2357	3.3957	1.04206	3.29884	2.18096	3.85975	1.49288	3.02253	5.04926	5.93627	5.79576	5.82787	1.79425	2.72432	5.98413
Fam83g	11	61684091	61709951	+	0.000155676	Fam83g	ENSMUSG00000042377	family with sequence similarity 83, member G [Source:MGI Symbol;Acc:MGI:1916890]	gene	overlapping	0	-2.20232	1.97966	0.828658	4.24517	2.68381	0.891748	2.56854	2.38998	3.85063	3.18096	4.41615	4.14496	4.7378	4.46207	6.44999	5.01543	6.1299	4.50612	4.15971	4.81469
Rnf126	10	79758515	79766952	-	2.48169e-14	Rnf126	ENSMUSG00000035890	ring finger protein 126 [Source:MGI Symbol;Acc:MGI:1917544]	gene	overlapping	0	4.09943	4.58847	5.19578	3.77001	2.79702	3.66704	3.89974	4.63791	4.55365	4.44035	7.17956	6.65851	7.11126	7.03242	6.89627	6.78893	6.88597	5.80045	4.08507	5.82344
Rcbtb2	14	73123037	73207843	+	0.00259543	Rcbtb2	ENSMUSG00000022106	regulator of chromosome condensation (RCC1) and BTB (POZ) domain containing protein 2 [Source:MGI Symbol;Acc:MGI:1917200]	gene	overlapping	0	0.949688	-2.49427	-0.0458109	1.02278	1.15657	1.43924	0.614339	1.83056	0.298837	1.04346	3.94222	3.35796	2.83909	3.7473	4.29382	-0.0814351	-2.68389	3.74362	3.26489	0.622675
Palld	8	61513246	61902690	-	0.0373162	Palld	ENSMUSG00000058056	palladin, cytoskeletal associated protein [Source:MGI Symbol;Acc:MGI:1919583]	gene	overlapping	0	-0.0503126	-2.49427	1.45669	-3.52155	1.15657	2.21368	0.199302	2.22649	-3.16059	0.837005	-2.37971	2.30024	1.41588	4.10619	2.81891	3.3336	3.79185	1.52123	1.01978	4.9645
Dap	15	31224385	31274338	+	0.00244235	Dap	ENSMUSG00000039168	death-associated protein [Source:MGI Symbol;Acc:MGI:1918190]	gene	overlapping	0	5.92697	-0.0203406	-1.63077	1.53735	3.71296	4.01786	3.49698	1.16759	4.96353	4.33624	5.49339	6.23049	5.64295	5.41778	5.25368	7.20294	7.68244	4.96417	6.19267	6.00734
Ubqln2	X	153498232	153501537	+	0.010356	Ubqln2	ENSMUSG00000050148	ubiquilin 2 [Source:MGI Symbol;Acc:MGI:1860283]	gene	overlapping	0	0.271616	-0.757306	2.72678	-1.04761	0.528534	0.278771	-0.800698	-0.0954419	-0.575632	-0.0560797	3.63027	2.63973	1.7638	3.9037	-3.21574	1.50353	0.775547	4.63671	0.788451	1.45275
Dennd1b	1	138963436	139176043	+	0.000368987	Dennd1b	ENSMUSG00000056268	DENN/MADD domain containing 1B [Source:MGI Symbol;Acc:MGI:2447812]	gene	overlapping	0	1.40912	1.24269	2.89279	3.46335	0.528534	-0.108252	3.95419	3.22649	0.298837	1.52888	5.06691	3.78356	1.41588	3.71387	2.55098	5.456	6.04743	3.91355	4.66149	5.49441
Cgref1	5	30933146	30945480	-	0.00971448	Cgref1	ENSMUSG00000029161	cell growth regulator with EF hand domain 1 [Source:MGI Symbol;Acc:MGI:1915817]	gene	overlapping	0	4.17851	-0.757306	2.22721	1.91586	0.876458	2.9462	1.52123	-0.832408	2.12481	2.45849	-2.37971	5.22469	2.4483	3.8224	1.3957	5.21216	5.39826	5.30259	4.11038	5.34149
Gsk3a	7	25228258	25237851	-	3.38998e-12	Gsk3a	ENSMUSG00000057177	glycogen synthase kinase 3 alpha [Source:MGI Symbol;Acc:MGI:2152453]	gene	overlapping	0	3.59354	4.21232	3.74427	3.15402	2.19839	3.06167	2.97189	3.67009	4.37856	4.18096	6.62091	6.43875	6.14627	6.32858	5.91068	5.69701	5.90108	5.05001	3.78845	5.22424
Gm14308	2	176613364	176636344	-	0.0424331	Gm14308	ENSMUSG00000078880	predicted gene 14308 [Source:MGI Symbol;Acc:MGI:3782921]	gene	overlapping	0	-2.20232	-2.49427	-2.63077	-2.36954	-1.9309	-1.48676	-0.0637326	-1.41737	-3.3126	-1.86343	0.579646	0.855455	-3.19556	-0.964198	-3.21574	0.333602	1.22301	1.10619	1.17178	1.31073
Yes1	5	32611171	32687066	+	0.0086131	Yes1	ENSMUSG00000014932	Yamaguchi sarcoma viral (v-yes) oncogene homolog 1 [Source:MGI Symbol;Acc:MGI:99147]	gene	overlapping	0	-2.05031	2.46509	0.691155	3.58465	0.654065	2.32059	3.42169	2.79208	2.29884	-2.86343	3.98174	3.39978	4.24185	4.56562	2.89046	1.2722	1.31611	6.63497	3.19563	5.24065
Gm20633	3	96243550	96246380	-	0.0065115	Gm20633	ENSMUSG00000093553	predicted gene 20633 [Source:MGI Symbol;Acc:MGI:5313080]	gene	overlapping	0	1.75704	-0.757306	0.828658	-3.36954	-0.930898	-0.638767	0.199302	-0.832408	-0.575632	-1.27847	3.47273	3.427	2.24185	2.73624	2.52123	0.655531	0.316115	-3.06373	1.30928	0.153189
Hist2h2aa1	3	96245538	96246115	+	0.0065115	Hist2h2aa1	ENSMUSG00000063954	histone cluster 2, H2aa1 [Source:MGI Symbol;Acc:MGI:96097]	gene	overlapping	0	1.75704	-0.757306	0.828658	-3.36954	-0.930898	-0.638767	0.199302	-0.832408	-0.575632	-1.27847	3.47273	3.427	2.24185	2.73624	2.52123	0.655531	0.316115	-3.06373	1.30928	0.153189
Ap3b2	7	81460399	81493925	-	0.0467938	Ap3b2	ENSMUSG00000062444	adaptor-related protein complex 3, beta 2 subunit [Source:MGI Symbol;Acc:MGI:1100869]	gene	overlapping	0	0.53465	-2.49427	-0.0458109	0.800383	1.59266	2.2574	2.89974	-2.56937	2.96869	3.54596	2.16461	4.98015	3.91064	2.69115	-3.21574	3.2878	5.64703	4.72417	4.7325	3.55078
Snx15	19	6119399	6128304	-	3.58991e-06	Snx15	ENSMUSG00000024787	sorting nexin 15 [Source:MGI Symbol;Acc:MGI:1916274]	gene	overlapping	0	2.94969	2.70213	3.41362	1.58465	3.66902	1.91923	3.98938	2.16759	-0.575632	3.87803	5.99629	5.35087	5.80819	5.53086	4.75005	2.81473	4.51579	5.44406	5.63993	3.87901
Bend4	5	67392147	67427799	-	0.0151437	Bend4	ENSMUSG00000092060	BEN domain containing 4 [Source:MGI Symbol;Acc:MGI:3648414]	gene	overlapping	0	-2.20232	2.35817	0.176581	0.537349	5.10253	3.39098	3.2582	-1.41737	3.00933	3.75128	2.57965	2.61627	3.91064	6.44519	6.47349	3.50353	5.0096	6.1913	4.95489	5.32311
Col5a3	9	20770050	20815067	-	0.048423	Col5a3	ENSMUSG00000004098	collagen, type V, alpha 3 [Source:MGI Symbol;Acc:MGI:1858212]	gene	overlapping	0	3.342	2.70213	-2.63077	2.60774	2.0233	4.08613	0.614339	-2.56937	-0.575632	3.596	-2.37971	4.90953	5.45629	4.91845	5.49469	5.30706	3.36051	0.936267	5.50806	4.20764
Ier2	8	84661331	84662852	-	0.000696633	Ier2	ENSMUSG00000053560	immediate early response 2 [Source:MGI Symbol;Acc:MGI:104815]	gene	overlapping	0	3.11961	3.63501	0.954189	0.717921	1.87646	0.191309	2.1379	-2.41737	1.16133	2.26585	3.41615	3.69676	4.5263	3.94269	2.69115	4.07956	6.13629	1.98066	3.28726	3.99191
Gm20632	3	96239393	96241819	+	0.000520297	Gm20632	ENSMUSG00000093577	predicted gene 20632 [Source:MGI Symbol;Acc:MGI:5313079]	gene	overlapping	0	2.342	0.465086	-0.0458109	0.215421	0.391031	-0.223729	-0.800698	-0.41737	-1.16059	0.136565	3.47273	3.74081	3.12637	3.07143	2.52123	2.65553	0.638043	-0.0637332	1.51282	1.03771
Abi2	1	60409619	60481162	+	0.00234526	Abi2	ENSMUSG00000026782	abl-interactor 2 [Source:MGI Symbol;Acc:MGI:106913]	gene	overlapping	0	-0.0503126	3.78701	3.43532	1.48844	0.239028	1.61757	3.49698	-0.41737	-3.3126	1.72153	4.74957	5.05185	1.7638	3.76916	3.80663	3.47656	4.94547	5.05521	4.90151	3.83645
Zfp704	3	9427011	9610085	-	0.000128013	Zfp704	ENSMUSG00000040209	zinc finger protein 704 [Source:MGI Symbol;Acc:MGI:2180715]	gene	overlapping	0	3.70457	3.51571	2.32342	3.13825	3.09147	3.08613	4.05728	1.28307	4.22311	3.11385	5.76664	5.98703	4.19485	5.81978	5.5436	6.23648	6.54253	0.258195	4.33098	3.89569
Fam122b	X	53243415	53269805	-	0.0285901	Fam122b	ENSMUSG00000036022	family with sequence similarity 122, member B [Source:MGI Symbol;Acc:MGI:1926005]	gene	overlapping	0	-2.05031	-2.49427	0.539152	3.59624	2.46142	3.9395	2.78426	3.53683	3.98915	1.45849	4.55365	4.97555	4.80819	3.92333	1.74362	2.03404	3.01655	7.25142	4.8536	3.90396
Fry	5	150259930	150497752	+	0.00969406	Fry	ENSMUSG00000056602	furry homolog (Drosophila) [Source:MGI Symbol;Acc:MGI:2443895]	gene	overlapping	0	2.47325	-2.34227	2.69115	3.28867	1.0691	-0.0013365	1.7018	-2.56937	0.839405	0.458494	4.3722	3.16126	2.81443	4.87878	3.31131	5.05698	3.27031	2.06555	3.53168	0.45275
Fzd3	14	65201026	65262463	-	0.0076791	Fzd3	ENSMUSG00000007989	frizzled homolog 3 (Drosophila) [Source:MGI Symbol;Acc:MGI:108476]	gene	overlapping	0	-2.20232	-1.34227	2.69115	2.08989	3.78335	2.38113	0.199302	4.04206	2.00933	2.13657	4.35725	5.32215	4.17561	4.47543	4.56562	5.41753	5.56404	-0.256378	2.26489	4.36564
Tead2	7	45215753	45233635	+	0.0186195	Tead2	ENSMUSG00000030796	TEA domain family member 2 [Source:MGI Symbol;Acc:MGI:104904]	gene	overlapping	0	-2.20232	0.465086	1.36923	2.69655	1.76954	2.2574	2.00666	1.48952	3.49762	1.38449	-2.22771	3.89498	4.24185	2.99928	5.11119	0.655531	4.5829	5.58732	3.85735	1.62267
Mbd1	18	74268272	74282685	+	0.00390853	Mbd1	ENSMUSG00000024561	methyl-CpG binding domain protein 1 [Source:MGI Symbol;Acc:MGI:1333811]	gene	overlapping	0	-0.46535	2.70213	-2.78278	-0.0476135	2.42665	2.51324	2.47232	1.38998	3.19696	3.18096	1.57965	3.00746	3.29629	4.10619	4.867	4.49683	5.55929	5.19836	3.09778	3.54021
Gm9888	9	114780100	114782257	+	4.19141e-05	Gm9888	ENSMUSG00000052724	predicted gene 9888 [Source:MGI Symbol;Acc:MGI:3642202]	gene	overlapping	0	-0.0503126	-1.34227	1.06967	1.43781	-0.123542	0.65074	0.421694	1.38998	1.7936	1.13657	3.35725	2.63973	3.91064	3.12327	3.85513	2.47656	2.80797	0.936267	2.19563	1.31073
Etl4	2	19909780	20810713	+	1.20297e-05	Etl4	ENSMUSG00000036617	enhancer trap locus 4 [Source:MGI Symbol;Acc:MGI:95454]	gene	overlapping	0	0.271616	4.46509	3.01308	4.37865	4.31703	3.07395	3.65873	2.22649	4.22311	3.75128	4.80571	5.21691	4.92223	4.18148	5.38335	6.99062	6.27031	5.12114	5.71404	6.53223
Rnasel	1	153749426	153764221	+	0.00240152	Rnasel	ENSMUSG00000066800	ribonuclease L (2', 5'-oligoisoadenylate synthetase-dependent) [Source:MGI Symbol;Acc:MGI:1098272]	gene	overlapping	0	-2.05031	1.65773	1.27612	0.717921	0.0691026	1.97267	3.56854	-0.0954419	0.00933021	1.89145	2.47273	3.28544	2.62887	3.71387	2.10619	0.836103	3.94547	5.22629	3.95838	3.84507
Dll3	7	28293553	28302238	-	0.000755207	Dll3	ENSMUSG00000003436	delta-like 3 (Drosophila) [Source:MGI Symbol;Acc:MGI:1096877]	gene	overlapping	0	1.75704	1.56462	-1.63077	3.50082	1.82399	1.86373	-0.385661	3.44061	1.48326	2.69115	4.35725	4.37203	3.314	5.77727	4.77547	2.8361	2.95997	3.69115	3.07224	4.3045
Fzd5	1	64730560	64737750	-	0.0206286	Fzd5	ENSMUSG00000045005	frizzled homolog 5 (Drosophila) [Source:MGI Symbol;Acc:MGI:108571]	gene	overlapping	0	1.11961	2.61193	2.06967	0.952387	0.391031	-2.80869	1.1993	0.58263	1.36297	-0.0560797	1.47273	2.89498	4.61466	-3.43813	-0.741805	4.3185	3.29339	3.52123	1.30928	3.99964
Chchd10	10	75935573	75937725	+	1.66316e-11	Chchd10	ENSMUSG00000049422	coiled-coil-helix-coiled-coil-helix domain containing 10 [Source:MGI Symbol;Acc:MGI:2143558]	gene	overlapping	0	3.5644	5.34423	3.15059	4.10619	3.39103	2.9462	3.36923	4.05836	4.17032	4.09076	6.39434	5.87782	5.90481	5.97362	6.60869	5.94586	6.80395	5.36253	4.57323	5.39526
Gipc1	8	83652678	83664788	+	0.0188645	Gipc1	ENSMUSG00000019433	GIPC PDZ domain containing family, member 1 [Source:MGI Symbol;Acc:MGI:1926252]	gene	overlapping	0	4.7441	0.465086	1.36923	3.48844	3.39103	2.77627	1.7018	2.71191	3.12481	2.52888	4.61778	4.64553	1.95644	4.55308	-3.21574	5.94831	6.67806	5.61222	3.78059	4.92848
1500009L16Rik	10	83722865	83762761	+	0.00166271	1500009L16Rik	ENSMUSG00000087651	RIKEN cDNA 1500009L16 gene [Source:MGI Symbol;Acc:MGI:1917034]	gene	overlapping	0	4.75704	1.24269	3.95419	3.85928	3.39103	4.16285	3.1379	2.94018	4.07781	5.54596	5.70893	6.06274	4.64993	6.09542	5.01308	6.5957	7.61074	0.106192	5.5755	6.39086
Ppp4r1	17	65782573	65841926	+	8.27474e-05	Ppp4r1	ENSMUSG00000061950	protein phosphatase 4, regulatory subunit 1 [Source:MGI Symbol;Acc:MGI:1917601]	gene	overlapping	0	0.949688	3.54037	2.17658	5.46335	4.13519	2.51324	3.1993	4.96633	4.70359	3.82307	5.4305	5.55897	5.58215	4.99465	5.79114	7.15484	6.89165	6.3957	4.79627	5.9645
Tmem203	2	25255439	25256352	+	0.00282645	Tmem203	ENSMUSG00000078201	transmembrane protein 203 [Source:MGI Symbol;Acc:MGI:2443597]	gene	overlapping	0	-2.05031	-2.49427	0.176581	1.67485	1.46142	2.54886	2.07377	2.58263	2.16133	1.94392	4.31145	3.41345	5.19006	2.98066	2.14572	2.72592	4.04404	2.84316	2.84985	3.09661
Nfil3	13	52967209	52981073	-	0.00643569	Nfil3	ENSMUSG00000056749	nuclear factor, interleukin 3, regulated [Source:MGI Symbol;Acc:MGI:109495]	gene	overlapping	0	0.271616	5.05005	2.61715	1.21542	-0.345935	2.36123	-1.38566	1.28307	1.00933	2.09076	1.85975	4.51208	5.64644	3.20573	4.11618	5.03866	4.36051	5.3957	3.91594	3.5923
Slc25a21	12	56712634	57197472	-	0.0453539	Slc25a21	ENSMUSG00000035472	solute carrier family 25 (mitochondrial oxodicarboxylate carrier), member 21 [Source:MGI Symbol;Acc:MGI:2445059]	gene	overlapping	0	2.40912	0.465086	1.17658	-2.36954	3.46142	1.32059	1.61434	1.90456	-3.3126	2.22403	1.85975	1.93346	2.51103	4.54676	3.59448	5.57201	3.48604	3.87878	3.45471	-3.54725
D630045J12Rik	6	38123174	38254009	-	0.0282385	D630045J12Rik	ENSMUSG00000063455	RIKEN cDNA D630045J12 gene [Source:MGI Symbol;Acc:MGI:2669829]	gene	overlapping	0	-2.20232	1.11716	-1.04581	-0.369542	2.0691	1.71487	1.7018	2.33752	1.8838	1.04346	4.02022	2.04308	3.46424	4.32858	2.45983	-3.25136	-1.09892	3.31131	2.8796	4.45275
Sap25	5	137641334	137642902	+	0.00973512	Sap25	ENSMUSG00000079165	sin3 associated polypeptide [Source:MGI Symbol;Acc:MGI:3802945]	gene	overlapping	0	2.90388	1.24269	2.57868	2.75974	4.15656	0.191309	1.1993	0.752555	2.33126	2.34602	-2.37971	5.78093	3.88718	3.62077	5.32858	3.97746	4.70843	3.67773	2.97913	4.70068
Mef2d	3	88142372	88172086	+	7.35507e-07	Mef2d	ENSMUSG00000001419	myocyte enhancer factor 2D [Source:MGI Symbol;Acc:MGI:99533]	gene	overlapping	0	4.45748	5.09236	2.98394	4.83991	4.66902	4.87781	1.93627	4.91355	4.41683	5.6796	6.8782	4.79405	6.78299	6.84058	6.71763	6.79985	6.61303	6.83411	5.27051	6.97042
Ube2d1	10	71254980	71285262	-	0.0156895	Ube2d1	ENSMUSG00000019927	ubiquitin-conjugating enzyme E2D 1, UBC4/5 homolog (yeast) [Source:MGI Symbol;Acc:MGI:2384911]	gene	overlapping	0	1.11961	-2.34227	3.51897	-1.78458	3.0691	1.51324	-2.38566	2.16759	1.92687	2.38449	3.96212	2.68553	0.541407	3.59652	4.29382	4.05242	2.52557	5.33287	2.33098	4.61766
Anp32a	9	62341293	62378812	+	0.000178837	Anp32a	ENSMUSG00000032249	acidic (leucine-rich) nuclear phosphoprotein 32 family, member A [Source:MGI Symbol;Acc:MGI:108447]	gene	overlapping	0	3.50428	0.465086	2.17658	2.67485	1.0691	2.12205	-0.385661	2.10619	2.64676	2.66013	3.63027	2.83528	4.63593	4.64461	2.06555	3.84667	4.52557	3.59448	4.23067	5.24717
Kdelr3	15	79516408	79527739	+	0.00484476	Kdelr3	ENSMUSG00000010830	KDEL (Lys-Asp-Glu-Leu) endoplasmic reticulum protein retention receptor 3 [Source:MGI Symbol;Acc:MGI:2145953]	gene	overlapping	0	3.27162	0.465086	-0.630773	2.30288	-1.34594	3.58363	3.34226	2.33752	3.82809	4.70642	3.94222	5.56511	5.24185	5.73901	3.45983	5.41398	5.34402	4.867	4.03968	4.40695
Gm10244	6	39419887	39421294	+	1.62471e-06	Gm10244	ENSMUSG00000068601	predicted gene 10244 [Source:MGI Symbol;Acc:MGI:3642504]	gene	overlapping	0	2.80767	3.43909	3.15059	2.15402	1.0691	1.36123	2.00666	1.67009	1.92687	2.18096	5.16461	4.34374	4.7378	4.62076	4.86108	4.03404	4.09748	2.867	2.24217	3.09661
Cep164	9	45766946	45828691	-	2.83823e-06	Cep164	ENSMUSG00000043987	centrosomal protein 164 [Source:MGI Symbol;Acc:MGI:2384878]	gene	overlapping	0	2.85658	1.74519	3.69115	4.1927	3.25893	3.39098	3.72286	0.752555	3.37856	2.38449	5.4305	4.22469	4.80193	5.54042	4.19365	4.56242	6.2079	4.76916	4.90513	5.03771
D5Ertd579e	5	36584788	36696024	-	9.59933e-05	D5Ertd579e	ENSMUSG00000029190	DNA segment, Chr 5, ERATO Doi 579, expressed [Source:MGI Symbol;Acc:MGI:1261849]	gene	overlapping	0	2.70458	1.65773	3.59805	2.87839	1.39103	3.52223	4.40876	3.19734	5.05857	4.16999	5.97196	6.16531	6.12637	6.16509	3.55098	4.67345	5.1299	5.27166	4.4298	5.67192
Fam129a	1	151571186	151721939	+	0.00362838	Fam129a	ENSMUSG00000026483	family with sequence similarity 129, member A [Source:MGI Symbol;Acc:MGI:2137237]	gene	overlapping	0	3.47325	-2.34227	3.98394	2.78021	3.37288	2.61757	4.28676	2.94018	4.35511	4.63641	4.88082	3.69676	4.26023	5.46542	4.94749	6.03866	7.01134	1.58012	5.87407	5.86214
Map2k6	11	110399122	110525522	+	0.00634612	Map2k6	ENSMUSG00000020623	mitogen-activated protein kinase kinase 6 [Source:MGI Symbol;Acc:MGI:1346870]	gene	overlapping	0	3.83233	-2.49427	2.61715	3.79033	4.48696	4.22473	4.98066	1.04206	1.69739	2.96946	4.73808	4.7079	4.096	4.7473	4.49851	6.72162	5.83181	4.95308	5.53635	6.26653
Phf10	17	14945009	14961273	-	8.13438e-05	Phf10	ENSMUSG00000023883	PHD finger protein 10 [Source:MGI Symbol;Acc:MGI:1919307]	gene	overlapping	0	2.342	5.70758	2.72678	3.71792	3.82399	3.60916	3.7018	3.81145	1.23172	3.22403	5.30367	6.77299	6.1438	6.26077	4.99155	4.42107	5.67367	5.10619	3.87222	6.0264
Id3	4	136143497	136145755	+	1.47163e-06	Id3	ENSMUSG00000007872	inhibitor of DNA binding 3 [Source:MGI Symbol;Acc:MGI:96398]	gene	overlapping	0	6.32037	5.62352	2.76154	5.53434	5.32177	4.28934	5.08194	3.69115	4.26567	4.78042	7.36101	5.6339	7.11758	6.59652	6.6419	7.16544	7.86204	5.93062	6.53752	6.9714
Prss57	10	79781474	79790961	-	1.82026e-06	Prss57	ENSMUSG00000020323	protease, serine 57 [Source:MGI Symbol;Acc:MGI:1920356]	gene	overlapping	0	4.92697	6.08818	4.41362	3.54932	4.97599	5.39588	3.76409	3.04206	4.69115	4.31647	5.03908	6.16935	6.73123	7.09542	6.20539	6.98943	7.74133	5.85513	6.39288	6.22424
Alpl	4	137741733	137796384	-	0.000223691	Alpl	ENSMUSG00000028766	alkaline phosphatase, liver/bone/kidney [Source:MGI Symbol;Acc:MGI:87983]	gene	overlapping	0	2.11961	2.46509	4.35791	2.12231	4.13519	5.03051	1.93627	3.605	4.05857	4.14779	5.50021	2.91435	5.46027	5.8224	6.14572	6.75847	5.2819	4.96417	5.10724	5.55604
Xlr5c	X	73282896	73292976	-	0.000657602	Xlr5c	ENSMUSG00000067764	X-linked lymphocyte-regulated 5C [Source:MGI Symbol;Acc:MGI:1350981]	gene	overlapping	0	-2.20232	3.05005	3.57868	3.63046	3.98797	4.1042	2.00666	3.55991	1.92687	2.78042	5.51376	5.09492	5.54516	4.78534	5.20305	3.10619	4.19876	5.99696	4.96533	4.08211
Chrnb4	9	55028156	55048544	-	0.0102077	Chrnb4	ENSMUSG00000035200	cholinergic receptor, nicotinic, beta polypeptide 4 [Source:MGI Symbol;Acc:MGI:87892]	gene	overlapping	0	-2.20232	0.657731	0.176581	-1.36954	-0.930898	-0.108252	-1.38566	-1.41737	-1.57563	-0.278472	0.0942192	1.00746	1.12637	0.414314	0.636707	2.55599	2.1741	-1.06373	-0.927756	2.09661
Asap2	12	21111748	21270171	+	0.009194	Asap2	ENSMUSG00000052632	ArfGAP with SH3 domain, ankyrin repeat and PH domain 2 [Source:MGI Symbol;Acc:MGI:2685438]	gene	overlapping	0	-2.20232	2.97966	2.53915	1.98801	2.46142	2.34106	1.31478	1.28307	3.37856	4.76592	4.57965	3.85545	4.80193	1.62076	5.07069	5.59413	5.27612	4.55832	2.8648	4.88738
Gkap1	13	58233351	58274188	-	9.38873e-06	Gkap1	ENSMUSG00000021552	G kinase anchoring protein 1 [Source:MGI Symbol;Acc:MGI:1891694]	gene	overlapping	0	4.01578	5.47151	3.32342	3.0734	3.87646	2.6991	3.91812	1.04206	3.26567	4.36538	6.4305	5.95232	4.22323	5.9689	4.83108	5.24849	6.28766	5.93345	5.08826	5.59995
Fam193a	5	34426337	34485747	+	0.00559148	Fam193a	ENSMUSG00000037210	family with sequence similarity 193, member A [Source:MGI Symbol;Acc:MGI:2447768]	gene	overlapping	0	3.62211	1.24269	2.22721	2.21542	3.0691	1.58363	3.91812	2.22649	2.81669	1.66013	2.77229	4.86046	5.87232	4.49523	4.76282	3.01543	-1.68389	5.5909	3.40444	3.99191
Hipk2	6	38694390	38876165	-	0.0215733	Hipk2	ENSMUSG00000061436	homeodomain interacting protein kinase 2 [Source:MGI Symbol;Acc:MGI:1314872]	gene	overlapping	0	-2.20232	3.01528	-0.308845	3.39864	2.62369	2.2574	3.3957	0.752555	2.33126	3.49412	-0.642746	5.31489	2.38271	5.3863	4.72417	4.37069	3.80797	4.94189	4.10409	3.12518
Tsen34	7	3693375	3701023	+	1.09537e-14	Tsen34	ENSMUSG00000035585	tRNA splicing endonuclease 34 homolog (S. cerevisiae) [Source:MGI Symbol;Acc:MGI:1913328]	gene	overlapping	0	4.01578	5.47791	4.82866	4.39864	4.38199	4.4487	4.09007	5.16759	5.00431	5.80545	6.51713	6.82508	6.63768	7.02107	7.12362	6.75427	6.74866	6.66078	5.60919	6.19926
Gm20634	3	96245554	96248509	+	0.0300976	Gm20634	ENSMUSG00000070392	predicted gene 20634 [Source:MGI Symbol;Acc:MGI:5313081]	gene	overlapping	0	1.75704	-0.757306	0.954189	1.75974	-0.930898	-0.638767	0.199302	-0.832408	-0.35324	-0.863435	3.47273	3.44042	2.34876	2.75827	2.52123	0.655531	0.316115	-2.06373	1.30928	0.260105
Tex19.2	11	121116215	121118677	-	0.00503486	Tex19.2	ENSMUSG00000039337	testis expressed gene 19.2 [Source:MGI Symbol;Acc:MGI:1918206]	gene	overlapping	0	2.70458	0.465086	1.27612	0.437813	2.71296	1.32059	1.42169	0.58263	1.00933	2.75128	1.85975	4.79927	-0.721627	3.32858	4.37921	3.19158	3.93082	2.10619	2.90875	3.98413
Ccnd1	7	144929931	144939869	-	0.0291278	Ccnd1	ENSMUSG00000070348	cyclin D1 [Source:MGI Symbol;Acc:MGI:88313]	gene	overlapping	0	3.37595	-2.49427	-2.78278	2.12231	4.23903	0.998664	3.34226	1.83056	1.83941	2.52888	3.12984	3.98931	4.5263	3.86362	2.76916	3.53	5.22301	4.42008	4.17778	5.41565
Aven	2	112492964	112634573	+	5.70515e-09	Aven	ENSMUSG00000003604	apoptosis, caspase activation inhibitor [Source:MGI Symbol;Acc:MGI:1921518]	gene	overlapping	0	4.21647	5.50948	4.49851	5.72849	4.05779	5.23023	5.10619	4.83056	5.70668	5.17548	7.95717	6.91915	7.11	6.88255	6.91783	6.95199	6.93633	6.24461	5.03307	6.08211
Tet2	3	133463679	133544390	-	0.0218961	Tet2	ENSMUSG00000040943	tet methylcytosine dioxygenase 2 [Source:MGI Symbol;Acc:MGI:2443298]	gene	overlapping	0	2.53465	1.46509	-1.63077	2.67485	2.15657	2.4581	2.93627	2.53683	2.29884	2.69115	0.579646	2.38597	2.24185	4.3212	1.89046	4.49011	6.23796	2.60869	2.21909	4.68157
Prdm14	1	13113457	13127163	-	0.00502918	Prdm14	ENSMUSG00000042414	PR domain containing 14 [Source:MGI Symbol;Acc:MGI:3588194]	gene	overlapping	0	1.94969	3.94313	3.49851	2.65283	2.97599	1.9462	0.421694	2.48952	-3.3126	3.79478	4.94222	4.94292	5.39524	3.35773	4.78176	4.11496	4.68244	4.81891	3.99281	2.03771
Gm7367	7	60155538	60156170	+	0.000548203	Gm7367	ENSMUSG00000047370	predicted pseudogene 7367 [Source:MGI Symbol;Acc:MGI:3646404]	gene	overlapping	0	2.40912	-0.757306	0.369227	1.21542	2.0233	1.43924	0.614339	2.48952	1.29884	1.13657	3.52718	1.85545	3.65688	4.01766	3.65051	2.1749	3.67367	3.56562	0.657207	2.77468
Fstl3	10	79777272	79782630	+	1.08265e-05	Fstl3	ENSMUSG00000020325	follistatin-like 3 [Source:MGI Symbol;Acc:MGI:1890391]	gene	overlapping	0	5.14936	6.36163	4.82866	3.60774	5.22897	5.53116	4.10619	3.16759	4.95315	4.26585	5.11214	6.20123	6.78775	7.20472	6.28721	7.21726	7.86686	5.89046	6.58794	6.37459
Zscan4f	7	11397915	11402741	+	0.00837333	Zscan4f	ENSMUSG00000070828	zinc finger and SCAN domain containing 4F [Source:MGI Symbol;Acc:MGI:3708485]	gene	overlapping	0	1.85658	3.82766	3.36923	-1.78458	4.09147	3.13382	3.76409	3.22649	1.42437	1.13657	4.02022	4.94292	4.096	5.94269	4.53618	4.49683	3.42464	0.395698	4.63121	6.00157
B4galt6	18	20684599	20746404	-	0.00987108	B4galt6	ENSMUSG00000056124	UDP-Gal:betaGlcNAc beta 1,4-galactosyltransferase, polypeptide 6 [Source:MGI Symbol;Acc:MGI:1928380]	gene	overlapping	0	1.65013	2.70213	2.12411	4.08167	1.71296	2.4581	2.86227	2.10619	3.00933	3.26585	0.772291	6.3825	5.23722	4.11475	4.37921	1.95809	4.33848	4.71763	3.84232	1.54021
Whrn	4	63414910	63495991	-	0.0226637	Whrn	ENSMUSG00000039137	whirlin [Source:MGI Symbol;Acc:MGI:2682003]	gene	overlapping	0	3.27162	-2.49427	4.49851	-3.52155	2.56096	1.65074	3.34226	2.86803	2.96869	1.72153	3.19856	4.59242	4.29629	5.06702	4.12609	4.14952	5.92714	4.06555	4.50329	3.34757
Capn1	19	5988546	6015825	-	1.21977e-08	Capn1	ENSMUSG00000024942	calpain 1 [Source:MGI Symbol;Acc:MGI:88263]	gene	overlapping	0	4.07897	4.92452	4.59805	3.37193	3.60826	4.19693	4.42169	3.51337	4.85063	4.64436	6.90928	6.20517	6.03059	5.74178	6.91783	5.98465	6.24981	4.88463	4.72841	4.87901
Bok	1	93685694	93695762	+	6.90464e-07	Bok	ENSMUSG00000026278	BCL2-related ovarian killer protein [Source:MGI Symbol;Acc:MGI:1858494]	gene	overlapping	0	4.76987	6.20848	4.68211	6.21917	3.96392	4.80969	3.74362	5.12952	6.07781	5.0673	6.64266	6.87659	7.284	6.86489	6.78019	6.83743	8.05589	7.18538	5.74467	6.96153
Fam132a	4	155962318	155966629	+	2.65228e-06	Fam132a	ENSMUSG00000023571	family with sequence similarity 132, member A [Source:MGI Symbol;Acc:MGI:1914639]	gene	overlapping	0	4.97206	3.99758	1.89279	2.91586	4.3545	3.87079	3.84316	3.86803	5.11553	4.28631	5.74383	5.6542	5.4523	6.2472	6.24233	4.98705	6.70198	5.28941	4.96879	6.19758
Fam46c	3	100451628	100489324	-	4.58219e-06	Fam46c	ENSMUSG00000044468	family with sequence similarity 46, member C [Source:MGI Symbol;Acc:MGI:1921895]	gene	overlapping	0	4.25347	6.46186	5.03456	4.86886	3.47849	4.4534	4.80416	4.26913	4.47603	3.62842	6.66103	6.13054	5.39107	5.54992	5.95029	7.12585	7.8926	6.00504	5.82713	6.74737
Ppp1r14a	7	29289320	29293390	+	0.0228671	Ppp1r14a	ENSMUSG00000037166	protein phosphatase 1, regulatory (inhibitor) subunit 14A [Source:MGI Symbol;Acc:MGI:1931139]	gene	overlapping	0	0.949688	1.97966	-1.04581	1.38535	-0.930898	0.891748	0.199302	2.16759	1.16133	0.595997	3.19856	2.00746	3.08573	3.87375	3.65051	2.2722	3.33848	-0.741805	1.30928	-1.96229
9130221H12Rik	7	25228687	25230257	+	0.00011545	9130221H12Rik	ENSMUSG00000090330	RIKEN cDNA 9130221H12 gene [Source:MGI Symbol;Acc:MGI:1924374]	gene	overlapping	0	2.11961	-0.342269	4.17658	1.15402	2.42665	2.68316	2.42169	1.83056	2.83941	3.11385	5.23172	5.01196	4.06497	4.52766	4.11618	4.3925	4.149	3.24005	3.74871	3.41853
Nt5c3	6	56882400	56923932	-	3.49068e-12	Nt5c3	ENSMUSG00000029780	5'-nucleotidase, cytosolic III [Source:MGI Symbol;Acc:MGI:1927186]	gene	overlapping	0	4.69115	5.35817	4.92382	3.97919	3.78335	3.87079	4.34226	4.63791	3.58087	4.72153	6.75528	5.41685	6.32713	6.56562	6.56562	5.18327	6.1616	6.59983	5.11664	5.88946
Bckdhb	9	83925150	84124239	+	0.000274996	Bckdhb	ENSMUSG00000032263	branched chain ketoacid dehydrogenase E1, beta polypeptide [Source:MGI Symbol;Acc:MGI:88137]	gene	overlapping	0	4.63619	1.90566	2.57868	2.5131	3.04638	2.27877	3.00666	2.48952	3.81669	3.40335	4.74957	3.74081	5.38271	3.48206	4.91355	6.0547	5.78372	3.74362	3.58682	4.49714
Zbtb46	2	181387762	181459426	-	0.00225024	Zbtb46	ENSMUSG00000027583	zinc finger and BTB domain containing 46 [Source:MGI Symbol;Acc:MGI:1919397]	gene	overlapping	0	1.75704	-1.34227	2.69115	4.26708	0.654065	3.01149	3.1379	2.38998	2.16133	2.18096	4.12984	4.37203	4.39107	3.26846	4.23089	4.15803	5.44024	4.42812	4.21909	3.18067
Xlr5b	X	73148796	73158872	+	0.00219879	Xlr5b	ENSMUSG00000072479	X-linked lymphocyte-regulated 5B [Source:MGI Symbol;Acc:MGI:3574109]	gene	overlapping	0	-2.20232	2.97966	3.47775	3.90658	4.26877	4.0368	2.00666	3.73238	2.36297	2.38449	5.20692	5.12432	5.66035	4.66224	5.01842	3.1749	4.42464	5.66078	5.05605	4.01499
Xlr5a	X	73107635	73292976	-	0.00561518	Xlr5a	ENSMUSG00000058328	X-linked lymphocyte-regulated 5A [Source:MGI Symbol;Acc:MGI:3574108]	gene	overlapping	0	-2.20232	2.86718	3.34651	4.20031	4.28827	4.24659	2.00666	3.99202	1.48326	2.83701	5.2399	5.27424	5.68776	5.03129	4.90205	2.8361	4.31611	5.83108	5.14141	4.38939
Zfp395	14	65358676	65398930	+	0.0120245	Zfp395	ENSMUSG00000034522	zinc finger protein 395 [Source:MGI Symbol;Acc:MGI:2682318]	gene	overlapping	0	-2.20232	1.56462	-0.630773	2.60774	2.65407	2.9462	2.7018	1.83056	2.62077	2.42197	2.29585	3.00746	4.5858	3.50829	2.98066	5.14524	4.2934	4.26718	2.01978	3.22093
Zscan4c	7	11005722	11010547	+	0.0220217	Zscan4c	ENSMUSG00000054272	zinc finger and SCAN domain containing 4C [Source:MGI Symbol;Acc:MGI:2685243]	gene	overlapping	0	1.85658	3.80748	2.92382	-3.36954	3.96392	2.79122	3.59162	3.19734	0.298837	1.38449	3.63027	4.32215	3.94513	5.86108	4.11618	4.09737	3.88597	-0.256378	4.33635	5.76109
Nkx6-2	7	139579377	139582797	-	0.00234526	Nkx6-2	ENSMUSG00000041309	NK6 homeobox 2 [Source:MGI Symbol;Acc:MGI:1352738]	gene	overlapping	0	1.11961	3.24269	1.45669	2.53735	0.876458	2.79122	2.07377	1.67009	3.40926	3.56283	3.05769	5.03868	2.68437	4.0085	4.83713	4.47656	5.3714	2.18419	2.8648	4.16011
Gm7334	17	50698525	50699880	+	0.02993	Gm7334	ENSMUSG00000044645	predicted gene 7334 [Source:MGI Symbol;Acc:MGI:3647393]	gene	overlapping	0	2.94969	4.22759	-1.04581	2.85928	3.25893	0.191309	2.36923	2.04206	2.08733	3.01921	4.79466	5.07785	4.87531	5.07143	3.76916	-0.444005	-0.683885	5.15059	3.58682	4.51884
Rai14	15	10568979	10714631	-	0.00998241	Rai14	ENSMUSG00000022246	retinoic acid induced 14 [Source:MGI Symbol;Acc:MGI:1922896]	gene	overlapping	0	4.90388	4.65773	-2.78278	3.3447	2.46142	2.83516	3.49698	2.79208	3.10619	3.78042	4.54048	5.83528	3.12637	5.61474	5.08601	5.78206	6.48353	4.65737	4.34171	3.58203
Btg3	16	78359860	78377192	-	0.0365182	Btg3	ENSMUSG00000022863	B cell translocation gene 3 [Source:MGI Symbol;Acc:MGI:109532]	gene	overlapping	0	3.40912	4.54037	-0.630773	3.31696	3.68381	1.04929	2.61434	2.58263	2.16133	3.22403	5.10321	5.37902	5.23722	5.49851	3.95863	0.333602	-2.68389	5.50232	4.07224	4.91627
Cox11	11	90638173	90644931	+	0.000755207	Cox11	ENSMUSG00000020544	COX11 homolog, cytochrome c oxidase assembly protein (yeast) [Source:MGI Symbol;Acc:MGI:1917052]	gene	overlapping	0	-1.05031	4.27244	4.90061	3.65283	3.91459	2.58363	3.31478	3.81145	4.49046	4.95035	6.53051	6.28358	4.70464	6.32674	5.76282	4.02476	6.06431	4.45197	4.83094	5.33539
Whamm	7	81571292	81596836	+	0.0481345	Whamm	ENSMUSG00000045795	WAS protein homolog associated with actin, golgi membranes and microtubules [Source:MGI Symbol;Acc:MGI:2142282]	gene	overlapping	0	1.11961	4.42592	1.36923	3.41182	2.59266	2.2574	1.07377	3.28307	3.16133	3.40335	5.3722	-3.46647	4.18526	4.66807	1.3957	5.05242	6.07434	3.71763	3.54101	5.13574
Frmd4b	6	97286867	97617541	-	0.00043217	Frmd4b	ENSMUSG00000030064	FERM domain containing 4B [Source:MGI Symbol;Acc:MGI:2141794]	gene	overlapping	0	3.23509	4.51571	1.76154	2.65283	3.37288	2.87781	3.52123	3.64872	2.72205	2.80899	3.44472	6.20713	4.83909	5.19769	4.67773	4.48335	5.42986	1.25819	5.43481	4.17385
Ppp1r26	2	28446800	28455508	+	0.000441784	Ppp1r26	ENSMUSG00000035829	protein phosphatase 1, regulatory subunit 26 [Source:MGI Symbol;Acc:MGI:2685193]	gene	overlapping	0	0.757042	0.465086	2.57868	3.15402	3.0233	4.08613	2.61434	3.44061	3.29884	3.01921	4.56671	4.37203	3.22323	3.63274	4.33715	5.60973	5.13629	3.91355	4.56867	5.10739
Lrch3	16	32914100	33015647	+	1.89295e-07	Lrch3	ENSMUSG00000022801	leucine-rich repeats and calponin homology (CH) domain containing 3 [Source:MGI Symbol;Acc:MGI:1917394]	gene	overlapping	0	2.342	2.94313	2.95419	4.13825	3.93947	3.24659	3.00666	3.10619	3.02923	4.00693	4.03908	5.02983	5.70128	4.46207	5.3957	4.58153	5.20486	4.90205	4.30381	5.45556
Trove2	1	143750790	143777068	-	0.0365239	Trove2	ENSMUSG00000018199	TROVE domain family, member 2 [Source:MGI Symbol;Acc:MGI:106652]	gene	overlapping	0	-0.46535	5.52192	2.27612	2.91586	3.40895	0.439236	3.80416	1.67009	1.53984	2.78042	5.03908	2.87535	3.18526	2.9037	4.33715	2.10619	5.36596	6.66419	4.32017	5.84721
Mtx2	2	74825803	74878431	+	1.21977e-08	Mtx2	ENSMUSG00000027099	metaxin 2 [Source:MGI Symbol;Acc:MGI:1859652]	gene	overlapping	0	3.70457	5.97514	3.82866	4.43781	4.48696	4.0982	4.61434	6.09042	5.33126	4.89145	6.89641	6.65851	6.3118	6.983	7.10494	6.20191	6.58056	6.6419	5.57777	6.39233
Klf8	X	153237466	153396132	+	0.00166204	Klf8	ENSMUSG00000041649	Kruppel-like factor 8 [Source:MGI Symbol;Acc:MGI:2442430]	gene	overlapping	0	4.96091	5.9385	3.81217	4.71792	3.47849	4.71094	3.56854	4.63791	4.43932	0.30649	6.68218	5.80447	3.39939	5.52445	4.84316	5.58153	7.08099	6.65223	6.29141	6.63639
H2afj	6	136808248	136810074	+	0.0034419	H2afj	ENSMUSG00000060032	H2A histone family, member J [Source:MGI Symbol;Acc:MGI:3606192]	gene	overlapping	0	3.99408	5.14155	4.17658	3.58465	4.27856	2.82067	2.52123	4.05836	2.36297	1.78042	5.73229	5.76768	6.69791	5.89875	6.42612	3.08849	3.01655	3.98066	3.74062	4.42429
Tbl1xr1	3	22076652	22216594	+	0.0025315	Tbl1xr1	ENSMUSG00000027630	transducin (beta)-like 1X-linked receptor 1 [Source:MGI Symbol;Acc:MGI:2441730]	gene	overlapping	0	3.80767	5.33016	1.61715	1.21542	4.7902	3.84952	5.27968	4.50149	4.77604	4.36538	6.34594	4.9382	5.85126	6.34505	5.06039	6.66452	6.93633	2.49086	6.24503	5.67434
Zfp532	18	65580230	65689434	+	0.0145045	Zfp532	ENSMUSG00000042439	zinc finger protein 532 [Source:MGI Symbol;Acc:MGI:3036282]	gene	overlapping	0	3.50428	2.70213	2.76154	4.29579	3.15657	3.20254	4.1535	3.97495	-1.57563	1.72153	3.32688	6.14905	2.54141	4.81191	1.69115	5.619	5.27031	4.84316	3.82713	5.73352
Cdc42ep5	7	4151260	4164860	-	0.0197374	Cdc42ep5	ENSMUSG00000063838	CDC42 effector protein (Rho GTPase binding) 5 [Source:MGI Symbol;Acc:MGI:1929745]	gene	overlapping	0	2.80767	-0.757306	2.01308	4.11427	4.60048	4.29983	3.16893	1.67009	3.81669	3.22403	4.72649	3.68553	6.21383	5.73346	6.26045	2.8361	4.47599	4.29382	4.66577	3.45275
Gm12446	4	46300007	46345515	-	5.44086e-05	Gm12446	ENSMUSG00000087383	predicted gene 12446 [Source:MGI Symbol;Acc:MGI:3651433]	gene	overlapping	0	0.949688	3.33016	4.50878	4.69655	3.7556	4.63425	3.84316	4.51337	4.17032	3.98206	6.41975	4.73538	6.6057	6.15059	5.86108	4.62516	5.48102	4.31997	5.4719	5.35362
Fkbp1b	12	4833175	4841595	-	0.00111772	Fkbp1b	ENSMUSG00000020635	FK506 binding protein 1b [Source:MGI Symbol;Acc:MGI:1336205]	gene	overlapping	0	2.342	4.03277	3.67301	3.67485	3.97599	3.99221	3.2582	2.04206	1.59429	4.72902	4.90157	5.6339	5.39107	6.2627	6.15301	4.21624	3.24685	4.412	3.58682	5.19084
Fdx1	9	51943307	51963533	-	5.09218e-05	Fdx1	ENSMUSG00000032051	ferredoxin 1 [Source:MGI Symbol;Acc:MGI:103224]	gene	overlapping	0	3.11961	3.38565	3.61715	4.03134	1.46142	4.08613	4.1535	3.28307	4.50474	4.86449	5.23172	5.32577	5.69791	5.94029	4.70445	5.32607	4.65597	6.36881	4.15971	5.87271
Coro1a	7	126699773	126707787	-	0.0111475	Coro1a	ENSMUSG00000030707	coronin, actin binding protein 1A [Source:MGI Symbol;Acc:MGI:1345961]	gene	overlapping	0	2.65013	0.657731	3.81217	2.12231	5.28342	0.191309	4.63671	4.93136	4.91087	4.98831	5.64266	7.0142	5.25107	6.07362	6.5436	5.13666	3.67367	5.11618	5.11351	5.70778
Bri3	5	144244437	144446757	+	3.72522e-05	Bri3	ENSMUSG00000047843	brain protein I3 [Source:MGI Symbol;Acc:MGI:1933174]	gene	overlapping	0	3.50428	5.30159	3.81217	3.59624	3.39103	3.55763	3.07377	3.19734	4.29884	4.64436	6.29585	5.31124	6.02522	6.12114	6.20773	5.42107	5.91603	3.96969	4.25357	3.9526
Il2	3	37120523	37125959	-	0.00181321	Il2	ENSMUSG00000027720	interleukin 2 [Source:MGI Symbol;Acc:MGI:96548]	gene	overlapping	0	0.53465	0.827656	-0.0458109	-1.04761	0.654065	-0.0013365	-0.385661	-0.832408	-0.838667	-1.27847	1.94222	1.63973	1.20437	1.62076	-0.741805	1.55599	2.12347	0.106192	2.01978	1.58203
Wrnip1	13	32802038	32822609	+	0.000500954	Wrnip1	ENSMUSG00000021400	Werner helicase interacting protein 1 [Source:MGI Symbol;Acc:MGI:1926153]	gene	overlapping	0	-0.46535	3.61193	4.84496	3.91586	4.96997	4.06167	5.04897	4.35081	4.50474	3.98206	5.47965	6.59392	4.80193	6.40212	6.97656	5.16649	4.41415	5.53989	5.46946	5.77242
Tcfl5	2	180621956	180642708	-	0.000236178	Tcfl5	ENSMUSG00000038932	transcription factor-like 5 (basic helix-loop-helix) [Source:MGI Symbol;Acc:MGI:2672878]	gene	overlapping	0	4.30724	5.40592	3.74427	4.22292	3.79702	3.04929	2.2582	4.16759	4.72205	5.03743	3.29585	5.41685	6.43623	5.54676	4.80663	5.65252	7.00786	6.03166	5.7161	6.21264
Creg1	1	165763746	165775308	+	0.000113308	Creg1	ENSMUSG00000040713	cellular repressor of E1A-stimulated genes 1 [Source:MGI Symbol;Acc:MGI:1344382]	gene	overlapping	0	4.69115	6.21615	4.5689	0.800383	6.11623	4.49052	4.91812	4.31055	4.21444	5.11385	6.08517	7.09492	6.84062	7.08238	6.55282	5.98943	6.31047	6.58732	6.41717	6.17385
Lpgat1	1	191717834	191784255	+	9.46972e-07	Lpgat1	ENSMUSG00000026623	lysophosphatidylglycerol acyltransferase 1 [Source:MGI Symbol;Acc:MGI:2446186]	gene	overlapping	0	3.37595	6.74519	6.08347	6.06925	5.27856	5.12795	5.56854	5.96201	6.60593	6.75862	7.65646	8.00971	8.03593	7.86616	7.12238	7.21828	7.55571	7.78489	6.35765	7.15232
Mpv17l2	8	70758649	70760921	-	0.000251795	Mpv17l2	ENSMUSG00000035559	MPV17 mitochondrial membrane protein-like 2 [Source:MGI Symbol;Acc:MGI:2681846]	gene	overlapping	0	2.99408	0.979659	2.49851	2.85928	1.39103	1.61757	2.36923	2.97495	3.23172	3.69115	3.55365	3.83528	4.33148	3.3863	5.50232	4.52343	3.60152	4.62975	2.89425	4.09661
Reps2	X	162411954	162643649	-	0.0167099	Reps2	ENSMUSG00000040855	RALBP1 associated Eps domain containing protein 2 [Source:MGI Symbol;Acc:MGI:2663511]	gene	overlapping	0	-0.0503126	1.11716	3.84496	3.16962	4.34523	4.40076	4.2582	3.77245	2.36297	3.69115	4.19856	4.17738	4.07539	1.71387	4.76282	5.01073	5.071	7.00101	5.12598	4.9645
2410003K15Rik	6	49073795	49086751	+	1.61307e-05	2410003K15Rik	ENSMUSG00000029815	RIKEN cDNA 2410003K15 gene [Source:MGI Symbol;Acc:MGI:1922843]	gene	overlapping	0	4.21647	6.07558	2.57868	5.1927	4.50373	4.51324	4.31478	4.05836	5.17926	4.89145	5.99629	7.05294	6.64469	6.94029	6.32858	5.57519	6.04404	5.60515	5.67852	6.18746
Trp53	11	69580359	69591873	+	0.0442336	Trp53	ENSMUSG00000059552	transformation related protein 53 [Source:MGI Symbol;Acc:MGI:98834]	gene	overlapping	0	4.01578	1.74519	1.36923	5.2707	5.82399	4.75355	4.92722	0.167592	2.04886	3.01921	5.42334	6.31124	5.17561	5.40736	5.92211	6.48504	4.32734	5.16027	3.74871	6.83537
Fam126a	5	23915276	24030690	-	0.000427399	Fam126a	ENSMUSG00000028995	family with sequence similarity 126, member A [Source:MGI Symbol;Acc:MGI:2149839]	gene	overlapping	0	3.50428	3.38565	2.95419	0.215421	3.99984	1.58363	3.10619	2.83056	1.83941	2.13657	5.07607	4.27049	4.1659	2.57186	4.16509	4.19158	5.00262	4.75005	3.07224	4.7926
1700025G04Rik	1	151884524	152090320	-	0.0427398	1700025G04Rik	ENSMUSG00000032666	RIKEN cDNA 1700025G04 gene [Source:MGI Symbol;Acc:MGI:1916649]	gene	overlapping	0	-1.05031	-1.34227	2.86108	1.48844	4.30751	3.89867	3.91812	2.79208	5.21878	3.36538	4.32688	5.64263	3.93372	5.38276	2.81891	5.30323	5.63353	4.48316	5.49371	5.17726
Bdh1	16	31422280	31458901	+	0.00250313	Bdh1	ENSMUSG00000046598	3-hydroxybutyrate dehydrogenase, type 1 [Source:MGI Symbol;Acc:MGI:1919161]	gene	overlapping	0	3.15914	3.43909	1.76154	1.80038	5.58086	5.38113	4.93627	5.27612	4.75229	5.29138	5.98661	6.25918	6.04656	6.29884	5.66759	6.11715	7.29339	5.03955	5.66577	6.04521
Samd1	8	83997672	84000386	+	2.94647e-08	Samd1	ENSMUSG00000079003	sterile alpha motif domain containing 1 [Source:MGI Symbol;Acc:MGI:2142433]	gene	overlapping	0	3.53465	4.31594	3.69115	3.69655	4.8173	4.27346	3.78426	5.20468	4.86731	5.03138	6.04842	5.71895	6.54516	6.36133	5.91068	6.10399	5.41415	6.23089	5.44231	4.89154
Akap7	10	25169090	25307870	-	0.000255359	Akap7	ENSMUSG00000039166	A kinase (PRKA) anchor protein 7 [Source:MGI Symbol;Acc:MGI:1859150]	gene	overlapping	0	5.23509	2.30159	3.69115	4.15402	4.08033	3.54886	4.07377	4.19734	3.16133	3.70642	5.26414	6.08854	6.30517	6.40038	4.78176	3.59413	4.69115	5.31997	4.16576	5.73584
Erf	7	25242561	25250761	-	0.0435624	Erf	ENSMUSG00000040857	Ets2 repressor factor [Source:MGI Symbol;Acc:MGI:109637]	gene	overlapping	0	0.949688	3.05005	0.539152	1.38535	4.37288	-0.223729	3.56854	2.38998	0.926868	2.38449	5.19014	3.20909	4.91064	4.8224	4.50612	2.10619	3.77555	2.79425	3.9231	0.622675
Mtmr7	8	40551095	40634797	-	0.0439432	Mtmr7	ENSMUSG00000039431	myotubularin related protein 7 [Source:MGI Symbol;Acc:MGI:1891693]	gene	overlapping	0	-2.20232	2.94313	1.36923	4.21542	2.19839	3.47671	3.07377	3.41552	4.24028	4.04346	5.11214	4.99387	4.35732	2.92333	1.63671	4.77101	5.23498	5.55098	3.25357	5.86002
Klhl15	X	94234599	94277724	+	0.000971579	Klhl15	ENSMUSG00000043929	kelch-like 15 (Drosophila) [Source:MGI Symbol;Acc:MGI:1923400]	gene	overlapping	0	1.94969	5.97514	5.79129	4.63608	4.12439	3.87079	2.2582	4.15249	3.58087	3.91793	6.81121	5.22469	6.25336	6.56406	5.34566	4.67345	5.69115	6.31131	5.11664	6.42286
Lass6	2	68861441	69114282	+	0.00905024	Lass6	ENSMUSG00000027035	LAG1 homolog, ceramide synthase 6 [Source:MGI Symbol;Acc:MGI:2442564]	gene	overlapping	0	1.65013	4.47791	2.69115	3.52528	3.3545	4.0368	2.56854	3.33752	3.48326	3.36538	4.02022	2.68553	4.26933	5.60262	1.74362	5.46289	6.56641	4.56562	3.85735	4.78367
6330439K17Rik	2	144470557	144527414	-	0.00399751	6330439K17Rik	ENSMUSG00000037259	RIKEN cDNA 6330439K17 gene [Source:MGI Symbol;Acc:MGI:2139080]	gene	overlapping	0	1.40912	3.21232	1.82866	3.08989	3.78335	2.95949	4.32858	2.71191	1.83941	1.94392	2.85975	4.45371	5.13137	4.69687	5.49851	3.56882	3.24685	5.42812	2.97913	3.49714
Neat1	19	5824708	5845478	-	0.0199519	Neat1	ENSMUSG00000092274	nuclear paraspeckle assembly transcript 1 (non-protein coding) [Source:MGI Symbol;Acc:MGI:1914211]	gene	overlapping	0	3.88042	4.084	3.01308	5.37529	3.71296	4.28407	3.2582	-2.56937	4.77604	4.45849	5.02022	4.8704	6.51678	6.09758	4.6016	5.58784	6.10728	5.84015	5.08826	4.32927
Dock5	14	67751928	67933572	-	0.0124049	Dock5	ENSMUSG00000044447	dedicator of cytokinesis 5 [Source:MGI Symbol;Acc:MGI:2652871]	gene	overlapping	0	-0.46535	4.6801	-1.63077	4.3447	4.72731	4.32059	5.01522	4.83056	4.56733	4.75127	5.74957	4.97555	5.0492	6.13594	5.77547	6.35412	6.56641	5.13102	5.44976	5.93657
Grin1	2	25291181	25319187	-	0.013211	Grin1	ENSMUSG00000026959	glutamate receptor, ionotropic, NMDA1 (zeta 1) [Source:MGI Symbol;Acc:MGI:95819]	gene	overlapping	0	3.19761	2.41262	2.57868	2.53735	2.59266	4.30505	1.61434	5.43438	5.29473	5.73648	6.32688	6.01196	4.11632	6.20773	5.42812	6.06605	5.99911	4.93627	5.17478	5.44993
Fabp5	3	10012548	10016607	+	0.0125691	Fabp5	ENSMUSG00000027533	fatty acid binding protein 5, epidermal [Source:MGI Symbol;Acc:MGI:101790]	gene	overlapping	0	3.65013	3.61193	0.369227	3.23037	2.82399	2.6991	3.80416	2.48952	0.298837	4.48529	5.64266	4.09492	4.38271	4.24526	3.00236	4.66153	6.01308	2.84316	4.45471	4.11096
Tm7sf3	6	146602352	146642824	-	9.37501e-05	Tm7sf3	ENSMUSG00000040234	transmembrane 7 superfamily member 3 [Source:MGI Symbol;Acc:MGI:1914873]	gene	overlapping	0	4.57904	4.3992	2.98394	4.41836	2.68381	2.29983	3.22905	2.67009	3.65958	4.00693	5.08517	4.91915	5.30517	5.27612	3.76916	5.96539	5.7632	5.14084	4.27051	4.62768
2310030N02Rik	4	11051045	11076205	-	0.00418982	2310030N02Rik	ENSMUSG00000050323	RIKEN cDNA 2310030N02 gene [Source:MGI Symbol;Acc:MGI:1924197]	gene	overlapping	0	1.75704	4.31594	2.57868	2.65283	1.59266	2.42013	3.0406	2.94018	4.08733	3.18096	4.74957	2.98931	5.72793	2.07143	5.11618	4.31088	5.23498	4.69115	3.48406	3.47512
Ythdf3	3	16183183	16217035	+	0.00477571	Ythdf3	ENSMUSG00000047213	YTH domain family 3 [Source:MGI Symbol;Acc:MGI:1918850]	gene	overlapping	0	1.85658	5.9009	4.09715	5.44424	4.41783	4.11612	4.77421	4.36399	3.58087	4.72153	4.31145	5.11598	3.86334	6.16509	4.285	6.25841	6.81795	7.17586	5.81371	6.94159
Cadm1	9	47530173	47857637	+	0.00799783	Cadm1	ENSMUSG00000032076	cell adhesion molecule 1 [Source:MGI Symbol;Acc:MGI:1889272]	gene	overlapping	0	1.40912	3.84756	2.57868	2.85928	3.09147	2.6991	2.36923	3.19734	3.6849	3.28631	2.98174	3.67421	3.7638	3.49523	0.395699	4.67345	5.95274	4.58012	4.69115	5.25041
Fam92a	4	12153409	12172015	-	0.010531	Fam92a	ENSMUSG00000028218	family with sequence similarity 92, member A [Source:MGI Symbol;Acc:MGI:1915349]	gene	overlapping	0	2.03715	4.01528	0.539152	2.63046	1.92708	1.0982	3.1993	2.16759	0.161333	1.596	4.29585	4.54972	4.718	2.57186	3.99155	2.3925	4.05758	1.25819	3.03307	3.96845
2310036O22Rik	8	85026833	85030285	+	1.13534e-06	2310036O22Rik	ENSMUSG00000041203	RIKEN cDNA 2310036O22 gene [Source:MGI Symbol;Acc:MGI:1922833]	gene	overlapping	0	5.34201	6.78959	5.28212	4.70192	4.88288	4.90555	4.74362	6.00469	5.1748	5.80545	7.80296	7.07139	7.35091	7.03805	7.3499	6.84272	7.07767	5.86404	5.22489	6.21762
Abcb1a	5	8660077	8748575	+	0.00746284	Abcb1a	ENSMUSG00000040584	ATP-binding cassette, sub-family B (MDR/TAP), member 1A [Source:MGI Symbol;Acc:MGI:97570]	gene	overlapping	0	1.11961	3.30159	3.09715	3.65283	3.0691	2.76116	3.31478	3.92248	4.06822	4.73648	6.08517	3.75162	2.88718	3.58424	3.00236	6.01777	5.1741	4.32858	4.88694	5.77468
Serpinb6a	13	33917918	34002794	-	0.0166591	Serpinb6a	ENSMUSG00000060147	serine (or cysteine) peptidase inhibitor, clade B, member 6a [Source:MGI Symbol;Acc:MGI:103123]	gene	overlapping	0	6.29398	3.65773	5.56398	-0.562187	4.25893	4.38607	5.32858	4.22649	4.19696	3.86449	6.0897	5.58941	6.61822	4.67966	4.33715	6.52672	7.52922	4.30259	6.25641	6.55735
Slitrk4	X	64264885	64276996	-	0.0470221	Slitrk4	ENSMUSG00000046699	SLIT and NTRK-like family, member 4 [Source:MGI Symbol;Acc:MGI:2442509]	gene	overlapping	0	-2.20232	-2.49427	-2.78278	-3.52155	-2.9309	-2.80869	-2.53766	-2.56937	-3.3126	-3.01544	-1.22771	-2.31447	-2.04356	-1.28613	-2.06373	-1.25136	-1.68389	-0.256378	-0.565186	-2.54725
Tmigd1	11	76902159	76916587	+	0.00549157	Tmigd1	ENSMUSG00000020839	transmembrane and immunoglobulin domain containing 1 [Source:MGI Symbol;Acc:MGI:1913851]	gene	overlapping	0	4.25347	1.24269	4.18941	4.30994	2.92708	2.0242	3.93627	4.24084	2.51183	4.66795	6.64881	5.72992	5.46027	5.20171	4.76916	4.92855	4.3048	2.42812	4.18375	4.93253
Txnrd2	16	18426417	18479073	+	0.0151332	Txnrd2	ENSMUSG00000075704	thioredoxin reductase 2 [Source:MGI Symbol;Acc:MGI:1347023]	gene	overlapping	0	2.85658	3.38565	3.59805	3.12231	2.49537	3.29983	3.78426	3.31055	5.49046	5.11385	4.48654	4.86544	3.92223	5.89378	5.72417	6.5576	6.40887	5.20305	2.21909	4.38349
Zfp810	9	22276748	22307638	-	0.0225899	Zfp810	ENSMUSG00000066829	zinc finger protein 810 [Source:MGI Symbol;Acc:MGI:2384563]	gene	overlapping	0	3.80767	4.46509	0.954189	3.24517	2.23903	3.1455	2.42169	3.33752	3.6723	2.96946	2.41615	3.09492	4.21383	6.19567	4.65051	1.74864	4.09748	6.20773	4.07867	4.09661
Ctbp2	7	132987563	133124354	-	2.74173e-05	Ctbp2	ENSMUSG00000030970	C-terminal binding protein 2 [Source:MGI Symbol;Acc:MGI:1201686]	gene	overlapping	0	4.48885	6.30878	5.03456	4.98801	6.36831	4.40076	5.45354	5.18254	4.2488	5.42658	6.40165	6.19728	5.92799	6.82501	6.7258	7.10949	8.1702	5.87291	5.77466	6.83861
Htatip2	7	49759106	49773999	+	0.0102308	Htatip2	ENSMUSG00000039745	HIV-1 tat interactive protein 2, homolog (human) [Source:MGI Symbol;Acc:MGI:1859271]	gene	overlapping	0	2.80767	2.61193	-1.63077	2.69655	3.40895	3.0242	3.16893	3.38998	4.56733	4.43119	4.73808	5.51208	3.89896	5.14014	4.83713	2.97746	5.22301	5.18893	3.87222	4.71014
Trp53rk	2	166792531	166799505	+	0.000796469	Trp53rk	ENSMUSG00000042854	transformation related protein 53 regulating kinase [Source:MGI Symbol;Acc:MGI:1914050]	gene	overlapping	0	3.15914	3.61193	3.43532	3.16962	2.39103	3.2357	3.7018	3.81145	3.64676	3.78042	5.95717	5.32577	5.51487	4.98534	4.62277	1.50353	4.69982	4.94749	2.8796	4.0748
Csk	9	57626647	57645653	-	0.00108103	Csk	ENSMUSG00000032312	c-src tyrosine kinase [Source:MGI Symbol;Acc:MGI:88537]	gene	overlapping	0	4.48885	3.05005	4.90061	5.30642	3.1135	5.05549	5.61434	3.22649	5.95835	4.50289	6.45177	6.08641	6.05448	5.43155	6.4793	6.19985	7.23498	6.33073	4.56867	6.15319
Actn1	12	80167542	80260371	-	0.0158521	Actn1	ENSMUSG00000015143	actinin, alpha 1 [Source:MGI Symbol;Acc:MGI:2137706]	gene	overlapping	0	1.75704	1.97966	-1.04581	1.3309	2.35451	2.0242	1.7018	2.22649	2.42437	2.75128	3.70303	0.933457	3.4483	4.44179	-0.063733	3.43514	3.6199	2.84316	3.42476	3.87901
Tns3	11	8431652	8664535	-	0.00164021	Tns3	ENSMUSG00000020422	tensin 3 [Source:MGI Symbol;Acc:MGI:2443012]	gene	overlapping	0	4.51954	1.46509	3.17658	3.30288	3.74153	2.97267	3.31478	4.33752	3.48326	1.72153	5.18168	5.09492	4.08573	5.03129	4.89627	4.56882	5.88597	1.98066	4.61804	4.90396
Egfl7	2	26580014	26593120	+	0.0390807	Egfl7	ENSMUSG00000026921	EGF-like domain 7 [Source:MGI Symbol;Acc:MGI:2449923]	gene	overlapping	0	0.53465	1.90566	1.06967	0.330898	2.76954	1.40076	0.199302	1.04206	1.64676	2.22403	1.47273	1.85545	3.62887	1.46876	1.74362	3.60662	4.64703	1.45983	0.724321	3.27293
9930021J03Rik	19	29714402	29806009	-	0.000351708	9930021J03Rik	ENSMUSG00000046138	RIKEN cDNA 9930021J03 gene [Source:MGI Symbol;Acc:MGI:2444398]	gene	overlapping	0	3.19761	5.10067	4.29996	4.17735	5.19322	2.6991	4.68043	4.07448	3.69739	3.89145	6.63957	5.56817	6.11126	2.75827	5.67436	4.84667	6.29625	5.81891	4.93377	5.3506
5430407P10Rik	2	6100025	6130211	-	0.0196493	5430407P10Rik	ENSMUSG00000045319	RIKEN cDNA 5430407P10 gene [Source:MGI Symbol;Acc:MGI:2442238]	gene	overlapping	0	2.11961	3.51571	4.75293	3.13825	2.52853	2.68316	2.56854	3.33752	3.77014	3.18096	3.77229	4.46689	5.5489	3.41431	6.5638	5.08849	4.54493	0.843157	2.96533	3.68157
Trp53inp1	4	11156431	11174379	+	0.029913	Trp53inp1	ENSMUSG00000028211	transformation related protein 53 inducible nuclear protein 1 [Source:MGI Symbol;Acc:MGI:1926609]	gene	overlapping	0	0.53465	5.24269	3.70908	5.27431	4.67643	3.9661	2.36923	3.22649	1.59429	3.34602	3.74957	4.06923	5.40766	5.0802	5.2627	4.90346	3.01655	6.57289	5.92131	6.2951
Tmem145	7	25306106	25316195	+	0.0146181	Tmem145	ENSMUSG00000043843	transmembrane protein 145 [Source:MGI Symbol;Acc:MGI:3607779]	gene	overlapping	0	-2.20232	1.35817	2.12411	2.80038	2.1135	2.54886	2.7018	3.22649	3.7463	3.44035	4.61778	4.71344	3.36584	3.75827	4.285	4.46974	4.071	4.23089	1.55029	3.71014
Fech	18	64456550	64489066	-	0.0443572	Fech	ENSMUSG00000024588	ferrochelatase [Source:MGI Symbol;Acc:MGI:95513]	gene	overlapping	0	3.65013	4.75576	3.86108	4.14616	3.79702	2.2574	1.7018	4.57131	4.36297	4.22403	4.41615	5.79666	-3.04356	6.86869	3.20305	5.63128	4.93817	5.88463	4.63993	5.33233
Isl2	9	55538672	55546180	+	0.0423624	Isl2	ENSMUSG00000032318	insulin related protein 2 (islet 2) [Source:MGI Symbol;Acc:MGI:109156]	gene	overlapping	0	2.80767	4.73455	2.92382	3.78021	-3.0829	4.0242	3.98938	4.67009	2.83941	3.80899	5.24802	4.78356	4.97881	4.838	5.22167	6.02709	6.41415	3.62277	2.19563	4.02261
D14Ertd668e	14	59347407	59365470	-	0.00487281	D14Ertd668e	ENSMUSG00000068245	DNA segment, Chr 14, ERATO Doi 668, expressed [Source:MGI Symbol;Acc:MGI:1277133]	gene	overlapping	0	4.21647	2.86718	3.09715	1.98801	2.56096	0.835165	2.86227	2.86803	1.92687	3.40335	4.56671	3.87535	2.86334	4.44179	4.75645	4.24849	5.45567	1.02373	3.69952	4.4471
Kcnf1	12	17172102	17176888	-	0.0235336	Kcnf1	ENSMUSG00000051726	potassium voltage-gated channel, subfamily F, member 1 [Source:MGI Symbol;Acc:MGI:2687399]	gene	overlapping	0	4.37595	4.3992	1.82866	1.75974	2.19839	3.41048	3.56854	3.77245	2.04886	1.52888	1.35725	2.32939	5.36584	4.89378	5.62627	5.2722	5.4194	3.83108	3.79627	3.54021
Kazn	4	142102390	142239401	-	0.0418549	Kazn	ENSMUSG00000040606	kazrin, periplakin interacting protein [Source:MGI Symbol;Acc:MGI:1918779]	gene	overlapping	0	5.05821	2.74519	3.01308	3.50082	4.52031	3.34106	3.07377	1.83056	0.926868	4.96311	4.56671	2.68553	5.80193	4.86362	5.21239	5.98943	6.45567	2.3957	4.83854	4.09661
Plxnb2	15	89155549	89171120	-	0.0159611	Plxnb2	ENSMUSG00000036606	plexin B2 [Source:MGI Symbol;Acc:MGI:2154239]	gene	overlapping	0	5.77624	4.83764	2.01308	5.49464	4.40895	4.34613	4.2582	2.58263	3.95835	5.11956	4.387	6.11598	5.63944	4.66807	5.97793	6.87017	7.51456	3.99155	5.25924	5.90808
Psmd10	X	140948429	140956728	-	0.00894529	Psmd10	ENSMUSG00000031429	proteasome (prosome, macropain) 26S subunit, non-ATPase, 10 [Source:MGI Symbol;Acc:MGI:1858898]	gene	overlapping	0	2.27162	4.47791	1.76154	3.81037	2.35451	5.1012	4.5332	2.38998	3.17926	1.89145	5.48654	5.04308	4.17561	3.71387	4.81891	5.12802	5.3048	4.71105	5.58907	5.05266
Prmt1	7	44975989	44986492	-	0.000633783	Prmt1	ENSMUSG00000052429	protein arginine N-methyltransferase 1 [Source:MGI Symbol;Acc:MGI:107846]	gene	overlapping	0	4.11961	2.30159	4.70014	3.80038	3.7556	3.41048	4.12213	3.605	3.59429	3.93098	5.56671	5.92393	5.82372	5.64757	5.88755	5.24849	4.0843	3.81891	3.2074	3.68157
Shkbp1	7	27342133	27356019	-	0.00768838	Shkbp1	ENSMUSG00000089832	Sh3kbp1 binding protein 1 [Source:MGI Symbol;Acc:MGI:2385803]	gene	overlapping	0	0.757042	4.28709	2.61715	3.83013	2.59266	3.48593	4.62557	3.04206	5.03416	4.52027	4.34215	5.60439	5.4956	4.80134	5.65737	5.72878	6.12669	3.71763	3.7325	5.07846
2410127L17Rik	19	18670780	18704788	+	0.00260607	2410127L17Rik	ENSMUSG00000024726	RIKEN cDNA 2410127L17 gene [Source:MGI Symbol;Acc:MGI:1914633]	gene	overlapping	0	3.73105	6.29436	3.41362	5.01416	3.60826	4.62176	2.89974	4.87725	5.71899	3.67572	6.40165	6.14701	4.93944	6.02676	5.86996	5.71154	6.90857	6.44802	4.61804	6.65854
Gnb1	4	155491361	155559269	+	3.63044e-11	Gnb1	ENSMUSG00000029064	guanine nucleotide binding protein (G protein), beta 1 [Source:MGI Symbol;Acc:MGI:95781]	gene	overlapping	0	6.35483	7.39751	5.81631	6.41509	6.13519	5.61967	6.03219	5.84002	5.83659	6.65227	7.77229	7.28451	7.86709	7.23449	7.7652	7.21012	8.42595	7.4822	7.22851	7.73236
Dab2	15	6299788	6440712	+	0.0260271	Dab2	ENSMUSG00000022150	disabled homolog 2 (Drosophila) [Source:MGI Symbol;Acc:MGI:109175]	gene	overlapping	0	4.57904	5.84261	0.539152	6.15598	4.87646	6.08309	5.58588	6.03384	7.06582	5.81252	7.33644	5.19728	6.02253	7.39775	6.18656	7.97565	8.43376	5.4793	6.89334	7.09931
Mri1	8	84249906	84257326	-	0.0168078	Mri1	ENSMUSG00000004996	methylthioribose-1-phosphate isomerase homolog (S. cerevisiae) [Source:MGI Symbol;Acc:MGI:1915123]	gene	overlapping	0	2.59354	1.90566	1.89279	2.82028	1.97599	0.776271	1.52123	2.86803	2.51183	3.67572	3.35725	5.12847	3.22323	0.0358024	4.50612	3.3185	4.32734	3.59448	2.62244	3.51884
Zfp644	5	106500894	106697287	-	0.00142248	Zfp644	ENSMUSG00000049606	zinc finger protein 644 [Source:MGI Symbol;Acc:MGI:1277212]	gene	overlapping	0	3.50428	6.73187	3.98394	5.7494	5.65782	4.29983	6.02797	5.77739	5.23601	5.86449	7.23786	6.94292	7.21737	6.57496	7.46081	4.85716	4.85527	7.55006	6.33769	7.40331
Deptor	15	55112317	55259271	+	7.35507e-07	Deptor	ENSMUSG00000022419	DEP domain containing MTOR-interacting protein [Source:MGI Symbol;Acc:MGI:2146322]	gene	overlapping	0	4.35908	6.93153	5.08347	5.87601	5.10802	4.73434	6.03219	6.18254	5.68176	4.596	6.84643	6.86419	6.79092	6.84187	6.54175	7.08849	7.57821	6.85959	6.69534	7.51951
Gm949	18	46925982	46934222	+	0.00248774	Gm949	ENSMUSG00000073568	predicted gene 949 [Source:MGI Symbol;Acc:MGI:2685795]	gene	overlapping	0	4.39263	5.74519	3.59805	5.09398	1.31703	3.82793	4.16893	4.61605	5.2782	5.61635	6.33453	6.40492	6.03059	6.3703	5.33287	7.00603	5.53528	5.99696	4.43481	5.87481
Nagk	6	83794982	83803420	+	0.000395798	Nagk	ENSMUSG00000034744	N-acetylglucosamine kinase [Source:MGI Symbol;Acc:MGI:1860418]	gene	overlapping	0	4.65013	3.54037	3.61715	4.09806	1.46142	3.87079	3.34226	3.73238	3.86177	4.22403	5.57319	4.11179	4.69115	4.1485	5.71105	5.19572	6.21698	5.27612	3.96533	4.68637
Zcchc11	4	108459426	108559421	+	0.0224324	Zcchc11	ENSMUSG00000034610	zinc finger, CCHC domain containing 11 [Source:MGI Symbol;Acc:MGI:2445126]	gene	overlapping	0	3.37595	2.70213	3.25187	2.5612	3.46142	2.82067	3.49698	3.25506	2.86177	3.56283	5.70893	-3.31447	3.96767	4.73068	3.99155	5.29167	4.96717	4.16509	3.99281	3.43003
Elmo2	2	165288031	165326479	-	0.0271906	Elmo2	ENSMUSG00000017670	engulfment and cell motility 2, ced-12 homolog (C. elegans) [Source:MGI Symbol;Acc:MGI:2153045]	gene	overlapping	0	2.59354	3.78701	3.32342	2.46335	2.95175	3.08613	3.98938	2.38998	0.00933021	2.18096	1.67918	4.8704	4.02253	4.9618	2.10619	2.97746	2.98854	5.99155	4.45471	3.27293
Cdk17	10	93160876	93241342	+	0.0162586	Cdk17	ENSMUSG00000020015	cyclin-dependent kinase 17 [Source:MGI Symbol;Acc:MGI:97517]	gene	overlapping	0	-0.46535	2.24269	2.53915	3.90658	2.76954	1.7459	3.2582	4.29688	4.73422	3.6123	4.72649	4.9382	3.20437	4.92333	3.08601	5.36335	5.48102	4.50612	4.72432	4.33539
Foxo3	10	42181841	42276755	-	1.64872e-15	Foxo3	ENSMUSG00000048756	forkhead box O3 [Source:MGI Symbol;Acc:MGI:1890081]	gene	overlapping	0	5.4009	5.96151	4.99128	4.90192	5.99984	5.15709	5.50916	5.72729	5.70359	5.92447	7.59087	6.94527	6.5545	7.1222	6.89482	6.97866	7.02002	6.19836	6.3903	6.73352
Foxn2	17	88440711	88490533	+	0.0031924	Foxn2	ENSMUSG00000034998	forkhead box N2 [Source:MGI Symbol;Acc:MGI:1347478]	gene	overlapping	0	5.00497	6.60318	4.93147	5.53434	7.38652	5.52223	6.23639	4.91355	6.12249	4.01921	7.9987	6.56511	5.31839	7.31564	5.48701	7.37617	7.00786	8.16629	7.05116	7.69592
Cnpy2	10	128322459	128327187	+	0.0164214	Cnpy2	ENSMUSG00000025381	canopy 2 homolog (zebrafish) [Source:MGI Symbol;Acc:MGI:1928477]	gene	overlapping	0	4.5496	3.05005	2.65463	0.330898	3.7556	3.84952	3.1993	2.75256	4.01931	3.75128	3.387	5.59842	5.24185	5.51801	4.15544	1.95809	5.15532	5.48701	4.37341	3.84507
Anxa9	3	95296096	95307176	-	0.0285055	Anxa9	ENSMUSG00000015702	annexin A9 [Source:MGI Symbol;Acc:MGI:1923711]	gene	overlapping	0	1.27162	1.82766	1.45669	1.53735	2.79702	2.42013	2.07377	1.48952	2.33126	2.09076	2.57965	2.00746	2.38271	2.26846	2.2582	3.93846	5.27612	1.93627	1.55029	3.78367
6230427J02Rik	9	107984227	107985879	-	0.00286576	6230427J02Rik	ENSMUSG00000042106	RIKEN cDNA 6230427J02 gene [Source:MGI Symbol;Acc:MGI:1915426]	gene	overlapping	0	2.47325	5.48428	5.27009	5.00115	5.76607	5.3283	5.36253	5.02557	3.65958	5.00693	5.52718	6.94056	7.5225	7.07582	6.5909	4.53	5.12347	6.71763	5.23643	5.32311
Abhd15	11	77515121	77538607	+	1.27949e-06	Abhd15	ENSMUSG00000000686	abhydrolase domain containing 15 [Source:MGI Symbol;Acc:MGI:1914727]	gene	overlapping	0	1.27162	1.90566	2.36923	1.3309	1.87646	1.0982	2.00666	0.58263	1.7936	1.52888	3.02022	3.78356	2.7378	2.52123	3.22167	3.05242	2.70843	2.76916	2.45471	2.82779
Tbx3	5	119670669	119684724	+	0.00820465	Tbx3	ENSMUSG00000018604	T-box 3 [Source:MGI Symbol;Acc:MGI:98495]	gene	overlapping	0	6.91835	5.57062	6.16364	6.98581	3.49537	6.82793	4.68043	6.62702	8.16246	7.69499	9.14461	8.19827	7.9373	7.91477	6.867	8.23799	8.44797	7.19836	7.46824	8.22959
Palm3	8	84021471	84030295	+	0.0102512	Palm3	ENSMUSG00000047986	paralemmin 3 [Source:MGI Symbol;Acc:MGI:1921587]	gene	overlapping	0	-2.20232	3.88655	4.34651	3.46335	3.0691	4.1455	4.52123	3.38998	3.59429	4.20266	4.84911	4.22469	6.06235	4.89378	5.23548	5.39969	5.8475	4.58012	3.89425	3.92848
Kctd9	14	67715937	67742310	+	0.0128983	Kctd9	ENSMUSG00000034327	potassium channel tetramerisation domain containing 9 [Source:MGI Symbol;Acc:MGI:2145579]	gene	overlapping	0	-2.05031	6.26506	5.38045	5.17735	5.3312	5.70108	2.97189	5.23368	4.56733	4.66795	6.70007	5.93583	5.84823	6.13594	5.70114	6.13018	7.33848	6.7739	6.16273	6.37012
Col9a3	2	180597790	180622189	+	0.0365157	Col9a3	ENSMUSG00000027570	collagen, type IX, alpha 3 [Source:MGI Symbol;Acc:MGI:894686]	gene	overlapping	0	1.40912	2.86718	-0.308845	2.63046	0.239028	-0.34926	0.784264	2.97495	2.56733	2.96946	1.77229	2.24012	4.32277	2.35773	2.32858	3.36335	4.5735	3.58012	3.05931	3.48617
Vps33b	7	80269649	80291579	+	0.000436446	Vps33b	ENSMUSG00000030534	vacuolar protein sorting 33B (yeast) [Source:MGI Symbol;Acc:MGI:2446237]	gene	overlapping	0	4.59354	3.46509	5.75724	5.69385	4.24901	4.33086	4.54508	4.98351	6.05129	5.57536	6.92458	5.66567	5.81443	6.20773	5.37506	7.33735	7.27031	6.27166	5.44728	6.26332
Stk31	6	49395604	49469501	+	0.00344034	Stk31	ENSMUSG00000023403	serine threonine kinase 31 [Source:MGI Symbol;Acc:MGI:1924735]	gene	overlapping	0	3.30724	4.65773	4.20212	4.40525	4.60826	4.76116	3.95419	3.90456	4.13403	5.15893	6.52384	5.93108	3.06497	6.45028	2.84316	5.53327	5.83575	5.59448	4.97225	6.25849
Nme4	17	26091734	26095508	-	0.000270577	Nme4	ENSMUSG00000024177	NME/NM23 nucleoside diphosphate kinase 4 [Source:MGI Symbol;Acc:MGI:1931148]	gene	overlapping	0	4.7441	4.11716	4.57868	4.28151	4.12439	3.76116	2.2582	2.83056	4.23172	5.63641	5.50021	5.34374	5.43218	5.8224	5.54729	5.82812	6.3822	5.53246	4.65291	5.43574
Amn1	6	149157147	149188712	-	0.0339269	Amn1	ENSMUSG00000068250	antagonist of mitotic exit network 1 homolog (S. cerevisiae) [Source:MGI Symbol;Acc:MGI:2442933]	gene	overlapping	0	-0.0503126	3.86718	4.21472	4.94787	0.239028	5.15131	4.63671	3.28307	5.30701	4.44035	6.56995	5.92393	5.55636	5.40387	5.29821	5.82546	5.11702	5.61926	4.48889	5.19084
Hook2	8	84990595	85003364	+	0.00827902	Hook2	ENSMUSG00000052566	hook homolog 2 (Drosophila) [Source:MGI Symbol;Acc:MGI:2181664]	gene	overlapping	0	1.40912	0.979659	4.38045	4.47595	3.47849	4.2357	4.3957	4.38999	4.13403	3.56283	5.04842	5.03868	3.26023	4.01766	5.99966	5.93599	5.95274	4.84316	4.41971	5.13223
Ppdpf	2	181187247	181188771	+	0.000133383	Ppdpf	ENSMUSG00000016344	pancreatic progenitor cell differentiation and proliferation factor homolog (zebrafish)RIKEN cDNA 2700038C09 gene [Source:MGI Symbol;Acc:MGI:1913746]	gene	overlapping	0	5.09943	4.27244	3.27612	4.87363	3.87646	3.9661	3.97189	3.28307	3.55365	4.14779	5.44472	5.66567	5.7638	5.23744	6.03166	4.48335	6.30196	5.27166	4.02644	4.64751
Ptpmt1	2	90910713	90918258	-	0.00796687	Ptpmt1	ENSMUSG00000063235	protein tyrosine phosphatase, mitochondrial 1 [Source:MGI Symbol;Acc:MGI:1913711]	gene	overlapping	0	3.27162	3.63501	4.23959	4.61914	3.82399	3.7382	3.49698	3.22649	3.78192	5.26585	5.27214	6.07999	5.67754	5.56562	1.18419	5.34855	5.97075	4.96417	3.76474	5.58974
Ocln	13	100496507	100552718	-	0.0150406	Ocln	ENSMUSG00000021638	occludin [Source:MGI Symbol;Acc:MGI:106183]	gene	overlapping	0	4.01578	5.25019	4.66385	6.46809	5.30272	5.24116	3.28676	3.04206	4.50474	5.86449	5.20692	5.43372	4.69791	6.17535	5.06555	7.15272	7.14107	6.26718	6.4448	7.47025
Rassf8	6	145746748	145821079	+	0.0129724	Rassf8	ENSMUSG00000030259	Ras association (RalGDS/AF-6) domain family (N-terminal) member 8 [Source:MGI Symbol;Acc:MGI:1918573]	gene	overlapping	0	3.78258	3.99758	4.69115	4.43781	4.03489	4.28407	4.31478	4.35081	3.80519	4.65227	4.28009	3.82508	4.6075	5.83022	2.3957	6.57836	7.3564	4.78802	4.60028	5.07846
Ap3s1	18	46741917	46790826	+	0.00109282	Ap3s1	ENSMUSG00000024480	adaptor-related protein complex 3, sigma 1 subunit [Source:MGI Symbol;Acc:MGI:1337062]	gene	overlapping	0	4.28954	6.78959	4.55905	3.90658	3.76954	4.38113	4.1379	3.88641	4.51889	4.14779	5.96212	4.95232	5.4523	6.39862	6.22629	5.69408	6.9345	6.41605	4.96533	6.30137
Pgp	17	24470473	24471591	+	3.94335e-05	Pgp	ENSMUSG00000043445	phosphoglycolate phosphatase [Source:MGI Symbol;Acc:MGI:1914328]	gene	overlapping	0	4.75704	5.94313	6.29404	4.78021	4.71296	3.97267	3.54508	5.30373	4.77604	5.42658	6.76664	6.90712	6.89161	6.68972	6.91068	5.97986	6.34954	5.99426	4.72432	5.8103
Grk6	13	55445334	55460925	+	0.01121	Grk6	ENSMUSG00000074886	G protein-coupled receptor kinase 6 [Source:MGI Symbol;Acc:MGI:1347078]	gene	overlapping	0	4.79518	3.46509	4.66385	4.75974	4.91459	4.79493	4.83351	5.07448	5.53289	5.56702	6.36475	5.80447	5.24646	2.66807	4.96969	7.27709	7.78168	5.73068	5.26489	5.72655
Pppde1	1	178187417	178252598	+	0.0246798	Pppde1	ENSMUSG00000026502	PPPDE peptidase domain containing 1 [Source:MGI Symbol;Acc:MGI:1926075]	gene	overlapping	0	-2.20232	4.60025	2.45669	4.37865	4.26877	3.67512	4.2582	2.28307	4.15229	2.34602	4.69115	4.44042	5.51869	5.56562	4.78802	4.80392	5.33848	4.58732	4.12287	5.06746
Lgals9	11	78962974	78984946	-	0.00770352	Lgals9	ENSMUSG00000001123	lectin, galactose binding, soluble 9 [Source:MGI Symbol;Acc:MGI:109496]	gene	overlapping	0	5.86855	3.86718	2.69115	4.02278	3.19839	2.27877	4.18419	3.55991	4.50474	5.42197	4.77229	5.52158	4.91645	5.79602	6.12362	5.73163	6.52069	5.90493	4.22489	5.2951
2007-03-01	2	60209887	60250676	+	0.00529227	2007-03-01	ENSMUSG00000026977	membrane-associated ring finger (C3HC4) 7 [Source:MGI Symbol;Acc:MGI:1931053]	gene	overlapping	0	5.46539	5.79728	2.98394	4.84478	5.5769	4.93614	5.11419	4.54841	4.3863	3.90475	5.50021	5.55897	6.16833	5.81716	5.20773	4.78756	5.1803	7.57832	5.43231	7.51142
Epn1	7	5080235	5098178	+	0.000994696	Epn1	ENSMUSG00000035203	epsin 1 [Source:MGI Symbol;Acc:MGI:1333763]	gene	overlapping	0	2.90388	3.30159	3.76154	2.5612	2.0233	3.01149	2.1993	3.41552	3.89469	2.94392	2.77229	4.97555	4.67069	3.62077	5.21704	4.8201	4.90857	3.14572	3.34171	4.01499
D11Wsu47e	11	113684412	113694647	+	0.00611624	D11Wsu47e	ENSMUSG00000041623	DNA segment, Chr 11, Wayne State University 47, expressed [Source:MGI Symbol;Acc:MGI:106356]	gene	overlapping	0	3.88042	-0.0203406	4.99128	4.16962	4.19839	4.72269	4.28676	3.51337	4.06822	4.52027	5.03908	6.50571	5.6039	5.04926	4.5137	5.41398	5.98145	5.44009	3.74062	5.2888
Slc24a5	2	125068124	125088677	+	0.038493	Slc24a5	ENSMUSG00000035183	solute carrier family 24, member 5 [Source:MGI Symbol;Acc:MGI:2677271]	gene	overlapping	0	3.30724	3.41262	2.53915	4.3447	3.33589	3.82066	3.28676	3.53683	4.47603	3.93098	3.85975	3.91435	3.80193	2.8838	2.2582	3.20807	4.88597	6.20305	5.63993	6.49578
Tcp11l1	2	104657288	104712169	-	0.0303599	Tcp11l1	ENSMUSG00000027175	t-complex 11 like 1 [Source:MGI Symbol;Acc:MGI:2444263]	gene	overlapping	0	0.949688	2.18129	0.828658	3.47595	3.59266	-0.0013365	2.97189	1.58263	1.83941	1.13657	2.98174	3.38597	3.314	4.54676	4.44406	2.1749	3.75906	3.32858	2.69115	3.05266
Gm5434	12	36090379	36091829	+	0.0467938	Gm5434	ENSMUSG00000059301	predicted gene 5434 [Source:MGI Symbol;Acc:MGI:3646221]	gene	overlapping	0	0.271616	0.657731	1.27612	2.5131	1.87646	0.361234	0.784264	1.58263	-0.160595	1.13657	2.57965	1.81481	3.14627	3.87375	1.32858	2.53	2.01655	2.3957	-0.927756	2.23411
Gm17066	14	105109390	105114676	-	0.00837333	Gm17066	ENSMUSG00000091509	predicted gene 17066 [Source:MGI Symbol;Acc:MGI:4937893]	gene	overlapping	0	0.757042	4.084	2.53915	3.73898	3.23903	2.04929	3.1993	2.83056	1.7463	3.0673	4.21523	3.34374	2.71133	3.48206	2.66419	4.42107	4.78372	4.15544	4.53168	5.46956
4930583H14Rik	3	51388415	51396738	-	0.000466964	4930583H14Rik	ENSMUSG00000037161	RIKEN cDNA 4930583H14 gene [Source:MGI Symbol;Acc:MGI:1914999]	gene	overlapping	0	4.35908	5.35122	3.01308	4.14616	5.43543	5.8743	5.56271	4.36399	5.33526	4.94392	5.91184	6.98703	5.74435	6.67243	6.50612	5.51351	5.79993	6.4793	5.51044	6.58589
Gna11	10	81528724	81545190	-	0.00232147	Gna11	ENSMUSG00000034781	guanine nucleotide binding protein, alpha 11 [Source:MGI Symbol;Acc:MGI:95766]	gene	overlapping	0	6.41321	4.28709	3.15059	4.28151	3.98797	4.92602	4.62557	3.69115	4.52591	4.55442	5.69115	6.02983	6.43218	4.32858	5.29821	6.50353	6.1616	6.21472	5.84797	5.85789
Pdlim7	13	55495795	55513676	-	0.00922534	Pdlim7	ENSMUSG00000021493	PDZ and LIM domain 7 [Source:MGI Symbol;Acc:MGI:1914649]	gene	overlapping	0	4.83233	2.78701	1.76154	4.18505	3.04638	2.68316	3.84316	2.94018	3.73422	3.96946	4.73808	5.82252	3.87531	5.39335	4.79425	4.86758	5.55929	2.74362	4.17778	4.08211
Sik3	9	46012820	46224194	+	0.00111797	Sik3	ENSMUSG00000034135	SIK family kinase 3 [Source:MGI Symbol;Acc:MGI:2446296]	gene	overlapping	0	4.03715	4.16553	6.22721	5.57297	5.24403	5.48593	5.77421	5.14487	4.94793	5.99143	6.85178	4.12016	6.12386	5.75827	6.59269	7.72018	6.88217	6.08855	6.38123	7.25527
Gnai2	9	107614138	107635342	-	2.90057e-07	Gnai2	ENSMUSG00000032562	guanine nucleotide binding protein (G protein), alpha inhibiting 2 [Source:MGI Symbol;Acc:MGI:95772]	gene	overlapping	0	6.04772	4.50322	4.59805	4.65283	5.34523	4.7459	4.64776	5.06645	5.33925	5.39395	6.16461	5.82508	5.9981	6.37743	6.15544	6.92481	6.97611	6.56562	5.72841	6.00157
Reep3	10	67009189	67096988	-	0.0031924	Reep3	ENSMUSG00000019873	receptor accessory protein 3 [Source:MGI Symbol;Acc:MGI:88930]	gene	overlapping	0	5.26257	2.35817	2.86108	3.61914	5.21376	4.68716	4.69115	3.84942	4.63382	5.08493	6.04375	5.37553	5.98987	6.19365	5.65394	5.80392	6.36868	4.04479	5.04297	5.3045
Rfxap	3	54803116	54807791	-	0.0287976	Rfxap	ENSMUSG00000036615	regulatory factor X-associated protein [Source:MGI Symbol;Acc:MGI:2180854]	gene	overlapping	0	3.37595	6.23893	4.18941	3.5131	3.81057	3.42971	0.421694	3.36399	2.59429	3.40335	5.10321	5.41685	6.04656	5.92089	5.40794	4.378	5.02347	5.99426	4.08507	3.45275
Tcf12	9	71844252	72111819	-	0.0359518	Tcf12	ENSMUSG00000032228	transcription factor 12 [Source:MGI Symbol;Acc:MGI:101877]	gene	overlapping	0	3.62211	0.242694	5.90061	5.16962	3.76954	3.43924	3.82379	3.84942	4.57411	5.34602	3.70303	4.42024	5.5489	4.15682	5.37921	5.87792	6.20181	7.01708	5.82904	6.04334
Asf1a	10	53596961	53609213	+	0.0291096	Asf1a	ENSMUSG00000019857	ASF1 anti-silencing function 1 homolog A (S. cerevisiae) [Source:MGI Symbol;Acc:MGI:1913653]	gene	overlapping	0	4.90388	6.58551	4.47775	4.02278	3.78335	1.2357	1.07377	4.00889	4.49762	4.85081	6.28009	6.33837	6.57483	5.40736	4.71763	5.47656	4.46586	6.32858	5.29003	6.08575
E2f6	12	16810965	16826743	+	0.00477571	E2f6	ENSMUSG00000057469	E2F transcription factor 6 [Source:MGI Symbol;Acc:MGI:1354159]	gene	overlapping	0	2.65013	2.41262	5.04871	3.7494	5.46142	4.01786	4.21425	4.52514	4.40165	5.8814	4.59247	5.85796	5.14627	5.35412	6.36672	6.02476	5.985	6.33715	4.91235	6.18576
Gm10479	12	20415938	20433699	+	0.0245468	Gm10479	ENSMUSG00000073184	predicted gene 10479 [Source:MGI Symbol;Acc:MGI:3704385]	gene	overlapping	0	0.271616	1.11716	1.76154	0.437813	-0.930898	0.361234	0.421694	1.16759	0.00933021	1.78042	1.09422	1.27049	1.27837	2.07143	-0.47877	3.08849	2.8707	2.52123	1.58682	2.28564
Reep4	14	70545251	70548933	+	0.0221694	Reep4	ENSMUSG00000033589	receptor accessory protein 4 [Source:MGI Symbol;Acc:MGI:1919799]	gene	overlapping	0	2.75704	3.27244	5.02028	4.90658	3.60826	3.46743	1.86227	2.86803	4.7936	3.596	3.77229	6.27049	2.68437	5.2177	5.06039	5.07956	5.37681	4.95308	4.31474	5.83213
Gtsf1l	2	163087038	163087783	-	0.047653	Gtsf1l	ENSMUSG00000070708	gametocyte specific factor 1-like [Source:MGI Symbol;Acc:MGI:1915486]	gene	overlapping	0	-2.20232	2.51571	2.17658	3.57297	3.1135	3.7459	3.10619	2.04206	3.77014	3.09076	2.57965	4.91915	4.71133	3.83282	3.29382	4.24849	4.36051	4.94749	3.05931	4.06746
Ddah2	17	35059035	35062095	+	0.00901132	Ddah2	ENSMUSG00000007039	dimethylarginine dimethylaminohydrolase 2 [Source:MGI Symbol;Acc:MGI:1859016]	gene	overlapping	0	4.88042	5.16553	3.57868	2.82028	4.31703	4.1455	4.56854	4.36399	5.33925	5.48971	5.28799	5.47343	5.35732	6.77322	5.93062	6.33735	6.74448	2.76916	6.04461	4.40695
Ing3	6	21949571	21976038	+	0.000363272	Ing3	ENSMUSG00000029670	inhibitor of growth family, member 3 [Source:MGI Symbol;Acc:MGI:1919027]	gene	overlapping	0	3.70457	4.54037	2.89279	3.08989	4.48696	3.60916	4.1379	4.07448	4.48326	3.54596	5.50021	4.35087	5.62887	4.75279	5.15544	4.1749	3.46586	5.62975	5.06579	6.03583
Fgfr1	8	25513654	25575714	+	0.000151087	Fgfr1	ENSMUSG00000031565	fibroblast growth factor receptor 1 [Source:MGI Symbol;Acc:MGI:95522]	gene	overlapping	0	5.15914	4.93386	7.18461	6.30112	6.76433	5.83697	5.63115	5.8018	6.01931	5.07908	6.66408	6.35619	6.78458	6.78935	7.40285	8.16438	7.68134	6.3957	7.69743	7.2068
Tnrc6c	11	117654289	117763439	+	0.0436541	Tnrc6c	ENSMUSG00000025571	trinucleotide repeat containing 6C [Source:MGI Symbol;Acc:MGI:2443265]	gene	overlapping	0	1.75704	3.82766	2.12411	3.3309	4.72015	4.49965	4.12213	2.44061	1.7936	3.6123	4.02022	5.75431	4.21383	5.56562	4.3709	5.20807	3.79185	1.63671	4.52698	5.26653
Nqo2	13	33964659	33988465	+	0.0373244	Nqo2	ENSMUSG00000046949	NAD(P)H dehydrogenase, quinone 2 [Source:MGI Symbol;Acc:MGI:104513]	gene	overlapping	0	4.65013	-2.49427	4.5884	4.59624	3.17763	4.08613	5.14572	4.29688	3.00933	3.78042	5.47273	5.49288	3.65688	5.10619	4.77547	5.50353	6.0909	4.47543	4.99281	6.1375
Cds1	5	101765130	101823858	+	0.000669633	Cds1	ENSMUSG00000029330	CDP-diacylglycerol synthase 1 [Source:MGI Symbol;Acc:MGI:1921846]	gene	overlapping	0	4.96091	6.80239	3.93908	5.10619	4.83729	4.1743	4.7018	5.62702	4.28235	5.8814	5.63027	5.92632	6.53765	6.47376	6.84766	6.77793	7.56523	5.79735	5.64859	6.36863
Chd2	7	73426691	73541746	-	0.02592	Chd2	ENSMUSG00000078671	chromodomain helicase DNA binding protein 2 [Source:MGI Symbol;Acc:MGI:2448567]	gene	overlapping	0	3.30724	4.27244	1.89279	0.215421	3.37288	3.61757	2.52123	2.62702	2.64676	3.70642	2.98174	4.9663	5.22323	4.26077	4.79425	4.10619	2.01655	4.72417	2.80405	4.46956
Angptl4	17	33773750	33781575	-	0.0334977	Angptl4	ENSMUSG00000002289	angiopoietin-like 4 [Source:MGI Symbol;Acc:MGI:1888999]	gene	overlapping	0	4.30724	4.43909	5.47251	3.83991	5.04638	4.91923	3.52123	3.88641	3.60759	4.19185	0.0942192	6.76901	4.74435	5.19365	6.10869	4.47656	5.01655	6.85065	5.80405	4.98803
Gfer	17	24693191	24696156	-	1.77602e-05	Gfer	ENSMUSG00000040888	growth factor, erv1 (S. cerevisiae)-like (augmenter of liver regeneration) [Source:MGI Symbol;Acc:MGI:107757]	gene	overlapping	0	3.50428	6.3547	5.81631	5.29934	5.59266	4.64252	5.2068	6.07047	4.96869	5.19726	7.05074	7.01196	6.95362	6.80001	7.15301	5.94831	6.51087	6.5638	5.30928	5.8103
Chic2	5	75001026	75044774	-	0.00704537	Chic2	ENSMUSG00000029229	cysteine-rich hydrophobic domain 2 [Source:MGI Symbol;Acc:MGI:1921527]	gene	overlapping	0	0.757042	6.32662	5.29404	4.5131	5.03489	4.33086	3.74362	5.19734	4.15229	5.92773	5.82214	6.83146	6.37851	6.52605	5.83713	5.5398	6.51824	6.07069	4.98599	6.59613
Gmfb	14	46808149	46822242	-	0.02592	Gmfb	ENSMUSG00000062014	glia maturation factor, beta [Source:MGI Symbol;Acc:MGI:1927133]	gene	overlapping	0	2.27162	5.25019	3.55905	4.46966	3.83729	5.11315	4.82379	4.99202	5.09207	5.37497	5.89641	5.27049	2.20437	5.37921	4.71763	5.14524	5.60152	7.21006	6.36555	6.71602
Glis2	16	4594713	4624924	+	0.00193634	Glis2	ENSMUSG00000014303	GLIS family zinc finger 2 [Source:MGI Symbol;Acc:MGI:1932535]	gene	overlapping	0	3.11961	5.25019	4.62661	4.35838	5.12439	5.20812	5.06555	4.86803	5.63707	4.76592	5.24802	5.27799	6.48588	6.55936	7.41807	6.28392	5.45567	6.17228	5.2074	4.41853
Lin28a	4	134003330	134018841	-	0.00528045	Lin28a	ENSMUSG00000050966	lin-28 homolog A (C. elegans) [Source:MGI Symbol;Acc:MGI:1890546]	gene	overlapping	0	4.09943	3.72382	3.47775	4.54335	4.92085	3.53116	4.09007	4.18254	4.95315	5.47642	6.387	3.80447	6.30296	5.4721	4.33715	5.99894	5.60152	4.24915	4.91235	6.44285
Gmcl1	6	86691768	86733378	-	0.0441627	Gmcl1	ENSMUSG00000001157	germ cell-less homolog 1 (Drosophila) [Source:MGI Symbol;Acc:MGI:1345156]	gene	overlapping	0	3.83233	4.65773	3.47775	4.82522	2.42665	4.63839	2.86227	3.75256	3.98915	4.58778	0.357254	4.64553	5.72463	3.54676	5.00236	5.38164	5.70413	6.58732	5.29831	4.92036
2310061I04Rik	17	35892677	35897431	-	0.00927707	2310061I04Rik	ENSMUSG00000050705	RIKEN cDNA 2310061I04 gene [Source:MGI Symbol;Acc:MGI:1916912]	gene	overlapping	0	1.85658	4.90566	3.25187	3.61914	3.83729	2.40076	2.65873	4.28307	4.33126	4.10235	4.93216	3.86544	5.54516	4.62076	2.84316	4.9434	6.1331	5.49086	4.5641	4.11809
Mrpl21	19	3282901	3292837	+	1.59073e-21	Mrpl21	ENSMUSG00000024829	mitochondrial ribosomal protein L21 [Source:MGI Symbol;Acc:MGI:2660674]	gene	overlapping	0	5.8262	5.66896	5.97285	5.6163	6.04065	5.24659	6.19177	5.71706	5.49046	5.96946	7.6036	6.8617	6.9981	6.93546	7.13348	6.81069	7.28046	6.79735	6.14753	6.55866
Gtf2ird1	5	134357669	134456716	-	0.0191954	Gtf2ird1	ENSMUSG00000023079	general transcription factor II I repeat domain-containing 1 [Source:MGI Symbol;Acc:MGI:1861942]	gene	overlapping	0	3.47325	3.51571	4.87702	3.95239	3.5769	4.37122	4.16893	2.90456	5.57411	4.89812	4.71481	5.70512	3.68437	4.14014	4.33715	6.89966	6.36051	5.11119	5.25641	5.62518
Txndc17	11	72207547	72210015	+	0.0183329	Txndc17	ENSMUSG00000020803	thioredoxin domain containing 17 [Source:MGI Symbol;Acc:MGI:1289248]	gene	overlapping	0	4.15914	3.88655	5.49851	4.45064	2.82399	4.19693	1.78426	3.13722	4.04886	5.51594	6.34972	5.86046	5.69454	6.1692	4.09614	4.24849	3.97433	5.42411	5.46946	5.42142
D1Bwg0212e	1	39534992	39546881	+	3.83358e-06	D1Bwg0212e	ENSMUSG00000003135	DNA segment, Chr 1, Brigham & Women's Genetics 0212 expressed [Source:MGI Symbol;Acc:MGI:106580]	gene	overlapping	0	4.59354	5.66336	4.17658	5.5671	4.15656	5.125	4.71237	4.73238	5.59095	5.79478	6.63957	6.42024	6.15857	6.43839	6.53432	6.23648	6.05758	5.89337	5.48889	6.57299
Pdcd5	7	35641982	35647521	-	0.00948962	Pdcd5	ENSMUSG00000030417	programmed cell death 5 [Source:MGI Symbol;Acc:MGI:1913538]	gene	overlapping	0	4.34201	5.37883	3.41362	4.28151	2.65407	2.6991	1.86227	3.79208	4.14319	4.47642	5.64266	5.64553	4.77662	6.05595	4.42812	4.95809	5.66484	3.47543	4.07867	5.13223
Chmp4b	2	154651705	154694785	+	0.00101202	Chmp4b	ENSMUSG00000038467	charged multivesicular body protein 4B [Source:MGI Symbol;Acc:MGI:1922858]	gene	overlapping	0	2.75704	5.66896	4.11069	4.09806	3.31703	3.42013	3.76409	4.09042	3.98915	4.43119	5.67316	5.50251	6.4543	5.31006	5.3499	5.35966	4.70843	3.92495	4.50329	4.97239
Tprgl	4	154157485	154160666	-	0.000602079	Tprgl	ENSMUSG00000029030	transformation related protein 63 regulated like [Source:MGI Symbol;Acc:MGI:1915058]	gene	overlapping	0	4.50428	5.88173	5.74427	5.92508	4.64653	5.52223	4.79425	5.02557	6.33126	6.13092	5.89123	4.91435	6.83603	6.6637	6.5137	7.08291	7.68353	7.23089	6.39288	6.44285
Txnrd1	10	82859206	82897724	+	0.0031924	Txnrd1	ENSMUSG00000020250	thioredoxin reductase 1 [Source:MGI Symbol;Acc:MGI:1354175]	gene	overlapping	0	4.50428	4.79728	3.72678	4.1303	6.59266	4.11612	5.29382	4.18254	5.50829	4.70642	5.36475	6.04088	6.53953	6.518	6.65051	5.30706	5.6199	6.81432	5.6334	6.06746
Gm16731	4	46535901	46539802	+	0.0489769	Gm16731	ENSMUSG00000085990	predicted gene, 16731 [Source:MGI Symbol;Acc:MGI:4439655]	gene	overlapping	0	2.11961	1.90566	-0.0458109	0.330898	0.528534	1.27877	0.421694	1.48952	1.59429	1.13657	2.09422	2.87535	-3.04356	2.07143	1.74362	2.89839	2.93082	2.84316	1.99281	2.6025
Taok1	11	77529162	77607815	-	7.25205e-09	Taok1	ENSMUSG00000017291	TAO kinase 1 [Source:MGI Symbol;Acc:MGI:1914490]	gene	overlapping	0	6.78574	8.87811	8.21863	8.03027	7.99614	7.73095	8.23639	8.07948	7.9674	7.81868	9.61857	9.24515	8.79131	9.17535	8.25763	9.36059	8.50717	9.47591	9.10586	9.65242
Slc25a39	11	102402985	102407946	-	0.00254065	Slc25a39	ENSMUSG00000018677	solute carrier family 25, member 39 [Source:MGI Symbol;Acc:MGI:1196386]	gene	overlapping	0	5.60074	5.21232	4.50878	5.64169	5.14592	4.81702	4.89046	4.53683	4.69115	6.21071	5.99146	5.74352	5.7378	4.54676	6.80045	7.05698	7.70198	5.54729	5.86294	6.06377
Epb4.1l4b	4	56991972	57143437	-	0.00183382	Epb4.1l4b	ENSMUSG00000028434	erythrocyte protein band 4.1-like 4b [Source:MGI Symbol;Acc:MGI:1859149]	gene	overlapping	0	5.47325	6.76364	5.72678	5.58756	5.18804	5.43924	4.81401	6.92914	6.7657	6.37497	5.55365	6.29286	6.84823	7.72999	5.89916	7.60039	8.38624	7.01708	7.25215	7.18407
Tpm1	9	67022590	67049406	-	7.39805e-05	Tpm1	ENSMUSG00000032366	tropomyosin 1, alpha [Source:MGI Symbol;Acc:MGI:98809]	gene	overlapping	0	6.62564	5.54037	4.21472	5.68303	5.78335	6.3971	6.16893	5.57698	6.69583	6.93908	6.98174	7.01308	7.28287	7.39335	7.41706	7.49851	7.52557	6.87585	6.91953	7.36039
Dctpp1	7	127256959	127260709	-	0.000372115	Dctpp1	ENSMUSG00000042462	dCTP pyrophosphatase 1 [Source:MGI Symbol;Acc:MGI:1913672]	gene	overlapping	0	3.65013	4.90566	4.09715	5.06925	4.84389	3.87079	3.82379	3.79208	4.74027	5.41734	5.77792	5.34374	6.02522	5.26462	5.10117	5.30323	6.77144	4.95308	5.12598	5.82344
Pla2g12a	3	129878622	129895821	+	7.24228e-06	Pla2g12a	ENSMUSG00000027999	phospholipase A2, group XIIA [Source:MGI Symbol;Acc:MGI:1913600]	gene	overlapping	0	4.19761	5.88173	5.77437	4.9924	5.36372	4.42493	4.61434	5.99626	5.05372	6.08493	6.28799	6.21105	6.69623	6.9074	7.12238	6.1345	6.34678	6.67773	5.33367	6.42286
Oasl2	5	114896936	114912234	+	0.03693	Oasl2	ENSMUSG00000029561	2'-5' oligoadenylate synthetase-like 2 [Source:MGI Symbol;Acc:MGI:1344390]	gene	overlapping	0	5.44154	4.56462	2.32342	4.61914	2.65407	5.11315	4.28676	3.69115	5.35116	5.30649	6.19856	6.14905	6.02522	5.97832	4.09614	6.15591	6.32174	3.27612	5.11038	5.63266
Rala	13	17880575	17944239	-	0.000149584	Rala	ENSMUSG00000008859	v-ral simian leukemia viral oncogene homolog A (ras related) [Source:MGI Symbol;Acc:MGI:1927243]	gene	overlapping	0	4.28954	3.63501	4.09715	4.62481	4.24901	4.22473	5.09816	4.55991	4.69739	4.12525	5.83838	6.30391	6.02253	5.42812	6.05521	4.46974	4.52557	5.52872	4.34704	4.93657
Rcor2	19	7267325	7275225	+	0.000493468	Rcor2	ENSMUSG00000024968	REST corepressor 2 [Source:MGI Symbol;Acc:MGI:1859854]	gene	overlapping	0	5.04772	3.56462	4.59805	4.90658	6.07192	4.84595	5.58012	5.28999	5.33126	5.09657	5.37962	6.6029	5.6003	6.90863	6.64535	6.74158	6.2819	6.285	4.94437	5.82126
Eif2c2	15	73095844	73096684	-	2.14909e-06	Eif2c2	ENSMUSG00000093631	eukaryotic translation initiation factor 2C, 2 [Source:MGI Symbol;Acc:MGI:2446632]	gene	overlapping	0	4.85658	5.45215	6.10732	5.82768	4.72731	5.10719	4.98066	6.38029	5.99675	6.32886	6.95468	6.46853	6.51103	6.74316	6.77547	6.93103	7.53891	6.78645	5.83284	6.71602
Eif2c1	4	126435012	126468583	-	0.0139604	Eif2c1	ENSMUSG00000041530	eukaryotic translation initiation factor 2C, 1 [Source:MGI Symbol;Acc:MGI:2446630]	gene	overlapping	0	5.73105	2.35817	4.99128	5.0356	5.13519	5.08613	4.1535	4.55991	4.21444	5.43577	5.63648	3.92393	6.92799	5.49195	4.52872	6.54792	6.59456	5.5909	6.17328	5.91832
Setd5	6	113077365	113153435	+	0.00292071	Setd5	ENSMUSG00000034269	SET domain containing 5 [Source:MGI Symbol;Acc:MGI:1920145]	gene	overlapping	0	2.65013	5.43909	4.47775	4.21542	4.08033	4.62176	3.47232	3.81145	3.97896	4.42197	4.69115	4.57427	6.1011	5.35773	5.52498	5.56242	5.94182	5.68446	3.25357	5.18067
Ctbp1	5	33247724	33275004	-	1.08902e-05	Ctbp1	ENSMUSG00000037373	C-terminal binding protein 1 [Source:MGI Symbol;Acc:MGI:1201685]	gene	overlapping	0	4.91547	4.28709	5.17013	5.70192	4.05779	5.19131	5.29382	5.69115	5.56733	5.39395	6.11214	6.20713	5.23722	6.03129	6.39159	6.52836	7.07434	6.55282	5.90332	6.22093
9030624G23Rik	12	24044701	24096968	-	0.0390807	9030624G23Rik	ENSMUSG00000073158	RIKEN cDNA 9030624G23 gene [Source:MGI Symbol;Acc:MGI:1914058]	gene	overlapping	0	-0.0503126	1.11716	0.176581	0.952387	-0.345935	0.835165	1.52123	0.752555	0.539845	1.78042	2.02022	1.93346	1.20437	2.14014	-0.063733	2.2722	3.31611	1.63671	0.965329	1.58203
Zdhhc2	8	40423815	40510268	+	0.00223332	Zdhhc2	ENSMUSG00000039470	zinc finger, DHHC domain containing 2 [Source:MGI Symbol;Acc:MGI:1923452]	gene	overlapping	0	4.71787	3.82766	4.09715	4.82028	3.71296	4.81702	4.82379	3.10619	5.54331	4.34602	5.45177	5.96165	5.19006	5.7054	5.285	6.19365	6.39293	4.71105	4.57323	5.51614
Gm11924	4	30432112	30523783	+	0.0365401	Gm11924	ENSMUSG00000087180	predicted gene 11924 [Source:MGI Symbol;Acc:MGI:3649863]	gene	overlapping	0	-0.46535	-1.34227	-0.0458109	-0.562187	-0.930898	-0.638767	0.421694	-0.41737	-0.35324	-1.27847	0.942216	1.68553	0.12637	0.414314	0.636707	0.070568	0.12347	0.106192	-0.0346709	0.912181
Ctnnbip1	4	149518236	149566437	+	0.0412136	Ctnnbip1	ENSMUSG00000028988	catenin beta interacting protein 1 [Source:MGI Symbol;Acc:MGI:1915756]	gene	overlapping	0	3.53465	1.35817	4.18941	3.97919	2.85046	4.26277	4.1993	3.10619	3.28235	2.26585	3.70303	3.09492	4.97881	6.39159	4.45983	3.69115	4.41415	4.18419	3.84232	4.20764
Atpaf1	4	115784812	115818828	+	0.000193384	Atpaf1	ENSMUSG00000028710	ATP synthase mitochondrial F1 complex assembly factor 1 [Source:MGI Symbol;Acc:MGI:2180560]	gene	overlapping	0	4.5644	5.9009	6.67072	5.66938	4.5769	5.51098	4.89974	6.24441	6.28027	6.87635	7.10991	6.31853	6.62533	7.09	6.53989	7.35227	7.65597	7.27389	6.42097	6.92848
Klf4	4	55527143	55532466	-	2.87577e-05	Klf4	ENSMUSG00000003032	Kruppel-like factor 4 (gut) [Source:MGI Symbol;Acc:MGI:1342287]	gene	overlapping	0	4.69115	7.21615	7.72458	6.59335	6.28585	5.49509	6.96969	6.00048	6.62894	6.14499	7.86373	7.24777	7.79328	7.254	7.52966	7.80731	8.08347	7.64363	6.95663	8.01451
Mosc2	1	184813068	184846451	-	1.71008e-06	Mosc2	ENSMUSG00000073481	MOCO sulphurase C-terminal domain containing 2 [Source:MGI Symbol;Acc:MGI:1914497]	gene	overlapping	0	5.35057	6.06287	5.46726	5.41509	4.40002	4.78002	4.44723	5.94895	5.63382	5.86449	6.67617	7.18039	6.32931	6.80795	6.89482	6.09737	6.43506	6.16509	5.94261	5.98218
Mtdh	15	34082694	34142386	+	7.46145e-05	Mtdh	ENSMUSG00000022255	metadherin [Source:MGI Symbol;Acc:MGI:1914404]	gene	overlapping	0	4.15914	6.48745	5.84496	6.61914	6.97298	6.21645	6.43452	5.31055	5.67546	6.44945	7.68218	7.5089	7.07279	7.60262	7.34672	6.64649	7.42595	6.99831	6.81371	7.05266
Gm20721	2	174330319	174346712	-	1.57533e-05	Gm20721	ENSMUSG00000090625	predicted gene, 20721 [Source:MGI Symbol;Acc:MGI:5313030]	gene	overlapping	0	6.22581	6.29798	4.59805	5.6106	5.85046	5.04306	5.77421	6.40918	5.87007	6.69115	7.37962	7.27799	6.9508	6.33776	5.80663	6.85193	7.61761	7.27389	6.85173	7.02166
Ube2f	1	91250311	91288877	+	0.00126123	Ube2f	ENSMUSG00000034343	ubiquitin-conjugating enzyme E2F (putative) [Source:MGI Symbol;Acc:MGI:1915171]	gene	overlapping	0	4.47325	5.32307	5.55905	6.28688	5.49117	4.60494	5.47232	6.11011	4.76422	6.19996	6.90415	6.78619	6.71467	5.32858	5.99426	6.84535	7.41151	6.66249	4.56867	7.07572
Utrn	10	12382188	12861735	-	0.0122833	Utrn	ENSMUSG00000019820	utrophin [Source:MGI Symbol;Acc:MGI:104631]	gene	overlapping	0	4.42542	3.94313	3.79549	4.92508	3.15657	3.35118	2.97189	4.31055	4.56733	3.04346	5.64881	2.93346	4.718	5.58424	5.3957	5.87276	5.11702	3.31131	4.98257	4.55078
Usp47	7	112023506	112111386	+	0.0203981	Usp47	ENSMUSG00000059263	ubiquitin specific peptidase 47 [Source:MGI Symbol;Acc:MGI:1922246]	gene	overlapping	0	5.30724	4.8769	4.17658	3.53735	5.78335	3.54004	4.22905	5.26913	5.3863	2.94392	6.35725	6.31124	4.55636	6.73346	5.86404	3.97746	5.34402	4.32858	5.66577	6.47927
Gnas	2	174284320	174346744	+	1.36905e-05	Gnas	ENSMUSG00000027523	GNAS (guanine nucleotide binding protein, alpha stimulating) complex locus [Source:MGI Symbol;Acc:MGI:95777]	gene	overlapping	0	6.23971	6.37883	4.70014	5.62764	5.86676	5.0982	5.79425	6.42183	5.89197	6.69881	7.38516	7.31943	6.96347	6.3505	5.82501	6.87276	7.629	7.285	6.86852	7.04053
Sox21	14	118233232	118237030	-	0.0063141	Sox21	ENSMUSG00000061517	SRY-box containing gene 21 [Source:MGI Symbol;Acc:MGI:2654070]	gene	overlapping	0	3.65013	6.82264	7.42992	5.96138	5.979	6.43448	4.64776	6.49252	5.65639	4.13657	6.79188	7.64626	7.38481	7.75211	6.87585	6.95809	5.92345	7.44208	7.24646	6.81798
Mrs2	13	24992483	25020379	-	0.022346	Mrs2	ENSMUSG00000021339	MRS2 magnesium homeostasis factor homolog (S. cerevisiae) [Source:MGI Symbol;Acc:MGI:2685748]	gene	overlapping	0	3.53465	3.41262	4.85304	2.67485	2.95175	4.13968	2.52123	4.41552	4.40165	5.43577	5.28009	5.23628	4.38271	5.82501	3.34566	5.04326	6.10402	5.67098	4.34171	4.49714
Tmem57	4	134802759	134853345	-	0.00907887	Tmem57	ENSMUSG00000028826	transmembrane protein 57 [Source:MGI Symbol;Acc:MGI:1913396]	gene	overlapping	0	4.91547	5.53425	3.01308	5.92737	6.44414	5.19412	4.99804	5.18254	5.11087	5.55019	5.98661	4.20123	6.6039	7.37654	5.93627	6.71587	6.53528	5.98066	6.5445	6.69115
Gm14698	X	68821093	68825318	+	0.047653	Gm14698	ENSMUSG00000071748	predicted gene 14698 [Source:MGI Symbol;Acc:MGI:3709613]	gene	overlapping	0	2.53465	5.06712	3.17658	4.75458	4.80381	4.7459	5.29382	5.22649	3.31514	5.03743	5.68518	4.06923	5.68096	3.29884	4.06555	5.24449	4.8475	6.97929	5.93908	6.83969
Tcf19	17	35512734	35516824	-	0.0338475	Tcf19	ENSMUSG00000050410	transcription factor 19 [Source:MGI Symbol;Acc:MGI:103180]	gene	overlapping	0	1.94969	4.88655	4.60763	3.0055	4.12439	4.35622	4.97189	3.69115	3.97896	2.596	4.32688	4.13674	6.1438	5.37209	6.50802	4.46974	2.95997	4.44406	4.84232	4.81469
Ofd1	X	166390033	166440704	-	0.00726107	Ofd1	ENSMUSG00000040586	oral-facial-digital syndrome 1 gene homolog (human) [Source:MGI Symbol;Acc:MGI:1350328]	gene	overlapping	0	3.11961	5.79728	5.76583	5.17735	3.97599	4.41048	4.98938	3.95767	4.06822	5.10235	6.54048	6.01869	6.54703	3.67966	6.04218	4.44213	5.74238	6.27389	5.52698	6.05638
Hcrt	11	100761069	100762931	-	0.0341909	Hcrt	ENSMUSG00000045471	hypocretin [Source:MGI Symbol;Acc:MGI:1202306]	gene	overlapping	0	3.37595	2.11716	4.91612	4.23779	2.99984	5.07395	3.91812	3.04206	6.05129	5.28631	5.51376	5.56817	5.77662	5.61474	5.55832	5.76545	5.81994	5.61222	5.47678	4.98023
Casc5	2	119047119	119105501	+	0.0178605	Casc5	ENSMUSG00000027326	cancer susceptibility candidate 5 [Source:MGI Symbol;Acc:MGI:1923714]	gene	overlapping	0	2.59354	3.54037	3.41362	4.79033	4.87	4.74973	4.86227	4.29688	4.29884	4.67572	6.21108	4.19332	4.46424	4.66224	3.58012	5.62822	5.21093	6.31131	5.14447	6.11453
Arhgap42	9	8994953	9239013	-	0.0025315	Arhgap42	ENSMUSG00000050730	Rho GTPase activating protein 42 [Source:MGI Symbol;Acc:MGI:1918794]	gene	overlapping	0	5.42542	5.07558	5.17013	3.47595	5.20865	5.19131	4.09007	5.29688	3.73422	4.91135	5.56019	5.37553	5.06497	5.62377	5.15059	6.65853	6.0096	4.69115	6.2663	7.05915
Reep1	6	71707561	71810710	+	0.00495915	Reep1	ENSMUSG00000052852	receptor accessory protein 1 [Source:MGI Symbol;Acc:MGI:1098827]	gene	overlapping	0	7.20943	6.59437	5.73117	7.79474	4.71296	7.28802	6.86227	5.8634	7.82382	7.45172	8.02968	7.61996	7.99742	7.46374	7.62888	8.33219	8.82143	7.74844	7.87176	8.2496
Ebpl	14	61339763	61360445	-	0.0180635	Ebpl	ENSMUSG00000021928	emopamil binding protein-like [Source:MGI Symbol;Acc:MGI:1915427]	gene	overlapping	0	3.37595	3.70213	2.12411	3.27431	3.62369	2.7459	3.2582	1.67009	3.06822	3.83701	5.16461	4.65131	5.02253	3.89378	4.13594	3.30323	2.12347	4.5436	2.8648	4.08937
Npdc1	2	25399351	25409494	+	0.00245218	Npdc1	ENSMUSG00000015094	neural proliferation, differentiation and control gene 1 [Source:MGI Symbol;Acc:MGI:1099802]	gene	overlapping	0	6.70123	5.50948	4.85304	5.07754	4.8173	5.47671	4.73328	4.58263	6.15002	4.77319	6.22762	6.42362	6.46424	6.93788	7.29272	5.93599	6.97075	5.76916	6.27751	5.29195
Pml	9	58218076	58249786	-	0.0199209	Pml	ENSMUSG00000036986	promyelocytic leukemia [Source:MGI Symbol;Acc:MGI:104662]	gene	overlapping	0	3.23509	5.24269	4.69115	4.9836	4.96392	5.15421	5.27255	4.61605	5.13861	5.82307	6.16461	3.09492	6.48001	5.16096	6.59983	6.56082	7.18185	4.75005	5.1897	5.9019
Igf2bp3	6	49085221	49214954	-	0.0439432	Igf2bp3	ENSMUSG00000029814	insulin-like growth factor 2 mRNA binding protein 3 [Source:MGI Symbol;Acc:MGI:1890359]	gene	overlapping	0	-1.05031	6.73187	4.41362	5.96808	5.92085	5.46976	5.5332	4.75256	5.3863	5.78042	6.19856	7.22566	6.67583	7.1222	6.7127	6.10839	5.77964	6.42411	6.38642	6.34149
Trnau1ap	4	132311763	132329538	-	0.000133555	Trnau1ap	ENSMUSG00000028898	tRNA selenocysteine 1 associated protein 1 [Source:MGI Symbol;Acc:MGI:1919037]	gene	overlapping	0	3.40912	5.27244	4.86907	4.91123	3.63896	4.19131	4.86227	5.15249	4.77604	5.57119	6.47965	5.46032	6.01173	5.91109	6.35412	5.5398	4.98145	5.93062	4.78059	5.86426
Eif4ebp2	10	61432497	61452669	-	0.0352977	Eif4ebp2	ENSMUSG00000020091	eukaryotic translation initiation factor 4E binding protein 2 [Source:MGI Symbol;Acc:MGI:109198]	gene	overlapping	0	5.78889	5.35817	3.96914	2.83991	4.39103	5.15421	5.22167	4.42812	5.65639	5.01308	6.02496	6.3825	6.40559	6.00849	7.10994	3.3925	4.0843	6.06297	6.38772	4.82344
Fscn1	5	142960343	142973185	+	3.27034e-06	Fscn1	ENSMUSG00000029581	fascin homolog 1, actin bundling protein (Strongylocentrotus purpuratus) [Source:MGI Symbol;Acc:MGI:1352745]	gene	overlapping	0	5.09943	5.73455	5.13741	5.08989	5.79362	5.08915	4.28676	5.00889	4.75827	5.29644	6.12984	6.06491	6.75573	6.59039	6.84766	5.44561	5.8475	6.17467	5.80405	5.62768
Tex264	9	106658747	106685948	-	0.000390261	Tex264	ENSMUSG00000040813	testis expressed gene 264 [Source:MGI Symbol;Acc:MGI:1096570]	gene	overlapping	0	6.71787	5.67454	6.53162	6.20031	5.3545	5.11909	5.71237	5.33752	4.46146	6.46748	7.07835	6.78619	7.14256	6.09974	7.18419	7.11824	7.81297	5.80971	6.27612	6.81798
Spg20	3	55112108	55137322	+	0.00440555	Spg20	ENSMUSG00000036580	spastic paraplegia 20, spartin (Troyer syndrome) homolog (human) [Source:MGI Symbol;Acc:MGI:2139806]	gene	overlapping	0	1.27162	4.084	3.84496	3.61914	3.29792	3.99866	4.49698	3.48952	2.36297	4.0673	4.24802	4.07785	4.00084	4.01766	5.20305	4.26434	5.12347	5.49851	4.48889	4.90396
Myef2	2	125084628	125123661	-	0.000218633	Myef2	ENSMUSG00000027201	myelin basic protein expression factor 2, repressor [Source:MGI Symbol;Acc:MGI:104592]	gene	overlapping	0	4.39263	5.83764	5.93908	6.063	4.93947	5.20254	5.99804	5.81625	5.82525	6.05841	6.78072	6.28916	6.21147	6.26462	5.44406	6.32229	7.21547	7.31781	6.2118	7.6063
Lasp1	11	97799000	97838764	+	0.0246385	Lasp1	ENSMUSG00000038366	LIM and SH3 protein 1 [Source:MGI Symbol;Acc:MGI:109656]	gene	overlapping	0	6.39677	4.77667	3.70908	5.20789	6.38425	6.14405	6.30434	5.17509	6.33925	5.48529	6.32688	4.8704	6.40353	7.11369	6.12362	7.55277	8.12909	6.38748	6.22779	6.44001
Cd2ap	17	42792951	42876424	-	2.74173e-05	Cd2ap	ENSMUSG00000061665	CD2-associated protein [Source:MGI Symbol;Acc:MGI:1330281]	gene	overlapping	0	6.67079	7.34073	5.97285	6.84599	6.65782	7.23091	7.58588	6.25859	7.33426	7.16032	7.59087	7.54506	7.53387	8.04199	7.37298	7.94463	7.91044	8.71967	7.94876	8.58557
Dgkz	2	91932824	91975864	-	0.001348	Dgkz	ENSMUSG00000040479	diacylglycerol kinase zeta [Source:MGI Symbol;Acc:MGI:1278339]	gene	overlapping	0	4.91547	3.94313	4.53915	5.42487	4.26877	5.54225	4.89974	4.47745	5.29062	5.75127	5.54048	6.32939	5.91645	5.7279	5.65737	5.619	7.17565	5.86404	5.73453	5.60757
Rfc5	5	117378103	117389047	-	2.1835e-07	Rfc5	ENSMUSG00000029363	replication factor C (activator 1) 5 [Source:MGI Symbol;Acc:MGI:1919401]	gene	overlapping	0	5.67079	6.07136	5.96542	5.45064	6.15656	5.76874	5.79425	6.26913	6.79941	6.56493	7.27612	6.81996	7.01714	7.34778	7.45394	7.11715	6.67586	7.28721	6.11195	7.44285
Xrcc6bp1	10	126868430	126901371	-	0.0237734	Xrcc6bp1	ENSMUSG00000025436	XRCC6 binding protein 1 [Source:MGI Symbol;Acc:MGI:1916984]	gene	overlapping	0	3.19761	6.10067	4.38045	3.92508	3.51205	3.72269	3.44723	4.21199	3.77014	4.14779	5.14733	6.31306	5.66035	6.10404	5.72743	4.31088	4.48604	5.27166	3.14753	4.38349
Rnf149	1	39551296	39577405	-	2.72101e-08	Rnf149	ENSMUSG00000048234	ring finger protein 149 [Source:MGI Symbol;Acc:MGI:2677438]	gene	overlapping	0	5.80144	7.59142	6.62189	6.60774	6.6503	5.54446	6.49392	6.38999	6.31311	6.93908	7.40529	7.64118	7.65602	7.47376	7.58911	7.64042	7.98677	7.72906	7.00045	7.6082
Slc12a7	13	73763697	73816743	+	0.00217045	Slc12a7	ENSMUSG00000017756	solute carrier family 12, member 7 [Source:MGI Symbol;Acc:MGI:1342283]	gene	overlapping	0	4.50428	5.98865	6.30292	5.69924	5.53671	5.68516	5.2437	5.73745	5.5876	5.64039	4.70303	6.86046	5.84823	6.43497	6.25142	7.89839	6.81197	5.62975	6.51519	7.21845
Dhcr7	7	143823145	143848410	+	0.00169381	Dhcr7	ENSMUSG00000058454	7-dehydrocholesterol reductase [Source:MGI Symbol;Acc:MGI:1298378]	gene	overlapping	0	3.342	4.66896	3.92382	4.89724	3.62369	4.2946	4.50916	4.57131	5.21444	4.58778	4.84911	5.89985	5.94513	4.9618	5.84015	6.10619	5.75074	4.0343	4.78059	5.01117
Spg21	9	65460937	65488470	+	3.41452e-05	Spg21	ENSMUSG00000032388	spastic paraplegia 21 homolog (human) [Source:MGI Symbol;Acc:MGI:106403]	gene	overlapping	0	4.8922	5.54648	5.25797	6.15598	5.25398	4.60916	5.06555	5.98351	5.99169	6.48529	7.22556	6.69115	6.66897	6.33593	6.61399	6.72735	6.79185	6.67098	5.52698	6.44852
Gm4204	1	135232045	135233404	+	0.000250455	Gm4204	ENSMUSG00000079139	predicted gene 4204 [Source:MGI Symbol;Acc:MGI:3782381]	gene	overlapping	0	2.19761	4.33016	2.12411	3.70727	3.66902	3.0368	3.56854	4.21199	3.69739	3.98206	5.3722	4.38597	4.89308	4.54042	4.66419	4.41398	4.45567	4.52872	3.90875	4.27293
Msl1	11	98795516	98807859	+	4.71706e-05	Msl1	ENSMUSG00000052915	male-specific lethal 1 homolog (Drosophila) [Source:MGI Symbol;Acc:MGI:1921276]	gene	overlapping	0	5.70458	6.15359	5.82455	6.65836	6.00868	6.25874	5.98503	5.99202	6.63869	7.02531	6.2235	7.41939	7.75086	7.69258	7.3709	7.06266	7.66041	7.36148	6.5445	6.75539
Dcbld1	10	52233619	52321378	+	3.95253e-05	Dcbld1	ENSMUSG00000019891	discoidin, CUB and LCCL domain containing 1 [Source:MGI Symbol;Acc:MGI:1913936]	gene	overlapping	0	5.24431	6.15359	6.78497	7.16379	5.66529	5.86726	6.56271	5.96201	6.30701	5.98206	7.16246	6.80577	7.4513	7.63943	6.38954	7.38436	7.74657	7.6341	6.59693	6.9645
Slc7a2	8	40862396	40922308	+	0.0214305	Slc7a2	ENSMUSG00000031596	solute carrier family 7 (cationic amino acid transporter, y+ system), member 2 [Source:MGI Symbol;Acc:MGI:99828]	gene	overlapping	0	3.37595	4.73455	3.72678	3.46335	4.60826	3.55763	3.82379	1.97495	4.05857	4.03138	3.29585	4.45371	5.48001	4.98066	5.67436	5.30323	3.82391	2.95863	5.06902	5.24065
Tmem9b	7	109735834	109752875	-	4.63492e-06	Tmem9b	ENSMUSG00000031021	TMEM9 domain family, member B [Source:MGI Symbol;Acc:MGI:1915254]	gene	overlapping	0	5.44154	6.15359	4.70014	5.77512	5.20865	5.21368	5.49086	5.42183	5.85343	5.89145	6.85444	6.87659	6.60929	6.46876	6.59269	6.58784	6.62673	6.74684	4.90875	6.38496
G6pdx	X	74409483	74429194	-	0.0055712	G6pdx	ENSMUSG00000031400	glucose-6-phosphate dehydrogenase X-linked [Source:MGI Symbol;Acc:MGI:105979]	gene	overlapping	0	4.42542	5.67454	4.54913	6.05252	4.41783	5.91582	5.09816	4.19734	5.28235	4.81605	6.98418	6.30391	5.65341	6.39335	6.48701	4.75987	6.71913	5.79425	5.79237	5.35964
Lrp11	10	7589800	7625483	+	0.00533676	Lrp11	ENSMUSG00000019796	low density lipoprotein receptor-related protein 11 [Source:MGI Symbol;Acc:MGI:2442989]	gene	overlapping	0	4.82005	3.80748	4.20212	5.34126	3.65407	4.71879	2.52123	4.83056	4.70359	4.44035	5.81668	4.9047	4.86334	5.13594	4.43611	5.85193	5.6199	5.50232	6.20153	5.23083
Actn2	13	12269426	12340760	-	0.00036744	Actn2	ENSMUSG00000052374	actinin alpha 2 [Source:MGI Symbol;Acc:MGI:109192]	gene	overlapping	0	4.13951	4.8769	5.87702	5.87125	4.25893	5.4928	4.2582	5.3241	4.92155	5.45398	6.40892	6.7381	5.95926	6.15059	6.03693	6.21012	6.70628	5.20305	5.77466	5.6025
Mllt4	17	13760539	13906150	+	2.50868e-06	Mllt4	ENSMUSG00000068036	myeloid/lymphoid or mixed-lineage leukemia (trithorax homolog, Drosophila); translocated to, 4 [Source:MGI Symbol;Acc:MGI:1314653]	gene	overlapping	0	5.4009	5.89614	5.55905	5.66388	5.01747	5.51998	6.04479	5.23368	6.24242	5.76227	5.80571	6.62217	6.47608	6.20973	6.47543	7.15484	7.3956	6.53804	6.51992	6.60757
Rtcd1	3	116488963	116508208	-	0.000196201	Rtcd1	ENSMUSG00000000339	RNA terminal phosphate cyclase domain 1 [Source:MGI Symbol;Acc:MGI:1913618]	gene	overlapping	0	4.44154	4.74519	5.27009	5.5039	5.52031	5.69712	5.11419	5.03384	4.92687	6.13657	6.47273	5.93108	6.83909	5.9451	5.31997	5.94093	7.06933	6.07582	5.89425	6.45275
Mllt1	17	56892612	56935388	-	0.0316737	Mllt1	ENSMUSG00000024212	myeloid/lymphoid or mixed-lineage leukemia (trithorax homolog, Drosophila); translocated to, 1 [Source:MGI Symbol;Acc:MGI:1927238]	gene	overlapping	0	3.5644	3.6801	2.82866	3.0055	4.38199	3.93278	3.3957	4.47745	2.98915	4.22403	3.35725	5.23242	2.95644	3.26846	5.63323	4.71442	4.69982	5.46765	3.23067	5.41853
Yeats4	10	117215142	117224507	-	1.39516e-06	Yeats4	ENSMUSG00000020171	YEATS domain containing 4 [Source:MGI Symbol;Acc:MGI:1927224]	gene	overlapping	0	6.31601	6.68287	6.47251	5.61914	5.10253	5.79122	5.88113	6.07448	6.20791	6.04045	7.68368	6.84666	6.51295	7.2913	7.43012	7.03635	7.35914	6.83562	5.6421	6.70305
Vps54	11	21239281	21321136	+	0.0239722	Vps54	ENSMUSG00000020128	vacuolar protein sorting 54 (yeast) [Source:MGI Symbol;Acc:MGI:2178798]	gene	overlapping	0	4.09943	4.86718	5.95794	5.92967	5.16186	5.62594	5.09816	4.97495	6.10619	6.63242	6.72358	6.39806	3.69791	6.39159	5.88171	7.26631	7.21849	6.01308	6.44231	7.08575
Rbbp4	4	129307100	129335370	-	0.0102824	Rbbp4	ENSMUSG00000057236	retinoblastoma binding protein 4 [Source:MGI Symbol;Acc:MGI:1194912]	gene	overlapping	0	5.69115	4.06712	3.90839	5.81533	5.59266	5.4581	6.42169	5.40281	5.57411	4.8019	6.28009	4.61627	6.47804	5.7473	5.96693	6.35597	7.21698	7.02373	5.88694	6.74277
Arhgef26	3	62338344	62462221	+	0.0471272	Arhgef26	ENSMUSG00000036885	Rho guanine nucleotide exchange factor (GEF) 26 [Source:MGI Symbol;Acc:MGI:1918053]	gene	overlapping	0	4.99408	4.64642	3.84496	5.05672	5.52443	3.1455	5.09816	4.72218	3.96869	4.01921	4.83838	2.14496	4.46424	6.00159	5.13102	6.3979	5.9345	6.65907	4.96533	5.66464
2700094K13Rik	2	84669218	84670770	-	0.000981625	2700094K13Rik	ENSMUSG00000076437	RIKEN cDNA 2700094K13 gene [Source:MGI Symbol;Acc:MGI:1919907]	gene	overlapping	0	4.99408	5.63501	4.49851	3.78021	4.03489	4.42493	4.05728	4.86803	5.46146	5.66795	6.26414	5.53415	5.54516	5.50829	6.5436	5.60973	6.36051	5.03955	5.91594	5.12517
Baiap2	11	119942763	120006782	+	0.00652708	Baiap2	ENSMUSG00000025372	brain-specific angiogenesis inhibitor 1-associated protein 2 [Source:MGI Symbol;Acc:MGI:2137336]	gene	overlapping	0	4.47325	4.62352	5.17013	3.3447	5.06346	5.08915	5.89511	5.12179	5.46146	4.77319	4.18168	6.17136	5.05448	6.15474	6.12114	6.07282	7.16942	5.55832	5.92845	5.31384
Peli1	11	21091291	21150323	+	0.0300953	Peli1	ENSMUSG00000020134	pellino 1 [Source:MGI Symbol;Acc:MGI:1914495]	gene	overlapping	0	1.65013	5.02405	6.37765	4.73375	6.43543	5.18849	6.2437	6.09042	5.60096	5.82656	7.36848	5.42024	5.93372	6.06481	5.79114	7.07619	7.07267	7.275	5.77664	6.86638
Rnf138	18	21001341	21028223	+	0.0305043	Rnf138	ENSMUSG00000024317	ring finger protein 138 [Source:MGI Symbol;Acc:MGI:1929211]	gene	overlapping	0	5.13951	4.55255	4.26404	5.38535	4.51205	5.1455	3.89974	4.28307	5.31919	3.76592	5.80571	4.42024	3.36584	5.87878	4.60869	6.1749	5.89732	6.76599	5.84797	5.24065
Rab3ip	10	116905784	116950380	-	3.3153e-07	Rab3ip	ENSMUSG00000064181	RAB3A interacting protein [Source:MGI Symbol;Acc:MGI:105933]	gene	overlapping	0	4.8922	5.97514	5.97285	5.33436	5.45281	5.24659	5.54508	5.18996	5.43186	5.69115	6.68218	7.08748	5.6039	6.50829	6.24005	6.46974	7.04913	6.01041	5.97914	6.01308
Fxc1	7	105640056	105655748	+	0.000418686	Fxc1	ENSMUSG00000089847	fractured callus expressed transcript 1 [Source:MGI Symbol;Acc:MGI:1315196]	gene	overlapping	0	3.67761	5.29436	3.69115	4.41182	2.65407	3.81336	3.56854	4.51337	4.52591	4.07908	5.28799	4.82508	5.48001	5.29884	5.50612	5.15803	5.06431	5.01842	4.70783	4.34149
C80913	7	37960002	38019542	-	0.00771293	C80913	ENSMUSG00000030421	expressed sequence C80913 [Source:MGI Symbol;Acc:MGI:1342294]	gene	overlapping	0	3.75704	6.084	4.29996	6.22292	4.77646	5.37618	5.62557	3.88641	5.56733	5.44491	6.28404	6.0757	6.6021	5.85598	5.53246	6.20191	6.04404	7.11369	5.87222	6.26332
Hadh	3	131233419	131272101	-	0.000124483	Hadh	ENSMUSG00000027984	hydroxyacyl-Coenzyme A dehydrogenase [Source:MGI Symbol;Acc:MGI:96009]	gene	overlapping	0	6.40912	5.43909	5.83275	6.40525	5.0691	6.21506	6.36923	5.70675	6.94531	6.38449	7.25005	7.20024	6.5282	6.45534	7.27723	7.59491	7.52557	7.06426	6.49371	7.03207
Cdk2ap2	19	4097182	4099019	+	3.55631e-06	Cdk2ap2	ENSMUSG00000024856	CDK2-associated protein 2 [Source:MGI Symbol;Acc:MGI:1098779]	gene	overlapping	0	4.63619	6.16553	5.09715	5.75458	5.60048	5.36374	5.45354	6.09042	4.48326	5.16447	5.88082	6.55435	6.15857	6.44179	6.92211	6.22842	6.70628	6.56198	6.15059	6.05266
2810021B07Rik	13	17695413	17699105	+	0.00528045	2810021B07Rik	ENSMUSG00000012429	RIKEN cDNA 2810021B07 gene [Source:MGI Symbol;Acc:MGI:1913558]	gene	overlapping	0	4.05821	6.12126	5.36358	3.91586	3.99984	4.23023	3.59162	4.82103	4.47603	5.28631	6.25611	5.64263	6.04656	5.96417	6.4559	4.11496	5.20486	5.88463	5.13525	5.24065
Mrps35	6	147042764	147070903	+	0.02499	Mrps35	ENSMUSG00000040112	mitochondrial ribosomal protein S35 [Source:MGI Symbol;Acc:MGI:2385255]	gene	overlapping	0	5.73105	5.50322	4.47775	2.53735	4.15656	4.1455	4.27255	3.81145	5.28235	3.98206	5.39434	5.79405	4.55636	5.79336	6.33715	5.93103	5.90483	4.44406	4.02644	5.81688
Dnajc25	4	58995062	59025573	+	0.0129336	Dnajc25	ENSMUSG00000070972	DnaJ (Hsp40) homolog, subfamily C, member 25 [Source:MGI Symbol;Acc:MGI:1919679]	gene	overlapping	0	4.19761	5.10067	3.15059	3.39864	4.15656	3.07395	3.10619	3.53683	3.63382	4.07908	3.63027	4.46689	4.07539	5.48536	5.59805	4.74299	4.64703	4.44406	3.4448	5.64751
Tmem184c	8	77595982	77610698	-	0.00453599	Tmem184c	ENSMUSG00000031617	transmembrane protein 184C [Source:MGI Symbol;Acc:MGI:2384562]	gene	overlapping	0	5.27162	5.09236	6.60285	6.42325	6.74506	5.83155	5.95864	5.40918	5.40926	5.21871	6.84375	4.89985	5.9981	6.73624	6.59448	7.42107	6.57114	7.03693	7.11664	7.57428
Lars2	9	123366940	123462664	+	0.0318768	Lars2	ENSMUSG00000035202	leucyl-tRNA synthetase, mitochondrial [Source:MGI Symbol;Acc:MGI:2142973]	gene	overlapping	0	2.80767	3.76626	3.45669	3.21542	2.42665	3.79122	3.3957	3.75256	4.71592	2.34602	4.52718	3.89498	4.3743	5.58732	4.61575	4.3925	5.06431	3.70445	2.70783	3.6025
Slc39a2	14	51892889	51896745	+	0.0127841	Slc39a2	ENSMUSG00000072572	solute carrier family 39 (zinc transporter), member 2 [Source:MGI Symbol;Acc:MGI:2684326]	gene	overlapping	0	3.80767	2.86718	4.77862	4.54335	4.24901	3.41048	3.78426	5.45299	3.85063	5.55442	5.72066	4.44042	5.14627	5.79602	5.19365	6.11715	5.77964	4.16509	5.51044	4.67192
Gstp2	19	4040351	4042165	-	0.0451215	Gstp2	ENSMUSG00000038155	glutathione S-transferase, pi 2 [Source:MGI Symbol;Acc:MGI:95864]	gene	overlapping	0	4.92697	3.96151	2.53915	4.01416	3.87646	4.83877	3.56854	3.44061	4.15229	5.46748	4.91184	4.79927	5.13137	5.45871	3.867	5.51351	6.25863	3.79425	5.61804	4.99964
Zfp60	7	27731389	27753702	+	0.022006	Zfp60	ENSMUSG00000037640	zinc finger protein 60 [Source:MGI Symbol;Acc:MGI:99207]	gene	overlapping	0	4.15914	4.41262	2.79549	3.83013	3.60826	3.51324	3.88113	4.57131	4.50474	3.09076	5.37962	5.8852	4.95645	5.49523	3.59448	4.62516	2.56404	4.53618	4.81178	4.09661
Crebbp	16	4084048	4213404	-	0.045268	Crebbp	ENSMUSG00000022521	CREB binding protein [Source:MGI Symbol;Acc:MGI:1098280]	gene	overlapping	0	5.33339	4.25764	2.27612	5.34813	5.98199	6.08613	5.98503	5.21925	5.50118	4.70642	6.52384	5.93583	6.6075	6.79336	5.12114	5.11933	7.05758	5.79425	5.80405	6.38939
Tacc2	7	130577484	130764784	+	0.00465787	Tacc2	ENSMUSG00000030852	transforming, acidic coiled-coil containing protein 2 [Source:MGI Symbol;Acc:MGI:1928899]	gene	overlapping	0	2.99408	5.35817	5.48297	4.65283	4.05779	3.8848	3.59162	4.33752	5.17926	4.86449	6.02022	5.39289	5.69791	5.44179	4.24005	5.95076	6.0876	5.02902	5.55721	4.89154
Gde1	7	118688545	118705778	-	0.000564762	Gde1	ENSMUSG00000033917	glycerophosphodiester phosphodiesterase 1 [Source:MGI Symbol;Acc:MGI:1891827]	gene	overlapping	0	4.82005	7.9104	7.31905	5.52224	7.00427	6.4141	6.72548	6.48651	7.06702	7.07614	8.04609	7.6339	7.92942	7.81782	7.95377	7.86108	7.98056	7.69782	6.92042	7.17385
Brpf3	17	28801090	28838546	+	0.00495915	Brpf3	ENSMUSG00000063952	bromodomain and PHD finger containing, 3 [Source:MGI Symbol;Acc:MGI:2146836]	gene	overlapping	0	4.07897	5.21232	3.01308	3.88785	3.92708	3.84952	4.68043	5.31734	4.66595	4.96311	5.05769	5.427	6.02791	5.68542	4.06555	5.00603	6.12347	5.69782	4.45471	5.24391
Zbtb7b	3	89377644	89394776	-	0.0109326	Zbtb7b	ENSMUSG00000028042	zinc finger and BTB domain containing 7B [Source:MGI Symbol;Acc:MGI:102755]	gene	overlapping	0	5.15914	3.21232	5.97656	5.46018	5.18285	5.19131	4.63671	6.13338	6.39015	5.72153	6.19436	5.46689	6.78775	6.42812	6.7958	6.36335	6.93817	4.93627	6.75774	6.24228
Enah	1	181904445	182019980	-	0.000116477	Enah	ENSMUSG00000022995	enabled homolog (Drosophila) [Source:MGI Symbol;Acc:MGI:108360]	gene	overlapping	0	5.0265	7.10688	5.34077	6.72849	6.33823	6.27479	6.87643	6.70675	6.49762	6.54383	7.27413	7.37553	7.40559	7.09758	6.88901	7.36794	8.0295	7.00236	6.7707	7.76507
Epc1	18	6435951	6516108	-	0.0395294	Epc1	ENSMUSG00000024240	enhancer of polycomb homolog 1 (Drosophila) [Source:MGI Symbol;Acc:MGI:1278322]	gene	overlapping	0	2.40912	4.93386	4.62661	3.99678	4.60826	4.2357	3.10619	4.28307	3.94793	5.03743	6.13424	4.91915	6.02522	4.89875	5.60515	4.87792	4.99559	2.3957	4.41971	4.89983
1810043H04Rik	11	120098928	120100704	+	0.0259415	1810043H04Rik	ENSMUSG00000078572	RIKEN cDNA 1810043H04 gene [Source:MGI Symbol;Acc:MGI:1913676]	gene	overlapping	0	0.757042	4.30159	3.20212	3.90658	2.95175	3.15709	3.42169	3.77245	3.08733	3.86449	3.72649	5.12016	4.47214	4.91355	4.55098	2.79303	4.76733	4.24915	3.28726	3.92035
Xiap	X	42059679	42109656	+	0.00846042	Xiap	ENSMUSG00000025860	X-linked inhibitor of apoptosis [Source:MGI Symbol;Acc:MGI:107572]	gene	overlapping	0	5.18809	6.80748	7.00585	6.7046	5.46998	6.68015	5.61434	5.95767	6.71285	5.89812	8.12213	6.51684	7.44328	6.28373	5.14084	7.1749	7.07933	7.64103	7.35235	7.44001
Dnhd1	7	105640562	105721799	+	0.00164258	Dnhd1	ENSMUSG00000030882	dynein heavy chain domain 1 [Source:MGI Symbol;Acc:MGI:1924755]	gene	overlapping	0	3.23509	3.90566	3.41362	3.90658	1.82399	3.73047	3.07377	3.75256	4.20573	3.76592	4.3722	4.27799	5.02253	4.37209	4.94189	4.63128	4.47599	4.43611	4.04625	3.61262
Higd1a	9	121848560	121858000	-	0.010356	Higd1a	ENSMUSG00000038412	HIG1 domain family, member 1A [Source:MGI Symbol;Acc:MGI:1930666]	gene	overlapping	0	2.40912	5.67454	4.20212	4.46966	4.15656	3.43924	3.72286	4.07448	3.85063	5.0732	5.34215	5.70234	5.5785	5.1774	5.69782	4.29553	4.88597	5.36672	4.23643	5.13574
Ube2q1	3	89773609	89783997	+	0.0217998	Ube2q1	ENSMUSG00000042572	ubiquitin-conjugating enzyme E2Q (putative) 1 [Source:MGI Symbol;Acc:MGI:1917343]	gene	overlapping	0	4.6079	5.45215	2.17658	4.7494	4.5769	5.4581	4.58012	4.90456	5.54331	5.31647	5.82214	4.94762	6.46424	5.31379	5.01308	6.1686	6.40623	5.96969	5.9877	5.01499
Snw1	12	87449936	87472299	-	0.0016024	Snw1	ENSMUSG00000021039	SNW domain containing 1 [Source:MGI Symbol;Acc:MGI:1913604]	gene	overlapping	0	4.80767	5.76102	4.95419	5.46018	6.06628	5.02103	5.99804	6.24797	5.35511	5.79478	7.05769	6.28172	6.64119	5.91109	7.08855	5.95076	7.33571	5.48701	4.87222	6.60503
Gm15832	1	39547570	39552002	-	0.000990772	Gm15832	ENSMUSG00000085894	predicted gene 15832 [Source:MGI Symbol;Acc:MGI:3834078]	gene	overlapping	0	4.13951	6.89375	4.79549	5.5523	5.18804	4.16859	5.33544	5.34418	4.88925	5.48086	6.17743	6.41345	6.33148	6.23154	5.96969	6.33548	6.52557	6.27166	5.68063	6.52153
Naa30	14	49172226	49191031	+	0.0217998	Naa30	ENSMUSG00000036282	N(alpha)-acetyltransferase 30, NatC catalytic subunit [Source:MGI Symbol;Acc:MGI:1922259]	gene	overlapping	0	3.40912	5.73455	5.39159	5.19651	5.65407	4.53116	4.83351	5.63248	4.69739	4.78762	5.00111	5.7217	4.82681	5.67388	4.58732	5.26828	5.74238	6.90349	6.27192	7.29981
Arid2	15	96287518	96404992	+	2.38628e-10	Arid2	ENSMUSG00000033237	AT rich interactive domain 2 (ARID, RFX-like) [Source:MGI Symbol;Acc:MGI:1924294]	gene	overlapping	0	6.28508	6.83266	6.97841	6.82028	6.82399	6.16716	6.40224	6.92248	7.21336	6.88643	8.11659	7.63754	7.5985	8.04927	7.06555	7.70574	7.61303	7.24688	7.4298	7.56714
Dhx32	7	133720942	133782726	-	0.00171367	Dhx32	ENSMUSG00000030986	DEAH (Asp-Glu-Ala-His) box polypeptide 32 [Source:MGI Symbol;Acc:MGI:2141813]	gene	overlapping	0	4.5496	6.37541	6.93528	5.42162	6.70573	7.06552	6.20305	5.88641	5.5224	6.36057	6.87558	6.61183	6.97604	7.35231	6.62101	7.49599	7.70521	7.53711	6.8906	6.76109
Ntan1	16	13819251	13835451	+	0.0271906	Ntan1	ENSMUSG00000022681	N-terminal Asn amidase [Source:MGI Symbol;Acc:MGI:108471]	gene	overlapping	0	5.7441	6.01528	3.17658	3.67485	4.52031	4.50872	4.32858	4.41552	3.78192	4.11385	6.40892	5.87288	4.83909	6.15267	4.42812	4.92357	6.05758	5.07582	5.4298	4.98023
Fxn	19	24261453	24280605	-	0.00222767	Fxn	ENSMUSG00000059363	frataxin [Source:MGI Symbol;Acc:MGI:1096879]	gene	overlapping	0	4.47325	4.3992	3.77862	4.23037	3.65407	3.70701	4.09007	4.41552	3.80519	4.25551	4.71481	5.81739	5.21854	5.50829	5.63323	4.90346	4.149	4.46765	4.2074	3.49714
Rsbn1l	5	20893028	20951822	-	0.0341741	Rsbn1l	ENSMUSG00000039968	round spermatid basic protein 1-like [Source:MGI Symbol;Acc:MGI:3036237]	gene	overlapping	0	1.75704	5.8176	5.06271	4.87839	4.92085	3.68316	4.16893	4.52514	4.8838	5.14779	5.93216	4.39289	6.42609	5.27229	5.56562	4.67345	4.75074	6.16749	5.13833	6.33233
Gatc	5	115333242	115341178	-	0.0355442	Gatc	ENSMUSG00000029536	glutamyl-tRNA(Gln) amidotransferase, subunit C homolog (bacterial) [Source:MGI Symbol;Acc:MGI:1923776]	gene	overlapping	0	3.37595	4.49062	3.01308	4.46966	4.29792	4.04929	4.12213	3.83056	4.18813	3.99455	5.47965	3.87535	5.83296	3.81191	5.44802	4.8933	4.87836	5.50991	3.93023	2.6025
Gata6	18	11052510	11085635	+	0.00371127	Gata6	ENSMUSG00000005836	GATA binding protein 6 [Source:MGI Symbol;Acc:MGI:107516]	gene	overlapping	0	5.75704	7.33016	8.1341	7.62975	7.00427	6.7324	5.72808	7.27263	8.21499	8.04721	9.04434	7.9813	7.92439	8.17484	7.90925	8.39879	8.75595	7.96831	7.96273	8.0245
Tgm4	9	123034739	123067561	+	0.0092156	Tgm4	ENSMUSG00000025787	transglutaminase 4 (prostate) [Source:MGI Symbol;Acc:MGI:3027002]	gene	overlapping	0	3.44154	2.61193	4.40265	3.48844	3.76954	2.66704	3.49698	2.58263	3.7936	3.85081	4.03908	4.55589	4.89308	4.58424	4.76282	3.89839	4.45567	4.99696	3.60474	2.73815
Gm13008	4	136003566	136010937	+	0.00193634	Gm13008	ENSMUSG00000085714	predicted gene 13008 [Source:MGI Symbol;Acc:MGI:3702670]	gene	overlapping	0	3.30724	4.98865	6.05222	4.43136	4.74153	4.82066	4.79425	5.38353	4.42437	5.33624	6.84107	5.13261	6.4523	5.63572	5.65394	5.52013	5.0096	5.95863	5.25357	5.80369
Haus4	14	54541785	54554361	-	0.000924749	Haus4	ENSMUSG00000022177	HAUS augmin-like complex, subunit 4 [Source:MGI Symbol;Acc:MGI:1261794]	gene	overlapping	0	4.79518	6.39582	6.39159	6.16962	6.53263	6.1027	6.08194	6.47137	5.6723	5.03743	7.09647	7.26296	6.37851	7.59039	7.77232	6.09294	6.85527	6.27389	6.31065	6.4113
E2f5	3	14578671	14606308	+	0.00290646	E2f5	ENSMUSG00000027552	E2F transcription factor 5 [Source:MGI Symbol;Acc:MGI:105091]	gene	overlapping	0	4.45748	6.33369	5.50878	4.22292	6.01747	4.65891	5.28676	5.69115	5.19696	5.23985	6.28009	6.71205	6.81598	6.89254	6.4696	5.89075	4.85527	6.33073	5.24217	5.75425
Tbc1d8	1	39371499	39478747	-	0.0457173	Tbc1d8	ENSMUSG00000003134	TBC1 domain family, member 8 [Source:MGI Symbol;Acc:MGI:1927225]	gene	overlapping	0	4.47325	5.00646	4.08347	4.48221	4.42665	3.80602	2.82379	3.28307	4.51183	4.04346	6.55693	3.44042	5.67412	4.7195	5.16989	4.95809	3.77555	4.04479	4.82713	4.74277
Zbtb37	1	161008794	161034849	-	0.0186195	Zbtb37	ENSMUSG00000043467	zinc finger and BTB domain containing 37 [Source:MGI Symbol;Acc:MGI:2444467]	gene	overlapping	0	2.40912	3.99758	5.46726	4.50697	5.26386	5.47671	5.50916	6.03384	5.00431	3.79478	5.64266	6.20123	6.68437	5.76644	5.47154	6.19572	5.05082	5.79425	5.32017	6.04707
Gm12359	11	98797707	98810087	-	0.0268041	Gm12359	ENSMUSG00000075576	predicted gene 12359 [Source:MGI Symbol;Acc:MGI:3702436]	gene	overlapping	0	1.53465	0.465086	2.61715	2.35838	2.1135	2.38113	0.936267	2.94018	2.08733	3.01921	3.16461	2.56817	3.48001	3.42812	3.37921	3.01543	3.75906	2.66419	2.12287	2.43003
Lrrc41	4	116075269	116097043	+	0.00371127	Lrrc41	ENSMUSG00000028703	leucine rich repeat containing 41 [Source:MGI Symbol;Acc:MGI:2441984]	gene	overlapping	0	6.03184	4.8574	5.99858	5.78528	5.52031	5.00509	5.3957	5.12179	5.33526	4.95035	6.72066	5.10338	6.36584	5.59652	5.87878	7.23246	7.11053	5.9447	4.90875	6.39086
Gtpbp6	5	110103975	110108197	-	0.000177305	Gtpbp6	ENSMUSG00000033434	GTP binding protein 6 (putative) [Source:MGI Symbol;Acc:MGI:1306825]	gene	overlapping	0	6.04244	4.34423	6.06271	5.08989	5.46998	5.04929	5.07377	6.50447	5.77604	6.26327	7.27214	6.46196	6.71467	6.36313	6.58012	6.71009	6.70843	5.87291	5.96533	6.38349
Atrx	X	105797615	105929397	-	0.000912782	Atrx	ENSMUSG00000031229	alpha thalassemia/mental retardation syndrome X-linked homolog (human) [Source:MGI Symbol;Acc:MGI:103067]	gene	overlapping	0	6.16401	6.41262	6.6889	6.6625	6.78335	7.02499	6.64225	7.4835	6.28235	6.16171	8.42961	7.05294	7.35091	6.18148	6.21704	7.1291	8.05589	7.64793	7.96359	7.73004
Dnmt3b	2	153649450	153687730	+	0.00155062	Dnmt3b	ENSMUSG00000027478	DNA methyltransferase 3B [Source:MGI Symbol;Acc:MGI:1261819]	gene	overlapping	0	5.51193	6.44563	5.5541	5.59046	5.99094	5.77815	5.54508	5.71706	6.02428	5.64832	6.20274	5.69115	7.10238	6.95347	5.73393	7.19572	7.79387	6.07837	5.77664	6.29195
Cmtm4	8	104348191	104395807	-	0.000251795	Cmtm4	ENSMUSG00000096188	CKLF-like MARVEL transmembrane domain containing 4 [Source:MGI Symbol;Acc:MGI:2142888]	gene	overlapping	0	6.35483	7.57062	6.34937	6.47595	5.44848	5.75736	5.81891	6.31395	6.39974	7.18777	7.0897	7.14291	7.75573	7.59269	7.92991	7.33266	7.11378	7.0578	6.64102	7.31461
Chtf8	8	106883863	106893601	-	0.041351	Chtf8	ENSMUSG00000046691	CTF8, chromosome transmission fidelity factor 8 homolog (S. cerevisiae) [Source:MGI Symbol;Acc:MGI:2443370]	gene	overlapping	0	5.05821	2.90566	5.24574	4.49464	4.94562	5.36873	4.72286	5.33082	5.54676	4.78762	6.30757	5.83273	5.75411	5.73901	6.49469	6.1707	6.56878	4.67773	4.63558	3.51884
Nedd4l	18	64887756	65217826	+	0.000155384	Nedd4l	ENSMUSG00000024589	neural precursor cell expressed, developmentally down-regulated gene 4-like [Source:MGI Symbol;Acc:MGI:1933754]	gene	overlapping	0	6.60074	6.52192	6.23959	6.83625	6.39103	6.40076	6.01948	7.10619	7.00305	6.78222	7.63802	6.18338	7.21619	6.85343	7.50042	8.1921	8.05421	6.86996	7.203	7.81579
Cnot6	11	49671503	49712723	-	0.0034798	Cnot6	ENSMUSG00000020362	CCR4-NOT transcription complex, subunit 6 [Source:MGI Symbol;Acc:MGI:2144529]	gene	overlapping	0	5.29842	6.52192	5.35222	6.53283	6.16186	5.97431	5.65873	5.63791	6.06341	6.04646	6.35349	6.33658	6.03859	6.4435	5.53989	6.72449	6.98854	7.62014	7.23499	7.55144
Psme1	14	55578123	55581529	+	0.00142626	Psme1	ENSMUSG00000022216	proteasome (prosome, macropain) 28 subunit, alpha [Source:MGI Symbol;Acc:MGI:1096367]	gene	overlapping	0	5.19761	5.01528	5.71352	4.61914	5.26386	5.39588	4.86227	4.24084	5.33925	6.34358	5.88082	5.67137	6.37851	6.41605	6.57108	5.8493	6.67586	5.33715	6.21763	5.79705
Pbrm1	14	31019138	31121592	+	0.000307986	Pbrm1	ENSMUSG00000042323	polybromo 1 [Source:MGI Symbol;Acc:MGI:1923998]	gene	overlapping	0	4.59354	6.77147	5.98394	5.24884	6.1645	5.29722	5.19177	5.92248	6.03908	6.02835	7.43229	6.25349	6.04391	6.54676	6.95725	6.46632	6.65597	6.97519	5.76872	6.86638
Plcxd1	5	110099969	110105953	+	0.000426539	Plcxd1	ENSMUSG00000064247	phosphatidylinositol-specific phospholipase C, X domain containing 1 [Source:MGI Symbol;Acc:MGI:2685422]	gene	overlapping	0	5.73105	4.28709	5.82866	5.01848	5.16714	4.67915	4.71237	6.38676	5.47965	6.04045	6.96458	6.29471	6.67583	6.05595	6.44208	6.28392	6.39826	5.52498	5.7099	6.06562
8430427H17Rik	2	153407462	153529971	-	0.00234526	8430427H17Rik	ENSMUSG00000061411	RIKEN cDNA 8430427H17 gene [Source:MGI Symbol;Acc:MGI:1918765]	gene	overlapping	0	4.83233	6.35122	6.59805	7.24517	7.06487	6.76401	6.53915	6.70157	5.42812	6.07908	6.97931	7.16632	8.09855	7.59422	6.7644	7.2965	7.67147	7.07198	6.77763	7.31151
Egln1	8	124908596	124949254	-	0.00439177	Egln1	ENSMUSG00000031987	EGL nine homolog 1 (C. elegans) [Source:MGI Symbol;Acc:MGI:1932286]	gene	overlapping	0	6.13456	7.12534	7.45934	7.12131	6.30989	6.51549	5.60302	6.37379	7.3472	7.09222	7.72503	6.40149	7.94371	7.38807	7.59805	8.38027	8.35503	7.0277	6.41082	7.74104
Hsbp1	8	119344538	119348927	+	0.00137235	Hsbp1	ENSMUSG00000031839	heat shock factor binding protein 1 [Source:MGI Symbol;Acc:MGI:1915446]	gene	overlapping	0	6.08924	6.20463	6.82455	5.73898	5.0291	5.90039	5.27968	4.73238	6.45227	6.28631	7.60201	6.87659	7.00493	5.86362	6.33073	6.23447	7.00086	6.77862	6.70368	6.91832
St3gal6	16	58468125	58524243	-	0.0326565	St3gal6	ENSMUSG00000022747	ST3 beta-galactoside alpha-2,3-sialyltransferase 6 [Source:MGI Symbol;Acc:MGI:1888707]	gene	overlapping	0	2.47325	4.11716	2.49851	3.70727	4.34523	4.9628	4.56854	4.42812	4.16133	4.70642	4.56671	4.74081	5.84519	4.22957	5.00773	5.18743	5.54493	3.89046	5.20447	4.83645
2210016F16Rik	13	58380046	58385225	-	0.00164055	2210016F16Rik	ENSMUSG00000021550	RIKEN cDNA 2210016F16 gene [Source:MGI Symbol;Acc:MGI:1917403]	gene	overlapping	0	5.11961	6.26136	5.08347	5.26345	5.43543	4.77251	3.95419	6.59386	5.5605	5.99455	6.75528	6.37553	6.30517	6.66807	6.98339	5.9434	6.70843	6.14084	5.50568	5.97827
Rbfa	18	80192265	80200658	-	3.76512e-05	Rbfa	ENSMUSG00000024570	ribosome binding factor A [Source:MGI Symbol;Acc:MGI:1915981]	gene	overlapping	0	5.62211	5.43909	6.47513	5.28509	4.67643	4.54886	5.72286	5.18996	5.45043	5.6123	6.80571	6.45867	6.25565	6.69258	6.50612	6.36519	6.2674	5.80663	5.18673	6.23247
Slc38a10	11	120103960	120151346	-	0.0341908	Slc38a10	ENSMUSG00000061306	solute carrier family 38, member 10 [Source:MGI Symbol;Acc:MGI:1919305]	gene	overlapping	0	4.17851	2.65773	4.46726	4.69655	5.82733	5.4032	5.41524	4.37705	3.43932	4.62842	5.70893	5.63681	6.17076	5.50504	6.16749	5.35597	4.6199	5.4793	5.02311	5.45556
A030003K02Rik	11	78030012	78032665	-	0.00117454	A030003K02Rik	ENSMUSG00000087050	RIKEN cDNA A030003K02 gene [Source:MGI Symbol;Acc:MGI:1924478]	gene	overlapping	0	4.13951	5.46509	4.27612	4.03134	3.47849	4.252	4.18419	4.87725	4.93216	4.68346	5.85975	5.7217	5.37007	5.20573	5.99966	4.98226	4.42464	4.57289	4.91594	5.60503
Tet1	10	62804570	62899118	-	0.000735651	Tet1	ENSMUSG00000047146	tet methylcytosine dioxygenase 1 [Source:MGI Symbol;Acc:MGI:1098693]	gene	overlapping	0	5.4335	7.17343	6.94854	7.11125	7.45173	6.90384	6.55392	7.48651	6.94662	7.69594	8.6724	7.88827	7.88718	7.57729	6.98475	7.60039	7.06598	8.36985	7.93156	8.1203
Sap30	8	57482707	57487860	-	0.0434019	Sap30	ENSMUSG00000031609	sin3 associated polypeptide [Source:MGI Symbol;Acc:MGI:1929129]	gene	overlapping	0	1.40912	5.60025	4.18941	3.42487	3.39103	3.7459	3.78426	3.95767	4.21444	3.30649	4.82757	5.47995	5.75411	4.79069	4.38748	3.74864	3.98854	5.01308	4.83854	4.31694
AU022252	4	119203570	119232712	-	0.000819097	AU022252	ENSMUSG00000078584	expressed sequence AU022252 [Source:MGI Symbol;Acc:MGI:2140466]	gene	overlapping	0	4.07897	5.78185	5.34077	5.63608	4.96392	5.66907	5.49086	4.59386	5.44303	5.32639	6.20274	5.44375	6.7638	6.49359	6.14328	5.91606	6.54012	5.27166	5.62464	6.13047
Palm	10	79793572	79820896	+	0.0373756	Palm	ENSMUSG00000035863	paralemmin [Source:MGI Symbol;Acc:MGI:1261814]	gene	overlapping	0	2.47325	4.06712	4.89279	4.78021	3.98797	4.57933	4.58012	4.13722	3.69739	3.28631	3.35725	4.18538	4.96767	4.34323	4.30259	5.83345	5.90483	5.18893	4.61362	5.48066
Lrrfip2	9	111118111	111225668	+	9.29152e-05	Lrrfip2	ENSMUSG00000032497	leucine rich repeat (in FLII) interacting protein 2 [Source:MGI Symbol;Acc:MGI:1918518]	gene	overlapping	0	5.03715	5.57062	5.86108	5.67212	5.59658	5.10719	4.82379	6.13338	5.40926	6.32144	6.72939	6.06923	6.49754	5.28752	6.61751	6.53327	7.14425	6.24233	5.93908	6.55604
Stx7	10	24149317	24188959	+	0.0168078	Stx7	ENSMUSG00000019998	syntaxin 7 [Source:MGI Symbol;Acc:MGI:1858210]	gene	overlapping	0	6.40501	4.50322	5.23341	6.14419	5.15656	5.41531	5.55685	4.13722	5.46146	5.31647	6.66711	6.33658	5.62533	6.16096	4.85513	6.24849	7.24389	5.92495	6.50925	6.02829
Fancm	12	65075606	65132058	+	1.20481e-06	Fancm	ENSMUSG00000055884	Fanconi anemia, complementation group M [Source:MGI Symbol;Acc:MGI:2442306]	gene	overlapping	0	6.34629	7.50165	6.81424	6.9147	6.6503	6.55982	6.75133	6.63791	7.29473	7.07173	8.16138	7.59992	7.69369	7.65566	7.82044	7.09626	7.20638	7.92779	7.12365	8.23452
Homer2	7	81600481	81706925	-	0.0340635	Homer2	ENSMUSG00000025813	homer homolog 2 (Drosophila) [Source:MGI Symbol;Acc:MGI:1347354]	gene	overlapping	0	5.91547	4.92452	3.59805	5.03985	5.1298	4.76874	4.66962	5.93136	4.18813	5.53317	2.90157	5.88275	6.35091	5.84316	6.26494	5.99894	6.60613	5.73068	5.63121	6.00734
Rab5c	11	100715009	100738215	-	2.65228e-06	Rab5c	ENSMUSG00000019173	RAB5C, member RAS oncogene family [Source:MGI Symbol;Acc:MGI:105306]	gene	overlapping	0	7.36543	6.34073	7.34077	6.53434	6.53874	6.67311	7.04479	7.06241	6.97255	6.99143	8.26214	7.39548	7.65254	7.78601	8.123	7.84799	8.34885	7.13348	6.69952	7.19337
Rexo2	9	48468514	48480611	-	0.0105089	Rexo2	ENSMUSG00000032026	REX2, RNA exonuclease 2 homolog (S. cerevisiae) [Source:MGI Symbol;Acc:MGI:1888981]	gene	overlapping	0	3.62211	5.30159	4.41362	4.65283	3.85046	3.75355	3.78426	4.19734	3.52591	4.48529	5.45879	4.85546	5.85126	5.20171	4.14572	3.24049	5.11053	5.60869	4.55029	5.08937
Dusp14	11	84048041	84069261	-	0.00529227	Dusp14	ENSMUSG00000018648	dual specificity phosphatase 14 [Source:MGI Symbol;Acc:MGI:1927168]	gene	overlapping	0	6.20707	7.63787	6.28212	6.93196	7.18285	5.87781	7.08601	4.58263	6.2782	5.99455	8.12102	7.39461	7.243	7.60338	7.61751	7.29457	7.60383	7.26045	6.47068	6.96054
Tacc1	8	25154552	25201449	-	0.00279359	Tacc1	ENSMUSG00000065954	transforming, acidic coiled-coil containing protein 1 [Source:MGI Symbol;Acc:MGI:2443510]	gene	overlapping	0	4.51954	5.34423	5.22721	4.1303	5.63896	4.65891	5.18419	4.81145	3.91622	4.55442	4.57965	5.36501	6.18045	5.60566	6.06555	6.67938	5.36596	5.12609	5.59356	5.22093
2610318N02Rik	16	17113399	17125106	-	0.0121072	2610318N02Rik	ENSMUSG00000049916	RIKEN cDNA 2610318N02 gene [Source:MGI Symbol;Acc:MGI:1917708]	gene	overlapping	0	5.22581	3.51571	3.93908	4.42487	5.31228	4.86019	5.29382	4.19734	4.83376	5.54596	6.69413	4.8704	5.30074	5.7223	5.24461	5.79303	6.00611	5.412	5.54566	4.79705
Zfand2b	1	75168646	75171629	+	0.0014267	Zfand2b	ENSMUSG00000026197	zinc finger, AN1 type domain 2B [Source:MGI Symbol;Acc:MGI:1916068]	gene	overlapping	0	4.44154	6.11716	6.04871	5.90891	4.18804	5.50419	5.53915	4.7425	4.94269	5.32639	5.80571	6.48805	6.46622	6.41778	6.28278	6.19985	6.67147	5.39159	5.67216	6.18067
2310035C23Rik	1	105663861	105755131	+	0.0130075	2310035C23Rik	ENSMUSG00000026319	RIKEN cDNA 2310035C23 gene [Source:MGI Symbol;Acc:MGI:1922832]	gene	overlapping	0	4.79518	6.33016	5.86108	5.27431	5.22897	4.562	4.98938	4.67009	3.7936	4.27612	6.73519	5.67705	5.15612	5.30259	6.02108	5.14952	5.43506	7.02108	5.51282	6.06562
Get4	5	139252324	139270051	+	7.35507e-07	Get4	ENSMUSG00000025858	golgi to ER traffic protein 4 homolog (S. cerevisiae) [Source:MGI Symbol;Acc:MGI:1914854]	gene	overlapping	0	6.76987	6.37883	6.53413	5.89959	5.26386	5.74973	6.34566	6.18254	6.67388	5.95674	7.33071	7.39634	6.98297	6.7473	7.45098	6.8201	6.99911	6.91926	6.41082	6.95459
Ints6	14	62676330	62761112	-	0.000527184	Ints6	ENSMUSG00000035161	integrator complex subunit 6 [Source:MGI Symbol;Acc:MGI:1202397]	gene	overlapping	0	5.73759	7.01088	6.41908	4.92508	6.81729	5.59219	6.14572	6.90456	6.25092	5.93747	6.65799	7.04198	6.69115	6.27802	6.78802	7.35412	7.44282	7.76202	6.73453	7.4903
RP23-71I22.6	12	22115756	22156646	-	0.0393499	RP23-71I22.6	ENSMUSG00000093846	No description	gene	overlapping	0	3.07897	2.18129	3.09715	3.46335	3.27856	2.90555	3.34226	3.62702	3.04886	3.38449	4.387	3.62804	3.65688	3.35773	4.47543	4.51019	3.6199	5.08092	1.96533	2.70068
Fermt2	14	45458792	45530118	-	0.000192136	Fermt2	ENSMUSG00000037712	fermitin family homolog 2 (Drosophila) [Source:MGI Symbol;Acc:MGI:2385001]	gene	overlapping	0	6.2489	7.8684	6.1341	6.70861	7.07051	6.72171	7.15156	6.4835	6.59095	7.08931	7.86108	6.69955	7.57667	7.74592	7.36881	8.22285	7.69224	7.11618	7.97009	7.96598
Pigx	16	32084420	32099738	-	4.35866e-05	Pigx	ENSMUSG00000023791	phosphatidylinositol glycan anchor biosynthesis, class X [Source:MGI Symbol;Acc:MGI:1919334]	gene	overlapping	0	6.36754	6.92919	6.45404	6.24333	5.33589	5.22473	5.89974	6.28653	5.9028	6.30398	7.51713	6.92274	7.01579	7.12962	7.22513	6.97385	7.26448	6.67773	5.59356	6.49578
Rab24	13	55319223	55321980	-	0.0145647	Rab24	ENSMUSG00000034789	RAB24, member RAS oncogene family [Source:MGI Symbol;Acc:MGI:105065]	gene	overlapping	0	3.62211	6.23893	5.65463	5.2707	4.25893	4.9661	4.43452	6.26562	5.82809	6.09657	6.75528	6.58186	6.73452	6.5703	6.55098	5.92357	6.36596	5.48316	5.60028	5.3506
Nucks1	1	131910458	131936321	+	0.000165902	Nucks1	ENSMUSG00000026434	nuclear casein kinase and cyclin-dependent kinase substrate 1 [Source:MGI Symbol;Acc:MGI:1934811]	gene	overlapping	0	6.13951	7.96607	7.23186	7.89138	6.87807	7.14332	7.11618	7.02142	7.25409	6.75862	8.41705	7.80642	7.38061	7.94869	7.45295	7.7903	8.46014	8.46619	7.53343	8.26933
Suv420h1	19	3767421	3818303	+	0.000226438	Suv420h1	ENSMUSG00000045098	suppressor of variegation 4-20 homolog 1 (Drosophila) [Source:MGI Symbol;Acc:MGI:2444557]	gene	overlapping	0	6.41321	7.09027	6.26707	6.8902	6.7291	6.57609	6.94077	6.54263	7.98279	7.43806	8.04492	7.43372	7.49463	7.94809	7.91283	8.06775	7.5581	7.22398	7.69691	7.96401
Cltc	11	86694351	86757565	-	0.030498	Cltc	ENSMUSG00000047126	clathrin, heavy polypeptide (Hc) [Source:MGI Symbol;Acc:MGI:2388633]	gene	overlapping	0	6.55702	6.61193	5.39159	7.14122	6.95632	7.01786	7.43611	5.72729	6.42249	4.87803	7.92584	6.66567	6.01444	6.85087	7.02373	8.04211	8.08264	7.13471	7.22851	7.54683
Capzb	4	139192899	139291818	+	0.0153715	Capzb	ENSMUSG00000028745	capping protein (actin filament) muscle Z-line, beta [Source:MGI Symbol;Acc:MGI:104652]	gene	overlapping	0	6.48885	5.07558	4.53915	5.04831	5.53671	5.99382	5.73846	4.7425	6.20354	6.27099	6.32304	5.7381	6.05184	6.34687	6.46765	7.3411	7.16942	5.92779	6.20594	6.40549
2510003E04Rik	10	62538626	62578457	-	3.05565e-08	2510003E04Rik	ENSMUSG00000036955	RIKEN cDNA 2510003E04 gene [Source:MGI Symbol;Acc:MGI:1919570]	gene	overlapping	0	5.33339	6.47151	6.80177	6.13428	5.74153	6.06321	6.06142	6.04615	6.00933	6.32886	6.70893	7.05294	7.18647	7.23154	7.09488	6.77101	6.73608	6.92637	6.49851	6.87271
Rfk	19	17394043	17401349	+	3.04247e-05	Rfk	ENSMUSG00000024712	riboflavin kinase [Source:MGI Symbol;Acc:MGI:1914688]	gene	overlapping	0	6.32907	7.72517	6.27612	6.98691	6.58874	6.74781	7.30783	7.75631	7.66357	7.49741	8.47706	7.90167	7.73288	7.70327	7.84616	8.18691	8.29196	7.87364	7.30175	7.97484
Rab10	12	3247430	3309969	-	2.39508e-09	Rab10	ENSMUSG00000020671	RAB10, member RAS oncogene family [Source:MGI Symbol;Acc:MGI:105066]	gene	overlapping	0	6.62564	8.22664	7.76369	7.5523	7.3429	7.42373	7.23822	7.70027	7.6395	7.66697	8.90736	8.22226	8.02388	8.32167	8.26494	8.22133	8.38556	8.50327	7.88465	8.44356
Dtnb	12	3572381	3781796	+	0.00465787	Dtnb	ENSMUSG00000071454	dystrobrevin, beta [Source:MGI Symbol;Acc:MGI:1203728]	gene	overlapping	0	4.21647	5.19689	4.83683	4.89724	5.77646	5.42732	5.94526	5.55417	5.18813	5.41269	6.42334	5.90953	6.45629	5.67098	7.11369	5.77378	6.04063	6.06039	4.46456	5.63017
Klhdc10	6	30401868	30455179	+	0.00783723	Klhdc10	ENSMUSG00000029775	kelch domain containing 10 [Source:MGI Symbol;Acc:MGI:1924038]	gene	overlapping	0	5.27162	5.15758	4.46726	6.02492	5.31703	5.54666	5.81401	6.29688	6.07781	6.36779	5.89123	5.91194	6.40766	6.06039	6.79269	7.13342	7.38355	5.52872	6.34171	6.54946
Cpt1a	19	3323301	3385732	+	0.0115992	Cpt1a	ENSMUSG00000024900	carnitine palmitoyltransferase 1a, liver [Source:MGI Symbol;Acc:MGI:1098296]	gene	overlapping	0	5.44154	5.70758	6.11069	5.16573	5.5769	6.01308	5.35581	5.65409	6.00933	5.62038	3.90157	6.33119	6.32713	6.19163	6.49469	6.71442	7.3048	7.26942	6.04625	5.9426
Pkig	2	163658386	163726158	+	1.49725e-05	Pkig	ENSMUSG00000035268	protein kinase inhibitor, gamma [Source:MGI Symbol;Acc:MGI:1343086]	gene	overlapping	0	5.78258	6.44563	5.79549	6.47908	5.62369	5.8848	6.37921	6.52514	6.36884	6.18369	7.52216	7.06382	7.3151	7.12856	6.58193	6.66153	7.26448	6.68614	5.65075	6.86638
Fbxl18	5	142866946	142895421	-	0.00348751	Fbxl18	ENSMUSG00000066640	F-box and leucine-rich repeat protein 18 [Source:MGI Symbol;Acc:MGI:2444450]	gene	overlapping	0	4.45748	5.30878	5.40265	4.5192	5.37288	5.93614	5.90436	4.54841	5.17032	5.48529	6.27214	5.34731	6.87977	5.51477	6.6315	6.28002	5.96357	5.77862	5.71816	5.38053
Pla2g4e	2	120166412	120245335	-	0.0177013	Pla2g4e	ENSMUSG00000050211	phospholipase A2, group IVE [Source:MGI Symbol;Acc:MGI:1919144]	gene	overlapping	0	5.07897	5.29436	5.91612	4.92048	5.28342	5.61757	5.27968	5.94895	2.94793	5.07908	6.84375	6.53884	6.69115	4.87375	6.40183	5.51019	6.01655	6.01842	5.13525	5.08575
Tada1	1	166379097	166393621	+	2.58996e-07	Tada1	ENSMUSG00000026563	transcriptional adaptor 1 [Source:MGI Symbol;Acc:MGI:1196415]	gene	overlapping	0	5.9665	7.26876	7.16851	6.69115	6.17239	6.67008	6.26898	6.99202	6.72815	6.64436	8.29487	7.46196	7.17924	6.90123	7.50327	7.45427	7.72338	7.30695	7.03307	7.38718
Gtf3a	5	146948657	146955614	+	0.000149584	Gtf3a	ENSMUSG00000016503	general transcription factor III A [Source:MGI Symbol;Acc:MGI:1913846]	gene	overlapping	0	5.5496	6.07136	5.48297	5.43781	5.51619	5.31801	5.41524	6.12952	5.03908	5.90144	5.85444	6.51367	7.06235	6.88505	5.93345	6.22032	6.95636	5.63671	5.60251	6.27452
Me1	9	86581363	86695914	-	0.00132119	Me1	ENSMUSG00000032418	malic enzyme 1, NADP(+)-dependent, cytosolic [Source:MGI Symbol;Acc:MGI:97043]	gene	overlapping	0	7.29398	6.87448	5.28809	6.02492	7.14859	7.20533	7.34226	6.79208	6.11553	7.15893	6.98661	7.51525	7.50237	7.79802	7.61926	7.74158	8.05674	7.6752	7.16952	7.74622
6330578E17Rik	1	37417084	37430103	-	0.000227804	6330578E17Rik	ENSMUSG00000026112	RIKEN cDNA 6330578E17 gene [Source:MGI Symbol;Acc:MGI:1923428]	gene	overlapping	0	7.05821	5.72382	6.26101	6.11629	5.23401	5.8848	5.93175	6.40281	6.18813	6.99765	7.14733	6.91074	7.0883	7.40212	6.7028	6.87534	7.29339	7.40693	6.49851	6.71367
Lactb	9	66955393	66975484	-	0.00015959	Lactb	ENSMUSG00000032370	lactamase, beta [Source:MGI Symbol;Acc:MGI:1933395]	gene	overlapping	0	5.50428	6.84261	6.20212	5.80788	5.94869	4.78002	5.8858	5.84942	5.48326	6.63042	7.47446	7.05404	7.18887	6.55936	6.4657	6.4193	6.51824	6.33715	6.74062	6.24879
AW146020	6	81923669	81959915	+	0.00400105	AW146020	ENSMUSG00000035125	expressed sequence AW146020 [Source:MGI Symbol;Acc:MGI:2141656]	gene	overlapping	0	4.99408	4.3992	4.61715	4.04831	4.03489	4.13968	4.98938	4.7823	4.28235	4.58778	4.14733	5.76235	5.78617	5.86362	4.48316	4.69701	5.32174	4.285	5.33903	5.8081
2410004B18Rik	3	145938014	145944829	+	0.0239915	2410004B18Rik	ENSMUSG00000036873	RIKEN cDNA 2410004B18 gene [Source:MGI Symbol;Acc:MGI:1913671]	gene	overlapping	0	5.1296	7.08818	5.79968	5.25981	5.28342	4.9628	4.58012	6.42498	5.57072	6.07026	7.44295	6.70094	6.83296	7.17126	7.06297	5.95809	5.25863	5.97519	5.27332	6.17385
Tnrc18	5	142750380	142817662	-	0.00271666	Tnrc18	ENSMUSG00000039477	trinucleotide repeat containing 18 [Source:MGI Symbol;Acc:MGI:3648294]	gene	overlapping	0	5.97759	6.10894	5.8967	5.7442	6.21121	6.54556	6.22905	6.42812	6.88106	6.18369	7.02732	6.66852	6.68946	6.85981	6.33287	7.86628	7.95455	5.92211	6.48285	6.92747
Ppm1b	17	84956741	85023991	+	7.09584e-06	Ppm1b	ENSMUSG00000061130	protein phosphatase 1B, magnesium dependent, beta isoform [Source:MGI Symbol;Acc:MGI:101841]	gene	overlapping	0	7.09434	7.98191	7.46857	7.65144	7.3312	7.3031	7.08601	7.03384	7.5968	6.67184	8.50021	7.3972	8.05513	8.23547	7.71927	7.78069	8.33709	8.71804	7.83094	8.08256
1700012B15Rik	12	3235504	3250377	+	4.95648e-05	1700012B15Rik	ENSMUSG00000079179	RIKEN cDNA 1700012B15 gene [Source:MGI Symbol;Acc:MGI:1921423]	gene	overlapping	0	5.15914	6.59142	6.37765	5.87125	6.03777	6.13968	6.02797	6.36726	5.60428	6.37019	7.15815	6.96282	6.99673	6.61474	7.60338	6.378	6.61074	5.82196	6.59469	7.03301
Vps37a	8	40511783	40551134	+	2.80311e-06	Vps37a	ENSMUSG00000031600	vacuolar protein sorting 37A (yeast) [Source:MGI Symbol;Acc:MGI:1261835]	gene	overlapping	0	5.76347	6.20076	6.73117	6.44103	5.66529	5.88654	6.17658	6.80663	6.7478	6.56702	7.94597	7.27705	6.77822	7.20272	6.90061	6.99181	7.12186	6.74684	6.55951	6.88842
Bbx	16	50191844	50432390	-	0.0285979	Bbx	ENSMUSG00000022641	bobby sox homolog (Drosophila) [Source:MGI Symbol;Acc:MGI:1917758]	gene	overlapping	0	3.62211	7.46991	5.27009	6.19841	6.1645	6.33342	6.82623	5.65409	6.11553	6.35815	7.07379	7.0142	7.62356	6.60566	6.3004	6.45427	6.74866	6.9292	7.16727	7.54021
Birc6	17	74528295	74703773	+	0.00840115	Birc6	ENSMUSG00000024073	baculoviral IAP repeat-containing 6 [Source:MGI Symbol;Acc:MGI:1276108]	gene	overlapping	0	3.80767	5.27244	5.5541	5.0356	5.0291	5.33086	4.99804	5.41552	5.25303	5.60009	6.97196	4.70234	6.5244	6.0062	5.55465	5.63738	5.45567	6.4793	5.29003	5.13223
2410022L05Rik	8	13884788	13890271	-	0.0259566	2410022L05Rik	ENSMUSG00000031458	RIKEN cDNA 2410022L05 gene [Source:MGI Symbol;Acc:MGI:1913673]	gene	overlapping	0	4.97206	6.18521	4.43532	4.98801	4.3545	4.38607	3.95419	4.605	5.1015	5.21338	5.63648	6.27424	5.37851	4.62076	6.13839	4.95809	6.58056	5.89046	4.40955	5.5349
Dusp11	6	85942268	85961667	-	0.0368657	Dusp11	ENSMUSG00000030002	dual specificity phosphatase 11 (RNA/RNP complex 1-interacting) [Source:MGI Symbol;Acc:MGI:1919352]	gene	overlapping	0	5.59354	5.10067	3.81217	5.7494	5.92397	5.75164	5.44089	5.82103	5.86177	6.34114	6.33453	5.41345	5.51103	6.00159	6.58552	7.11933	6.77144	5.01842	6.47678	7.14798
Sh3glb1	3	144688844	144720323	-	0.00847359	Sh3glb1	ENSMUSG00000037062	SH3-domain GRB2-like B1 (endophilin) [Source:MGI Symbol;Acc:MGI:1859730]	gene	overlapping	0	4.97206	6.47151	6.34937	4.20789	4.93947	5.31543	5.06555	6.56277	5.02428	6.08785	6.507	6.15314	6.20911	5.99232	4.98066	6.75707	6.94729	6.5137	6.54798	6.85363
Eri1	8	35465265	35495533	-	0.000426539	Eri1	ENSMUSG00000031527	exoribonuclease 1 [Source:MGI Symbol;Acc:MGI:1914526]	gene	overlapping	0	5.03715	7.58699	6.879	6.88785	6.88288	6.35244	7.23272	7.39159	6.33526	7.26456	8.00711	7.759	7.06758	6.983	7.46472	7.69992	7.91789	7.97313	7.57095	7.75196
Raly	2	154791096	154867261	+	0.00143414	Raly	ENSMUSG00000027593	hnRNP-associated with lethal yellow [Source:MGI Symbol;Acc:MGI:97850]	gene	overlapping	0	4.66393	5.84756	5.47775	5.76232	5.93019	5.81519	5.89046	5.67009	5.31919	5.53744	6.69115	5.42024	6.70966	5.84058	7.07582	6.47315	6.80596	6.32428	5.02976	6.07297
Zfp280d	9	72274899	72363770	+	0.0471609	Zfp280d	ENSMUSG00000038535	zinc finger protein 280D [Source:MGI Symbol;Acc:MGI:2384583]	gene	overlapping	0	6.5384	5.29436	6.12411	6.21917	5.67643	6.34106	5.57434	6.38676	7.12712	7.06286	7.74383	6.42024	6.39939	6.12114	5.93908	7.04211	6.52313	7.01975	7.14906	8.41492
Bspry	4	62480053	62497298	+	0.00628037	Bspry	ENSMUSG00000028392	B-box and SPRY domain containing [Source:MGI Symbol;Acc:MGI:2177191]	gene	overlapping	0	5.57904	6.5281	6.60524	6.34298	7.36142	6.54996	5.66962	4.98351	5.85621	6.43577	7.53384	6.25728	7.43724	7.12962	7.48027	7.09958	6.62673	6.86404	6.97656	6.67796
2006-03-01	15	31455899	31531037	-	0.00176812	2006-03-01	ENSMUSG00000039100	membrane-associated ring finger (C3HC4) 6 [Source:MGI Symbol;Acc:MGI:2442773]	gene	overlapping	0	5.78889	6.16948	6.75293	7.49619	5.68749	6.15853	6.37256	6.87265	6.85761	6.775	7.28799	7.44125	7.28736	7.11048	6.80663	8.00012	7.5829	6.83713	6.70264	7.61451
Ube2q2	9	55148854	55207529	+	0.0226302	Ube2q2	ENSMUSG00000032307	ubiquitin-conjugating enzyme E2Q (putative) 2 [Source:MGI Symbol;Acc:MGI:2388672]	gene	overlapping	0	6.02115	7.03711	6.13741	7.22572	6.29069	5.71487	6.16893	6.89097	6.19255	6.60824	6.45879	7.25253	5.85731	6.27802	6.45394	6.63281	8.45567	7.72662	7.29349	7.80479
Ccdc73	2	104867805	105017904	+	0.0303599	Ccdc73	ENSMUSG00000045106	coiled-coil domain containing 73 [Source:MGI Symbol;Acc:MGI:3606488]	gene	overlapping	0	3.59354	5.00646	3.32342	3.28867	3.3545	3.38113	4.36923	3.90456	3.23172	3.64436	4.05769	4.66852	4.35732	3.31379	5.32858	4.63128	5.1299	3.58012	3.42476	5.33845
Rock2	12	16894978	16988274	+	0.0268041	Rock2	ENSMUSG00000020580	Rho-associated coiled-coil containing protein kinase 2 [Source:MGI Symbol;Acc:MGI:107926]	gene	overlapping	0	3.97206	5.28709	3.47775	5.09806	5.87323	5.30765	5.67504	6.00469	5.7463	5.47196	6.95964	5.63973	5.53387	6.27421	5.06039	5.66153	6.29625	6.65051	5.84609	5.97435
Nol7	13	43398376	43402858	+	0.000250154	Nol7	ENSMUSG00000063200	nucleolar protein 7 [Source:MGI Symbol;Acc:MGI:1917328]	gene	overlapping	0	6.15914	7.96037	7.62661	6.16184	6.19064	6.30244	7.04479	7.35742	6.89061	6.77862	8.53965	7.64263	7.27499	7.66224	7.68446	7.5568	8.09419	7.73797	6.86852	7.38939
Mtmr12	15	12205028	12272240	+	0.00434904	Mtmr12	ENSMUSG00000039458	myotubularin related protein 12 [Source:MGI Symbol;Acc:MGI:2443034]	gene	overlapping	0	5.28954	4.03277	4.95419	5.63327	5.38199	5.15709	5.35581	4.19734	4.14319	4.98206	5.74957	4.92393	6.17561	5.90123	5.65051	5.46289	5.4454	6.13594	5.81756	5.6983
Zmym3	X	101404384	101420849	-	0.0435419	Zmym3	ENSMUSG00000031310	zinc finger, MYM-type 3 [Source:MGI Symbol;Acc:MGI:1927231]	gene	overlapping	0	6.05821	5.82766	6.33212	5.80289	5.82399	7.02499	6.09816	5.28307	4.29062	3.73648	6.63338	6.12847	6.56192	6.36133	6.82957	6.71154	6.05758	7.21123	6.06093	6.93152
Cebpa	7	35119293	35121926	+	0.0452867	Cebpa	ENSMUSG00000034957	CCAAT/enhancer binding protein (C/EBP), alpha [Source:MGI Symbol;Acc:MGI:99480]	gene	overlapping	0	5.5496	5.13347	4.84496	6.08373	5.70935	5.11315	5.05728	5.18254	7.20244	5.0732	5.9372	6.53728	6.49948	6.34687	5.34566	6.90346	6.46077	6.22398	6.82044	6.46956
Tmed1	9	21507380	21510186	-	0.0189924	Tmed1	ENSMUSG00000032180	transmembrane emp24 domain containing 1 [Source:MGI Symbol;Acc:MGI:106201]	gene	overlapping	0	4.67761	4.62352	5.68211	5.90192	5.84718	5.61127	5.46609	5.18996	6.44489	6.61432	5.59247	6.60588	6.61466	6.53883	6.20071	6.98226	7.14425	5.90781	5.99281	6.28722
Rac1	5	143505478	143528036	-	2.06272e-05	Rac1	ENSMUSG00000001847	RAS-related C3 botulinum substrate 1 [Source:MGI Symbol;Acc:MGI:97845]	gene	overlapping	0	6.5754	7.8769	6.71352	6.52679	5.82733	6.22473	6.51521	7.26913	6.8224	7.09657	7.79188	7.73197	7.44227	7.35683	7.34566	7.68012	7.95002	7.61838	7.0405	7.55341
Klf5	14	99298691	99313405	+	1.26537e-05	Klf5	ENSMUSG00000005148	Kruppel-like factor 5 [Source:MGI Symbol;Acc:MGI:1338056]	gene	overlapping	0	6.10956	6.60318	7.03101	6.63046	6.63896	6.33469	5.90896	7.37053	7.08139	7.17548	8.05654	7.35707	7.58398	7.40823	7.35517	7.21523	7.94911	7.43312	7.02395	6.93253
Uqcrfs1	13	30540308	30545362	-	0.000423367	Uqcrfs1	ENSMUSG00000038462	ubiquinol-cytochrome c reductase, Rieske iron-sulfur polypeptide 1 [Source:MGI Symbol;Acc:MGI:1913944]	gene	overlapping	0	5.94969	7.40928	6.53665	5.71792	5.81057	5.78377	6.31131	7.13722	6.70977	7.05841	7.88082	7.42615	7.32931	7.29225	7.49086	6.62975	7.56404	7.16989	6.38123	7.04987
Ubn2	6	38433950	38524825	+	0.00142626	Ubn2	ENSMUSG00000038538	ubinuclein 2 [Source:MGI Symbol;Acc:MGI:2444236]	gene	overlapping	0	5.81387	7.40088	5.93908	6.45223	6.00279	6.38483	7.06555	6.36399	5.69739	5.51594	7.04375	7.20909	7.48294	7.69044	6.75005	6.60039	6.63579	7.06168	6.65291	7.38349
Nubp1	16	10411948	10424428	+	0.0134038	Nubp1	ENSMUSG00000022503	nucleotide binding protein 1 [Source:MGI Symbol;Acc:MGI:1347073]	gene	overlapping	0	4.98311	6.67175	4.98394	5.77001	5.30272	5.54225	5.44089	6.48048	6.31311	6.54383	6.95468	6.8704	6.1512	6.26077	7.2627	7.0201	7.22601	5.79113	5.407	6.34757
Dnttip1	2	164745983	164768607	+	0.00424183	Dnttip1	ENSMUSG00000017299	deoxynucleotidyltransferase, terminal, interacting protein 1 [Source:MGI Symbol;Acc:MGI:1923483]	gene	overlapping	0	5.41729	5.9104	6.04518	5.03985	4.53671	5.562	5.36923	6.12179	5.7493	5.85081	7.15383	6.95933	6.47411	5.82501	7.09235	5.45945	5.75491	6.00504	5.59132	5.66464
Pard6a	8	105701154	105703493	+	0.0239651	Pard6a	ENSMUSG00000005699	par-6 (partitioning defective 6,) homolog alpha (C. elegans) [Source:MGI Symbol;Acc:MGI:1927223]	gene	overlapping	0	4.5496	5.13347	3.27612	4.41182	3.04638	4.42971	4.43452	4.54841	4.49762	4.28631	6.17317	5.02538	5.56007	4.80134	4.81278	4.08849	5.45054	4.60869	4.80792	4.03771
Tle4	19	14448072	14598051	-	0.0057115	Tle4	ENSMUSG00000024642	transducin-like enhancer of split 4, homolog of Drosophila E(spl) [Source:MGI Symbol;Acc:MGI:104633]	gene	overlapping	0	5.69115	7.71843	7.21315	7.75781	7.5956	6.15421	6.45983	7.58544	7.73195	7.54171	8.54461	7.34998	7.86784	8.02732	7.4696	8.21472	7.42986	8.08728	7.90378	8.55931
Tm2d2	8	25017211	25023259	+	0.00987718	Tm2d2	ENSMUSG00000031556	TM2 domain containing 2 [Source:MGI Symbol;Acc:MGI:1916992]	gene	overlapping	0	5.51193	5.14155	4.72678	4.30288	5.14592	3.49509	4.31478	4.58263	5.01931	4.75862	5.40165	5.69955	4.70464	5.83541	4.69115	5.71442	6.2674	4.52872	5.15667	5.90602
Elavl1	8	4284782	4325100	-	0.000605882	Elavl1	ENSMUSG00000040028	ELAV (embryonic lethal, abnormal vision, Drosophila)-like 1 (Hu antigen R) [Source:MGI Symbol;Acc:MGI:1100851]	gene	overlapping	0	6.4335	6.76102	5.86508	6.25981	5.36831	6.32573	6.09412	7.16759	6.68646	7.20669	7.751	6.62364	7.29072	6.85087	7.00236	6.91731	7.71165	7.11244	6.89425	7.53955
Atp6v0a1	11	101009452	101063719	+	0.0031924	Atp6v0a1	ENSMUSG00000019302	ATPase, H+ transporting, lysosomal V0 subunit A1 [Source:MGI Symbol;Acc:MGI:103286]	gene	overlapping	0	5.35908	5.04144	6.02386	5.93424	6.07192	5.52893	5.4847	5.00889	5.05372	6.14499	6.54378	6.37203	5.56377	5.49523	6.81432	6.97626	6.68898	5.63323	6.10094	6.24717
1110008F13Rik	2	156863128	156873563	+	0.00894529	1110008F13Rik	ENSMUSG00000027637	RIKEN cDNA 1110008F13 gene [Source:MGI Symbol;Acc:MGI:1914638]	gene	overlapping	0	5.71124	6.65773	5.18301	5.02706	4.89565	4.87079	5.16893	5.89551	5.49762	5.68731	6.64574	6.66138	6.89014	6.44179	6.63844	5.14524	6.51087	5.77547	4.94788	5.64257
Rest	5	77265491	77286432	+	7.46145e-05	Rest	ENSMUSG00000029249	RE1-silencing transcription factor [Source:MGI Symbol;Acc:MGI:104897]	gene	overlapping	0	7.51384	8.22188	7.06445	8.04197	8.52648	7.46918	7.75517	7.63791	7.4356	7.53851	9.23019	8.02872	8.70799	8.34141	7.88901	8.23698	8.70951	8.60604	8.08427	8.41384
Vps29	5	122354369	122364984	+	0.0178778	Vps29	ENSMUSG00000029462	vacuolar protein sorting 29 (S. pombe) [Source:MGI Symbol;Acc:MGI:1928344]	gene	overlapping	0	3.83233	4.58847	4.91612	3.31696	4.03489	3.85664	3.72286	3.81145	3.73422	4.56283	3.44472	4.75162	5.41588	3.99	5.14572	4.39969	5.73818	4.32858	4.41464	4.98803
Socs4	14	47276931	47296098	+	0.0158569	Socs4	ENSMUSG00000048379	suppressor of cytokine signaling 4 [Source:MGI Symbol;Acc:MGI:1914546]	gene	overlapping	0	4.42542	6.53118	6.51388	5.29224	5.88609	5.65688	5.60302	6.33417	6.01433	5.81956	7.02259	7.06166	6.12386	6.58578	6.867	6.55438	5.071	7.52311	5.79041	5.87692
Wsb2	5	117357304	117378601	+	0.0387697	Wsb2	ENSMUSG00000029364	WD repeat and SOCS box-containing 2 [Source:MGI Symbol;Acc:MGI:2144041]	gene	overlapping	0	4.65013	6.06287	6.00222	5.00115	6.21631	5.4321	3.86227	5.13722	6.26357	5.62842	5.44472	5.86544	5.99536	6.81322	7.00101	6.23849	5.1741	6.7644	6.27051	6.13223
Thoc3	13	54458837	54468849	-	2.4767e-06	Thoc3	ENSMUSG00000025872	THO complex 3 [Source:MGI Symbol;Acc:MGI:1920916]	gene	overlapping	0	7.36754	7.38225	7.03634	7.00658	6.73621	6.47787	6.84316	7.54553	7.08496	7.10235	8.32976	8.05894	7.67754	7.58578	8.13716	7.56802	8.10972	7.52685	6.60585	7.4084
6330409N04Rik	14	61531993	61556886	-	0.00463057	6330409N04Rik	ENSMUSG00000021930	RIKEN cDNA 6330409N04 gene [Source:MGI Symbol;Acc:MGI:1913924]	gene	overlapping	0	6.67761	7.77017	6.94098	6.6234	4.93329	6.4487	6.22536	6.87034	6.92022	6.85253	8.06	7.3764	7.35412	7.42726	7.31239	7.54143	7.06598	7.56015	6.21033	7.84238
Atp6v1g1	4	63544772	63550750	+	0.0165596	Atp6v1g1	ENSMUSG00000039105	ATPase, H+ transporting, lysosomal V1 subunit G1 [Source:MGI Symbol;Acc:MGI:1913540]	gene	overlapping	0	5.76987	4.8769	5.49335	5.09806	5.10802	5.98897	6.19177	4.54841	5.87007	5.95355	7.02968	6.07785	6.04125	6.26846	5.48701	5.08403	6.6199	6.71434	6.30792	5.91832
Scrib	15	76047158	76069784	-	0.00355152	Scrib	ENSMUSG00000022568	scribbled homolog (Drosophila) [Source:MGI Symbol;Acc:MGI:2145950]	gene	overlapping	0	6.2806	5.92919	4.38045	5.01416	5.22392	5.4487	5.30084	5.42183	5.49404	4.98206	5.96212	5.89742	5.97604	5.93062	6.62801	6.19365	6.88026	5.96417	5.63993	5.3506
Zrsr2	X	163935443	163958661	-	0.0267292	Zrsr2	ENSMUSG00000031370	zinc finger (CCCH type), RNA binding motif and serine/arginine rich 2 [Source:MGI Symbol;Acc:MGI:103287]	gene	overlapping	0	5.54214	5.83266	7.05398	6.05882	6.26632	6.60282	5.28676	5.06645	5.73119	5.32144	6.63648	7.12536	6.75734	6.69829	6.31781	5.85455	5.2934	7.275	6.84797	6.99481
Pxmp2	5	110274282	110286186	-	0.000819097	Pxmp2	ENSMUSG00000029499	peroxisomal membrane protein 2 [Source:MGI Symbol;Acc:MGI:107487]	gene	overlapping	0	5.54214	5.72382	6.22721	6.42974	5.24403	5.22748	5.8858	5.63791	5.35511	5.77319	6.19014	6.79927	6.78775	6.66078	7.14937	5.90092	5.86686	6.30913	5.86852	6.0748
Maf1	15	76351294	76354380	+	0.0040724	Maf1	ENSMUSG00000022553	MAF1 homolog (S. cerevisiae) [Source:MGI Symbol;Acc:MGI:1916127]	gene	overlapping	0	6.17851	5.72382	6.16689	5.59624	4.87646	5.49052	4.5332	5.44682	5.56392	5.61635	6.17743	6.43036	5.88718	5.15267	6.54729	5.70864	6.98854	6.23318	5.9996	6.69711
Mtap7d2	X	159414572	159498757	+	0.00619551	Mtap7d2	ENSMUSG00000041020	MAP7 domain containing 2 [Source:MGI Symbol;Acc:MGI:1917474]	gene	overlapping	0	6.39263	6.55255	6.67529	6.88549	7.41229	7.19553	6.35581	6.7823	6.88925	6.48529	8.31725	7.66995	7.37641	6.35593	6.84616	6.9273	7.52313	8.25763	7.21545	6.96648
Clint1	11	45852051	45910625	+	0.00335039	Clint1	ENSMUSG00000006169	clathrin interactor 1 [Source:MGI Symbol;Acc:MGI:2144243]	gene	overlapping	0	5.37595	6.41262	5.87702	6.62481	6.26386	6.21229	6.56271	5.82103	6.47965	6.01921	7.66559	6.85044	6.44227	7.07691	5.91355	6.87405	6.03036	7.38025	6.56524	7.01785
Dmxl2	9	54365158	54501760	-	0.0463323	Dmxl2	ENSMUSG00000041268	Dmx-like 2 [Source:MGI Symbol;Acc:MGI:2444630]	gene	overlapping	0	5.17851	5.31594	6.32923	5.95689	6.40895	6.57393	6.94973	5.531	5.99928	5.71777	6.23582	6.69536	6.34015	7.48123	6.95168	6.36703	4.75906	7.61311	6.92042	6.6101
Fbxl6	15	76535730	76538746	-	0.0268874	Fbxl6	ENSMUSG00000022559	F-box and leucine-rich repeat protein 6 [Source:MGI Symbol;Acc:MGI:1354705]	gene	overlapping	0	4.97206	4.05005	6.71795	5.15402	4.89565	5.53338	4.89974	5.70675	6.12481	5.81252	6.88603	6.43204	6.53765	6.2913	6.12609	6.25247	6.4454	5.14084	5.86294	5.50803
Commd8	5	72157000	72168183	-	0.0328882	Commd8	ENSMUSG00000029213	COMM domain containing 8 [Source:MGI Symbol;Acc:MGI:1343485]	gene	overlapping	0	4.97206	4.61193	6.04518	6.01632	5.87967	5.67512	5.44089	5.22649	5.58424	5.67572	5.73808	5.22469	5.64644	5.50829	6.58552	5.22842	7.01308	7.08728	6.12908	6.61514
Gorasp2	2	70661576	70712636	+	0.000492257	Gorasp2	ENSMUSG00000014959	golgi reassembly stacking protein 2 [Source:MGI Symbol;Acc:MGI:2135962]	gene	overlapping	0	6.65705	6.53425	6.44337	6.05042	5.84059	5.79679	5.84796	6.65945	6.04153	6.33624	6.84375	7.79013	6.09087	6.20573	6.93203	7.04211	6.95274	7.24005	6.2118	6.98511
Fam105b	15	27605919	27630693	-	0.00106445	Fam105b	ENSMUSG00000046034	family with sequence similarity 105, member B [Source:MGI Symbol;Acc:MGI:3577015]	gene	overlapping	0	5.26257	7.33192	5.65925	5.80038	6.00279	5.7819	5.84796	6.53683	5.82525	6.59189	7.45879	6.45702	6.97464	6.47709	7.01308	6.58153	6.9123	7.1518	6.31881	6.68757
Agpat2	2	26593057	26604417	-	9.12228e-06	Agpat2	ENSMUSG00000026922	1-acylglycerol-3-phosphate O-acyltransferase 2 (lysophosphatidic acid acyltransferase, beta) [Source:MGI Symbol;Acc:MGI:1914762]	gene	overlapping	0	6.80767	7.23138	6.61715	6.73637	6.04352	6.9047	7.23089	7.13338	7.42906	7.21204	7.97442	7.59542	7.63593	7.57883	7.76123	7.50603	8.15768	7.59983	6.90423	7.32619
1700047I17Rik2	12	55199533	55214076	+	0.00154546	1700047I17Rik2	ENSMUSG00000094103	RIKEN cDNA 1700047I17 gene 2 [Source:MGI Symbol;Acc:MGI:3714351]	gene	overlapping	0	4.6079	5.97966	5.18301	5.68574	4.99984	5.01149	5.17658	4.75256	5.10619	5.53317	6.08517	6.23049	5.3869	6.11689	6.56926	5.97746	5.66926	5.96417	5.00636	5.51614
1810058I24Rik	6	35252654	35263496	+	0.0301836	1810058I24Rik	ENSMUSG00000073155	RIKEN cDNA 1810058I24 gene [Source:MGI Symbol;Acc:MGI:1914955]	gene	overlapping	0	4.91547	5.12534	4.83683	4.68031	4.89565	5.26812	4.54508	5.18996	4.86731	4.89145	5.74383	5.58941	5.81443	6.35593	6.37921	3.97746	5.86686	3.99155	5.31746	4.83645
Srpk2	5	23503356	23616571	-	0.0286576	Srpk2	ENSMUSG00000062604	serine/arginine-rich protein specific kinase 2 [Source:MGI Symbol;Acc:MGI:1201408]	gene	overlapping	0	5.69788	4.88655	5.23959	5.29934	5.19839	4.66298	4.73328	5.53683	5.53289	6.06138	6.52384	6.29286	6.74598	6.3249	4.62975	5.37069	4.5829	5.98066	5.66577	6.27452
Ccnd3	17	47505051	47599683	+	0.00877313	Ccnd3	ENSMUSG00000034165	cyclin D3 [Source:MGI Symbol;Acc:MGI:88315]	gene	overlapping	0	5.8922	7.34248	5.33501	6.47595	6.50164	5.85487	6.69649	5.50149	5.67861	6.11671	6.97442	6.57427	7.02388	5.85087	7.17706	6.93599	7.73397	6.78332	6.64643	6.76563
Arf6	12	69372150	69375979	+	1.24789e-05	Arf6	ENSMUSG00000044147	ADP-ribosylation factor 6 [Source:MGI Symbol;Acc:MGI:99435]	gene	overlapping	0	6.14936	6.63787	6.83071	6.26527	6.74153	6.04462	6.24005	7.03384	5.63057	6.20534	7.46752	7.38423	7.14997	7.27229	6.89916	6.65102	7.36051	6.16268	7.16047	6.88111
Gna13	11	109362831	109401369	+	0.0177961	Gna13	ENSMUSG00000020611	guanine nucleotide binding protein, alpha 13 [Source:MGI Symbol;Acc:MGI:95768]	gene	overlapping	0	4.82005	7.08609	6.09715	5.64169	6.49327	4.94953	5.88113	6.43438	5.39015	5.99143	6.01546	6.86419	6.25107	6.14642	6.36043	7.41398	7.38758	6.04479	6.05116	7.1959
Dennd5b	6	148988071	149101680	-	0.0238085	Dennd5b	ENSMUSG00000030313	DENN/MADD domain containing 5B [Source:MGI Symbol;Acc:MGI:2444273]	gene	overlapping	0	5.25347	6.02842	5.42992	5.39864	4.98797	6.1899	5.05728	6.28999	5.71899	5.80899	7.0715	5.43707	6.28287	5.90123	5.87291	6.41575	6.57114	4.58732	6.71816	6.93556
Rdx	9	52047150	52088737	+	0.0184194	Rdx	ENSMUSG00000032050	radixin [Source:MGI Symbol;Acc:MGI:97887]	gene	overlapping	0	4.98311	6.9385	5.86907	4.93424	5.80719	5.54225	5.40876	5.33752	5.35116	5.54596	6.55693	7.05513	6.46226	6.07362	4.89046	5.6675	7.08925	6.37298	5.94964	6.04334
B3gat2	1	23761753	23849158	+	0.0162451	B3gat2	ENSMUSG00000026156	beta-1,3-glucuronyltransferase 2 (glucuronosyltransferase S) [Source:MGI Symbol;Acc:MGI:2389490]	gene	overlapping	0	6.25803	5.81255	6.42451	6.07754	5.83729	6.28539	5.93175	6.76998	6.29268	6.84737	7.71481	6.32939	6.24416	6.53724	6.61751	6.97986	8.16786	5.71763	6.28448	7.01213
Gm12264	11	59775286	59780321	-	0.0283183	Gm12264	ENSMUSG00000086536	predicted gene 12264 [Source:MGI Symbol;Acc:MGI:3702404]	gene	overlapping	0	2.94969	3.30159	3.45669	4.42487	3.60826	4.08613	4.07377	3.10619	4.29884	4.01921	4.26414	4.60439	4.56377	4.7195	3.74362	4.96781	4.85527	4.31131	3.59581	4.39526
Rab2a	4	8535644	8607778	+	7.81611e-06	Rab2a	ENSMUSG00000047187	RAB2A, member RAS oncogene family [Source:MGI Symbol;Acc:MGI:1928750]	gene	overlapping	0	7.02115	6.91747	7.11574	6.39699	6.38652	5.98572	6.67504	7.36726	6.82097	7.05841	8.07835	6.58791	7.73123	7.38364	7.40794	7.22133	8.00611	7.2182	7.1182	7.37905
Pknox1	17	31564749	31607680	+	0.000954663	Pknox1	ENSMUSG00000006705	Pbx/knotted 1 homeobox [Source:MGI Symbol;Acc:MGI:1201409]	gene	overlapping	0	8.2059	6.88655	7.15713	7.33436	7.51101	7.9256	7.75389	6.72729	8.09797	7.65817	8.59247	8.37466	8.21324	8.08783	7.84241	8.26926	8.58583	8.04544	8.02935	8.24554
Stag1	9	100597798	100958545	+	0.0287976	Stag1	ENSMUSG00000037286	stromal antigen 1 [Source:MGI Symbol;Acc:MGI:1098658]	gene	overlapping	0	6.56071	5.62927	5.22098	5.68303	6.05494	5.67915	6.46921	7.05431	5.9001	5.93747	5.45879	5.94997	6.43218	6.89129	6.38748	7.43076	7.7009	6.10117	6.26348	7.35437
Pwwp2a	11	43681998	43721491	+	8.37984e-05	Pwwp2a	ENSMUSG00000044950	PWWP domain containing 2A [Source:MGI Symbol;Acc:MGI:1918052]	gene	overlapping	0	6.06343	6.06287	6.38603	6.41999	6.36372	5.95949	5.36923	5.73745	6.34918	6.16447	7.04142	6.57883	6.83756	7.07033	5.89046	6.65553	6.80797	7.02108	6.77367	6.64381
Iscu	5	113772748	113778288	+	0.00742847	Iscu	ENSMUSG00000025825	IscU iron-sulfur cluster scaffold homolog (E. coli) [Source:MGI Symbol;Acc:MGI:1913633]	gene	overlapping	0	5.0265	6.37198	5.8967	5.18888	5.0691	4.67109	4.89974	5.75756	5.3472	5.60009	6.88603	6.31306	6.67241	6.07801	6.60515	5.57836	5.5829	5.67436	4.69115	5.8125
Prkar2a	9	108692143	108749512	+	0.0265402	Prkar2a	ENSMUSG00000032601	protein kinase, cAMP dependent regulatory, type II alpha [Source:MGI Symbol;Acc:MGI:108025]	gene	overlapping	0	4.19761	4.22759	5.06271	6.40195	5.88609	5.27079	5.89974	6.36071	5.47965	5.56283	6.12984	5.65131	6.63417	6.03355	6.26718	6.01308	6.19263	6.89627	5.92845	6.3308
Porcn	X	8193848	8206525	-	0.0130953	Porcn	ENSMUSG00000031169	porcupine homolog (Drosophila) [Source:MGI Symbol;Acc:MGI:1890212]	gene	overlapping	0	4.5644	5.49062	6.10732	5.70994	4.97599	6.57177	5.0406	6.16383	6.17256	6.04646	7.19646	6.25158	6.6003	6.41778	6.44406	6.20602	6.59689	6.6016	5.75273	5.90396
Dazap1	10	80261486	80288408	+	0.00258126	Dazap1	ENSMUSG00000069565	DAZ associated protein 1 [Source:MGI Symbol;Acc:MGI:1917498]	gene	overlapping	0	4.07897	5.04144	5.29404	4.68574	4.37288	4.76874	5.05728	4.79208	5.42437	5.15893	6.03439	5.76235	6.00084	5.81716	5.89916	4.58153	5.2934	4.75645	5.55951	5.12871
Satb1	17	51736187	51833290	-	0.00133509	Satb1	ENSMUSG00000023927	special AT-rich sequence binding protein 1 [Source:MGI Symbol;Acc:MGI:105084]	gene	overlapping	0	7.35908	7.19689	8.28884	7.01955	6.86027	7.06013	7.57868	7.83766	7.66038	7.41734	8.62248	7.38076	7.30959	7.59575	7.60604	8.53777	8.93588	7.80045	7.85594	8.56844
Itgb1bp1	12	21269806	21286237	-	0.00133509	null				Not found	0	5.25347	5.53425	6.01308	5.64169	5.28342	5.99544	5.68043	5.53683	5.1837	5.46299	5.84375	6.57731	5.74435	6.1485	6.39365	6.41042	7.11863	5.85215	5.23356	6.08211
Ythdc1	5	86804221	86836659	+	0.000291271	Ythdc1	ENSMUSG00000035851	YTH domain containing 1 [Source:MGI Symbol;Acc:MGI:2443713]	gene	overlapping	0	6.50811	6.96607	6.45669	6.3117	6.70935	6.14405	6.90666	7.25329	7.18148	6.98987	7.38332	6.89985	6.718	7.16817	7.17944	7.92606	8.18494	7.33073	6.99875	7.76677
Mff	1	82724890	82752394	+	0.0379931	Mff	ENSMUSG00000026150	mitochondrial fission factor [Source:MGI Symbol;Acc:MGI:1922984]	gene	overlapping	0	4.6079	5.54648	6.70462	5.6556	5.28827	5.89867	4.96307	6.35412	6.05372	6.36057	7.35725	6.5404	7.16833	6.50829	6.22398	5.22842	6.64254	6.74684	5.19563	6.04521
Naa50	16	44139830	44163366	+	0.000781404	Naa50	ENSMUSG00000022698	N(alpha)-acetyltransferase 50, NatE catalytic subunit [Source:MGI Symbol;Acc:MGI:1919367]	gene	overlapping	0	6.88633	8.58921	7.93051	7.80912	7.71296	7.46685	7.92836	8.0183	7.52328	6.93098	8.69859	8.06382	7.73862	8.22266	7.76202	8.14042	8.48729	9.20715	8.26489	8.71014
Dnmt3a	12	3806007	3914443	+	0.0458379	Dnmt3a	ENSMUSG00000020661	DNA methyltransferase 3A [Source:MGI Symbol;Acc:MGI:1261827]	gene	overlapping	0	6.5384	5.97514	5.43532	6.0734	5.65407	6.56743	6.16893	5.22649	6.50829	5.80899	6.93971	6.23628	6.65688	6.32674	6.5909	7.22943	5.19263	5.92211	6.67534	7.72771
Map3k5	10	19934472	20142753	+	0.0420151	Map3k5	ENSMUSG00000071369	mitogen-activated protein kinase kinase kinase 5 [Source:MGI Symbol;Acc:MGI:1346876]	gene	overlapping	0	4.39263	4.88655	3.89279	4.52528	5.01162	4.24659	3.91812	5.38353	5.00933	4.72902	5.56019	5.15721	5.35305	6.00159	5.57289	4.53654	4.83181	6.18893	4.27051	4.03771
Mrpl14	17	45686322	45698495	+	0.00111797	Mrpl14	ENSMUSG00000023939	mitochondrial ribosomal protein L14 [Source:MGI Symbol;Acc:MGI:1333864]	gene	overlapping	0	4.59354	4.8574	4.85304	5.08579	3.96392	5.09218	4.89974	5.07448	5.16584	5.28631	5.98661	6.02092	5.64993	5.62975	5.61575	5.556	5.80396	4.62975	4.95838	5.15319
Zdhhc4	5	143316489	143329256	-	0.00837333	Zdhhc4	ENSMUSG00000001844	zinc finger, DHHC domain containing 4 [Source:MGI Symbol;Acc:MGI:1920131]	gene	overlapping	0	5.75059	5.16553	5.40815	5.08989	4.90831	5.01786	4.97189	5.52514	4.2488	5.07908	5.35725	6.11807	5.19962	5.62076	5.70114	5.92107	6.65597	6.07326	4.20153	5.91627
Imp3	9	56937500	56938397	+	0.00471627	Imp3	ENSMUSG00000032288	IMP3, U3 small nucleolar ribonucleoprotein, homolog (yeast) [Source:MGI Symbol;Acc:MGI:1916119]	gene	overlapping	0	6.00497	6.69115	6.64302	5.82768	5.5848	5.0524	5.33544	6.64062	5.77898	6.03743	7.4394	6.83528	7.14008	6.74592	7.01975	5.9434	6.87454	6.33073	5.52463	5.89776
Cox18	5	90214724	90224001	-	0.00894529	Cox18	ENSMUSG00000035505	COX18 cytochrome c oxidase assembly homolog (S. cerevisiae) [Source:MGI Symbol;Acc:MGI:2448532]	gene	overlapping	0	5.97206	6.06712	6.47251	5.46018	4.3545	5.66704	5.23639	5.8258	5.81668	5.72153	6.63027	6.66852	6.57667	6.74592	6.52872	5.59726	6.83378	5.99696	4.84232	6.32927
Sike1	3	102995728	103003914	+	0.00274808	Sike1	ENSMUSG00000027854	suppressor of IKBKE 1 [Source:MGI Symbol;Acc:MGI:1913891]	gene	overlapping	0	4.70458	6.17737	5.36923	5.45383	5.17239	5.86726	5.90436	6.43125	6.07781	5.66795	7.25207	6.28172	6.67583	6.41605	6.57289	5.8493	5.61532	6.52311	5.86294	6.11275
Ubxn2a	12	4879032	4907705	-	0.000169909	Ubxn2a	ENSMUSG00000020634	UBX domain protein 2A [Source:MGI Symbol;Acc:MGI:2442310]	gene	overlapping	0	6.88042	8.11716	6.44604	7.53735	7.70028	6.96362	7.77547	7.79573	7.4328	7.0673	8.6357	7.92989	8.14812	8.17484	7.79269	7.99241	8.35641	8.09614	7.25783	8.02355
Gm11457	2	164754242	164769666	-	0.0264276	Gm11457	ENSMUSG00000086453	predicted gene 11457 [Source:MGI Symbol;Acc:MGI:3705139]	gene	overlapping	0	3.62211	3.92452	4.15059	3.24517	2.31703	3.72269	3.42169	4.15249	3.78192	3.96946	5.19856	4.80965	4.41588	4.32858	4.99696	3.43514	3.70843	3.95863	3.65721	3.6025
Tmem60	5	20882191	20886870	+	0.0380954	Tmem60	ENSMUSG00000045435	transmembrane protein 60 [Source:MGI Symbol;Acc:MGI:2673965]	gene	overlapping	0	4.6079	5.81255	4.81217	5.34813	4.77646	5.04306	4.55685	3.95767	4.22311	4.69115	6.36848	5.57427	6.34876	5.10189	5.74684	4.378	5.21093	4.94189	5.03307	4.98803
Rnaset2b	17	6978860	7011299	+	0.0235307	Rnaset2b	ENSMUSG00000094724	ribonuclease T2B [Source:MGI Symbol;Acc:MGI:3702087]	gene	overlapping	0	5.72447	5.64642	5.50878	5.10213	5.24403	5.18566	4.7018	6.02971	5.87832	6.43119	5.43763	6.42024	6.30517	6.78534	6.40591	6.43689	7.00086	5.01842	5.27612	6.16356
Myo9a	9	59750896	59928866	+	0.00129915	Myo9a	ENSMUSG00000039585	myosin IXa [Source:MGI Symbol;Acc:MGI:107735]	gene	overlapping	0	7.10703	7.93618	6.60524	7.53359	6.98647	7.2316	7.29909	6.89097	7.4642	7.17411	8.28898	7.60737	6.98573	7.66224	7.34884	8.31184	7.66816	8.18241	7.75474	8.42106
Baz2b	2	59899363	60209839	-	0.00643766	Baz2b	ENSMUSG00000026987	bromodomain adjacent to zinc finger domain, 2B [Source:MGI Symbol;Acc:MGI:2442782]	gene	overlapping	0	5.75704	5.8769	4.45669	5.72322	5.36831	4.61337	5.75389	5.07448	5.53637	5.05543	5.65493	6.35087	6.29629	6.25109	5.58373	6.16227	5.82391	5.09614	5.81564	6.55604
Mrps24	11	5703983	5715680	-	0.00292071	Mrps24	ENSMUSG00000020477	mitochondrial ribosomal protein S24 [Source:MGI Symbol;Acc:MGI:1928142]	gene	overlapping	0	5.53465	7.0479	6.56152	6.012	5.15656	5.61967	5.43452	6.53391	6.30088	6.43119	7.50531	6.81352	7.02388	6.75827	7.14937	6.45081	6.98145	6.31348	5.91773	6.40112
Pigh	12	79080673	79089670	-	0.0188645	Pigh	ENSMUSG00000021120	phosphatidylinositol glycan anchor biosynthesis, class H [Source:MGI Symbol;Acc:MGI:99463]	gene	overlapping	0	4.80767	5.54037	5.71352	6.34126	4.83065	5.7875	5.46609	5.35742	5.29062	5.79478	5.62404	6.14086	6.93515	6.45028	6.24915	6.26434	6.31329	6.25594	5.87407	4.74277
Spc24	9	21755442	21760286	-	0.0259821	Spc24	ENSMUSG00000074476	SPC24, NDC80 kinetochore complex component, homolog (S. cerevisiae) [Source:MGI Symbol;Acc:MGI:1914879]	gene	overlapping	0	5.48885	5.68564	5.36923	6.04197	3.92708	5.04618	5.1379	4.82103	5.35904	5.67184	6.23582	6.74758	5.6638	6.10404	5.75005	5.64042	6.61074	4.97519	5.34437	5.62518
Jarid2	13	44729474	44921643	+	0.00215587	Jarid2	ENSMUSG00000038518	jumonji, AT rich interactive domain 2 [Source:MGI Symbol;Acc:MGI:104813]	gene	overlapping	0	7.58268	7.67036	8.35293	8.13379	7.76172	7.42493	7.6858	7.73871	7.73574	7.87043	8.74383	7.67137	8.37641	8.06481	7.95586	8.9669	9.42693	7.27389	8.13101	8.4706
Snx10	6	51523901	51590679	+	0.0154946	Snx10	ENSMUSG00000038301	sorting nexin 10 [Source:MGI Symbol;Acc:MGI:1919232]	gene	overlapping	0	6.59715	4.79728	5.47251	5.88785	5.89247	6.19412	6.0364	5.38999	6.00682	6.62038	7.28404	5.82764	6.31619	6.62527	6.40794	6.33735	6.69115	7.14937	6.22199	6.47512
1810008A18Rik	10	77486656	77515813	-	0.00207473	1810008A18Rik	ENSMUSG00000032977	RIKEN cDNA 1810008A18 gene [Source:MGI Symbol;Acc:MGI:1916334]	gene	overlapping	0	5.18809	5.88655	5.71795	6.06925	5.45281	6.02578	6.29382	5.90906	5.97896	6.00693	6.64881	6.77432	6.86484	6.20973	7.35728	6.11933	6.10728	6.21936	5.53168	6.27612
Trmt61a	12	111678105	111683902	+	0.00963754	Trmt61a	ENSMUSG00000060950	tRNA methyltransferase 61 homolog A (S. cerevisiae) [Source:MGI Symbol;Acc:MGI:2443487]	gene	overlapping	0	5.69788	5.79216	6.18941	5.97475	6.18285	6.61232	5.87173	6.97495	6.39207	6.42658	7.26414	6.47669	7.31619	6.86362	7.70776	6.43514	7.23498	6.08347	5.76274	6.39086
Wdr6	9	108572313	108578670	-	0.0104551	Wdr6	ENSMUSG00000066357	WD repeat domain 6 [Source:MGI Symbol;Acc:MGI:1930140]	gene	overlapping	0	5.19761	5.04144	5.19578	4.24517	5.71296	4.67915	4.47232	5.29688	4.59429	5.43577	5.99629	4.8852	5.35732	5.52445	5.50612	5.8361	6.78982	5.12609	5.40444	5.15319
Ranbp17	11	33211795	33513746	-	0.00323659	Ranbp17	ENSMUSG00000040594	RAN binding protein 17 [Source:MGI Symbol;Acc:MGI:1929706]	gene	overlapping	0	6.03715	5.29436	6.27009	5.57883	5.44848	5.39343	5.79425	5.29688	5.9001	5.71777	6.63338	5.25158	6.01444	6.47043	6.17228	5.619	7.12347	5.81585	6.50449	6.59868
Tmem43	6	91473703	91488459	+	0.047653	Tmem43	ENSMUSG00000030095	transmembrane protein 43 [Source:MGI Symbol;Acc:MGI:1921372]	gene	overlapping	0	3.73105	3.90566	3.92382	3.46335	4.42665	3.01149	3.2582	4.19734	3.94793	4.34602	4.26414	5.13674	4.40766	4.86869	3.90205	2.81473	4.78372	3.75645	4.35235	5.18407
Dynlrb1	2	155236533	155250277	+	0.0334977	Dynlrb1	ENSMUSG00000047459	dynein light chain roadblock-type 1 [Source:MGI Symbol;Acc:MGI:1914318]	gene	overlapping	0	5.11961	6.4683	5.00585	5.62198	4.50373	4.24116	5.61996	4.97495	5.39783	5.62441	6.53716	6.18936	6.66725	6.13173	5.55465	5.58469	6.41678	4.61575	5.45471	5.63762
Arf3	15	98737621	98763214	-	0.00494438	Arf3	ENSMUSG00000051853	ADP-ribosylation factor 3 [Source:MGI Symbol;Acc:MGI:99432]	gene	overlapping	0	6.54588	5.9385	6.1473	6.39367	7.43979	6.86196	7.19742	6.07448	6.46146	5.82307	7.11881	7.27143	6.98158	6.94149	7.64965	6.98226	7.52313	7.26157	6.77268	7.11542
Rbpms	8	33782644	33929841	-	7.46145e-05	Rbpms	ENSMUSG00000031586	RNA binding protein gene with multiple splicing [Source:MGI Symbol;Acc:MGI:1334446]	gene	overlapping	0	7.31163	7.9021	7.81941	7.32656	7.2515	6.81519	6.37256	7.44527	7.66357	7.51269	8.61778	7.65923	8.29295	8.12803	8.06813	8.10784	7.39959	7.86108	7.60084	7.91167
Mgrn1	16	4886100	4938296	+	0.0211839	Mgrn1	ENSMUSG00000022517	mahogunin, ring finger 1 [Source:MGI Symbol;Acc:MGI:2447670]	gene	overlapping	0	5.91547	5.26506	5.36923	6.70594	5.16714	6.60388	6.23639	5.84472	6.30701	6.62441	7.01784	6.24204	6.88718	6.60566	6.3957	7.06831	7.20029	6.44009	6.53752	6.2601
Tmem93	11	73175519	73177037	-	0.0145647	Tmem93	ENSMUSG00000047260	transmembrane protein 93 [Source:MGI Symbol;Acc:MGI:1913298]	gene	overlapping	0	6.63969	7.42757	6.75939	5.5671	6.39103	6.29722	6.63115	6.33752	6.18592	6.51161	7.93845	7.38337	7.62267	7.53724	7.67013	6.48335	6.79387	6.06555	6.18524	6.22589
Dhx57	17	80238304	80290476	-	0.00495915	Dhx57	ENSMUSG00000035051	DEAH (Asp-Glu-Ala-Asp/His) box polypeptide 57 [Source:MGI Symbol;Acc:MGI:2147067]	gene	overlapping	0	5.51193	5.14958	5.45669	4.95689	5.77301	4.97594	5.79425	5.51927	6.19255	4.60417	6.66711	6.08641	5.77981	6.27612	5.10117	6.25643	5.74657	5.95029	5.69743	6.43574
Gm20418	7	127001480	127016484	-	0.0489769	Gm20418	ENSMUSG00000092534	predicted gene 20418 [Source:MGI Symbol;Acc:MGI:5141883]	gene	overlapping	0	2.99408	3.46509	3.96914	4.1303	3.65407	4.19131	3.88113	4.18254	4.19696	4.85766	4.3722	5.37902	4.28736	4.28373	4.87291	4.42107	5.49104	4.08601	3.79627	4.23411
Fkbp8	8	70527724	70535328	+	0.00164021	Fkbp8	ENSMUSG00000019428	FK506 binding protein 8 [Source:MGI Symbol;Acc:MGI:1341070]	gene	overlapping	0	7.3269	6.15359	6.63835	6.94787	6.34755	6.44161	7.05935	6.54553	6.85343	6.66209	8.03673	7.09704	7.05052	6.92819	7.36043	7.48673	8.04743	6.80509	6.42728	7.22918
Rhebl1	15	98877778	98881404	-	0.00685457	Rhebl1	ENSMUSG00000023755	Ras homolog enriched in brain like 1 [Source:MGI Symbol;Acc:MGI:1916409]	gene	overlapping	0	5.75059	6.35817	5.17013	5.86886	6.27612	5.86196	5.2582	5.4835	5.25726	6.00075	5.95717	6.43372	6.6003	6.49523	6.41605	6.49179	7.11215	6.34778	5.31201	5.91627
Znrf2	6	54816916	54893500	+	0.00164569	Znrf2	ENSMUSG00000058446	zinc and ring finger 2 [Source:MGI Symbol;Acc:MGI:1196246]	gene	overlapping	0	7.21413	8.02296	7.84597	7.0734	7.33823	7.02972	6.45983	7.77492	7.35511	8.07099	8.37962	7.81094	7.89896	8.13331	7.84691	8.28197	8.17875	8.55006	6.78845	8.34795
Acbd6	1	155558120	155687233	+	0.0248099	Acbd6	ENSMUSG00000033701	acyl-Coenzyme A binding domain containing 6 [Source:MGI Symbol;Acc:MGI:1919732]	gene	overlapping	0	5.30724	6.41595	6.44604	5.88549	4.73444	4.90555	4.30084	6.48952	5.86454	6.38686	6.60201	6.33837	7.06628	6.5625	6.54175	6.21828	6.86878	5.88755	5.79822	6.02261
Ralgps2	1	156804166	156939626	-	0.00330146	Ralgps2	ENSMUSG00000026594	Ral GEF with PH domain and SH3 binding motif 2 [Source:MGI Symbol;Acc:MGI:1925505]	gene	overlapping	0	5.54214	6.73455	6.90644	6.92852	6.58874	6.85041	6.88113	6.08248	6.86869	6.52674	7.25005	7.12016	6.58398	7.80465	7.01842	6.95321	7.88502	7.18893	6.68906	7.2601
Mycbp2	14	103113411	103346814	-	0.00326655	Mycbp2	ENSMUSG00000033004	MYC binding protein 2 [Source:MGI Symbol;Acc:MGI:2179432]	gene	overlapping	0	6.93268	7.29798	6.39713	5.87363	6.1135	6.42373	5.95419	6.68854	6.82809	6.16723	6.9144	6.68834	6.33148	7.17944	6.89627	7.25643	7.91789	6.79735	7.09778	7.49919
Syce2	8	84872111	84888221	+	0.00218503	Syce2	ENSMUSG00000003824	synaptonemal complex central element protein 2 [Source:MGI Symbol;Acc:MGI:1919096]	gene	overlapping	0	5.17851	6.74254	6.38325	6.29579	6.24403	6.02262	5.81401	6.3475	6.00431	6.09657	7.13424	6.96862	7.02522	6.8483	7.11369	6.44734	7.03036	5.58732	5.80985	6.65242
Mrps26	2	130563742	130568695	+	0.0197343	Mrps26	ENSMUSG00000037740	mitochondrial ribosomal protein S26 [Source:MGI Symbol;Acc:MGI:1333830]	gene	overlapping	0	4.73105	7.17343	6.75509	5.59624	5.34057	5.50646	5.69649	6.79208	5.77014	6.23985	7.06	7.01869	6.70631	6.84444	7.2861	6.23849	7.1299	6.16268	5.90332	6.14449
Ube2j1	4	33031416	33052363	+	0.00799783	Ube2j1	ENSMUSG00000028277	ubiquitin-conjugating enzyme E2, J1 [Source:MGI Symbol;Acc:MGI:1926245]	gene	overlapping	0	5.19761	6.75049	5.42451	5.48844	5.69481	6.12647	5.73328	5.89551	6.22527	6.27356	7.02732	5.95232	6.16346	6.69115	6.56926	6.58784	6.11702	6.87143	5.58907	7.04801
Cenpo	12	4196004	4234294	-	0.0292758	Cenpo	ENSMUSG00000020652	centromere protein O [Source:MGI Symbol;Acc:MGI:1923800]	gene	overlapping	0	3.342	4.8176	5.06271	4.39864	5.45281	5.3737	5.55098	5.37705	4.51183	5.03138	5.63648	5.46689	5.71467	6.44858	5.50612	5.60973	4.53528	5.37089	5.66363	5.24717
Zbtb34	2	33406108	33431324	-	0.00147732	Zbtb34	ENSMUSG00000068966	zinc finger and BTB domain containing 34 [Source:MGI Symbol;Acc:MGI:2685195]	gene	overlapping	0	6.40501	6.54952	6.77437	6.76873	6.42225	6.01308	5.73328	6.12566	6.47422	6.07026	7.1753	6.72445	7.26251	6.35412	6.49277	7.28586	7.0096	7.56562	6.03307	6.8706
Wipf2	11	98863638	98905040	+	0.0498071	Wipf2	ENSMUSG00000038013	WAS/WASL interacting protein family, member 2 [Source:MGI Symbol;Acc:MGI:1924462]	gene	overlapping	0	3.92697	5.93386	6.03811	5.65005	5.91145	6.45223	6.01522	5.33752	6.12018	5.90806	6.387	6.71344	7.29407	6.53246	5.40794	5.80934	6.60383	6.27166	5.89242	6.42142
Pppde2	15	81992523	82033862	-	0.0453078	Pppde2	ENSMUSG00000022472	PPPDE peptidase domain containing 2 [Source:MGI Symbol;Acc:MGI:106313]	gene	overlapping	0	5.75704	5.85249	5.64535	5.28509	5.61985	4.79122	5.06555	4.79208	5.01433	4.98831	6.13424	6.48966	6.27386	5.83282	4.67773	6.4246	6.30196	5.90781	5.22779	4.05266
Pcm1	8	41239759	41334086	+	0.0322137	Pcm1	ENSMUSG00000031592	pericentriolar material 1 [Source:MGI Symbol;Acc:MGI:1277958]	gene	overlapping	0	6.39263	7.74652	5.94666	6.9388	5.88609	6.49851	6.74362	7.01517	6.43373	6.00075	8.33358	6.95582	6.12135	7.18555	6.39159	7.11168	7.07434	7.69282	6.85173	7.43503
Fblim1	4	141576062	141606096	-	0.0304994	Fblim1	ENSMUSG00000006219	filamin binding LIM protein 1 [Source:MGI Symbol;Acc:MGI:1921452]	gene	overlapping	0	6.47325	7.06074	4.55905	6.90425	5.7591	6.28407	6.66146	6.98351	6.44858	6.40803	7.14733	5.98015	6.74761	6.86235	6.88901	7.6675	7.59573	7.04087	6.86108	7.1029
Mll3	5	25271798	25498783	-	9.82442e-05	Mll3	ENSMUSG00000038056	myeloid/lymphoid or mixed-lineage leukemia 3 [Source:MGI Symbol;Acc:MGI:2444959]	gene	overlapping	0	7.20472	7.98416	8.55038	8.34299	8.21948	7.88958	8.22905	8.35247	7.91889	7.70452	9.11881	7.89681	8.30683	8.40475	8.38335	9.00131	8.87022	8.32051	8.74315	8.9741
Urm1	2	29820075	29845002	+	0.00460929	Urm1	ENSMUSG00000069020	ubiquitin related modifier 1 homolog (S. cerevisiae) [Source:MGI Symbol;Acc:MGI:1915455]	gene	overlapping	0	6.11459	5.14958	5.76583	5.83991	6.0291	6.0982	6.09816	6.72218	6.51006	6.37019	6.93216	7.18836	6.50527	6.73624	7.00101	6.86628	6.88976	6.10117	5.85173	6.16528
Fam76a	4	132899213	132922558	-	0.00165004	Fam76a	ENSMUSG00000028878	family with sequence similarity 76, member A [Source:MGI Symbol;Acc:MGI:2385211]	gene	overlapping	0	7.01847	6.78959	7.17336	6.99897	7.11486	7.18425	7.29558	7.82937	7.52328	7.54277	8.40165	6.75699	8.08379	7.37119	7.90205	7.75917	8.38758	7.98271	6.91415	7.83969
4833439L19Rik	13	54551218	54565435	-	0.0232926	4833439L19Rik	ENSMUSG00000025871	RIKEN cDNA 4833439L19 gene [Source:MGI Symbol;Acc:MGI:1921162]	gene	overlapping	0	5.52712	6.10067	5.85707	6.86528	6.89247	7.16357	6.60018	6.54841	6.55365	7.02226	6.62404	7.26767	7.25336	6.38453	7.30804	7.55035	7.31329	6.7209	7.13525	7.46886
Rcor1	12	111039351	111115901	+	0.00914139	Rcor1	ENSMUSG00000037896	REST corepressor 1 [Source:MGI Symbol;Acc:MGI:106340]	gene	overlapping	0	6.25803	8.065	8.26556	7.60272	7.75823	7.39159	7.53618	6.28999	6.51713	7.28885	8.11881	7.47913	8.29741	8.05817	8.07582	8.05299	8.07933	8.11493	7.6053	7.89932
Uchl4	9	64235201	64236362	+	0.0109326	Uchl4	ENSMUSG00000035337	ubiquitin carboxyl-terminal esterase L4 [Source:MGI Symbol;Acc:MGI:1890440]	gene	overlapping	0	2.40912	4.58847	3.79549	3.99678	3.27856	2.91923	3.61434	3.38998	3.51183	3.66013	4.18168	4.41345	4.13635	4.32858	4.27612	3.6675	4.55452	4.00236	3.78845	4.11809
Morc3	16	93832121	93876072	+	0.000105533	Morc3	ENSMUSG00000039456	microrchidia 3 [Source:MGI Symbol;Acc:MGI:2136841]	gene	overlapping	0	6.74735	6.64642	7.75939	7.20031	7.55191	7.07395	7.60728	7.44991	7.65399	7.09222	8.57884	7.77366	7.39107	7.55701	7.85736	7.84601	8.08016	7.73878	7.38253	8.04754
Cyb5r4	9	87022014	87077774	+	0.00108103	Cyb5r4	ENSMUSG00000032872	cytochrome b5 reductase 4 [Source:MGI Symbol;Acc:MGI:2386848]	gene	overlapping	0	6.03715	7.93502	6.92956	7.22011	6.41118	6.83336	7.48007	7.30544	7.42061	7.19185	7.76523	7.63536	7.43623	7.54042	7.67605	8.09737	7.78168	7.83864	7.203	7.91269
Pde12	14	26659958	26669883	-	0.00168264	Pde12	ENSMUSG00000043702	phosphodiesterase 12 [Source:MGI Symbol;Acc:MGI:2443226]	gene	overlapping	0	5.94969	7.14958	6.89866	6.20411	5.74153	6.34613	5.41524	6.55704	5.56733	6.08201	6.81121	6.57275	6.5489	7.04255	6.49851	6.88178	7.2215	7.02373	6.57777	6.97729
Mrps15	4	126046925	126055532	+	0.0153737	Mrps15	ENSMUSG00000028861	mitochondrial ribosomal protein S15 [Source:MGI Symbol;Acc:MGI:1913657]	gene	overlapping	0	6.17369	5.95235	5.37485	4.72322	5.43979	5.18283	5.21425	5.64333	6.04398	5.94392	6.29193	6.24586	5.95645	6.27612	6.46179	6.63281	6.70198	4.78176	5.62464	5.92646
Mrps14	1	160195215	160202170	+	0.000570849	Mrps14	ENSMUSG00000058267	mitochondrial ribosomal protein S14 [Source:MGI Symbol;Acc:MGI:1928141]	gene	overlapping	0	5.75059	6.65773	6.09033	6.05462	5.20865	5.67915	6.34905	5.90906	6.17032	6.04646	7.27214	6.67279	6.82989	6.62975	6.62801	5.8201	6.67586	6.62627	5.91415	6.15492
Zfr	15	12117831	12185683	+	0.0450723	Zfr	ENSMUSG00000022201	zinc finger RNA binding protein [Source:MGI Symbol;Acc:MGI:1341890]	gene	overlapping	0	6.23971	7.16553	6.92382	7.03879	6.1135	6.11166	7.08194	7.11985	7.28442	6.74943	8.09984	7.29101	5.32277	6.94269	6.5137	7.83809	7.90108	7.12114	7.33367	7.74565
Galnt1	18	24205344	24286818	+	0.00612626	Galnt1	ENSMUSG00000000420escription=UDP-N-acetyl-alpha-D-galactosamine:polypeptideN-acetylgalactosaminyltransferase 1 [Source:MGISymbol;Acc:MGI:894693]	No description	gene	overlapping	0	5.75059	6.33369	4.75293	5.62764	5.87967	5.65074	6.25096	6.04206	5.63382	5.9212	6.2399	6.75833	6.7925	6.28752	6.06555	5.22437	6.36051	6.48316	6.25499	6.71249
Fam96a	9	66126611	66138955	+	9.18044e-05	Fam96a	ENSMUSG00000032381	family with sequence similarity 96, member A [Source:MGI Symbol;Acc:MGI:1915500]	gene	overlapping	0	6.98311	6.93386	7.14072	7.10315	6.26386	6.75926	7.11419	6.67009	7.00054	7.31647	8.26515	7.43204	7.56931	7.3514	6.81278	7.378	7.8387	7.31889	7.07787	7.3285
Pak4	7	28558819	28598185	-	0.0134724	Pak4	ENSMUSG00000030602	p21 protein (Cdc42/Rac)-activated kinase 4 [Source:MGI Symbol;Acc:MGI:1917834]	gene	overlapping	0	5.99408	5.61773	6.26404	6.78401	5.91145	6.51774	6.412	6.09833	6.55021	6.26585	7.22967	6.4718	6.41383	5.71387	6.80355	7.46974	7.32034	6.76599	6.407	6.71014
Acads	5	115110299	115119346	-	0.0239651	Acads	ENSMUSG00000029545	acyl-Coenzyme A dehydrogenase, short chain [Source:MGI Symbol;Acc:MGI:87868]	gene	overlapping	0	6.78574	5.30159	6.30292	6.40689	6.21376	6.66603	6.87643	6.28307	6.77751	6.58984	6.77511	7.28358	7.1376	7.30165	7.53152	7.27612	7.33153	6.23318	5.97914	6.4084
Tdp2	13	24831679	24842153	+	0.0274653	Tdp2	ENSMUSG00000035958	tyrosyl-DNA phosphodiesterase 2 [Source:MGI Symbol;Acc:MGI:1860486]	gene	overlapping	0	6.50043	7.98865	7.6325	6.64587	6.42004	6.42852	6.60302	6.87034	5.88925	6.55652	7.91312	7.50491	5.88718	7.73416	7.33287	7.08515	7.39026	8.05196	6.81178	7.3783
Pxk	14	8098213	8165111	+	0.00248774	Pxk	ENSMUSG00000033885	PX domain containing serine/threonine kinase [Source:MGI Symbol;Acc:MGI:1289230]	gene	overlapping	0	6.18331	6.74519	6.14401	7.02278	6.2614	6.15276	6.73846	6.48048	6.44858	6.64039	7.60043	6.99955	6.41588	6.7265	6.81432	7.41753	7.53165	6.43012	6.32828	7.35588
Gps2	11	69913888	69916591	+	0.0349334	Gps2	ENSMUSG00000023170	G protein pathway suppressor 2 [Source:MGI Symbol;Acc:MGI:1891751]	gene	overlapping	0	5.45748	6.5766	6.80386	5.88549	4.97599	5.47208	4.72286	6.39961	6.51713	5.66013	6.95468	6.21105	5.94229	5.93304	6.93627	6.77239	7.0876	5.97244	6.36424	6.37905
Thumpd3	6	113046225	113068273	+	0.0341908	Thumpd3	ENSMUSG00000030264	THUMP domain containing 3 [Source:MGI Symbol;Acc:MGI:1277973]	gene	overlapping	0	6.08924	5.40592	5.82044	5.382	5.15656	6.3971	5.45983	4.92248	6.43932	6.32392	6.75243	5.85796	6.31839	6.39159	6.61046	5.97264	6.54253	5.90781	6.61472	6.24717
Fam168b	1	34813219	34843065	-	0.0355442	Fam168b	ENSMUSG00000037503	family with sequence similarity 168, member B [Source:MGI Symbol;Acc:MGI:2448487]	gene	overlapping	0	5.28954	7.07558	5.71352	6.71527	6.71296	6.34739	7.10218	6.68329	6.04886	6.55231	7.51544	7.16025	7.4849	7.12327	7.44999	6.19779	7.03379	6.54729	5.71404	7.18661
Syap1	X	162857057	162888447	-	0.00248774	Syap1	ENSMUSG00000031357	synapse associated protein 1 [Source:MGI Symbol;Acc:MGI:1914293]	gene	overlapping	0	7.60074	7.84385	8.52278	7.85988	7.19064	7.82476	7.715	7.09042	7.33726	7.01768	9.08404	7.73197	8.10873	7.90432	8.05001	7.98286	8.14346	8.58417	7.80211	7.88163
Cmtm6	9	114731203	114749343	+	0.042285	Cmtm6	ENSMUSG00000032434	CKLF-like MARVEL transmembrane domain containing 6 [Source:MGI Symbol;Acc:MGI:2447165]	gene	overlapping	0	5.86258	5.26506	6.92573	7.23037	6.15391	5.78377	6.42169	6.36071	6.99422	6.60009	7.19436	6.67279	6.73944	6.74316	6.1913	7.49767	7.10565	7.30477	6.47921	7.40112
Mapk1	16	16983382	17047453	+	2.45954e-05	Mapk1	ENSMUSG00000063358	mitogen-activated protein kinase 1 [Source:MGI Symbol;Acc:MGI:1346858]	gene	overlapping	0	7.60432	7.13549	6.90644	7.17252	7.1039	6.9047	7.15544	7.61743	7.27716	7.10954	8.34783	7.27612	7.64906	7.57574	7.27834	8.06662	8.0909	7.50232	7.19784	7.8456
Commd4	9	57155041	57158299	-	0.0355442	Commd4	ENSMUSG00000032299	COMM domain containing 4 [Source:MGI Symbol;Acc:MGI:1913449]	gene	overlapping	0	5.35057	5.82766	4.81217	5.43781	5.39553	4.84595	4.81401	5.40281	4.97896	5.15337	6.17317	6.39978	6.29852	6.14642	4.61575	5.47315	5.50594	5.74684	4.52228	5.35964
Spast	17	74338987	74391113	+	3.58991e-06	Spast	ENSMUSG00000024068	spastin [Source:MGI Symbol;Acc:MGI:1858896]	gene	overlapping	0	7.70624	7.57062	7.30881	7.14616	6.9548	6.8513	7.08805	7.48048	6.55879	7.27356	7.78771	7.44375	7.94584	7.90308	8.15604	7.65703	7.73923	7.77074	7.61914	7.18407
Mprip	11	59661305	59780860	+	0.0275086	Mprip	ENSMUSG00000005417	myosin phosphatase Rho interacting protein [Source:MGI Symbol;Acc:MGI:1349438]	gene	overlapping	0	5.8262	6.85985	6.50622	7.45383	6.71836	7.31543	6.99588	6.34085	7.37856	7.04045	7.26013	7.61331	7.51487	7.43839	7.06555	7.89138	7.92067	7.12362	6.72124	7.31616
Vps13d	4	144972623	145194995	-	0.00359446	null				Not found	0	6.03184	5.8176	7.08347	6.31871	6.18804	6.13968	6.42812	5.8018	5.92155	6.22403	6.3722	6.12847	7.26706	6.93788	6.84916	7.07507	7.20942	6.56198	6.19119	6.3938
Pitpna	11	75588097	75628804	+	9.46972e-07	Pitpna	ENSMUSG00000017781	phosphatidylinositol transfer protein, alpha [Source:MGI Symbol;Acc:MGI:99887]	gene	overlapping	0	7.54588	8.03927	7.64186	7.36517	7.38652	6.73434	7.36421	7.83766	7.53984	7.72153	8.56427	7.83401	8.14194	7.9987	8.07326	7.96296	8.34402	8.23547	7.29694	7.83159
Ubp1	9	113930934	113977199	+	0.0279762	Ubp1	ENSMUSG00000009741	upstream binding protein 1 [Source:MGI Symbol;Acc:MGI:104889]	gene	overlapping	0	5.33339	7.25578	6.28511	6.83503	7.23778	5.80418	6.21797	6.35742	6.01682	6.41269	6.84643	6.95699	7.32713	6.63274	7.30477	6.90977	7.24389	7.54175	6.04132	6.6063
Ppt2	17	34616662	34628510	-	0.0139286	Ppt2	ENSMUSG00000015474	palmitoyl-protein thioesterase 2 [Source:MGI Symbol;Acc:MGI:1860075]	gene	overlapping	0	5.76347	6.84261	6.33501	5.6556	6.22392	6.17288	6.61996	7.22107	6.96353	7.21204	7.27612	6.97324	7.28736	7.14537	7.52217	7.65853	7.15847	6.12362	6.62902	6.65487
U2af2	7	5062143	5079945	+	0.0042457	U2af2	ENSMUSG00000030435	U2 small nuclear ribonucleoprotein auxiliary factor (U2AF) 2 [Source:MGI Symbol;Acc:MGI:98886]	gene	overlapping	0	6.16401	6.31237	5.54415	5.94787	5.56096	5.28934	6.06555	6.14105	5.79069	5.95355	7.01547	6.48643	6.44026	6.51477	7.11369	6.47656	6.28766	5.66419	5.34171	5.89983
Pten	19	32757497	32826160	+	0.00155062	Pten	ENSMUSG00000013663	phosphatase and tensin homolog [Source:MGI Symbol;Acc:MGI:109583]	gene	overlapping	0	6.46932	8.33897	7.90061	7.37277	7.04208	7.16501	6.56562	7.73871	7.36688	7.64337	8.05769	8.09704	8.02589	7.93244	7.99087	7.82345	7.67696	8.21006	7.7325	8.06884
Plekhm3	1	64785983	64956824	-	0.00728886	Plekhm3	ENSMUSG00000051344	pleckstrin homology domain containing, family M, member 3 [Source:MGI Symbol;Acc:MGI:2443627]	gene	overlapping	0	6.12461	5.67454	7.23959	6.69924	6.77646	6.50872	6.2068	6.38353	6.74479	7.33869	7.4831	7.11703	7.29407	7.0515	7.00505	7.48589	7.05927	6.80045	6.56639	7.40913
Usp9x	X	13071498	13173328	+	0.0150406	Usp9x	ENSMUSG00000031010	ubiquitin specific peptidase 9, X chromosome [Source:MGI Symbol;Acc:MGI:894681]	gene	overlapping	0	5.88042	8.14557	7.42722	7.75393	7.24528	7.31801	7.3303	7.67934	7.56903	7.01768	8.55856	7.70373	7.65167	7.64683	7.27834	7.45859	7.69549	8.41048	8.22308	8.16657
Tmem37	1	120067377	120074074	-	0.00360091	Tmem37	ENSMUSG00000050777	transmembrane protein 37 [Source:MGI Symbol;Acc:MGI:2157899]	gene	overlapping	0	6.27612	6.23138	6.57624	5.68574	6.59658	6.35496	6.34226	6.52807	6.0018	6.9326	6.97931	7.26107	7.08315	7.08238	7.54821	6.04096	6.35229	6.93768	6.44106	6.56258
Zfp42	8	43295068	43307009	-	0.00471592	Zfp42	ENSMUSG00000051176	zinc finger protein 42 [Source:MGI Symbol;Acc:MGI:99187]	gene	overlapping	0	5.83843	6.75576	6.19259	6.52982	6.94562	6.75164	7.18988	6.43125	6.88516	6.39159	6.88082	7.03315	6.75249	7.58578	7.3709	7.22741	7.66926	6.84165	6.50449	7.12606
Gm13625	2	69871412	69872202	-	0.0477165	Gm13625	ENSMUSG00000089902	predicted gene 13625 [Source:MGI Symbol;Acc:MGI:3709621]	gene	overlapping	0	3.30724	4.69115	3.55905	3.98801	3.39103	4.41048	3.76409	4.38999	3.99928	3.36538	5.35725	4.22469	3.81443	4.12327	4.01308	4.39969	4.31611	4.69115	4.05279	4.91218
Khdc1c	1	21368331	21370845	+	0.0264276	Khdc1c	ENSMUSG00000041722	KH domain containing 1C [Source:MGI Symbol;Acc:MGI:3583007]	gene	overlapping	0	6.20235	7.38054	6.65925	7.20221	6.15921	6.41652	7.1823	6.45299	6.43186	6.06434	8.16461	6.87535	6.31839	6.96061	6.43012	6.67197	7.39159	7.6016	7.07466	7.36039
Stag2	X	42149317	42277185	+	0.0395813	Stag2	ENSMUSG00000025862	stromal antigen 2 [Source:MGI Symbol;Acc:MGI:1098583]	gene	overlapping	0	7.07897	7.41762	8.39367	7.82583	7.54888	7.51661	6.99155	8.54697	7.46329	8.09946	8.65264	7.04528	7.79722	7.9865	7.29382	7.93599	8.81795	8.98611	8.36719	8.60345
Zfp148	16	33380775	33503903	+	0.0236951	Zfp148	ENSMUSG00000022811	zinc finger protein 148 [Source:MGI Symbol;Acc:MGI:1332234]	gene	overlapping	0	5.6844	7.51104	7.2866	7.25981	7.23527	5.97431	6.39242	7.59246	6.95575	7.41734	8.0285	6.85295	7.61198	7.48206	6.73878	7.79645	7.64927	7.3499	7.34037	8.05266
Lsm1	8	25785591	25803975	+	0.000218633	Lsm1	ENSMUSG00000037296	LSM1 homolog, U6 small nuclear RNA associated (S. cerevisiae) [Source:MGI Symbol;Acc:MGI:1914457]	gene	overlapping	0	5.65705	6.34073	5.66843	6.15206	5.54888	5.66095	6.20305	5.7425	5.94531	6.28122	6.95964	6.46525	6.22557	6.84702	6.4381	6.20191	6.34402	6.18182	5.84797	6.55473
Dem1	4	120921196	120925017	-	0.0428173	Dem1	ENSMUSG00000028629	defects in morphology 1 homolog (S. cerevisiae) [Source:MGI Symbol;Acc:MGI:1920422]	gene	overlapping	0	6.04244	6.46186	5.35791	6.25251	5.55292	5.72853	6.22167	4.82103	5.35511	6.01308	6.12102	5.56205	5.81443	7.08565	6.19601	6.26039	6.46332	6.86553	6.5021	5.90396
Tmem70	1	16665207	16678275	+	0.00656778	Tmem70	ENSMUSG00000025940	transmembrane protein 70 [Source:MGI Symbol;Acc:MGI:1915068]	gene	overlapping	0	6.88927	8.06924	6.86907	6.16768	6.38652	6.47671	6.78926	7.64062	7.18259	7.2977	8.32784	7.62804	7.7378	7.60033	7.68614	7.44648	7.56878	7.0771	6.87037	7.35135
Rere	4	150281646	150621966	+	0.0206641	Rere	ENSMUSG00000039852	arginine glutamic acid dipeptide (RE) repeats [Source:MGI Symbol;Acc:MGI:2683486]	gene	overlapping	0	6.58268	5.38565	6.61715	6.09398	6.83894	6.09067	6.14572	5.7425	6.44674	6.80368	7.26615	6.07355	6.91355	7.00159	7.39467	6.82545	6.96357	6.00504	6.57095	6.67192
2410002O22Rik	13	104142149	104178469	-	3.94335e-05	2410002O22Rik	ENSMUSG00000021711	RIKEN cDNA 2410002O22 gene [Source:MGI Symbol;Acc:MGI:1914225]	gene	overlapping	0	7.07897	7.95005	6.97285	7.71792	7.10528	6.94034	7.56999	7.13722	7.41211	7.15059	8.33453	7.78751	7.85882	7.9865	7.67267	7.82077	7.66041	7.91426	7.37472	7.67434
Zfp141	7	42473386	42505726	-	0.0239286	Zfp141	ENSMUSG00000092416	zinc finger protein 141 [Source:MGI Symbol;Acc:MGI:3584269]	gene	overlapping	0	4.40912	5.90566	5.96168	5.2707	5.84389	4.90899	5.98066	5.30373	6.25092	6.09076	5.88603	6.00746	5.92799	6.34323	5.82805	6.47145	6.51333	6.66928	5.53869	6.18407
1110004F10Rik	7	116093301	116105210	+	0.00043217	1110004F10Rik	ENSMUSG00000030663	RIKEN cDNA 1110004F10 gene [Source:MGI Symbol;Acc:MGI:1929274]	gene	overlapping	0	5.8262	7.16156	6.75939	6.84356	6.77819	6.32445	7.17467	6.38676	6.72358	6.96946	7.65493	7.47751	7.08186	7.15474	7.27389	6.77101	7.5377	7.17348	6.6421	7.21762
Upf3a	8	13785615	13798538	+	0.00125982	Upf3a	ENSMUSG00000038398	UPF3 regulator of nonsense transcripts homolog A (yeast) [Source:MGI Symbol;Acc:MGI:1914281]	gene	overlapping	0	5.53465	6.92217	6.27311	5.86168	5.34987	5.70108	5.95419	5.7425	6.07781	6.05841	6.13424	6.51367	6.30517	6.38807	6.49851	6.70719	6.82787	6.62101	6.06741	6.71132
Rras2	7	114046785	114117781	-	0.0152245	Rras2	ENSMUSG00000055723	related RAS viral (r-ras) oncogene homolog 2 [Source:MGI Symbol;Acc:MGI:1914172]	gene	overlapping	0	6.28954	7.44237	7.32051	6.34642	7.11213	6.03366	6.42812	7.52661	7.38919	6.81076	8.15275	6.46032	7.20674	7.32674	7.58822	7.43602	8.06011	7.4559	6.65721	7.27373
Sucla2	14	73525319	73596142	+	0.0317737	Sucla2	ENSMUSG00000022110	succinate-Coenzyme A ligase, ADP-forming, beta subunit [Source:MGI Symbol;Acc:MGI:1306775]	gene	overlapping	0	7.63794	8.03168	6.10394	7.8209	6.26632	7.42792	7.84316	6.68066	6.96611	7.55758	8.09984	7.77299	7.6271	8.04143	7.68697	7.81136	7.94274	7.95029	7.5009	7.92798
Ndufab1	7	122085403	122101886	-	0.00807605	Ndufab1	ENSMUSG00000030869	NADH dehydrogenase (ubiquinone) 1, alpha/beta subcomplex, 1 [Source:MGI Symbol;Acc:MGI:1917566]	gene	overlapping	0	5.46539	6.54343	5.88493	5.35838	4.65407	5.31025	5.36253	5.25505	5.63707	5.38923	6.37592	6.35796	6.19962	6.15889	6.07326	6.24449	5.69115	5.89627	5.03638	5.97042
Gsk3b	16	38089001	38246084	+	0.0342423	Gsk3b	ENSMUSG00000022812	glycogen synthase kinase 3 beta [Source:MGI Symbol;Acc:MGI:1861437]	gene	overlapping	0	4.69115	7.1754	6.54415	6.54035	6.19839	5.9462	5.85751	6.76254	5.74329	6.64634	7.15383	6.87535	6.85429	6.65785	6.96555	6.28974	6.32174	7.23548	6.08347	7.25365
Akt1	12	112653821	112674884	-	0.0452867	Akt1	ENSMUSG00000001729	thymoma viral proto-oncogene 1 [Source:MGI Symbol;Acc:MGI:87986]	gene	overlapping	0	6.51954	5.91512	5.28809	6.52528	6.66343	5.65279	5.72286	6.68854	6.16808	6.16723	5.82214	6.32577	6.39316	6.34687	6.28278	6.97626	7.47473	6.95863	6.34571	7.05638
2005-03-01	19	37207543	37222139	+	0.0248847	2005-03-01	ENSMUSG00000023307	membrane-associated ring finger (C3HC4) 5 [Source:MGI Symbol;Acc:MGI:1915207]	gene	overlapping	0	6.51193	8.45863	7.85103	7.32743	6.57293	6.65585	6.76916	7.19918	7.13632	7.59395	8.65951	7.83019	8.08573	7.89192	7.79269	7.378	7.56167	7.92708	7.21617	7.17385
Anapc11	11	120598421	120608198	+	0.00884012	Anapc11	ENSMUSG00000025135	anaphase promoting complex subunit 11 [Source:MGI Symbol;Acc:MGI:1913406]	gene	overlapping	0	6.21647	5.55255	6.28212	6.063	5.21885	5.83336	5.66419	6.56562	5.9028	6.53317	7.06	6.75296	6.5545	6.52445	6.84165	6.51682	6.72551	5.88463	5.48164	6.17385
Hmgn1	16	96120618	96127729	-	0.000225124	Hmgn1	ENSMUSG00000040681	high mobility group nucleosomal binding domain 1 [Source:MGI Symbol;Acc:MGI:96120]	gene	overlapping	0	7.39884	7.77017	7.08347	7.23686	7.53976	6.90125	7.77799	6.7425	7.15795	7.71588	8.43852	7.70512	7.85882	7.7209	7.95655	7.73874	8.17487	7.83184	7.18896	7.50735
Tmem20	19	38395980	38405607	+	0.00713149	Tmem20	ENSMUSG00000044026	transmembrane protein 20 [Source:MGI Symbol;Acc:MGI:2444789]	gene	overlapping	0	6.58993	7.98641	7.13741	8.1308	6.68749	7.25941	7.85035	7.48651	7.94335	7.52674	8.22659	7.92393	8.07668	7.92089	8.0461	8.11605	7.98677	8.3499	7.48406	7.90345
Rab11a	9	64715299	64737758	-	0.0019428	Rab11a	ENSMUSG00000004771	RAB11a, member RAS oncogene family [Source:MGI Symbol;Acc:MGI:1858202]	gene	overlapping	0	7.2489	7.8364	7.17819	5.98361	6.68932	6.54446	6.87408	6.98137	7.0403	6.46972	7.74671	7.16531	7.1011	7.87501	7.50897	7.23748	7.82093	7.4793	7.01392	7.04521
Acd	8	105698159	105701095	-	0.00439177	Acd	ENSMUSG00000038000	adrenocortical dysplasia [Source:MGI Symbol;Acc:MGI:87873]	gene	overlapping	0	5.8745	6.5281	6.60045	6.45223	5.55292	5.68516	5.63671	6.11401	6.04398	6.46748	6.9522	6.75296	6.70296	6.46039	7.13348	5.98705	7.10238	6.20539	6.15971	6.10021
Rnf115	3	96727611	96791155	+	9.37501e-05	Rnf115	ENSMUSG00000028098	ring finger protein 115 [Source:MGI Symbol;Acc:MGI:1915095]	gene	overlapping	0	7.63268	7.065	8.14072	7.75974	7.60438	7.22129	7.82987	7.49702	7.14319	7.08785	8.29781	7.74284	8.00084	7.9288	8.0739	7.85847	8.42399	8.29052	7.38901	7.77299
Pum1	4	130663321	130781564	+	0.0113779	Pum1	ENSMUSG00000028580	pumilio 1 (Drosophila) [Source:MGI Symbol;Acc:MGI:1931749]	gene	overlapping	0	6.5644	7.53118	7.11406	6.67212	7.01601	6.17573	6.15737	7.10227	7.01807	7.52888	8.49766	7.09598	7.46226	6.83411	7.44109	7.34296	7.29339	7.28167	6.79919	7.42142
Ndnl2	7	64867052	64872997	-	0.014852	Ndnl2	ENSMUSG00000070520	necdin-like 2 [Source:MGI Symbol;Acc:MGI:1913897]	gene	overlapping	0	5.4009	5.35817	7.03988	6.09398	6.18804	5.51549	6.09816	7.02971	6.19476	6.02835	7.24802	6.72582	6.99124	7.04591	6.73068	6.36703	6.16786	6.44406	6.28587	6.29824
Rnd2	11	101464999	101471853	+	0.0231607	Rnd2	ENSMUSG00000001313	Rho family GTPase 2 [Source:MGI Symbol;Acc:MGI:1338755]	gene	overlapping	0	6.46144	5.88655	6.42992	5.8902	5.77301	6.05084	6.81646	6.44061	6.23387	6.53744	6.52384	5.5089	7.37746	7.42468	7.15423	6.5052	6.86301	6.65566	6.15515	6.33997
Ubr3	2	69897246	70024013	+	0.0351327	Ubr3	ENSMUSG00000044308	ubiquitin protein ligase E3 component n-recognin 3 [Source:MGI Symbol;Acc:MGI:1861100]	gene	overlapping	0	5.51193	7.88895	7.30586	7.09603	7.1737	6.41169	6.54803	7.29171	7.40831	7.41965	7.2399	7.35796	7.04656	7.90986	7.10369	8.07113	7.7827	7.51464	7.38188	8.04707
Cramp1l	17	24961228	25015230	-	0.0481345	Cramp1l	ENSMUSG00000038002	Crm, cramped-like (Drosophila) [Source:MGI Symbol;Acc:MGI:1930190]	gene	overlapping	0	5.4335	5.33721	6.4054	5.70727	5.67643	5.74206	5.32858	6.45607	4.92687	6.64436	5.57965	5.92632	6.74598	6.80663	5.89916	6.53654	6.60383	6.62801	5.56867	6.33539
Cdc73	1	143598797	143702893	-	0.00695373	Cdc73	ENSMUSG00000026361	cell division cycle 73, Paf1/RNA polymerase II complex component, homolog (S. cerevisiae) [Source:MGI Symbol;Acc:MGI:2384876]	gene	overlapping	0	6.46144	7.79087	7.22876	6.69789	6.91145	7.07013	7.0427	7.59246	7.28131	6.59395	7.209	7.22566	7.15857	7.45618	7.29052	7.8552	7.6199	8.14145	7.13756	8.22383
Hmg20b	10	81346048	81350480	-	0.0338475	Hmg20b	ENSMUSG00000020232	high mobility group 20 B [Source:MGI Symbol;Acc:MGI:1341190]	gene	overlapping	0	5.78258	6.41595	6.17013	5.65005	5.41783	6.14986	5.92722	5.26211	6.32523	6.32392	6.52048	5.94527	6.34661	6.08456	6.86108	6.87405	7.30622	5.77232	6.13525	5.80369
Fnta	8	25998729	26015601	-	0.00967823	Fnta	ENSMUSG00000015994	farnesyltransferase, CAAX box, alpha [Source:MGI Symbol;Acc:MGI:104683]	gene	overlapping	0	5.62211	7.43581	6.1473	5.88549	5.43979	6.14114	6.07377	6.6133	6.49046	6.71965	6.74671	6.65276	6.61822	6.90986	6.83713	7.03866	7.19723	6.78332	6.58907	6.79816
Gng5	3	146499834	146505572	+	0.00923943	Gng5	ENSMUSG00000068523	guanine nucleotide binding protein (G protein), gamma 5 [Source:MGI Symbol;Acc:MGI:109164]	gene	overlapping	0	5.71124	6.16553	4.79549	4.64727	5.04065	4.81702	4.72286	5.7425	5.16133	5.69115	6.29193	5.68271	5.76702	5.81716	6.05521	5.44213	6.13629	5.67773	5.38901	5.39526
Ppp1r2	16	31251537	31275277	-	0.0231067	Ppp1r2	ENSMUSG00000047714	protein phosphatase 1, regulatory (inhibitor) subunit 2 [Source:MGI Symbol;Acc:MGI:1914099]	gene	overlapping	0	7.13704	8.8176	8.35079	6.97253	7.94332	7.28671	7.37423	8.53392	7.57157	6.94874	9.0285	8.06111	8.13324	8.85022	8.343	7.95382	8.27829	8.10117	7.60028	8.04053
Mep1b	18	21072344	21100199	+	0.0284948	Mep1b	ENSMUSG00000024313	meprin 1 beta [Source:MGI Symbol;Acc:MGI:96964]	gene	overlapping	0	5.47325	7.33897	7.34507	7.68371	6.84389	6.7847	7.12015	7.09833	6.65639	7.03743	7.86637	7.28079	7.25221	7.20573	7.56835	7.77585	8.20942	7.02902	6.67216	7.36788
Spna2	2	29965560	30031451	+	0.0126821	Spna2	ENSMUSG00000057738	spectrin alpha 2 [Source:MGI Symbol;Acc:MGI:98386]	gene	overlapping	0	6.38432	7.47471	6.1473	7.06196	7.33472	6.51211	7.44406	6.80422	7.60924	7.2346	7.72066	7.46935	7.34661	7.17228	7.25481	7.76475	8.1307	7.32644	7.30038	7.53223
Ddx50	10	62616023	62651218	-	0.0257929	Ddx50	ENSMUSG00000020076	DEAD (Asp-Glu-Ala-Asp) box polypeptide 50 [Source:MGI Symbol;Acc:MGI:2182303]	gene	overlapping	0	5.57904	6.36509	5.26404	5.33436	5.94255	6.02894	5.52123	6.18254	5.33126	5.28631	5.93216	6.68694	5.67412	5.52766	5.69449	6.10839	6.54012	6.30913	5.94085	6.84292
Kif5b	18	6201002	6242174	-	0.00963754	Kif5b	ENSMUSG00000006740	kinesin family member 5B [Source:MGI Symbol;Acc:MGI:1098268]	gene	overlapping	0	7.22115	8.82578	7.83887	8.08835	8.17173	7.71193	8.03219	8.44914	8.49851	8.45736	9.42558	8.68729	8.17682	8.46081	7.89482	8.75707	8.43246	8.41453	8.4783	9.09096
Bach1	16	87698945	87733346	+	0.0270428	Bach1	ENSMUSG00000025612	BTB and CNC homology 1 [Source:MGI Symbol;Acc:MGI:894680]	gene	overlapping	0	7.33555	8.08923	7.38603	7.68303	7.87323	7.47208	7.94189	7.41394	7.73346	6.96311	8.78771	7.83019	7.5263	7.68542	6.85959	8.1372	7.629	8.4696	8.05687	8.7063
Actb	5	142903115	142906754	-	0.0331947	Actb	ENSMUSG00000029580	actin, beta [Source:MGI Symbol;Acc:MGI:87904]	gene	overlapping	0	7.10703	6.87448	5.86108	6.29402	6.93019	6.32059	6.79176	6.12179	6.51889	7.14359	7.8571	6.69256	7.5985	6.84958	6.44999	6.87276	7.68025	6.66419	6.66042	6.87376
Cdc27	11	104502745	104550620	-	0.0131984	Cdc27	ENSMUSG00000020687	cell division cycle 27 homolog (S. cerevisiae) [Source:MGI Symbol;Acc:MGI:102685]	gene	overlapping	0	7.48107	8.37026	7.47775	8.06613	8.02403	7.78096	8.31651	7.5513	7.86039	8.45793	9.21627	7.75095	8.2203	7.96772	7.71188	8.456	8.53528	8.59537	8.17965	8.89595
Vti1b	12	79156017	79172667	-	0.0244803	Vti1b	ENSMUSG00000021124	vesicle transport through interaction with t-SNAREs 1B homolog [Source:MGI Symbol;Acc:MGI:1855688]	gene	overlapping	0	4.66393	5.72382	6.10732	5.57883	5.60826	5.58148	5.58012	4.90456	5.75827	5.76592	5.43763	5.94762	5.68776	6.36493	6.74362	5.69701	6.13629	5.90205	5.55951	6.24391
Cox5a	9	57521232	57532424	+	0.0146851	Cox5a	ENSMUSG00000000088	cytochrome c oxidase, subunit Va [Source:MGI Symbol;Acc:MGI:88474]	gene	overlapping	0	6.55331	7.14155	6.42722	6.0462	5.83065	5.61757	6.33544	6.80904	6.21444	6.11098	7.61935	6.70094	6.98711	6.78534	7.00505	6.59099	7.2079	6.64363	5.41209	6.26653
Ccz1	5	143987916	144014853	-	0.00186718	Ccz1	ENSMUSG00000029617	CCZ1 vacuolar protein trafficking and biogenesis associated homolog (S. cerevisiae) [Source:MGI Symbol;Acc:MGI:2141070]	gene	overlapping	0	6.61147	7.29978	7.31321	7.11528	6.51825	6.46743	6.99155	7.13145	7.32221	7.51811	7.8977	7.44125	7.22674	7.41345	8.03824	7.28586	7.57468	7.81048	6.59356	7.38718
Pdss1	2	22895522	22940266	+	0.048017	Pdss1	ENSMUSG00000026784	prenyl (solanesyl) diphosphate synthase, subunit 1 [Source:MGI Symbol;Acc:MGI:1889278]	gene	overlapping	0	5.92123	6.27978	6.26404	6.06091	6.5848	5.4744	6.32859	6.24797	5.81095	6.30899	7.01308	7.11389	4.80193	6.66807	5.83108	6.77793	7.23647	6.36463	6.13525	6.71014
Ulk4	9	120960268	121277197	-	0.0287558	Ulk4	ENSMUSG00000040936	unc-51-like kinase 4 (C. elegans) [Source:MGI Symbol;Acc:MGI:1921622]	gene	overlapping	0	4.01578	5.44563	4.39159	4.1927	5.01162	4.55325	3.78426	4.18254	4.23172	4.596	5.27214	4.98474	4.59307	4.37921	4.80045	4.76545	5.40358	4.90205	5.16576	5.08211
Ube2d2	18	35771559	35807172	+	0.00434904	Ube2d2	ENSMUSG00000091896	ubiquitin-conjugating enzyme E2D 2 [Source:MGI Symbol;Acc:MGI:1930715]	gene	overlapping	0	7.25803	8.79472	7.98025	7.47045	7.14725	7.21368	7.22167	7.8761	7.9525	7.48861	8.96643	8.05294	8.22966	8.07746	8.23146	7.89011	8.02606	8.17884	7.8113	7.89932
Appl1	14	26918988	26971232	-	0.00295369	Appl1	ENSMUSG00000040760	adaptor protein, phosphotyrosine interaction, PH domain and leucine zipper containing 1 [Source:MGI Symbol;Acc:MGI:1920243]	gene	overlapping	0	6.99954	6.16156	6.38882	6.57883	6.66901	6.55544	6.61715	6.24441	6.28442	6.25031	6.68518	6.8962	6.80975	6.83282	6.7127	6.4646	7.05421	7.4657	6.8442	7.30372
Mpp4	1	59120936	59163389	-	0.0110821	Mpp4	ENSMUSG00000079550	membrane protein, palmitoylated 4 (MAGUK p55 subfamily member 4) [Source:MGI Symbol;Acc:MGI:2386681]	gene	overlapping	0	4.32473	6.64072	5.88493	5.62481	6.04065	5.92432	6.09007	6.21925	5.75229	6.04945	6.9987	6.31489	6.16346	6.33042	6.60869	6.09294	6.68025	6.31781	6.04297	5.96845
Utp18	11	93859243	93885766	-	0.00141949	Utp18	ENSMUSG00000054079	UTP18, small subunit (SSU) processome component, homolog (yeast) [Source:MGI Symbol;Acc:MGI:1923402]	gene	overlapping	0	6.92983	7.83266	8.15876	6.94561	6.92397	6.32958	6.759	7.70546	6.80807	6.97892	8.13533	7.57655	7.48392	7.40125	7.7258	7.66676	8.00349	7.67689	7.31542	7.61954
Syngr1	15	80091334	80119501	+	0.000202361	Syngr1	ENSMUSG00000022415	synaptogyrin 1 [Source:MGI Symbol;Acc:MGI:1328323]	gene	overlapping	0	6.71787	7.22379	6.82866	7.02278	6.45496	6.63425	7.09614	6.76998	6.86454	7.12383	8.02614	7.07355	7.51582	6.9451	7.65137	7.25048	7.54854	7.16989	6.62574	6.91116
Gnai3	3	108107280	108146146	-	0.018461	Gnai3	ENSMUSG00000000001	guanine nucleotide binding protein (G protein), alpha inhibiting 3 [Source:MGI Symbol;Acc:MGI:95773]	gene	overlapping	0	5.88042	8.11203	6.85304	6.99678	7.616	6.88392	7.59162	7.09636	6.7463	6.73089	7.73084	7.69326	7.05711	7.51397	7.58911	7.91731	7.84945	7.75485	7.14906	7.52086
4921523A10Rik	17	53507460	53539451	-	0.00622382	4921523A10Rik	ENSMUSG00000044957	RIKEN cDNA 4921523A10 gene [Source:MGI Symbol;Acc:MGI:3612067]	gene	overlapping	0	4.76987	5.60025	5.21472	4.43136	4.74858	4.26277	4.5332	5.35742	4.85621	4.77319	6.03439	5.15721	5.47608	5.11902	5.13102	5.00131	5.54012	5.83411	4.66149	4.8706
Dnajc2	5	21757267	21785251	-	0.0336495	Dnajc2	ENSMUSG00000029014	DnaJ (Hsp40) homolog, subfamily C, member 2 [Source:MGI Symbol;Acc:MGI:99470]	gene	overlapping	0	7.57357	8.9655	7.4054	7.37529	6.68197	6.83787	7.58875	8.45991	8.00431	8.3233	8.78561	8.24156	8.26308	8.19668	8.2565	8.30323	8.61246	8.35201	7.71146	8.15968
Serinc3	2	163623272	163645131	-	0.0282518	Serinc3	ENSMUSG00000017707	serine incorporator 3 [Source:MGI Symbol;Acc:MGI:1349457]	gene	overlapping	0	5.93268	5.77147	5.5291	5.97253	6.09424	4.88131	5.94973	6.49252	5.65319	5.99143	6.14298	6.30391	6.32713	6.73346	5.412	6.05242	5.9345	6.54729	5.87037	7.02261
Rbms2	10	128129470	128180297	-	0.047653	Rbms2	ENSMUSG00000040043	RNA binding motif, single stranded interacting protein 2 [Source:MGI Symbol;Acc:MGI:1861776]	gene	overlapping	0	6.50428	6.07558	6.46462	6.62198	6.45712	6.92432	6.26898	6.73745	7.28649	7.07467	7.28404	6.82508	7.62975	7.58732	7.52029	6.97866	6.88787	6.27612	6.98855	6.44569
Uchl3	14	101653967	101696124	+	0.00742847	Uchl3	ENSMUSG00000022111	ubiquitin carboxyl-terminal esterase L3 (ubiquitin thiolesterase) [Source:MGI Symbol;Acc:MGI:1355274]	gene	overlapping	0	5.48107	7.21997	6.58355	6.37361	5.98199	5.56852	6.4055	5.91802	6.12249	6.26069	6.9372	6.83908	6.74271	6.76236	6.86848	6.18743	7.11378	6.48509	6.15971	6.57169
Diap3	14	86655367	87141224	-	0.0445413	Diap3	ENSMUSG00000022021	diaphanous homolog 3 (Drosophila) [Source:MGI Symbol;Acc:MGI:1927222]	gene	overlapping	0	4.59354	6.07136	6.29996	5.15402	5.88928	5.48593	4.75389	6.57698	5.90549	6.11671	6.67918	6.14496	6.65341	5.91355	6.15544	6.25247	5.55452	6.30259	5.89242	6.38496
Jtb	3	90231597	90235838	+	0.000149584	Jtb	ENSMUSG00000027937	jumping translocation breakpoint [Source:MGI Symbol;Acc:MGI:1346082]	gene	overlapping	0	7.1857	7.645	7.33357	7.12231	6.70028	6.86638	6.96749	6.53683	7.03908	7.33255	8.25812	7.42868	7.49172	7.39511	7.54821	7.42283	7.63353	7.28721	7.10645	7.32157
Fam108a	10	80583649	80590341	-	0.047653	Fam108a	ENSMUSG00000003346	family with sequence similarity 108, member A [Source:MGI Symbol;Acc:MGI:106388]	gene	overlapping	0	5.7441	7.29073	7.65231	6.34298	5.65407	6.08157	6.35917	7.21016	7.00682	7.09802	7.29585	7.29193	7.62887	6.99232	7.7958	6.74016	7.25275	7.20188	6.7161	6.67916
Letm1	5	33739673	33782817	-	0.0469153	Letm1	ENSMUSG00000005299	leucine zipper-EF-hand containing transmembrane protein 1 [Source:MGI Symbol;Acc:MGI:1932557]	gene	overlapping	0	6.2489	5.02405	6.29996	5.84235	5.66902	5.69115	5.78426	5.21925	6.07063	6.16723	6.05306	6.29101	6.74923	6.13383	6.03166	6.28392	6.96537	6.39775	5.50568	5.6695
Cisd2	3	135406412	135423925	-	0.0458763	Cisd2	ENSMUSG00000028165	CDGSH iron sulfur domain 2 [Source:MGI Symbol;Acc:MGI:1914256]	gene	overlapping	0	5.45748	6.34773	5.87702	5.34126	4.74153	5.67714	5.71237	5.13722	5.95835	5.27612	6.01546	6.07785	5.74435	6.62676	5.80663	5.82546	5.31047	6.71927	5.89425	5.71954
Bcl7b	5	135168283	135181855	+	0.000990772	Bcl7b	ENSMUSG00000029681	B cell CLL/lymphoma 7B [Source:MGI Symbol;Acc:MGI:1332238]	gene	overlapping	0	6.67079	6.61193	6.55658	6.35497	6.42665	6.36499	6.75133	5.90906	6.22742	5.83701	7.49851	6.99387	6.60929	6.45534	6.68278	6.88178	6.74238	6.59626	6.23787	7.03207
Derl1	15	57869502	57892418	-	0.0107562	Derl1	ENSMUSG00000022365	Der1-like domain family, member 1 [Source:MGI Symbol;Acc:MGI:1915069]	gene	overlapping	0	5.05821	6.71843	6.70014	6.75458	6.21121	6.0982	6.50308	6.51927	6.26567	6.40335	6.40892	7.22469	7.13012	6.88129	6.50612	6.96539	6.58524	6.88463	6.67003	6.47789
Mboat2	12	24831599	24960301	+	0.0467477	Mboat2	ENSMUSG00000020646	membrane bound O-acyltransferase domain containing 2 [Source:MGI Symbol;Acc:MGI:1914466]	gene	overlapping	0	7.19761	6.86475	7.02922	7.01955	6.26386	6.5847	6.715	7.62566	6.83659	7.42312	6.95468	7.303	6.96207	7.52445	7.76202	7.81809	8.25863	6.78019	6.25641	7.51142
Pdcd2	17	15519208	15527301	-	0.0467477	Pdcd2	ENSMUSG00000014771	programmed cell death 2 [Source:MGI Symbol;Acc:MGI:104643]	gene	overlapping	0	5.19761	6.08818	6.10732	5.46335	4.45281	5.41772	4.28676	5.69637	5.4724	5.40335	6.36101	5.91194	5.40766	6.1485	6.07069	5.72878	5.0843	5.82501	5.81756	5.90808
Hnrpll	17	80029487	80062334	-	0.000303896	Hnrpll	ENSMUSG00000024095	heterogeneous nuclear ribonucleoprotein L-like [Source:MGI Symbol;Acc:MGI:1919942]	gene	overlapping	0	7.16643	8.34248	8.08261	7.30112	7.76346	7.1743	7.74104	7.46833	7.26042	7.87635	8.52551	7.97093	8.13137	8.03637	7.81891	7.95076	7.98589	8.5066	7.66737	7.90396
Arhgef3	14	27238039	27403904	+	0.0058819	Arhgef3	ENSMUSG00000021895	Rho guanine nucleotide exchange factor (GEF) 3 [Source:MGI Symbol;Acc:MGI:1918954]	gene	overlapping	0	6.23971	7.5419	7.27912	7.16962	6.88609	7.02736	7.45354	6.45915	7.07063	7.16999	7.67316	7.21398	7.48588	7.79868	7.01575	7.57439	7.72126	7.69115	6.83664	7.47095
Nipbl	15	8291225	8444463	-	0.00723715	Nipbl	ENSMUSG00000022141	Nipped-B homolog (Drosophila) [Source:MGI Symbol;Acc:MGI:1913976]	gene	overlapping	0	6.57174	6.17343	7.50622	7.39035	7.39665	7.3057	7.41362	7.66611	7.27403	7.30021	8.26515	7.59992	7.82295	7.66005	7.33073	7.57519	7.33292	7.52311	7.44852	7.74909
Tmed2	5	124540695	124550506	+	5.44086e-05	Tmed2	ENSMUSG00000029390	transmembrane emp24 domain trafficking protein 2 [Source:MGI Symbol;Acc:MGI:1929269]	gene	overlapping	0	7.5845	7.76364	8.10309	7.7455	7.56695	7.15203	7.35749	8.45145	7.66754	8.05617	8.64034	8.21154	8.26194	8.16199	8.06491	8.06775	8.39693	8.22686	7.61196	7.99627
Pcnp	16	56007245	56029739	-	0.0367545	Pcnp	ENSMUSG00000071533	PEST proteolytic signal containing nuclear protein [Source:MGI Symbol;Acc:MGI:1923552]	gene	overlapping	0	5.80144	6.59437	6.58597	6.37361	6.52853	5.48593	6.51521	5.84942	6.19476	5.72528	7.67165	6.34731	6.86484	6.5436	5.97244	6.26828	5.96717	6.77705	6.27051	6.50396
B3gat3	19	8920374	8927234	+	0.0267593	B3gat3	ENSMUSG00000071649	beta-1,3-glucuronyltransferase 3 (glucuronosyltransferase I) [Source:MGI Symbol;Acc:MGI:1919977]	gene	overlapping	0	5.26257	4.60025	4.35791	4.20789	4.69115	4.75736	4.96307	4.46527	4.65958	4.70642	5.43763	4.99841	4.17561	5.29507	4.80045	5.46632	5.149	5.37089	5.08826	4.5923
Cnih	14	46775582	46788411	-	0.00714692	Cnih	ENSMUSG00000015759	cornichon homolog (Drosophila) [Source:MGI Symbol;Acc:MGI:1277202]	gene	overlapping	0	5.90969	7.06924	6.55658	7.06717	6.90357	6.51436	6.89743	6.7675	6.67703	6.80545	7.82214	7.38684	6.90481	7.22957	6.96417	6.61128	7.18648	7.45098	6.56639	6.76223
Mrpl3	9	105053239	105077466	+	0.0158487	Mrpl3	ENSMUSG00000032563	mitochondrial ribosomal protein L3 [Source:MGI Symbol;Acc:MGI:2137204]	gene	overlapping	0	6.15426	6.86718	6.85707	6.16379	6.35219	5.97594	6.34905	7.49702	6.84363	6.83874	7.81395	7.19233	6.67583	6.62076	7.50517	7.03173	7.10891	6.70114	6.21909	6.95459
Wasl	6	24613805	24665009	-	0.00479179	Wasl	ENSMUSG00000029684	Wiskott-Aldrich syndrome-like (human) [Source:MGI Symbol;Acc:MGI:1920428]	gene	overlapping	0	6.99135	7.43087	6.78074	6.84356	5.94869	6.4581	6.3957	7.60222	6.92952	7.19861	7.66711	7.42024	7.3942	7.07582	7.35623	7.1431	7.16942	7.63584	6.92667	7.23902
Rad51	2	119112793	119147445	+	0.0243281	Rad51	ENSMUSG00000027323	RAD51 homolog (S. cerevisiae) [Source:MGI Symbol;Acc:MGI:97890]	gene	overlapping	0	6.28508	6.73722	7.1473	7.43459	7.57094	7.0313	7.90896	7.24084	7.37079	7.01768	8.21523	7.82444	7.34338	7.33593	7.8514	7.32229	7.59456	7.90349	6.8442	7.53357
Tbc1d23	16	57168866	57231466	-	0.0467477	Tbc1d23	ENSMUSG00000022749	TBC1 domain family, member 23 [Source:MGI Symbol;Acc:MGI:1914831]	gene	overlapping	0	6.33339	5.98865	6.70238	5.20411	6.51412	5.70108	5.73846	5.77245	5.4724	6.45398	6.85975	6.35972	6.50141	6.17944	5.95029	6.18951	7.24685	5.99966	5.84043	6.71602
Lsm2	17	34981862	34985891	+	0.0258673	Lsm2	ENSMUSG00000007050	LSM2 homolog, U6 small nuclear RNA associated (S. cerevisiae) [Source:MGI Symbol;Acc:MGI:90676]	gene	overlapping	0	6.32907	7.10067	6.16364	6.10213	6.10528	5.9294	6.21053	7.0482	6.14319	6.76774	7.53051	7.00068	7.19962	6.96417	7.18538	6.378	6.6199	6.64707	5.78845	6.23411
Ylpm1	12	84996321	85070515	+	0.00162936	Ylpm1	ENSMUSG00000021244	YLP motif containing 1 [Source:MGI Symbol;Acc:MGI:1926195]	gene	overlapping	0	6.25347	7.24457	6.58111	6.47595	6.87485	6.57285	6.64501	6.89097	6.39783	6.47196	7.12984	7.63244	7.30296	6.54835	7.19248	7.09958	6.629	6.7127	6.90242	7.04146
Ppp2ca	11	52098681	52127778	+	0.00520673	Ppp2ca	ENSMUSG00000020349	protein phosphatase 2 (formerly 2A), catalytic subunit, alpha isoform [Source:MGI Symbol;Acc:MGI:1321159]	gene	overlapping	0	7.27836	8.81192	7.82763	7.65005	7.75385	7.26746	7.69516	8.47669	7.65238	7.98205	9.08801	8.28544	8.01714	8.08402	8.34778	8.18535	8.62161	8.18893	7.76673	7.989
Ube2a	X	36874358	36884215	+	0.0383618	Ube2a	ENSMUSG00000016308	ubiquitin-conjugating enzyme E2A, RAD6 homolog (S. cerevisiae) [Source:MGI Symbol;Acc:MGI:102959]	gene	overlapping	0	6.49272	7.26321	7.77437	6.75716	6.20865	6.60494	7.31131	6.83056	6.31311	6.6796	8.08177	6.72582	7.59669	7.32674	7.20656	6.29553	6.86686	7.69115	7.355	6.88842
Tulp4	17	6106437	6251128	+	0.000527184	Tulp4	ENSMUSG00000034377	tubby like protein 4 [Source:MGI Symbol;Acc:MGI:1916092]	gene	overlapping	0	7.50811	7.11306	7.43935	6.68438	7.18154	6.62802	7.34735	7.21381	6.88925	7.06138	7.74096	7.67421	7.718	7.6049	7.80432	7.72305	7.71486	7.03298	6.68485	7.03489
Rbpj	5	53555779	53657445	+	0.0109688	Rbpj	ENSMUSG00000039191	recombination signal binding protein for immunoglobulin kappa J region [Source:MGI Symbol;Acc:MGI:96522]	gene	overlapping	0	8.05952	8.56537	8.21001	7.91586	7.62657	7.56472	7.38583	8.35082	8.28649	7.89978	8.93531	7.77696	8.23664	7.66734	8.09298	8.67085	9.09952	8.41048	8.03679	8.51209
2010107E04Rik	12	111961376	111966977	-	0.0160152	2010107E04Rik	ENSMUSG00000021290	RIKEN cDNA 2010107E04 gene [Source:MGI Symbol;Acc:MGI:1917507]	gene	overlapping	0	4.17851	5.66896	5.32342	4.92508	4.47849	4.47208	4.84316	5.18996	4.99422	5.42658	5.56019	5.58035	5.69791	5.36493	5.75005	4.94831	5.68244	5.25368	4.82331	4.98803
Cyc1	15	76343523	76345934	+	0.045268	Cyc1	ENSMUSG00000022551	cytochrome c-1 [Source:MGI Symbol;Acc:MGI:1913695]	gene	overlapping	0	7.23509	6.68564	6.92956	6.11024	6.16714	6.0967	6.44406	7.28307	6.50652	6.95355	7.82757	7.09492	6.4956	6.75416	7.47057	7.09294	7.77144	6.60692	6.14294	6.58589
Pi4k2b	5	52741587	52769344	+	0.0291157	Pi4k2b	ENSMUSG00000029186	phosphatidylinositol 4-kinase type 2 beta [Source:MGI Symbol;Acc:MGI:1914323]	gene	overlapping	0	6.51954	7.79984	6.11742	6.78907	6.26386	6.74973	6.60869	6.75005	6.9001	6.95195	7.36662	6.87782	7.26706	6.92089	6.67436	7.37252	7.21849	7.8074	6.95314	7.18237
Mbd3	10	80392539	80399550	-	4.63795e-05	Mbd3	ENSMUSG00000035478	methyl-CpG binding domain protein 3 [Source:MGI Symbol;Acc:MGI:1333812]	gene	overlapping	0	7.39056	7.56011	7.14072	7.02813	6.91929	6.5696	7.16509	7.39641	7.06702	7.25421	7.92837	7.47995	7.75086	7.55936	7.73068	7.42195	7.95455	7.38438	6.81082	7.13399
Ccne1	7	38097984	38107534	-	0.00214243	Ccne1	ENSMUSG00000002068	cyclin E1 [Source:MGI Symbol;Acc:MGI:88316]	gene	overlapping	0	7.02917	8.42509	7.44738	7.79788	8.13586	7.41471	7.76536	7.59665	7.75752	7.93989	8.49168	7.95816	8.11946	7.96536	8.37142	8.26138	8.42071	8.22167	7.55145	7.99385
Cebpg	7	35046422	35056503	-	0.0467938	Cebpg	ENSMUSG00000056216	CCAAT/enhancer binding protein (C/EBP), gamma [Source:MGI Symbol;Acc:MGI:104982]	gene	overlapping	0	7.06343	8.24457	7.06097	7.41346	8.07753	7.51211	8.02691	7.32072	7.26357	7.38686	8.51544	8.17437	8.27894	8.4981	8.23089	7.55841	7.48854	7.65051	7.51815	7.07114
Rnf214	9	45863425	45906894	-	0.0243127	Rnf214	ENSMUSG00000042790	ring finger protein 214 [Source:MGI Symbol;Acc:MGI:2444451]	gene	overlapping	0	6.32473	6.73988	6.97285	6.10822	6.66343	6.30114	6.42169	6.47441	5.23601	5.84737	7.4071	6.37727	7.02253	7.23842	6.63671	6.33172	6.35777	6.96555	6.34704	6.26973
Nktr	9	121719181	121756841	+	0.0486266	Nktr	ENSMUSG00000032525	natural killer tumor recognition sequence [Source:MGI Symbol;Acc:MGI:97346]	gene	overlapping	0	6.34629	7.73988	8.1822	7.5612	8.08591	7.07089	7.69382	6.97495	7.2937	6.97104	8.04025	7.89924	7.8894	8.16766	8.47203	7.42371	7.66041	7.88171	7.03225	7.68817
Pafah1b2	9	45965311	45984871	-	0.000240806	Pafah1b2	ENSMUSG00000003131	platelet-activating factor acetylhydrolase, isoform 1b, subunit 2 [Source:MGI Symbol;Acc:MGI:108415]	gene	overlapping	0	7.51384	8.20173	8.03101	7.66801	7.97148	7.75212	7.93852	7.97172	7.73952	7.88392	8.67165	7.97324	8.51678	8.49974	8.4386	7.84338	7.60152	8.57062	7.85267	8.13794
Akirin1	4	123734559	123750345	-	0.0108133	Akirin1	ENSMUSG00000023075	akirin 1 [Source:MGI Symbol;Acc:MGI:1915300]	gene	overlapping	0	7.86108	8.56987	7.8869	7.37529	6.81225	7.12647	7.22905	8.08447	7.85203	7.97104	8.76027	7.8103	8.21265	7.91477	8.29931	8.04785	8.31541	8.23031	7.48949	7.88059
Gpr137b	13	13357623	13393624	-	7.8144e-05	Gpr137b	ENSMUSG00000021306	G protein-coupled receptor 137B [Source:MGI Symbol;Acc:MGI:1891463]	gene	overlapping	0	8.57722	8.85002	8.79339	8.44464	7.7652	8.125	8.37006	8.6043	8.63138	8.7069	9.46491	8.57959	8.92403	8.67532	8.74161	8.91606	9.30267	8.69157	8.491	8.78002
Marcksl1	4	129513581	129515985	+	0.0342423	Marcksl1	ENSMUSG00000047945	MARCKS-like 1 [Source:MGI Symbol;Acc:MGI:97143]	gene	overlapping	0	7.08154	7.13549	7.1191	6.69115	7.05921	6.0967	6.867	7.7823	6.94531	7.38568	7.89253	6.59542	7.66467	7.39335	7.72987	7.456	8.21472	6.68278	6.88694	7.00253
Ovol2	2	144305175	144332146	-	0.0351355	Ovol2	ENSMUSG00000037279	ovo-like 2 (Drosophila) [Source:MGI Symbol;Acc:MGI:1338039]	gene	overlapping	0	7.0398	6.11306	7.25492	6.21917	6.24153	5.97758	6.39242	6.47441	6.47422	7.19591	7.4951	7.05076	7.42914	7.29036	7.11119	6.71875	6.77759	6.23776	6.58343	6.52153
Nfatc3	8	106059603	106130537	+	0.00709526	Nfatc3	ENSMUSG00000031902	nuclear factor of activated T cells, cytoplasmic, calcineurin dependent 3 [Source:MGI Symbol;Acc:MGI:103296]	gene	overlapping	0	6.10451	7.72919	7.03101	6.47438	7.0262	6.42013	6.96969	7.56562	6.92819	7.48308	7.62091	7.20123	7.78696	7.54676	7.62014	7.13881	7.1803	7.43012	7.18747	7.37756
Rcc2	4	140700541	140723220	+	0.00894529	Rcc2	ENSMUSG00000040945	regulator of chromosome condensation 2 [Source:MGI Symbol;Acc:MGI:1919784]	gene	overlapping	0	8.21178	7.22948	7.68324	7.62975	6.98946	7.13382	7.52123	7.69115	7.77972	7.7641	8.49339	7.72376	7.97046	7.75963	7.85438	7.98286	8.56226	7.94259	7.17178	7.7679
Strbp	2	37483228	37703859	-	0.0166023	Strbp	ENSMUSG00000026915	spermatid perinuclear RNA binding protein [Source:MGI Symbol;Acc:MGI:104626]	gene	overlapping	0	5.97206	7.2706	6.88493	6.42325	7.09563	6.67311	7.05313	7.38837	7.18037	6.82831	7.45353	7.32848	6.81908	7.31657	6.7127	7.41841	7.60498	7.23318	6.7233	7.82833
Dcaf12	4	41291300	41314889	-	0.0165107	Dcaf12	ENSMUSG00000028436	DDB1 and CUL4 associated factor 12 [Source:MGI Symbol;Acc:MGI:1916220]	gene	overlapping	0	6.50428	6.90328	7.45271	7.27161	7.40895	6.83065	6.87643	7.02142	7.46329	7.01155	6.9372	7.10549	7.6003	7.2675	7.39979	7.4246	7.78168	7.81585	7.03555	7.87954
Invs	4	48279760	48431954	+	0.00529227	Invs	ENSMUSG00000028344	inversin [Source:MGI Symbol;Acc:MGI:1335082]	gene	overlapping	0	3.88042	5.21232	4.77011	4.08167	4.40002	4.12205	4.1535	5.12952	4.28235	4.57119	5.19856	4.54351	5.13137	4.82762	5.09108	4.74299	5.01655	4.84316	4.41971	4.79705
0610010O12Rik	18	36345619	36402980	+	0.038661	0610010O12Rik	ENSMUSG00000046727	RIKEN cDNA 0610010O12 gene [Source:MGI Symbol;Acc:MGI:1913310]	gene	overlapping	0	7.1761	7.04359	7.1341	6.49928	6.2614	6.40076	6.87173	5.44682	6.72052	7.0329	7.7192	6.99159	7.28848	6.92211	7.37921	6.81742	7.16474	6.93203	6.5021	6.78367
D11Wsu99e	11	113661319	113684155	-	0.0301402	D11Wsu99e	ENSMUSG00000041629	DNA segment, Chr 11, Wayne State University 99, expressed [Source:MGI Symbol;Acc:MGI:106351]	gene	overlapping	0	5.48885	7.15359	7.02565	6.2833	6.72015	6.2398	6.47853	7.14487	6.39399	6.6562	7.48825	7.24968	7.37535	7.05261	7.38645	6.49347	6.60383	6.81432	6.27472	6.49851
Khdc1a	1	21349641	21352200	+	0.0304413	Khdc1a	ENSMUSG00000067750	KH domain containing 1A [Source:MGI Symbol;Acc:MGI:2676610]	gene	overlapping	0	6.68778	6.93386	7.41225	7.44664	6.43761	6.27079	7.62557	7.35081	7.38534	6.60824	8.28799	7.427	7.27612	7.38542	6.91641	6.89966	7.51333	7.5436	7.23212	7.37533
1700037C18Rik	16	3895179	3908689	-	0.0437615	1700037C18Rik	ENSMUSG00000005983	RIKEN cDNA 1700037C18 gene [Source:MGI Symbol;Acc:MGI:1920511]	gene	overlapping	0	5.08924	4.89614	4.70908	4.75458	3.51205	4.68316	4.80416	4.68066	4.5876	4.49412	4.87032	4.6339	5.34876	4.66807	5.3499	4.60039	5.53043	5.12609	4.55029	5.09299
Triml2	8	43183119	43193881	+	0.0458763	Triml2	ENSMUSG00000091490	tripartite motif family-like 2 [Source:MGI Symbol;Acc:MGI:3642989]	gene	overlapping	0	6.15426	7.10067	5.80386	6.2833	6.66343	6.69613	6.56562	6.26562	6.78631	6.47196	7.1753	6.99273	6.37219	7.36941	7.13348	7.18743	6.33848	6.38542	6.59356	6.67796
Spint2	7	29256331	29281977	-	0.000584714	Spint2	ENSMUSG00000074227	serine protease inhibitor, Kunitz type 2 [Source:MGI Symbol;Acc:MGI:1338031]	gene	overlapping	0	6.81697	6.10894	6.92956	6.78528	6.34523	5.99059	6.52123	6.55417	6.54849	6.82831	7.45704	6.8454	6.89455	7.03242	6.95447	7.03404	6.89165	6.62277	6.5021	6.77016
Serp1	3	58521969	58525873	-	0.0186565	Serp1	ENSMUSG00000027808	stress-associated endoplasmic reticulum protein 1 [Source:MGI Symbol;Acc:MGI:92638]	gene	overlapping	0	7.342	8.05326	7.957	7.28241	7.27856	6.76779	6.73587	7.56562	6.73422	6.96787	8.26815	7.67988	8.02388	7.53086	7.97587	6.95809	7.50223	7.93486	7.33501	7.18237
Uck2	1	167226090	167285127	-	0.00207473	Uck2	ENSMUSG00000026558	uridine-cytidine kinase 2 [Source:MGI Symbol;Acc:MGI:1931744]	gene	overlapping	0	6.93837	7.4683	6.8967	6.602	7.26509	6.80878	7.08601	7.26913	6.82809	6.93747	7.83838	7.1643	7.5858	7.38364	7.67267	7.15484	7.80596	7.36881	6.5641	6.69473
Mbtps1	8	119508156	119558761	-	0.0293153	Mbtps1	ENSMUSG00000031835	membrane-bound transcription factor peptidase, site 1 [Source:MGI Symbol;Acc:MGI:1927235]	gene	overlapping	0	5.88042	6.52501	6.51388	6.70861	6.5848	6.45927	6.64225	6.64333	7.14204	7.06138	6.72649	7.33209	6.82372	7.20071	7.12733	7.07169	6.83181	6.62277	6.47678	7.45416
Erp29	5	121428590	121452506	-	0.00399566	Erp29	ENSMUSG00000029616	endoplasmic reticulum protein 29 [Source:MGI Symbol;Acc:MGI:1914647]	gene	overlapping	0	6.47716	7.4795	7.83581	7.01848	7.08591	6.95036	6.56562	7.18626	7.13173	7.10667	7.60518	8.00351	7.23606	7.26366	7.36776	7.46374	7.44926	7.65051	7.2817	7.25203
Pafah1b1	11	74673949	74724670	-	3.76512e-05	Pafah1b1	ENSMUSG00000020745	platelet-activating factor acetylhydrolase, isoform 1b, subunit 1 [Source:MGI Symbol;Acc:MGI:109520]	gene	overlapping	0	7.70123	8.33457	7.77224	7.6952	7.47424	7.37866	7.68982	7.81025	7.84292	7.91135	8.67768	7.78751	8.27273	8.27802	7.78332	8.08179	8.18339	7.86922	8.1483	7.92848
Rab11b	17	33745950	33760530	-	0.0194997	Rab11b	ENSMUSG00000077450	RAB11B, member RAS oncogene family [Source:MGI Symbol;Acc:MGI:99425]	gene	overlapping	0	7.23509	6.89375	6.83887	7.07444	6.65969	7.08991	7.60444	6.67274	7.59513	7.22668	7.70893	7.0276	7.33582	7.50585	7.78332	7.32323	7.8926	7.64707	6.97225	7.13047
Fkbp1a	2	151542483	151561692	+	0.0185065	Fkbp1a	ENSMUSG00000032966	FK506 binding protein 1a [Source:MGI Symbol;Acc:MGI:95541]	gene	overlapping	0	6.46932	6.75313	6.30586	7.11629	6.20865	5.81702	6.08601	6.63791	6.60593	6.86619	7.27014	6.67279	6.79722	6.83022	6.80663	7.00131	6.36596	7.06555	6.59244	7.08028
Eif4ebp1	8	27260327	27275656	+	0.0461851	Eif4ebp1	ENSMUSG00000031490	eukaryotic translation initiation factor 4E binding protein 1 [Source:MGI Symbol;Acc:MGI:103267]	gene	overlapping	0	6.83538	7.24457	5.64069	6.48844	6.90357	6.28671	6.78426	6.44372	6.49225	7.18505	7.30172	6.99273	7.29741	7.05372	7.11119	6.87017	7.54734	6.79425	6.34437	6.61891
Cep76	18	67617397	67641336	-	0.0215424	Cep76	ENSMUSG00000073542	centrosomal protein 76 [Source:MGI Symbol;Acc:MGI:1923401]	gene	overlapping	0	6.95531	5.93386	6.46726	6.33263	6.49327	6.67008	6.97189	6.64872	6.27403	6.56702	6.98174	6.31124	6.63768	6.97597	7.30368	7.30131	7.03892	7.10869	6.16425	6.69235
Spin1	13	51100880	51152546	+	0.0122662	Spin1	ENSMUSG00000021395	spindlin 1 [Source:MGI Symbol;Acc:MGI:109242]	gene	overlapping	0	6.69115	8.28435	8.07053	7.45859	7.9624	7.29722	7.53469	7.70027	7.77457	7.39395	8.56752	8.19679	8.09791	8.34186	7.91641	7.56322	7.53891	7.87438	7.85781	7.82833
1190007F08Rik	4	154020588	154026152	-	0.0013874	1190007F08Rik	ENSMUSG00000078350	RIKEN cDNA 1190007F08 gene [Source:MGI Symbol;Acc:MGI:1916109]	gene	overlapping	0	7.04508	7.00646	6.82866	6.73768	6.61407	6.17145	6.96969	7.34085	6.66436	6.83353	7.92584	6.76901	7.30407	6.89378	7.20188	7.10289	7.66484	6.92353	6.65291	6.8547
Zfp706	15	36997031	37007402	-	0.00579955	Zfp706	ENSMUSG00000062397	zinc finger protein 706 [Source:MGI Symbol;Acc:MGI:1915286]	gene	overlapping	0	8.77782	9.30744	8.9424	8.11125	7.91145	7.96568	8.26808	8.82342	8.43746	8.71588	9.68443	8.73163	8.94193	8.75656	8.82957	8.74829	9.22938	8.95273	8.32795	8.6044
Pdcd6ip	9	113651744	113708259	-	0.0127851	Pdcd6ip	ENSMUSG00000032504	programmed cell death 6 interacting protein [Source:MGI Symbol;Acc:MGI:1333753]	gene	overlapping	0	6.19761	7.02187	6.46462	6.79662	6.0521	5.89348	6.66146	6.54553	6.66595	6.86449	6.98418	6.33837	6.5545	7.31286	7.11369	6.84667	7.1741	6.95725	6.355	6.90499
Uso1	5	92137938	92202794	+	0.000673985	Uso1	ENSMUSG00000029407	USO1 homolog, vesicle docking protein (yeast) [Source:MGI Symbol;Acc:MGI:1929095]	gene	overlapping	0	6.27162	6.84508	6.84901	6.53283	7.08869	6.62281	6.65326	6.91578	6.42437	6.84047	7.33453	7.28544	6.76862	6.52284	6.93203	7.09405	7.38086	7.22859	6.60474	7.11185
Pum2	12	8674134	8752581	+	1.09734e-05	Pum2	ENSMUSG00000020594	pumilio 2 (Drosophila) [Source:MGI Symbol;Acc:MGI:1931751]	gene	overlapping	0	8.48982	8.96721	8.84141	8.44183	8.72195	8.25706	8.67976	9.06745	8.77825	9.14849	9.62677	8.87844	9.02992	9.05484	8.76003	8.99805	9.0685	9.12979	8.91235	9.27492
Casp6	3	129901425	129914103	+	0.0258538	Casp6	ENSMUSG00000027997	caspase 6 [Source:MGI Symbol;Acc:MGI:1312921]	gene	overlapping	0	6.42947	7.13549	7.49593	7.18121	7.41451	6.41048	7.89858	7.47745	6.9001	7.47419	8.22762	7.56894	7.53104	7.68685	7.60071	7.36151	8.00611	7.19601	6.73961	7.32542
Scaf11	15	96411698	96460843	-	0.00439177	Scaf11	ENSMUSG00000033228	SR-related CTD-associated factor 11 [Source:MGI Symbol;Acc:MGI:1919443]	gene	overlapping	0	6.65705	7.41762	7.67187	7.0055	7.64275	6.81975	7.25096	7.94018	7.1748	7.39866	8.07493	7.37203	7.81908	7.37565	7.4822	7.7855	7.82292	7.83487	6.89516	7.92188
Slc25a4	8	46206797	46211284	-	0.0482701	Slc25a4	ENSMUSG00000031633	solute carrier family 25 (mitochondrial carrier, adenine nucleotide translocator), member 4 [Source:MGI Symbol;Acc:MGI:1353495]	gene	overlapping	0	6.69452	7.97061	7.29404	6.29224	7.24028	6.83787	7.90205	7.07047	7.68018	7.64138	8.04376	7.85545	7.09983	7.78198	7.87438	7.41841	8.13789	7.33501	7.39546	7.46816
AC140240.1	18	3471630	3474315	+	0.0135817	AC140240.1	ENSMUSG00000096528	Putative uncharacterized protein [Source:UniProtKB/TrEMBL;Acc:Q3TL09]	gene	overlapping	0	7.93837	8.55482	7.5177	7.86348	8.67134	7.89001	8.46218	8.86398	8.43792	8.29265	9.45045	8.33927	8.6066	8.46332	8.49134	8.38345	8.80396	8.65051	8.18562	8.46956
BC031353	9	74953053	75032468	+	0.0271906	BC031353	ENSMUSG00000034858	cDNA sequence BC031353 [Source:MGI Symbol;Acc:MGI:2387648]	gene	overlapping	0	5.9665	7.15957	7.00404	6.54035	7.20993	6.58577	6.26898	7.03796	6.73725	6.89978	6.88863	6.93701	7.20674	6.3703	7.17944	7.04096	6.95997	7.50422	7.17028	7.51817
Zdhhc3	9	123066160	123113205	-	0.0148879	Zdhhc3	ENSMUSG00000025786	zinc finger, DHHC domain containing 3 [Source:MGI Symbol;Acc:MGI:1926134]	gene	overlapping	0	6.72776	6.43581	7.22254	6.60487	6.89247	6.18849	6.10218	6.14487	6.12942	6.18369	7.17103	6.56205	6.40766	6.63274	6.85959	7.14417	7.18339	6.9447	6.43732	6.69235
Wbscr22	5	135052957	135064959	-	0.00845239	Wbscr22	ENSMUSG00000005378	Williams Beuren syndrome chromosome region 22 [Source:MGI Symbol;Acc:MGI:1913388]	gene	overlapping	0	7.42542	6.97288	7.0714	7.09398	7.24028	6.93446	7.71894	7.35906	6.92819	7.16585	8.1753	7.53572	7.20793	7.54756	7.88609	7.65478	7.74761	6.95447	6.67322	7.29195
Gadd45gip1	8	84831522	84835482	+	0.0462904	Gadd45gip1	ENSMUSG00000033751	growth arrest and DNA-damage-inducible, gamma interacting protein 1 [Source:MGI Symbol;Acc:MGI:1914947]	gene	overlapping	0	6.94969	6.30159	7.19259	6.11226	5.87967	5.37866	6.15737	6.31055	5.66277	6.41734	7.2235	6.55589	6.82372	6.57496	6.62801	6.32796	7.05758	6.50422	6.03142	6.34757
Prmt3	7	49778346	49858265	+	0.048423	Prmt3	ENSMUSG00000030505	protein arginine N-methyltransferase 3 [Source:MGI Symbol;Acc:MGI:1919224]	gene	overlapping	0	6.21647	6.98865	6.55905	6.95351	6.24153	6.49052	6.54508	7.18996	7.12481	7.29518	6.72939	7.10759	6.62356	7.23154	7.35412	7.40596	7.1911	7.6175	6.60696	7.00734
Uba5	9	104046599	104063134	-	0.0265402	Uba5	ENSMUSG00000032557	ubiquitin-like modifier activating enzyme 5 [Source:MGI Symbol;Acc:MGI:1913913]	gene	overlapping	0	6.27612	7.28891	7.297	6.97586	7.2931	6.51549	6.86227	8.17509	7.02304	7.50943	7.751	7.72513	7.44227	7.74247	7.82729	7.07395	7.41151	7.39672	7.15667	7.53157
Rab14	2	35180205	35201120	-	0.0271793	Rab14	ENSMUSG00000026878	RAB14, member RAS oncogene family [Source:MGI Symbol;Acc:MGI:1915615]	gene	overlapping	0	6.82927	8.47471	7.39021	7.10213	7.3763	7.11315	7.21982	7.58263	7.00808	6.78941	7.94722	7.5582	7.88051	8.12803	7.19719	7.53817	7.69874	7.8212	7.37407	7.47996
Kcmf1	6	72841114	72899979	-	0.00141949	Kcmf1	ENSMUSG00000055239	potassium channel modulatory factor 1 [Source:MGI Symbol;Acc:MGI:1921537]	gene	overlapping	0	8.01578	8.46509	8.00676	7.52755	7.60146	7.18637	7.58588	8.14105	7.62404	7.98127	8.88799	7.69536	8.2795	7.81191	8.03956	8.16596	8.37072	8.07901	7.80889	8.14056
Ube2s	7	4808155	4812351	-	0.0230433	Ube2s	ENSMUSG00000060860	ubiquitin-conjugating enzyme E2S [Source:MGI Symbol;Acc:MGI:1925141]	gene	overlapping	0	7.01578	7.5929	6.98394	6.50851	6.78849	6.20533	7.12411	7.44836	6.83093	7.0673	8.13424	7.14905	7.38794	7.20171	7.42612	7.07731	7.72868	7.19365	6.32017	6.8114
Nacc2	2	26055535	26123220	-	0.0357508	Nacc2	ENSMUSG00000026932	nucleus accumbens associated 2, BEN and BTB (POZ) domain containing [Source:MGI Symbol;Acc:MGI:1915241]	gene	overlapping	0	6.6742	7.33721	6.5738	7.0827	7.27245	7.03758	6.867	7.26913	6.02676	6.85937	7.09872	7.04418	7.34015	7.24915	7.41301	7.2193	7.985	7.13717	6.57437	7.07846
Fam134a	1	75142786	75147909	+	0.0368857	Fam134a	ENSMUSG00000049339	family with sequence similarity 134, member A [Source:MGI Symbol;Acc:MGI:2388278]	gene	overlapping	0	7.60611	7.111	7.24421	7.29313	6.76085	6.4616	6.08601	6.97495	6.6322	6.913	7.12764	6.97785	7.3118	6.91967	7.69032	7.61977	7.61074	7.00907	7.06174	7.16097
Eml5	12	98786604	98901484	-	0.0198611	Eml5	ENSMUSG00000051166	echinoderm microtubule associated protein like 5 [Source:MGI Symbol;Acc:MGI:2442513]	gene	overlapping	0	6.66393	7.9489	6.62426	6.43781	6.60243	6.40927	6.54803	6.96201	6.7493	6.81428	7.35537	6.67563	7.16833	7.01766	7.12238	7.177	7.20942	7.48701	6.82235	7.35738
N4bp1	8	86841139	86885258	-	0.030498	N4bp1	ENSMUSG00000031652	NEDD4 binding protein 1 [Source:MGI Symbol;Acc:MGI:2136825]	gene	overlapping	0	6.15426	7.36854	7.81113	7.35241	6.91459	6.98166	7.26539	7.2796	7.02552	7.04045	7.84911	7.16329	7.36901	7.1774	7.2861	7.6351	7.02864	8.05001	7.02644	7.75596
Mrrf	2	36136389	36190647	+	0.0237225	Mrrf	ENSMUSG00000026887	mitochondrial ribosome recycling factor [Source:MGI Symbol;Acc:MGI:1915121]	gene	overlapping	0	5.48107	6.60902	6.16689	5.92967	6.06628	6.29328	6.60586	6.99626	5.91889	6.38686	7.33644	6.40663	6.23953	6.53883	6.67267	6.42107	6.54973	6.74523	5.95489	6.75653
Ddb1	19	10605625	10629813	+	0.014178	Ddb1	ENSMUSG00000024740	damage specific DNA binding protein 1 [Source:MGI Symbol;Acc:MGI:1202384]	gene	overlapping	0	7.58268	7.27978	7.36075	7.24976	7.82232	7.24727	8.06246	7.55704	7.8288	7.52996	8.53301	7.86357	7.72793	7.35953	8.01908	7.93785	8.30053	7.73555	7.11508	7.66646
Fam63a	3	95281345	95296166	+	0.00580264	Fam63a	ENSMUSG00000038712	family with sequence similarity 63, member A [Source:MGI Symbol;Acc:MGI:1922257]	gene	overlapping	0	7.69956	6.79472	7.29255	7.30023	7.28099	7.29525	7.30783	7.11206	7.25409	6.83874	7.39617	7.36149	7.75654	7.73624	7.59894	7.6105	7.8659	7.51086	7.20667	7.18407
Rtn4	11	29692947	29744331	+	0.00683075	Rtn4	ENSMUSG00000020458	reticulon 4 [Source:MGI Symbol;Acc:MGI:1915835]	gene	overlapping	0	7.4555	8.43745	8.18541	8.04197	7.92319	7.46277	8.06761	8.25947	7.91689	7.463	9.07322	8.14342	8.29518	8.50748	7.92424	7.98406	8.52557	7.86627	7.76623	7.97582
Herc4	10	63243797	63317881	+	0.0444961	Herc4	ENSMUSG00000020064	hect domain and RLD 4 [Source:MGI Symbol;Acc:MGI:1914595]	gene	overlapping	0	6.77624	8.03494	7.99676	7.46335	7.05352	7.42912	6.66691	7.6133	7.02552	7.72996	8.18909	7.58941	7.44529	7.55229	6.99155	7.96357	7.77555	7.96071	7.8214	7.87954
Mkrn1	6	39397804	39420462	-	0.00154546	Mkrn1	ENSMUSG00000029922	makorin, ring finger protein, 1 [Source:MGI Symbol;Acc:MGI:1859353]	gene	overlapping	0	8.92553	9.29888	9.02117	8.59046	8.11827	8.08461	8.60302	9.15106	8.7694	8.97931	9.2983	8.99102	9.18105	9.11128	9.31808	9.21038	9.47977	8.76202	8.58851	8.86453
Zc3h14	12	98746968	98787774	+	0.00482811	Zc3h14	ENSMUSG00000021012	zinc finger CCCH type containing 14 [Source:MGI Symbol;Acc:MGI:1919824]	gene	overlapping	0	7.90097	8.74784	7.7035	7.6871	7.72015	7.5847	7.77925	8.42183	8.15512	8.1295	8.36288	7.97843	8.2795	7.99985	8.30804	8.68969	8.52252	8.52076	8.0405	8.35059
Lig3	11	82781108	82804274	+	0.0101539	Lig3	ENSMUSG00000020697	ligase III, DNA, ATP-dependent [Source:MGI Symbol;Acc:MGI:109152]	gene	overlapping	0	7.25803	7.75049	8.03367	7.46572	8.05921	7.3737	7.52723	8.01622	8.09915	8.00075	8.27114	7.9529	7.57483	7.91355	7.62975	8.28537	8.57114	8.29437	7.88098	8.12959
Dnajc13	9	104151597	104262930	-	0.0466616	Dnajc13	ENSMUSG00000032560	DnaJ (Hsp40) homolog, subfamily C, member 13 [Source:MGI Symbol;Acc:MGI:2676368]	gene	overlapping	0	6.2671	7.90328	6.99676	7.06717	6.64275	6.69613	7.22167	7.07649	7.30191	7.15477	7.78072	7.23339	6.87977	7.04479	7.21356	7.82879	7.82093	7.24688	6.8997	7.45908
Fam101b	11	76019194	76027782	-	0.00485027	Fam101b	ENSMUSG00000020846	family with sequence similarity 101, member B [Source:MGI Symbol;Acc:MGI:1923816]	gene	overlapping	0	7.9241	8.26876	7.87007	7.91065	7.54382	7.20603	7.49392	7.90794	8.01683	8.10883	8.30659	8.18039	8.01173	7.77187	8.32105	8.41442	8.46586	8.14389	7.44293	8.06884
Ctnnal1	4	56810935	56865188	-	0.0228945	Ctnnal1	ENSMUSG00000038816	catenin (cadherin associated protein), alpha-like 1 [Source:MGI Symbol;Acc:MGI:1859649]	gene	overlapping	0	7.82313	7.38565	7.22876	7.0055	6.91459	6.73531	7.20866	7.79938	7.46329	7.53958	7.68668	6.81739	7.39731	7.86489	7.93133	7.72878	7.89637	7.4793	7.2436	7.92747
Dot1l	10	80755206	80795461	+	0.0271906	Dot1l	ENSMUSG00000061589	DOT1-like, histone H3 methyltransferase (S. cerevisiae) [Source:MGI Symbol;Acc:MGI:2143886]	gene	overlapping	0	6.2671	6.94544	6.72898	6.59335	6.48696	6.92517	6.72548	7.41394	7.39878	6.84909	7.11437	7.21594	7.53482	6.83152	7.23548	7.46289	7.3564	6.86108	6.75373	6.98218
Cenph	13	100759674	100775899	-	0.00541362	Cenph	ENSMUSG00000045273	centromere protein H [Source:MGI Symbol;Acc:MGI:1349448]	gene	overlapping	0	5.71787	5.95694	6.50622	5.91586	5.46142	6.04929	6.01948	6.41868	5.91355	6.21071	6.89123	5.83019	6.25336	6.45703	6.44208	6.44908	6.1772	5.93062	6.08347	6.44144
Rap1a	3	105727267	105801330	-	0.0453078	Rap1a	ENSMUSG00000068798	RAS-related protein-1a [Source:MGI Symbol;Acc:MGI:97852]	gene	overlapping	0	8.43249	8.63787	7.56521	7.41264	7.51308	7.13821	8.03535	7.99202	7.69037	7.78762	9.04783	8.11494	7.96347	8.1891	7.73149	7.92107	8.31893	8.12362	7.67693	8.0647
Eif1ax	X	159372178	159389928	+	0.0359518	Eif1ax	ENSMUSG00000067194	eukaryotic translation initiation factor 1A, X-linked [Source:MGI Symbol;Acc:MGI:1913485]	gene	overlapping	0	8.17971	7.78959	8.61181	7.66594	7.53671	7.42013	7.58301	7.9023	7.44396	7.38568	8.91184	7.70582	8.27159	7.87122	7.56835	7.46374	8.23274	8.12114	8.04952	7.97729
Rpp21	17	36255645	36258069	-	0.042457	Rpp21	ENSMUSG00000024446	ribonuclease P 21 subunit (human) [Source:MGI Symbol;Acc:MGI:1914926]	gene	overlapping	0	5.28954	6.05005	5.66385	5.44744	5.23903	5.65688	5.31478	5.88641	5.40546	5.8019	5.76098	6.01645	5.97046	6.25884	5.99696	5.04326	6.12025	5.98339	5.85735	5.27612
Rffl	11	82802449	82871210	-	0.0355442	Rffl	ENSMUSG00000020696	ring finger and FYVE like domain containing protein [Source:MGI Symbol;Acc:MGI:1914588]	gene	overlapping	0	7.38848	7.73455	8.17819	8.00984	7.98871	7.59911	7.82135	7.73365	7.99549	7.94714	8.21316	7.91675	7.53104	7.85087	7.65137	8.33407	8.9067	8.26438	7.82474	8.20555
Vps4a	8	107031222	107045755	+	0.0287976	Vps4a	ENSMUSG00000031913	vacuolar protein sorting 4a (yeast) [Source:MGI Symbol;Acc:MGI:1890520]	gene	overlapping	0	6.67761	7.50008	7.07659	6.95126	7.08591	6.58898	7.28145	7.00889	7.22311	6.45624	7.74527	7.16025	6.85278	7.2276	7.44604	7.39069	7.72657	7.45787	6.34837	6.9446
Srsf6	2	162931528	162937121	+	0.0489769	Srsf6	ENSMUSG00000016921	serine/arginine-rich splicing factor 6 [Source:MGI Symbol;Acc:MGI:1915246]	gene	overlapping	0	8.01981	8.87326	8.84445	7.86587	8.05637	7.65841	6.87408	8.59386	8.05918	8.17548	9.00111	8.25681	8.39055	8.26221	8.49803	8.30227	8.63917	8.47203	8.13795	8.5309
Slc6a8	X	73673150	73682502	+	0.0155377	Slc6a8	ENSMUSG00000019558	solute carrier family 6 (neurotransmitter transporter, creatine), member 8 [Source:MGI Symbol;Acc:MGI:2147834]	gene	overlapping	0	8.72612	7.65067	8.61121	8.16671	8.23212	8.50391	8.66691	8.54046	8.04825	8.13727	8.71847	8.39806	8.88903	8.78433	8.27945	8.41398	8.98456	8.85885	8.42445	8.29589
Avl9	6	56714927	56761911	+	0.0191954	Avl9	ENSMUSG00000029787	AVL9 homolog (S. cerevisiase) [Source:MGI Symbol;Acc:MGI:1926187]	gene	overlapping	0	8.09816	7.62496	7.90353	7.79348	7.68381	7.08233	7.65737	7.85059	7.3863	7.30021	7.90928	7.7072	7.7105	7.51397	7.64965	7.88242	8.15768	8.6419	7.86666	7.87113
Tmem120a	5	135735485	135744271	-	0.00779743	Tmem120a	ENSMUSG00000039886	transmembrane protein 120A [Source:MGI Symbol;Acc:MGI:2686991]	gene	overlapping	0	7.90824	7.76495	7.62071	7.14616	7.5848	7.06629	7.77169	7.49252	7.19696	7.51052	8.1996	7.5697	7.86559	7.66443	8.11119	7.78	8.19799	7.79191	6.94788	7.28722
Dut	2	125247190	125258608	+	0.0103738	Dut	ENSMUSG00000027203	deoxyuridine triphosphatase [Source:MGI Symbol;Acc:MGI:1346051]	gene	overlapping	0	6.52712	7.36336	6.8869	6.22665	6.60048	6.11017	6.69382	6.69377	6.50474	6.89312	7.70893	6.95816	7.01849	6.82109	7.12114	6.96296	6.85139	6.7127	6.45224	6.43432
2810474O19Rik	6	149309414	149335658	+	0.0386328	2810474O19Rik	ENSMUSG00000032712	RIKEN cDNA 2810474O19 gene [Source:MGI Symbol;Acc:MGI:1914496]	gene	overlapping	0	7.84602	8.0934	7.23341	7.34814	7.49746	7.2109	7.30608	7.95658	7.41021	7.43806	8.29977	7.49127	7.64207	7.83929	6.88901	7.99835	7.79185	7.98203	7.53577	8.26493
Rb1cc1	1	6206197	6276648	+	0.0418785	Rb1cc1	ENSMUSG00000025907	RB1-inducible coiled-coil 1 [Source:MGI Symbol;Acc:MGI:1341850]	gene	overlapping	0	8.53934	9.777	9.30144	8.68337	9.37516	8.7847	9.46882	9.75412	9.27768	9.1693	10.3966	9.0083	9.17501	9.3295	9.01007	9.34693	9.73528	9.67415	9.25499	9.65365
Lrrc47	4	154011731	154021513	+	0.00381261	Lrrc47	ENSMUSG00000029028	leucine rich repeat containing 47 [Source:MGI Symbol;Acc:MGI:1920196]	gene	overlapping	0	7.47521	7.33897	7.45536	7.18505	7.07473	6.82703	7.37256	7.50298	7.13747	6.93747	8.22967	7.14086	7.51582	7.29507	7.72499	7.17281	7.87166	7.14572	6.99706	7.26252
Cenpn	8	116921740	116941503	+	0.00608797	Cenpn	ENSMUSG00000031756	centromere protein N [Source:MGI Symbol;Acc:MGI:1919405]	gene	overlapping	0	6.82927	7.065	7.17013	6.97808	7.33002	6.8051	7.16509	7.49552	6.94138	6.85595	7.43407	6.97324	7.43724	7.05372	7.53059	7.38345	7.82787	7.29052	6.60696	7.15492
Ubfd1	7	122067175	122082194	+	0.00289578	Ubfd1	ENSMUSG00000030870	ubiquitin family domain containing 1 [Source:MGI Symbol;Acc:MGI:107301]	gene	overlapping	0	7.46932	8.43252	8.24421	7.86108	7.81562	7.44516	7.70578	8.30629	7.41116	8.23196	8.29879	8.24825	8.26989	8.15734	8.24972	7.96114	8.04574	8.26101	7.96229	8.11986
Pfn1	11	70651850	70654644	-	0.0164073	Pfn1	ENSMUSG00000018293	profilin 1 [Source:MGI Symbol;Acc:MGI:97549]	gene	overlapping	0	7.54401	6.86962	6.96542	6.44584	6.54686	6.33979	7.01308	6.71191	6.41116	6.6699	7.55529	7.00294	6.97881	6.85981	7.11244	6.91103	7.04743	7.0474	6.52346	6.91116
Arpc5l	2	39008076	39015877	+	0.0285593	Arpc5l	ENSMUSG00000026755	actin related protein 2/3 complex, subunit 5-like [Source:MGI Symbol;Acc:MGI:1921442]	gene	overlapping	0	7.15181	7.72113	7.19578	6.86886	6.57888	6.63943	6.95419	7.18996	6.88925	7.23854	7.93594	7.34642	7.50815	7.30727	7.58911	6.69701	7.24093	7.19954	6.80889	6.89673
Vdac2	14	21831269	21845879	+	0.0201712	Vdac2	ENSMUSG00000021771	voltage-dependent anion channel 2 [Source:MGI Symbol;Acc:MGI:106915]	gene	overlapping	0	7.76187	7.93734	7.85506	7.03347	7.19064	7.13968	7.62557	7.62155	7.34918	7.913	8.34499	7.57883	7.88274	7.79536	7.86553	7.72592	8.25643	7.19836	7.31269	7.51412
Adipor1	1	134415378	134433351	+	0.0377235	Adipor1	ENSMUSG00000026457	adiponectin receptor 1 [Source:MGI Symbol;Acc:MGI:1919924]	gene	overlapping	0	7.07381	8.06287	7.5689	7.45859	7.27734	7.14623	6.88347	7.54263	7.27924	7.51594	7.66711	7.49288	7.41177	7.35231	7.94819	7.93103	7.99207	7.24915	7.10881	7.79427
l7Rn6	7	89917529	89941199	-	0.0481838	l7Rn6	ENSMUSG00000062797	lethal, Chr 7, Rinchik 6 [Source:MGI Symbol;Acc:MGI:96738]	gene	overlapping	0	7.33339	7.12941	7.05748	7.0734	6.59658	6.74877	6.72286	6.86108	6.67546	7.23196	7.98661	6.89132	7.14997	7.21869	6.83713	7.19262	7.36732	6.73068	6.6922	7.15579
4933424B01Rik	6	146549632	146577835	-	0.0395294	4933424B01Rik	ENSMUSG00000040250	RIKEN cDNA 4933424B01 gene [Source:MGI Symbol;Acc:MGI:1918427]	gene	overlapping	0	7.24431	8.35817	8.0714	7.73768	7.76954	7.47092	7.92949	7.4044	7.3834	7.39631	8.44295	7.56358	7.69115	7.84766	7.93203	8.02593	8.04403	8.21588	7.23212	7.87849
Sltm	9	70542920	70592237	+	0.00465787	Sltm	ENSMUSG00000032212	SAFB-like, transcription modulator [Source:MGI Symbol;Acc:MGI:1913910]	gene	overlapping	0	8.08283	8.58551	8.36358	8.40071	8.3899	7.88523	8.54582	8.61261	8.37711	8.14149	9.26114	8.36633	8.77862	8.57496	8.60913	8.41885	8.13948	8.60559	8.15667	8.27173
Tsnax	8	125012997	125034192	+	0.0288535	Tsnax	ENSMUSG00000056820	translin-associated factor X [Source:MGI Symbol;Acc:MGI:1855672]	gene	overlapping	0	7.04772	6.96151	7.02744	6.51616	6.44414	6.27213	6.75389	6.8353	6.30701	6.86958	7.06231	7.19432	6.49948	6.54042	6.78958	6.98824	6.92529	7.20539	6.45841	7.32619
Cecr2	6	120666369	120771190	+	0.00751173	Cecr2	ENSMUSG00000071226	cat eye syndrome chromosome region, candidate 2 homolog (human) [Source:MGI Symbol;Acc:MGI:1923799]	gene	overlapping	0	8.16764	9.34511	9.04077	8.84539	8.81813	8.54445	8.76599	9.19964	8.38582	8.75311	9.24346	8.91795	9.32822	8.85022	8.87143	9.11113	9.01525	9.15725	8.51044	9.07937
Appbp2	11	85187262	85235130	-	0.0269107	Appbp2	ENSMUSG00000018481	amyloid beta precursor protein (cytoplasmic tail) binding protein 2 [Source:MGI Symbol;Acc:MGI:1914134]	gene	overlapping	0	7.43954	8.65279	8.42383	8.02116	8.425	7.97144	8.1092	8.64467	8.27716	8.2392	9.00291	8.18039	8.08315	8.72999	8.54498	8.40997	8.06179	8.53664	8.33836	8.39453
Psme3	11	101316213	101323537	+	0.0245868	Psme3	ENSMUSG00000078652	proteaseome (prosome, macropain) 28 subunit, 3 [Source:MGI Symbol;Acc:MGI:1096366]	gene	overlapping	0	8.1358	8.02624	7.87106	7.78844	7.86676	7.58898	7.70048	7.89665	7.63382	7.68731	8.10209	8.01813	7.56839	8.00101	8.30477	8.36611	8.40358	7.70858	7.32288	7.91832
Rdbp	17	34850391	34856372	+	0.0239722	Rdbp	ENSMUSG00000024369	RD RNA-binding protein [Source:MGI Symbol;Acc:MGI:102744]	gene	overlapping	0	7.51574	7.50948	7.6604	7.05882	7.24528	6.93025	7.06761	7.31395	7.09797	7.23985	7.52216	7.36765	7.6012	7.4264	7.66504	7.55519	7.80094	7.58642	6.72739	6.88738
Hectd1	12	51743722	51829536	-	0.038556	Hectd1	ENSMUSG00000035247	HECT domain containing 1 [Source:MGI Symbol;Acc:MGI:2384768]	gene	overlapping	0	8.17007	8.42094	8.36429	8.16816	8.26078	7.6118	7.64914	8.58404	7.74855	8.32577	8.908	7.8454	8.57161	7.96061	8.20715	8.33548	8.57114	8.18716	8.00551	8.33807
Smc3	19	53600398	53645833	+	0.0455528	Smc3	ENSMUSG00000024974	structural maintenance of chromosomes 3 [Source:MGI Symbol;Acc:MGI:1339795]	gene	overlapping	0	7.53089	8.22664	8.1918	7.59263	8.12099	7.22198	7.91584	8.308	7.48686	7.78402	8.54048	7.70651	8.06627	7.85917	7.45689	8.17648	8.10565	7.83487	8.00129	8.18322
2015-09-01	3	144570304	144597680	+	0.0150762	2015-09-01	ENSMUSG00000037072	selenoprotein [Source:MGI Symbol;Acc:MGI:1927947]	gene	overlapping	0	7.32255	7.38735	7.56398	7.23223	7.23275	6.93446	7.26718	7.18254	7.32523	7.6384	7.81395	7.45949	7.15489	7.45618	7.70197	7.52095	7.33709	7.61575	6.92399	7.38496
Cops5	1	10024602	10038127	-	0.0334977	Cops5	ENSMUSG00000025917	COP9 (constitutive photomorphogenic) homolog, subunit 5 (Arabidopsis thaliana) [Source:MGI Symbol;Acc:MGI:1349415]	gene	overlapping	0	7.42339	7.7103	7.8869	7.43217	7.52031	7.09067	7.95419	7.70546	7.71822	7.69499	8.30367	7.69815	7.53293	7.83022	7.72172	7.73163	8.25349	7.4793	7.14371	7.58589
Ywhah	5	33018816	33027966	+	0.0467477	Ywhah	ENSMUSG00000018965	tyrosine 3-monooxygenase/tryptophan 5-monooxygenase activation protein, eta polypeptide [Source:MGI Symbol;Acc:MGI:109194]	gene	overlapping	0	7.31163	8.32218	7.75832	7.26618	7.19322	6.97921	7.51067	7.59804	7.66992	7.76319	7.97319	7.64698	7.61287	7.80399	7.64104	7.72305	7.87262	7.88317	7.33635	7.56193
Actr3	1	125392905	125435727	-	0.0145775	Actr3	ENSMUSG00000026341	ARP3 actin-related protein 3 homolog (yeast) [Source:MGI Symbol;Acc:MGI:1921367]	gene	overlapping	0	8.0751	8.20076	8.05222	7.74225	8.21121	7.65585	8.01415	7.85992	7.72891	8.03063	8.43763	7.9663	7.92367	8.12273	7.76678	8.18639	8.42986	7.88973	7.7068	8.16957
Trip12	1	84721189	84839304	-	0.0477656	Trip12	ENSMUSG00000026219	thyroid hormone receptor interactor 12 [Source:MGI Symbol;Acc:MGI:1309481]	gene	overlapping	0	8.66908	9.03765	9.17739	8.39076	8.5956	8.20916	8.83894	8.80904	8.60511	8.62842	9.53218	8.54273	8.53293	8.82599	8.40489	8.85749	9.11499	8.63541	8.61831	8.7312
Als2cr11	1	58997123	59003443	-	0.0489769	Als2cr11	ENSMUSG00000047383	amyotrophic lateral sclerosis 2 (juvenile) chromosome region, candidate 11 (human) [Source:MGI Symbol;Acc:MGI:1920713]	gene	overlapping	0	-2.20232	1.46509	1.17658	-3.52155	3.25893	0.583626	2.56854	1.38998	0.424368	2.09076	-2.37971	-3.46647	-3.19556	-3.43813	-3.21574	-1.6664	-2.83589	4.43611	-3.88711	-3.69925
Espl1	15	102296293	102324356	+	0.0180456	Espl1	ENSMUSG00000058290	extra spindle poles-like 1 (S. cerevisiae) [Source:MGI Symbol;Acc:MGI:2146156]	gene	overlapping	0	8.18211	8.1233	8.54789	8.03773	8.24403	8.00309	8.17563	8.40679	8.23333	8.0842	8.02496	7.33748	7.6039	7.76916	8.13287	7.85455	7.64703	7.66078	7.59356	7.72071
Sf3b2	19	5273923	5295455	-	0.0483283	Sf3b2	ENSMUSG00000024853	splicing factor 3b, subunit 2 [Source:MGI Symbol;Acc:MGI:2441856]	gene	overlapping	0	9.01173	8.58551	8.78497	8.19461	8.52905	8.28703	8.69049	8.73681	8.41683	8.38686	8.70746	7.78488	7.91572	7.81256	8.05066	8.25891	8.57938	7.81815	7.75624	7.84292
Rrm1	7	102441695	102469771	+	0.0148611	Rrm1	ENSMUSG00000030978	ribonucleotide reductase M1 [Source:MGI Symbol;Acc:MGI:98180]	gene	overlapping	0	8.24201	8.45377	8.29181	7.98966	8.38255	8.15926	8.54655	8.67803	7.85761	8.09439	8.35255	7.72719	7.48001	7.45281	7.64363	7.84206	8.18571	7.60071	7.46579	7.71367
Ipo4	14	55625400	55637895	-	0.0411257	Ipo4	ENSMUSG00000002319	importin 4 [Source:MGI Symbol;Acc:MGI:1923001]	gene	overlapping	0	8.6742	8.62279	8.74046	8.08373	8.46357	8.24998	8.75708	8.82461	8.53246	8.38686	8.70155	7.52945	7.61555	7.88192	7.84316	8.1983	8.43506	8.1518	7.87268	7.69652
Slc25a44	3	88410498	88425139	-	0.00963754	Slc25a44	ENSMUSG00000050144	solute carrier family 25, member 44 [Source:MGI Symbol;Acc:MGI:2444391]	gene	overlapping	0	8.70791	8.3831	8.59383	8.06196	8.55141	7.90899	8.35412	8.67605	8.09974	8.02911	8.19436	7.83655	8.03526	7.70469	7.83789	7.76684	8.05927	7.71188	7.70939	7.48342
Nop56	2	130274430	130279313	+	0.0465114	Nop56	ENSMUSG00000027405	NOP56 ribonucleoprotein homolog (yeast) [Source:MGI Symbol;Acc:MGI:1914384]	gene	overlapping	0	9.40604	8.89613	9.12703	8.43902	8.96997	8.39863	9.14133	9.17509	8.66198	8.72528	8.99267	8.23916	7.93587	8.48578	8.55786	8.36886	8.61704	8.34194	8.19304	8.09796
Med4	14	73510049	73518545	+	0.0191954	Med4	ENSMUSG00000022109	mediator of RNA polymerase II transcription, subunit 4 homolog (yeast) [Source:MGI Symbol;Acc:MGI:1914631]	gene	overlapping	0	7.45152	8.11409	8.18941	7.53434	7.59658	7.18354	8.07275	8.06342	7.50918	7.69785	7.67918	6.94292	7.34769	7.27612	7.42411	7.10949	7.27031	7.40183	6.93731	6.86849
Tsr1	11	74898071	74909342	+	0.0365194	Tsr1	ENSMUSG00000038335	TSR1, 20S rRNA accumulation, homolog (yeast) [Source:MGI Symbol;Acc:MGI:2144566]	gene	overlapping	0	8.45451	8.87205	9.18301	8.0174	8.91812	8.31995	8.9872	9.21016	8.43653	8.59958	8.90093	8.0524	7.94371	8.08674	8.27389	8.27073	8.2579	7.9745	8.07827	7.99771
Nudc	4	133532542	133545996	-	0.0456115	Nudc	ENSMUSG00000028851	nuclear distribution gene C homolog (Aspergillus) [Source:MGI Symbol;Acc:MGI:106014]	gene	overlapping	0	8.26823	7.71708	8.34507	7.47752	7.53874	7.25403	8.17658	8.13145	7.81454	7.86278	7.82622	6.94056	7.29518	7.1485	7.57017	7.34669	7.63013	7.4231	7.17853	7.02829
Syf2	4	134930898	134937548	+	0.0342974	Syf2	ENSMUSG00000028821	SYF2 homolog, RNA splicing factor (S. cerevisiae) [Source:MGI Symbol;Acc:MGI:1915842]	gene	overlapping	0	8.29065	8.44237	8.22098	7.58538	7.7756	7.24591	8.38995	8.33835	7.81954	7.88476	8.03321	7.11807	7.59579	7.4435	7.62627	7.49431	7.49478	7.52029	7.19267	7.35135
Timm44	8	4259731	4275913	-	0.0149411	Timm44	ENSMUSG00000002949	translocase of inner mitochondrial membrane 44 [Source:MGI Symbol;Acc:MGI:1343262]	gene	overlapping	0	7.82159	8.23422	8.27612	7.44584	7.59462	7.56145	8.07479	7.89551	7.7694	7.52888	7.60043	6.91194	7.02791	7.03355	7.4381	7.31088	7.6324	7.49085	7.20005	7.24147
Tacc3	5	33658128	33678995	+	0.0471609	Tacc3	ENSMUSG00000037313	transforming, acidic coiled-coil containing protein 3 [Source:MGI Symbol;Acc:MGI:1341163]	gene	overlapping	0	8.49851	8.09132	8.76047	8.01524	8.24963	7.91923	8.40632	7.58825	8.03846	7.84047	8.19436	7.39892	7.7533	7.59499	7.64363	7.65628	7.72763	7.26157	7.53927	7.36264
Zmiz1	14	25459185	25666743	+	0.048017	Zmiz1	ENSMUSG00000007817	zinc finger, MIZ-type containing 1 [Source:MGI Symbol;Acc:MGI:3040693]	gene	overlapping	0	8.93482	8.86047	8.83938	8.17446	8.79745	8.07395	8.90205	8.48576	8.17312	8.23657	8.48568	7.61034	7.88644	7.64904	8.20598	8.27758	8.19723	8.24631	7.75724	7.8059
Dnajb11	16	22857845	22879634	+	0.0314452	Dnajb11	ENSMUSG00000004460	DnaJ (Hsp40) homolog, subfamily B, member 11 [Source:MGI Symbol;Acc:MGI:1915088]	gene	overlapping	0	8.09307	8.36595	8.46066	7.83136	8.11418	7.44338	8.14084	8.34085	7.73574	7.65325	7.57157	7.42784	7.34446	7.05372	7.76202	7.8493	7.64927	7.41807	7.4479	7.38349
Imp4	1	34439851	34445736	+	0.0237734	Imp4	ENSMUSG00000026127	IMP4, U3 small nucleolar ribonucleoprotein, homolog (yeast) [Source:MGI Symbol;Acc:MGI:106572]	gene	overlapping	0	8.50524	8.30968	8.53978	7.89725	8.35566	7.62176	8.58085	8.54841	7.98279	8.03819	8.3393	7.52788	7.59669	7.7195	7.91997	7.71009	8.06598	7.19483	7.35169	7.40476
Tiprl	1	165214922	165236943	-	0.0261581	Tiprl	ENSMUSG00000040843	TIP41, TOR signalling pathway regulator-like (S. cerevisiae) [Source:MGI Symbol;Acc:MGI:1915087]	gene	overlapping	0	8.20472	8.13144	8.39782	7.7897	8.04996	7.49794	8.26808	8.34252	7.69271	7.98362	8.13094	7.62217	7.49754	7.46039	7.96279	7.26729	7.10402	7.36043	7.11038	7.22011
Cebpz	17	78919006	78937070	-	0.00430683	Cebpz	ENSMUSG00000024081	CCAAT/enhancer binding protein zeta [Source:MGI Symbol;Acc:MGI:109386]	gene	overlapping	0	8.24431	8.76168	8.88443	7.99131	8.61358	8.12131	8.73975	8.66544	8.06461	8.28122	7.97931	7.90772	7.8768	7.76916	7.94049	8.05925	7.97254	7.98271	7.81756	7.85576
Csnk1e	15	79417856	79443919	-	0.0317487	Csnk1e	ENSMUSG00000022433	casein kinase 1, epsilon [Source:MGI Symbol;Acc:MGI:1351660]	gene	overlapping	0	9.70583	9.25811	9.53382	9.05829	9.39666	8.87255	9.57071	9.32325	8.99232	8.8927	9.39891	8.5582	9.00084	8.60755	8.83071	8.66676	8.11134	8.72743	8.41082	8.59486
Dhx30	9	110084320	110117830	-	0.036657	Dhx30	ENSMUSG00000032480	DEAH (Asp-Glu-Ala-His) box polypeptide 30 [Source:MGI Symbol;Acc:MGI:1920081]	gene	overlapping	0	7.47716	7.94429	8.33285	7.46572	7.13654	7.8455	7.77925	7.9247	7.63707	7.6562	7.39251	7.16228	7.27386	7.04479	7.13594	7.40328	6.82589	7.35095	7.20153	7.04053
Ulk1	5	110784488	110810097	-	0.00146128	Ulk1	ENSMUSG00000029512	Unc-51 like kinase 1 (C. elegans) [Source:MGI Symbol;Acc:MGI:1270126]	gene	overlapping	0	9.14383	9.00812	9.39125	8.76745	9.15988	8.62124	9.07479	9.48463	9.08615	8.98088	9.11381	8.17136	8.4498	8.06426	8.61575	8.74758	8.52069	8.50184	8.38286	8.40221
Kdm2b	5	122870668	123015080	-	0.02064	Kdm2b	ENSMUSG00000029475	lysine (K)-specific demethylase 2B [Source:MGI Symbol;Acc:MGI:1354737]	gene	overlapping	0	8.45451	8.21711	8.69566	7.66181	8.07753	7.67664	8.32256	8.65945	8.30242	8.29581	8.34878	7.38857	7.54141	7.64535	7.31131	7.73874	7.69658	7.74844	7.70212	7.65487
BC055324	1	163945993	163994796	-	0.0340606	BC055324	ENSMUSG00000041406	cDNA sequence BC055324 [Source:MGI Symbol;Acc:MGI:3590554]	gene	overlapping	0	8.30614	8.13549	8.06184	7.92565	7.85292	7.67159	8.04688	8.52881	7.7694	7.82656	8.14624	7.14188	7.45928	7.38895	7.5747	7.48335	7.92806	6.58012	7.22272	7.12075
Hexb	13	97176332	97198357	-	0.00695373	Hexb	ENSMUSG00000021665	hexosaminidase B [Source:MGI Symbol;Acc:MGI:96074]	gene	overlapping	0	8.59174	8.33369	8.86108	8.15451	8.19387	7.76401	8.58588	8.65006	8.29627	8.35815	7.83569	7.62804	7.56931	8.00562	7.92353	8.06379	7.85527	7.71845	7.8338	7.77974
Pfdn2	1	171345670	171359254	+	0.0423057	Pfdn2	ENSMUSG00000006412	prefoldin 2 [Source:MGI Symbol;Acc:MGI:1276111]	gene	overlapping	0	6.85357	6.69665	7.20685	6.55081	6.80042	6.38113	7.42972	6.91802	6.5605	6.6699	6.64881	6.22663	6.50719	6.33958	6.48123	6.37435	6.0876	5.46374	6.06093	6.02829
Ranbp3	17	56673225	56711769	+	0.0483283	Ranbp3	ENSMUSG00000002372	RAN binding protein 3 [Source:MGI Symbol;Acc:MGI:1919060]	gene	overlapping	0	8.54027	8.12126	8.4427	7.98746	8.63182	8.06398	8.89279	8.34501	8.06039	7.91464	8.40438	7.22856	7.69454	8.04815	7.99291	7.16438	7.66484	7.78645	7.45718	7.54749
Fbl	7	28169748	28179269	+	0.0488667	Fbl	ENSMUSG00000046865	fibrillarin [Source:MGI Symbol;Acc:MGI:95486]	gene	overlapping	0	8.48009	7.73455	8.01578	7.35753	7.67643	7.12205	8.21704	8.01622	7.41966	7.5449	7.83569	7.09386	7.202	7.01194	7.48123	7.19365	7.43894	7.10619	6.77565	6.76903
Prosc	8	27042555	27056131	+	0.00767064	Prosc	ENSMUSG00000031485	proline synthetase co-transcribed [Source:MGI Symbol;Acc:MGI:1891207]	gene	overlapping	0	8.94121	9.05273	9.21668	8.3554	8.89644	8.23228	8.81033	9.04973	8.1346	8.48142	8.62872	8.24968	8.35198	8.03411	8.17825	8.25742	7.97878	7.9745	8.01852	7.88686
Nars	18	64499665	64516557	-	0.0191954	Nars	ENSMUSG00000024587	asparaginyl-tRNA synthetase [Source:MGI Symbol;Acc:MGI:1917473]	gene	overlapping	0	8.69704	8.70076	8.63132	8.21964	8.4641	7.97799	8.68446	8.86224	8.24401	8.26585	8.37406	7.79732	7.49948	7.83864	8.2182	8.02302	8.38959	7.12486	7.62244	7.72246
Dcaf13	15	39112874	39146856	+	0.0458763	Dcaf13	ENSMUSG00000022300	DDB1 and CUL4 associated factor 13 [Source:MGI Symbol;Acc:MGI:2684929]	gene	overlapping	0	9.08732	8.48666	8.59805	7.94447	8.11554	7.58094	8.75645	8.68526	8.11087	8.33378	8.29389	7.7469	7.62356	7.54992	8.05196	7.87792	8.19952	7.70445	7.5264	7.57881
Parp1	1	180568955	180601253	+	0.0105089	Parp1	ENSMUSG00000026496	poly (ADP-ribose) polymerase family, member 1 [Source:MGI Symbol;Acc:MGI:1340806]	gene	overlapping	0	9.40809	8.68633	9.08647	8.35881	8.80127	8.43478	9.02585	8.96255	8.64394	8.61635	8.79674	7.92692	8.05513	8.08946	8.39262	8.44561	8.57055	8.07005	7.94085	7.83159
Mcm6	1	128331591	128359656	-	0.0209626	Mcm6	ENSMUSG00000026355	minichromosome maintenance deficient 6 (MIS5 homolog, S. pombe) (S. cerevisiae) [Source:MGI Symbol;Acc:MGI:1298227]	gene	overlapping	0	9.17006	8.50479	9.181	8.37487	8.87605	8.30081	8.91469	8.83234	8.44904	8.51594	8.74599	7.74217	7.915	7.91048	7.95308	8.38617	8.63466	8.0474	8.00467	7.77749
Rnmt	18	68300355	68324852	+	0.00101738	Rnmt	ENSMUSG00000009535	RNA (guanine-7-) methyltransferase [Source:MGI Symbol;Acc:MGI:1915147]	gene	overlapping	0	8.84147	8.69871	8.64244	8.06509	8.37288	7.88218	8.6703	8.85351	8.20627	8.25615	8.26515	7.82316	7.76219	7.68254	7.89844	7.85258	7.95093	8.01442	7.62409	7.93556
Wdr3	3	100138180	100162407	-	0.0186683	Wdr3	ENSMUSG00000033285	WD repeat domain 3 [Source:MGI Symbol;Acc:MGI:2443143]	gene	overlapping	0	8.66822	8.41262	8.86658	8.07444	8.47477	7.92008	8.59805	8.79269	7.82311	8.14219	8.59963	7.51684	7.8558	7.30353	7.867	8.00012	7.88976	7.63671	7.68221	7.47304
Mcm10	2	4989714	5012791	-	0.0418785	Mcm10	ENSMUSG00000026669	minichromosome maintenance deficient 10 (S. cerevisiae) [Source:MGI Symbol;Acc:MGI:1917274]	gene	overlapping	0	8.56255	8.10068	8.5404	7.49774	8.5848	8.10382	8.45904	8.32325	7.94597	7.77319	7.61778	7.62658	7.5489	7.84316	7.92069	7.66228	7.70736	7.6341	7.55836	7.11809
Hspa9	18	34937414	34954357	-	0.0162451	Hspa9	ENSMUSG00000024359	heat shock protein 9 [Source:MGI Symbol;Acc:MGI:96245]	gene	overlapping	0	9.47031	9.24081	9.46429	8.5441	8.98199	8.42133	9.36211	9.19458	8.83128	8.78717	9.00711	8.30987	8.12135	8.30024	8.48509	8.67716	8.9482	8.19601	8.12015	8.24595
Dhx15	5	52150209	52190519	-	0.0136498	Dhx15	ENSMUSG00000029169	DEAH (Asp-Glu-Ala-His) box polypeptide 15 [Source:MGI Symbol;Acc:MGI:1099786]	gene	overlapping	0	9.41627	8.92452	9.12828	8.65248	8.89048	8.31672	9.38707	9.10815	8.62281	8.66209	9.04842	8.01533	8.09855	8.00907	8.22398	8.42018	8.50964	8.50991	8.13255	8.23165
Prpf38a	4	108563172	108579336	-	0.0377815	Prpf38a	ENSMUSG00000063800	PRP38 pre-mRNA processing factor 38 (yeast) domain containing A [Source:MGI Symbol;Acc:MGI:1916962]	gene	overlapping	0	8.2962	7.80366	8.0869	7.38117	7.72015	7.25133	7.59591	8.05938	7.27612	7.6394	7.7424	6.59992	7.47116	7.04703	6.7209	7.17386	7.07434	7.2683	6.94701	7.13574
Gtf2f1	17	57003405	57011288	-	0.02592	Gtf2f1	ENSMUSG00000002658	general transcription factor IIF, polypeptide 1 [Source:MGI Symbol;Acc:MGI:1923848]	gene	overlapping	0	8.77146	8.33104	8.66729	7.9405	8.11895	7.75498	8.77232	8.25771	8.11843	7.7121	8.22865	7.4953	7.50623	7.71739	8.11804	7.54792	7.72126	7.43512	7.47678	7.4142
Atp5a1	18	77773729	77782869	+	0.0431241	Atp5a1	ENSMUSG00000025428	ATP synthase, H+ transporting, mitochondrial F1 complex, alpha subunit 1 [Source:MGI Symbol;Acc:MGI:88115]	gene	overlapping	0	9.65359	9.14908	9.26972	8.55675	8.90041	8.18177	9.38128	9.2524	8.70514	8.75036	9.11714	8.16884	8.27499	8.22117	8.54637	8.55237	8.82787	8.10682	8.08627	8.07343
Pak1ip1	13	41001023	41013019	+	0.036097	Pak1ip1	ENSMUSG00000038683	PAK1 interacting protein 1 [Source:MGI Symbol;Acc:MGI:1915333]	gene	overlapping	0	9.11711	8.34598	8.73336	7.99623	8.46035	7.70405	8.68647	8.76378	7.87076	8.21938	8.39617	7.73265	7.83219	7.65932	8.10682	7.85127	7.84945	7.81202	7.54624	7.49372
Uqcc	2	155846894	155930310	-	0.0243281	Uqcc	ENSMUSG00000005882	ubiquinol-cytochrome c reductase complex chaperone, CBP3 homolog (yeast) [Source:MGI Symbol;Acc:MGI:1929472]	gene	overlapping	0	7.80767	7.6061	8.18861	7.77957	7.59168	7.3768	7.89395	7.83174	7.88789	7.38686	7.25812	7.3825	6.61822	6.74867	7.54729	7.20191	7.50347	6.7209	7.00383	7.19674
Ctdp1	18	80407959	80469695	-	0.0437615	Ctdp1	ENSMUSG00000033323	CTD (carboxy-terminal domain, RNA polymerase II, polypeptide A) phosphatase, subunit 1 [Source:MGI Symbol;Acc:MGI:1926953]	gene	overlapping	0	7.12211	7.21997	7.83377	7.03134	8.03416	6.96197	7.11817	7.74628	7.17703	6.85595	6.91695	6.57123	6.8857	6.79069	6.7061	6.82679	6.74866	6.64017	6.70472	6.79149
Rnps1	17	24414675	24425895	+	0.0101539	Rnps1	ENSMUSG00000034681	ribonucleic acid binding protein S1 [Source:MGI Symbol;Acc:MGI:97960]	gene	overlapping	0	9.12835	8.48428	8.73117	8.19508	8.56045	7.87562	8.95029	8.9023	8.26986	8.33501	8.48396	7.83146	7.91209	7.78869	8.08728	7.98046	8.32734	7.82729	7.63558	7.75767
Atg13	2	91674618	91710576	-	0.0105089	Atg13	ENSMUSG00000027244	ATG13 autophagy related 13 homolog (S. cerevisiae) [Source:MGI Symbol;Acc:MGI:1196429]	gene	overlapping	0	8.21764	8.08818	8.52531	8.54073	8.78034	8.21506	8.51067	9.02868	8.45181	8.14078	8.43229	7.95349	7.53104	7.73207	8.10431	7.98286	8.11863	7.55006	7.48224	7.52287
Ncbp1	4	46138613	46172403	+	0.0291175	Ncbp1	ENSMUSG00000028330	nuclear cap binding protein subunit 1 [Source:MGI Symbol;Acc:MGI:1891840]	gene	overlapping	0	9.45252	8.76887	8.98532	8.47869	8.7652	8.24354	8.62975	9.14821	8.40212	8.46412	8.90736	7.64191	8.21383	7.84573	8.20188	8.28148	8.50285	8.03759	7.77318	7.86214
Yars	4	129189760	129219607	+	0.048017	Yars	ENSMUSG00000028811	tyrosyl-tRNA synthetase [Source:MGI Symbol;Acc:MGI:2147627]	gene	overlapping	0	8.42643	7.70213	8.25034	7.79976	7.93251	7.98329	8.1379	8.37135	7.99549	7.89312	7.77651	7.03094	7.18767	7.26366	6.98475	7.85193	8.22826	7.38335	7.30792	7.01213
Znhit6	3	145576208	145605245	+	0.02592	Znhit6	ENSMUSG00000074182	zinc finger, HIT type 6 [Source:MGI Symbol;Acc:MGI:1916996]	gene	overlapping	0	8.04112	7.74784	8.23186	7.17639	7.97449	7.39159	8.35917	8.22829	7.45779	7.46972	7.61149	7.18138	7.08444	7.2913	7.52872	6.81338	7.54973	7.28278	6.95051	6.9645
Sirt7	11	120618372	120625240	-	0.0400066	Sirt7	ENSMUSG00000025138	sirtuin 7 (silent mating type information regulation 2, homolog) 7 (S. cerevisiae) [Source:MGI Symbol;Acc:MGI:2385849]	gene	overlapping	0	7.72447	7.23516	7.49076	6.97586	7.38877	7.21714	7.1082	7.28999	6.88789	7.01155	7.44295	6.58338	6.84062	5.95467	6.86404	6.01543	6.70843	6.50042	6.69639	6.16011
Gulo	14	65986787	66009210	-	0.0407428	Gulo	ENSMUSG00000034450	gulonolactone (L-) oxidase [Source:MGI Symbol;Acc:MGI:1353434]	gene	overlapping	0	9.5845	8.97118	9.17134	8.65663	8.67087	8.23843	9.09007	9.30458	8.82453	8.99882	8.93342	8.01757	7.85126	8.28373	8.53571	8.64004	8.90951	7.94189	8.16952	8.02355
Dppa2	16	48310477	48319723	+	0.0412262	Dppa2	ENSMUSG00000072419	developmental pluripotency associated 2 [Source:MGI Symbol;Acc:MGI:2157523]	gene	overlapping	0	9.60029	9.25112	9.02386	8.36135	8.80212	8.0313	9.28455	9.18579	8.55107	8.78582	8.99388	8.20664	8.29518	8.24915	8.40387	8.29119	8.08678	8.45295	8.05768	8.14012
Prpf8	11	75486816	75509449	+	0.00364522	Prpf8	ENSMUSG00000020850	pre-mRNA processing factor 8 [Source:MGI Symbol;Acc:MGI:2179381]	gene	overlapping	0	8.85808	8.46025	8.68438	8.13974	7.83148	8.06321	8.63671	8.71834	8.43699	8.43234	8.44913	7.67137	7.54516	7.71317	7.87217	8.0019	7.60036	7.87143	7.73046	7.74794
Ap4b1	3	103809520	103822025	+	0.0115992	Ap4b1	ENSMUSG00000032952	adaptor-related protein complex AP-4, beta 1 [Source:MGI Symbol;Acc:MGI:1337130]	gene	overlapping	0	7.60611	7.30878	7.9476	7.21166	7.6503	7.51098	7.75645	7.79208	7.49494	7.35573	7.22556	6.99614	7.09855	6.96536	7.26942	6.87276	6.3956	7.17944	6.94525	6.40549
Cad	5	31054780	31078479	+	0.0435419	Cad	ENSMUSG00000013629	carbamoyl-phosphate synthetase 2, aspartate transcarbamylase, and dihydroorotase [Source:MGI Symbol;Acc:MGI:1916969]	gene	overlapping	0	8.98173	8.17638	8.04165	8.34212	8.07332	8.18743	8.8858	8.38191	8.31159	7.93747	8.38424	7.57959	7.59216	7.44943	7.79269	7.81338	8.35641	7.32644	7.23356	7.506
Myl6	10	128490860	128493875	-	0.043599	Myl6	ENSMUSG00000090841	myosin, light polypeptide 6, alkali, smooth muscle and non-muscle [Source:MGI Symbol;Acc:MGI:109318]	gene	overlapping	0	7.82159	7.29436	7.297	6.68574	6.77819	6.14259	7.15544	7.44372	6.82667	7.09802	7.02496	6.42362	6.43824	6.42812	6.64363	6.48165	6.75698	6.26942	6.17628	6.12341
Gle1	2	29935426	29960371	+	0.00429419	Gle1	ENSMUSG00000019715	GLE1 RNA export mediator (yeast) [Source:MGI Symbol;Acc:MGI:1921662]	gene	overlapping	0	8.85055	8.45863	8.96588	8.33133	8.65969	8.39618	8.85035	8.94786	8.31413	8.37378	8.47879	7.73402	8.10683	7.45112	8.47494	8.21217	8.22975	7.66759	7.69534	7.69711
Paip2b	6	83805401	83831741	-	0.0428173	Paip2b	ENSMUSG00000045896	poly(A) binding protein interacting protein 2B [Source:MGI Symbol;Acc:MGI:2386865]	gene	overlapping	0	9.21354	8.35383	8.81786	8.75652	8.70754	8.40714	8.7104	9.12373	8.62076	8.34358	8.41073	8.12536	7.92799	8.25594	8.40947	8.28489	7.54973	8.50849	7.45841	7.78981
Bex6	16	32186192	32186890	+	0.0474906	Bex6	ENSMUSG00000075269	brain expressed gene 6 [Source:MGI Symbol;Acc:MGI:3588247]	gene	overlapping	0	7.16401	6.71301	6.73773	6.46018	7.05637	6.42373	7.28853	7.37542	6.859	6.93585	6.78072	6.53102	6.67925	6.3249	6.64879	6.08179	5.83968	5.72417	6.08347	5.98413
Sip1	12	59013393	59027988	+	0.0371972	Sip1	ENSMUSG00000060121	survival of motor neuron protein interacting protein 1 [Source:MGI Symbol;Acc:MGI:1913853]	gene	overlapping	0	7.86557	7.6393	7.84597	7.2126	6.82399	6.86196	7.78301	7.99626	7.3834	7.65325	7.62248	7.03094	6.63593	7.23449	6.80045	7.01074	6.73186	6.57832	6.56639	6.76563
Trim28	7	13024152	13031035	+	0.0429991	Trim28	ENSMUSG00000005566	tripartite motif-containing 28 [Source:MGI Symbol;Acc:MGI:109274]	gene	overlapping	0	9.56071	9.06074	8.81734	8.41918	8.81604	8.19763	9.08652	8.90794	8.53637	8.35815	8.75742	7.87226	7.7155	8.15163	8.34778	8.39159	8.65318	7.9214	8.04789	7.78981
Akap8	17	32303676	32321153	-	0.0102173	Akap8	ENSMUSG00000024045	A kinase (PRKA) anchor protein 8 [Source:MGI Symbol;Acc:MGI:1928488]	gene	overlapping	0	9.29232	9.48587	9.60644	8.5748	9.28129	8.62411	9.39979	9.51595	9.03724	8.97222	9.45528	8.60216	8.63461	8.60566	8.46277	8.45254	8.08678	8.41099	8.44013	8.34719
Dhx16	17	35879819	35892670	+	0.0139286	Dhx16	ENSMUSG00000024422	DEAH (Asp-Glu-Ala-His) box polypeptide 16 [Source:MGI Symbol;Acc:MGI:1916442]	gene	overlapping	0	7.62034	7.80239	8.20764	7.52452	7.57987	7.72998	7.76916	8.16477	7.82097	7.84392	7.40347	7.15619	6.62887	6.78131	7.59537	7.60895	7.64703	6.85513	6.97397	6.86002
Rpap3	15	97675105	97705822	-	0.0075123	Rpap3	ENSMUSG00000022466	RNA polymerase II associated protein 3 [Source:MGI Symbol;Acc:MGI:1277218]	gene	overlapping	0	9.10197	8.34511	8.62897	8.26073	8.57144	8.05511	9.06297	8.85934	8.34074	8.37198	8.55037	7.92393	7.87977	7.91048	8.25198	7.87792	7.86301	8.0474	7.6334	7.51884
Bcl2l13	6	120836230	120892842	+	0.00650704	Bcl2l13	ENSMUSG00000009112	BCL2-like 13 (apoptosis facilitator) [Source:MGI Symbol;Acc:MGI:2136959]	gene	overlapping	0	8.89147	8.61266	9.32087	8.47634	8.86555	8.47266	8.73846	8.76812	8.53289	8.43348	8.74312	7.90409	8.08701	7.8769	7.88171	8.19779	7.65708	8.47591	7.8475	8.0748
Hdac1	4	129516104	129542713	-	0.0467477	Hdac1	ENSMUSG00000028800	histone deacetylase 1 [Source:MGI Symbol;Acc:MGI:108086]	gene	overlapping	0	9.4335	8.74784	9.00404	8.20883	8.68565	8.02933	9.14426	8.99943	8.41542	8.54064	8.79188	7.45289	7.89382	7.9958	8.51558	8.31755	8.38422	7.93133	7.92176	7.84775
Mfsd7c	12	85746539	85813585	+	0.00186718	Mfsd7c	ENSMUSG00000034258	major facilitator superfamily domain containing 7C [Source:MGI Symbol;Acc:MGI:2384974]	gene	overlapping	0	8.58993	8.39329	8.66843	8.53622	8.55241	8.02894	8.52123	8.73998	8.4435	8.32886	8.35161	7.46771	7.46523	7.7237	7.88317	8.19365	8.27829	7.35517	7.80308	7.73931
Eme1	11	94644996	94653964	-	0.0248386	Eme1	ENSMUSG00000039055	essential meiotic endonuclease 1 homolog 1 (S. pombe) [Source:MGI Symbol;Acc:MGI:3576783]	gene	overlapping	0	6.66736	7.14958	6.94098	6.55379	7.19452	6.76496	6.72808	7.46985	6.99422	6.67766	6.72066	6.41854	5.93086	6.10189	6.01308	5.88819	6.83181	6.10619	6.49491	6.28564
Kctd20	17	28951950	28969549	+	0.0274031	Kctd20	ENSMUSG00000005936	potassium channel tetramerisation domain containing 20 [Source:MGI Symbol;Acc:MGI:1914239]	gene	overlapping	0	8.07897	7.89971	8.14813	7.30818	8.25707	7.81839	7.9009	7.42341	7.64757	7.41501	7.5355	7.45784	7.01444	7.5578	7.25028	6.88563	7.06431	7.02108	6.69115	7.19842
Mphosph10	7	64376576	64392268	-	0.00644027	Mphosph10	ENSMUSG00000030521	M-phase phosphoprotein 10 (U3 small nucleolar ribonucleoprotein) [Source:MGI Symbol;Acc:MGI:1915223]	gene	overlapping	0	8.10324	8.37626	8.60345	7.8772	8.27184	7.8161	8.35581	8.50447	7.58171	7.96866	8.24498	7.50491	7.52725	7.38187	7.68194	7.5226	6.88217	7.46179	7.27821	7.61451
Tpx2	2	152847964	152895321	+	0.00381261	Tpx2	ENSMUSG00000027469	TPX2, microtubule-associated protein homolog (Xenopus laevis) [Source:MGI Symbol;Acc:MGI:1919369]	gene	overlapping	0	9.25061	8.89554	9.43161	8.55304	9.13889	8.58684	9.2068	8.8412	8.63016	8.44206	8.78002	8.07355	8.31894	8.27038	8.42008	8.49053	8.16864	7.82577	8.21289	8.24919
Crnkl1	2	145917479	145935014	-	0.018784	Crnkl1	ENSMUSG00000001767	Crn, crooked neck-like 1 (Drosophila) [Source:MGI Symbol;Acc:MGI:1914127]	gene	overlapping	0	9.92374	9.30294	9.45868	8.75813	9.14257	8.40987	9.56307	9.63418	8.8387	9.00693	9.35066	8.51009	8.6012	8.38895	8.59448	8.69847	8.56464	8.50232	8.42508	8.42429
Hnrnpk	13	58391142	58403343	-	0.0458763	Hnrnpk	ENSMUSG00000021546	heterogeneous nuclear ribonucleoprotein K [Source:MGI Symbol;Acc:MGI:99894]	gene	overlapping	0	9.85018	9.15907	9.36393	8.75329	9.06558	8.46306	9.41645	9.46451	8.88925	8.95235	9.2116	8.27939	7.74353	8.17279	8.32428	8.7879	8.81197	8.56744	8.5413	8.5801
Cct7	6	85451505	85468477	+	0.0355442	Cct7	ENSMUSG00000030007	chaperonin containing Tcp1, subunit 7 (eta) [Source:MGI Symbol;Acc:MGI:107184]	gene	overlapping	0	9.55238	8.86047	9.08519	8.3309	8.61985	7.99261	9.1913	9.19688	8.56349	8.72528	8.79881	8.0276	7.95856	7.93788	8.37869	8.41175	8.70575	7.92424	7.91549	7.96104
Hnrnpa1	15	103240432	103244955	+	0.0157622	Hnrnpa1	ENSMUSG00000046434	heterogeneous nuclear ribonucleoprotein A1 [Source:MGI Symbol;Acc:MGI:104820]	gene	overlapping	0	9.55702	9.11049	8.9963	8.42812	8.71836	8.04579	9.30739	9.09389	8.51624	8.66892	8.93342	8.05458	8.22557	8.06647	8.3151	8.18327	8.31259	8.34247	7.932	8.02923
Nol11	11	107166663	107189381	-	0.0105447	Nol11	ENSMUSG00000018433	nucleolar protein 11 [Source:MGI Symbol;Acc:MGI:1916229]	gene	overlapping	0	9.1007	8.29798	8.89768	8.46137	8.69253	8.22404	8.79735	8.94402	8.39495	8.33501	8.55119	8.06599	7.7155	7.80266	7.43412	8.32843	7.93908	7.80432	8.07225	7.98608
Eif3b	5	140419305	140443358	+	0.0131096	Eif3b	ENSMUSG00000056076	eukaryotic translation initiation factor 3, subunit B [Source:MGI Symbol;Acc:MGI:106478]	gene	overlapping	0	9.57768	9.10843	9.16891	8.50966	8.85904	8.24591	9.0343	9.23861	8.57369	8.53264	8.72503	8.0326	8.07539	8.19365	8.25142	8.48589	8.77093	8.1907	8.04173	7.87692
Mfap1a	2	121491911	121506665	-	0.047653	Mfap1a	ENSMUSG00000068479	microfibrillar-associated protein 1A [Source:MGI Symbol;Acc:MGI:1914782]	gene	overlapping	0	7.74573	7.48269	7.59443	7.12831	7.14191	7.48305	7.12213	7.75506	7.55537	7.17959	6.73808	6.89742	6.13137	6.88004	6.62975	7.07507	6.46586	7.31022	6.7325	6.77242
AC164085.1	5	94534849	94537928	+	0.0365182	AC164085.1	ENSMUSG00000095074	uncharacterized protein LOC100041102 [Source:RefSeq peptide;Acc:NP_001230866]	gene	overlapping	0	9.28228	8.64854	8.75509	8.0006	8.50581	7.64097	9.00773	8.90174	8.22581	8.43061	8.56752	7.75632	7.62975	7.92211	7.89844	8.01543	8.33987	7.93697	7.69586	7.59677
Eif4b	15	102073773	102097172	+	0.0092156	Eif4b	ENSMUSG00000058655	eukaryotic translation initiation factor 4B [Source:MGI Symbol;Acc:MGI:95304]	gene	overlapping	0	9.84299	9.29617	9.39021	8.78243	9.13956	8.79956	9.48624	9.27916	9.08644	8.78042	9.04783	8.26532	8.16894	8.25352	8.76955	8.89521	8.98721	8.35254	8.37766	8.31655
Sdf4	4	155992872	156013610	+	0.0109326	Sdf4	ENSMUSG00000029076	stromal cell derived factor 4 [Source:MGI Symbol;Acc:MGI:108079]	gene	overlapping	0	8.09435	8.03711	8.39644	7.4673	7.79106	7.29197	7.8823	7.88869	7.60345	7.60519	7.62248	6.63973	7.33907	7.14014	7.68278	7.00721	7.22751	6.54729	7.19858	7.11631
1110034A24Rik	12	69189087	69198429	-	0.0217998	1110034A24Rik	ENSMUSG00000020973	RIKEN cDNA 1110034A24 gene [Source:MGI Symbol;Acc:MGI:1923566]	gene	overlapping	0	7.58993	8.26321	8.14401	7.50621	8.06487	7.46569	7.7071	8.25063	7.43186	7.74019	7.73229	7.54972	7.62533	6.9865	7.06684	7.17281	6.53043	7.07326	6.80985	7.05266
Nubp2	17	24882611	24886350	-	0.00955001	Nubp2	ENSMUSG00000039183	nucleotide binding protein 2 [Source:MGI Symbol;Acc:MGI:1347072]	gene	overlapping	0	8.25803	7.73588	7.9286	7.48922	7.72553	7.26946	8.01201	8.09339	7.61172	7.74851	7.59406	7.15008	6.78617	6.83541	7.53804	7.29457	7.58056	6.43212	7.01978	6.97925
AC125068.1	5	94218025	94221093	+	0.0318768	AC125068.1	ENSMUSG00000096259	No description	gene	overlapping	0	9.25746	8.59878	8.72953	7.96752	8.49012	7.62906	8.9823	8.90061	8.20354	8.41676	8.56833	7.74623	7.61733	7.90061	7.86627	7.98943	8.26448	7.89337	7.67481	7.56844
Tnip1	11	54910785	54962917	-	0.0203255	Tnip1	ENSMUSG00000020400	TNFAIP3 interacting protein 1 [Source:MGI Symbol;Acc:MGI:1926194]	gene	overlapping	0	7.76187	7.53885	8.37134	7.13924	7.76259	7.89175	7.90781	8.11108	7.60842	7.68153	7.25005	7.11912	7.19246	6.98417	7.7404	7.19572	7.42071	6.99696	6.97311	6.36713
Folr1	7	101858331	101870788	-	0.00611624	Folr1	ENSMUSG00000001827	folate receptor 1 (adult) [Source:MGI Symbol;Acc:MGI:95568]	gene	overlapping	0	8.94616	8.63787	8.52341	7.97974	8.23023	7.51998	8.64845	8.70222	8.0897	8.35271	8.31145	7.5073	7.70883	7.51881	8.01041	7.85258	7.97165	7.62627	7.42097	7.43717
Cox7c	13	86044816	86046904	-	0.014178	Cox7c	ENSMUSG00000017778	cytochrome c oxidase, subunit VIIc [Source:MGI Symbol;Acc:MGI:103226]	gene	overlapping	0	6.94969	6.94544	6.89279	6.206	6.07473	5.88828	6.60586	7.04615	6.40355	6.60621	6.53384	5.75967	6.32931	5.95228	6.01575	5.89839	5.77964	5.58373	5.78256	5.68397
Gm16513	5	94873797	94876892	+	0.0318668	Gm16513	ENSMUSG00000095954	predicted gene, Gm16513 [Source:MGI Symbol;Acc:MGI:2141041]	gene	overlapping	0	9.28619	8.64357	8.76262	7.99842	8.50529	7.64561	9.01522	8.91578	8.22149	8.4449	8.55283	7.78027	7.6324	7.95168	7.88901	8.03173	8.30976	7.90637	7.69482	7.61136
Gpank1	17	35121455	35124814	+	0.0339269	Gpank1	ENSMUSG00000092417	G patch domain and ankyrin repeats 1 [Source:MGI Symbol;Acc:MGI:2148975]	gene	overlapping	0	7.44554	6.95923	7.71241	7.01848	7.29792	6.84146	7.5046	7.81625	7.5605	7.19996	6.74096	6.9488	6.14627	7.04143	6.91355	6.64346	7.22601	6.47154	6.42854	6.22093
Hnrnpm	17	33646233	33686860	-	0.0271906	Hnrnpm	ENSMUSG00000059208	heterogeneous nuclear ribonucleoprotein M [Source:MGI Symbol;Acc:MGI:1926465]	gene	overlapping	0	9.2806	8.36768	8.76208	8.1501	8.77214	8.23194	9.00987	8.48576	8.21824	8.07099	8.59566	7.56205	7.85656	7.77187	8.04283	8.04956	8.39627	7.53711	7.56524	7.51074
AC134841.1	5	93482139	93485346	-	0.0282518	AC134841.1	ENSMUSG00000096044	No description	gene	overlapping	0	9.24718	8.57585	8.73664	7.93424	8.47849	7.63218	8.98175	8.8663	8.17591	8.391	8.49936	7.759	7.61287	7.88568	7.83184	7.9672	8.24537	7.87511	7.6679	7.59166
Wdr36	18	32837225	32866420	+	0.00590009	Wdr36	ENSMUSG00000038299	WD repeat domain 36 [Source:MGI Symbol;Acc:MGI:1917819]	gene	overlapping	0	9.55841	8.96607	9.27349	8.44504	8.85333	8.40593	9.19554	9.29516	8.5472	8.63142	8.79119	7.93108	8.14935	8.18046	8.29985	8.35088	8.65541	8.38076	8.20594	7.95508
D19Bwg1357e	19	27388702	27429820	-	0.0133625	D19Bwg1357e	ENSMUSG00000041360	DNA segment, Chr 19, Brigham & Women's Genetics 1357 expressed [Source:MGI Symbol;Acc:MGI:106253]	gene	overlapping	0	9.08924	8.33809	9.22371	8.18936	8.69435	8.125	9.00182	9.12324	8.23762	8.46804	8.31242	7.68553	7.87903	8.20222	8.18004	8.16438	8.02864	8.1907	8.03679	7.70008
Taf1d	9	15306214	15312104	+	0.0363919	Taf1d	ENSMUSG00000031939	TATA box binding protein (Tbp)-associated factor, RNA polymerase I, D [Source:MGI Symbol;Acc:MGI:1922566]	gene	overlapping	0	8.11208	8.45296	8.3066	7.5948	7.86514	7.21229	8.37006	8.57628	7.89265	7.88895	8.15599	7.52867	7.19604	7.69473	7.1913	6.60507	7.27467	7.41907	7.30106	7.39159
Sf3a3	4	124714776	124732460	+	0.0467095	Sf3a3	ENSMUSG00000028902	splicing factor 3a, subunit 3 [Source:MGI Symbol;Acc:MGI:1922312]	gene	overlapping	0	8.47814	7.71572	8.42315	7.73375	7.34523	7.55544	8.20305	8.06645	7.7463	7.87381	7.97564	6.52945	7.34876	6.64313	7.54082	7.54549	7.75283	6.7209	7.08985	7.12959
Plk1	7	122159437	122169875	+	0.0144449	Plk1	ENSMUSG00000030867	polo-like kinase 1 (Drosophila) [Source:MGI Symbol;Acc:MGI:97621]	gene	overlapping	0	8.66221	8.17146	8.86957	8.31958	8.60195	7.94285	8.72352	7.84707	7.79868	7.94392	7.98904	7.52316	7.77423	7.31286	8.05586	7.76545	7.89731	7.44604	7.40188	7.42429
Spns1	7	126370060	126377450	-	0.0254398	Spns1	ENSMUSG00000030741	spinster homolog 1 (Drosophila) [Source:MGI Symbol;Acc:MGI:1920908]	gene	overlapping	0	9.43199	8.78379	9.10139	8.58974	8.81352	8.16034	9.11269	9.21381	8.66357	8.7121	8.62248	7.88152	7.73205	8.16044	8.46911	8.49683	8.90717	7.64793	7.98428	7.96104
Kri1	9	21273458	21287971	-	0.00695373	Kri1	ENSMUSG00000035047	KRI1 homolog (S. cerevisiae) [Source:MGI Symbol;Acc:MGI:2384899]	gene	overlapping	0	7.79518	6.8769	7.48167	6.7494	7.29551	7.37494	7.5436	7.65811	7.1692	7.01001	7.06691	6.74623	6.58033	6.78668	6.80045	6.71731	6.65597	6.13348	6.56181	6.50803
Ddx52	11	83942062	83963088	+	0.0339269	Ddx52	ENSMUSG00000020677	DEAD (Asp-Glu-Ala-Asp) box polypeptide 52 [Source:MGI Symbol;Acc:MGI:1925644]	gene	overlapping	0	7.68947	8.67454	8.59323	8.01254	8.56246	7.93488	8.41605	8.69702	8.05676	7.53424	8.00471	7.78422	6.91645	7.44179	7.95308	7.66899	7.23796	7.6341	7.59749	7.56584
Mthfd1	12	76255232	76319820	+	0.00609849	Mthfd1	ENSMUSG00000021048	methylenetetrahydrofolate dehydrogenase (NADP+ dependent), methenyltetrahydrofolate cyclohydrolase, formyltetrahydrofolate synthase [Source:MGI Symbol;Acc:MGI:1342005]	gene	overlapping	0	8.2489	7.82766	8.63484	7.66319	8.24153	7.78189	8.08093	8.32578	7.67861	7.74019	7.63802	7.30667	6.85126	7.20673	7.32644	7.82812	7.66705	7.29272	7.33635	7.2888
Ppan	9	20888175	20892178	+	0.0228519	Ppan	ENSMUSG00000004100	peter pan homolog (Drosophila) [Source:MGI Symbol;Acc:MGI:2178445]	gene	overlapping	0	9.20117	8.41762	8.80386	7.91528	8.40393	7.73192	8.67436	8.80603	8.05978	8.27356	8.4736	7.46443	7.69115	7.59422	8.14937	7.75567	8.20105	7.54452	7.54682	7.47581
Ctps	4	120539868	120570276	-	0.0248438	Ctps	ENSMUSG00000028633	cytidine 5'-triphosphate synthase [Source:MGI Symbol;Acc:MGI:1858304]	gene	overlapping	0	8.43953	8.1365	8.60584	8.05672	8.62848	8.02696	8.38418	8.17041	7.69661	7.92202	7.95468	6.38076	7.54047	7.40997	7.78802	7.86433	7.58056	7.64879	7.57152	7.50056
Ddx21	10	62580248	62602298	-	0.00736165	Ddx21	ENSMUSG00000020075	DEAD (Asp-Glu-Ala-Asp) box polypeptide 21 [Source:MGI Symbol;Acc:MGI:1860494]	gene	overlapping	0	10.2339	9.1808	9.8543	9.27228	9.55493	9.09161	9.94442	9.9169	9.40379	9.31772	9.71956	8.61034	8.81986	8.7054	8.82767	9.10537	9.21358	8.84503	8.73428	8.64997
Rars	11	35808381	35834506	-	0.00487281	Rars	ENSMUSG00000018848	arginyl-tRNA synthetase [Source:MGI Symbol;Acc:MGI:1914297]	gene	overlapping	0	9.23393	8.85249	9.15223	8.1927	8.70119	8.02854	9.01895	9.02713	8.49806	8.58003	8.65646	8.10391	7.75411	7.76848	8.29272	8.20037	8.47157	7.79658	7.91908	7.82016
Eif3l	15	79075223	79094400	+	0.0418549	Eif3l	ENSMUSG00000033047	eukaryotic translation initiation factor 3, subunit L [Source:MGI Symbol;Acc:MGI:2386251]	gene	overlapping	0	9.39522	8.44971	8.81941	8.23316	8.36544	7.88871	8.93006	8.85934	8.29679	8.4753	8.33262	7.52631	7.70966	7.37119	7.96831	8.13504	8.6593	7.96624	7.80502	7.66159
Adam17	12	21323509	21373632	-	0.00618751	Adam17	ENSMUSG00000052593	a disintegrin and metallopeptidase domain 17 [Source:MGI Symbol;Acc:MGI:1096335]	gene	overlapping	0	7.43954	8.36854	8.50365	8.16427	8.12099	7.57069	7.83108	8.2129	7.81525	8.09729	7.51376	7.23242	7.38376	7.33042	7.46667	7.61128	7.38758	6.85959	7.68063	7.141
Ctsb	14	63122462	63145919	+	0.0199065	Ctsb	ENSMUSG00000021939	cathepsin B [Source:MGI Symbol;Acc:MGI:88561]	gene	overlapping	0	9.35483	8.96322	9.04915	8.30244	8.9142	7.98003	9.10419	9.02661	8.40117	8.50289	8.49254	8.11389	8.24992	8.403	8.57742	7.91982	7.91789	7.93978	7.98642	7.54881
Incenp	19	9872297	9899533	-	0.0414683	Incenp	ENSMUSG00000024660	inner centromere protein [Source:MGI Symbol;Acc:MGI:1313288]	gene	overlapping	0	7.65186	7.45377	7.72788	7.45144	8.25088	7.78236	7.88697	7.16383	7.27924	6.775	7.12984	6.4961	6.83603	6.60566	7.4657	6.85193	7.28334	6.82044	6.62464	6.8125
Nup133	8	123897123	123949265	-	0.00741589	Nup133	ENSMUSG00000039509	nucleoporin 133 [Source:MGI Symbol;Acc:MGI:2442620]	gene	overlapping	0	8.50715	7.94544	8.72678	7.71327	8.12371	7.80187	8.10619	8.13145	7.838	7.94231	7.86505	6.92751	7.37219	7.28941	7.71434	7.74016	6.97967	7.34778	7.56352	7.36414
Gmps	3	63976106	64022579	+	0.0363428	Gmps	ENSMUSG00000027823	guanine monophosphate synthetase [Source:MGI Symbol;Acc:MGI:2448526]	gene	overlapping	0	9.24201	8.48825	8.74969	7.89197	8.37003	7.91667	8.8676	8.94786	8.3121	8.20669	8.30951	7.64191	7.75167	8.06316	7.64535	7.44126	8.25569	8.25989	7.76074	7.3731
Taf7	18	37640902	37644204	-	0.0163204	Taf7	ENSMUSG00000051316	TAF7 RNA polymerase II, TATA box binding protein (TBP)-associated factor [Source:MGI Symbol;Acc:MGI:1346348]	gene	overlapping	0	8.1567	8.53655	8.04871	7.41918	8.22202	7.81107	8.43372	8.32914	7.79069	7.64931	7.76523	7.05948	7.39939	6.85726	7.09992	7.40149	7.21698	7.79347	7.59693	7.55078
Stip1	19	7020696	7040026	-	0.0274341	Stip1	ENSMUSG00000024966	stress-induced phosphoprotein 1 [Source:MGI Symbol;Acc:MGI:109130]	gene	overlapping	0	9.89183	9.39625	9.32306	8.58756	8.99651	8.18778	9.55024	9.42301	8.75267	8.94392	9.16568	8.17186	8.24416	8.3318	8.53292	8.56802	8.95681	8.36358	8.19489	8.12871
Ncl	1	86344719	86359455	-	0.00506125	Ncl	ENSMUSG00000026234	nucleolin [Source:MGI Symbol;Acc:MGI:97286]	gene	overlapping	0	10.3103	9.80366	9.90766	9.30266	9.63563	8.92305	10.0311	9.94348	9.36125	9.44661	9.81566	8.76635	8.77662	8.86584	8.96141	9.15005	9.29375	8.67013	8.8662	8.83213
Kif20a	18	34624624	34633265	+	0.00276918	Kif20a	ENSMUSG00000003779	kinesin family member 20A [Source:MGI Symbol;Acc:MGI:1201682]	gene	overlapping	0	9.61458	8.89733	9.53288	8.61131	8.97336	8.54142	9.43332	9.32662	8.7478	8.7121	8.90222	8.19382	8.29128	8.30866	8.20773	8.60156	8.71058	8.39057	8.07747	8.2143
Nxf1	19	8757103	8770909	+	0.00873755	Nxf1	ENSMUSG00000010097	nuclear RNA export factor 1 homolog (S. cerevisiae) [Source:MGI Symbol;Acc:MGI:1858330]	gene	overlapping	0	9.48253	8.53118	9.00902	8.38576	8.90515	8.1098	9.24869	8.98458	8.4342	8.49081	8.76806	7.79862	7.92151	8.0358	8.21878	8.18223	8.33501	8.10932	7.91818	7.82344
Gtpbp4	13	8972071	8996017	-	0.00482811	Gtpbp4	ENSMUSG00000021149	GTP binding protein 4 [Source:MGI Symbol;Acc:MGI:1916487]	gene	overlapping	0	9.65402	8.98697	9.04827	8.44824	8.97749	8.31122	9.24096	9.20788	8.55279	8.60824	9.00651	8.23435	8.20021	8.11635	8.35359	8.21726	8.20181	8.17765	7.92087	8.08256
2210016L21Rik	5	114942158	114949783	+	0.0457173	2210016L21Rik	ENSMUSG00000029559	RIKEN cDNA 2210016L21 gene [Source:MGI Symbol;Acc:MGI:1919607]	gene	overlapping	0	7.87004	7.3599	8.08519	7.06091	7.80042	7.3283	7.37755	7.82818	7.23065	7.05989	7.31339	6.93108	7.07668	6.91232	7.25028	6.03173	6.37951	7.15665	6.70056	6.32773
Hbp1	12	31926254	31950535	-	0.00348751	Hbp1	ENSMUSG00000002996	high mobility group box transcription factor 1 [Source:MGI Symbol;Acc:MGI:894659]	gene	overlapping	0	8.81232	8.63143	9.04695	7.96697	8.78935	8.15997	8.72938	9.02142	8.42202	8.44661	8.17849	7.47751	7.62799	8.14066	7.89192	8.1345	7.80997	8.16929	8.07225	7.92239
Cct3	3	88297116	88321767	+	0.022346	Cct3	ENSMUSG00000001416	chaperonin containing Tcp1, subunit 3 (gamma) [Source:MGI Symbol;Acc:MGI:104708]	gene	overlapping	0	9.66822	9.01693	9.14936	8.42488	8.79745	8.04618	9.28056	9.1895	8.572	8.72856	8.91504	7.92811	7.96627	8.24037	8.34566	8.35412	8.75127	7.95794	8.02061	7.82833
Pom121	5	135376141	135394546	-	0.0300953	Pom121	ENSMUSG00000053293	nuclear pore membrane protein 121 [Source:MGI Symbol;Acc:MGI:2137624]	gene	overlapping	0	7.68778	7.77277	7.91226	7.7046	8.46196	7.78657	8.09007	8.46068	7.86177	7.56073	7.61149	7.09598	7.37007	7.06039	7.31456	7.53817	6.30196	7.63497	7.15819	7.3208
Rps28	17	33819027	33824562	-	0.00410642	Rps28	ENSMUSG00000067288	ribosomal protein S28 [Source:MGI Symbol;Acc:MGI:1859516]	gene	overlapping	0	6.90679	6.92686	6.73555	6.05882	6.21121	5.83155	6.42169	6.90681	6.10619	6.52888	6.26013	5.83273	5.98987	5.76916	5.95029	5.67642	5.73397	5.55832	5.86852	5.52957
Lass5	15	99733506	99772885	-	0.0288807	Lass5	ENSMUSG00000023021	LAG1 homolog, ceramide synthase 5 [Source:MGI Symbol;Acc:MGI:1919199]	gene	overlapping	0	8.65273	8.26043	8.67586	8.00224	8.45766	7.7991	8.25549	8.76689	7.88038	8.14569	7.79743	7.80577	7.73288	7.91171	8.06168	7.37891	6.76733	7.60869	7.72841	7.24879
Atg9a	1	75180866	75191923	-	0.000142045	Atg9a	ENSMUSG00000033124	autophagy-related 9A (yeast) [Source:MGI Symbol;Acc:MGI:2138446]	gene	overlapping	0	8.04112	7.85372	8.5689	8.04409	8.16318	7.85175	8.34566	8.64197	8.23065	8.12454	7.85044	7.39806	7.52345	7.311	7.7028	7.67568	7.36051	7.08855	7.64047	7.57752
Cd2bp2	7	127191660	127196000	-	0.0229049	Cd2bp2	ENSMUSG00000042502	CD2 antigen (cytoplasmic tail) binding protein 2 [Source:MGI Symbol;Acc:MGI:1917483]	gene	overlapping	0	8.40399	7.79087	8.29922	7.88076	7.23275	7.54556	7.86108	7.73618	7.6224	7.41153	7.97074	7.42447	6.915	7.23744	7.01708	7.13773	6.95817	6.48894	6.98085	6.70305
Sgk1	10	21882184	21999903	+	0.000901421	Sgk1	ENSMUSG00000019970	serum/glucocorticoid regulated kinase 1 [Source:MGI Symbol;Acc:MGI:1340062]	gene	overlapping	0	9.28619	8.97458	9.09885	8.54297	8.76607	8.09067	9.04688	9.16712	8.62158	8.63591	8.7884	7.91375	8.31729	8.03072	7.8707	8.2594	8.16004	8.36933	7.97354	7.82344
Fip1l1	5	74535449	74598790	+	0.0244803	Fip1l1	ENSMUSG00000029227	FIP1 like 1 (S. cerevisiae) [Source:MGI Symbol;Acc:MGI:1914149]	gene	overlapping	0	7.47521	7.39244	7.52151	7.206	6.979	7.20184	7.65463	6.91578	6.87969	6.66404	6.9195	6.69115	6.6021	6.87501	5.76599	6.44387	6.28478	6.77705	6.2663	6.40112
Uba2	7	34140689	34169599	-	0.000170349	Uba2	ENSMUSG00000052997	ubiquitin-like modifier activating enzyme 2 [Source:MGI Symbol;Acc:MGI:1858313]	gene	overlapping	0	9.1007	8.69115	9.23186	8.4354	8.87726	8.27113	9.05677	9.02713	8.5224	8.49137	8.68593	7.87659	7.81053	8.28326	8.24347	8.00544	8.19493	8.14998	7.88419	7.8218
Rbm5	9	107740495	107771002	-	0.0248847	Rbm5	ENSMUSG00000032580	RNA binding motif protein 5 [Source:MGI Symbol;Acc:MGI:1933204]	gene	overlapping	0	6.81697	7.67036	7.58233	7.52755	7.55795	7.36061	8.05313	7.83174	7.19916	7.11528	7.0107	6.71205	6.06758	6.8838	6.84466	7.35689	7.24389	6.68446	6.51637	6.5148
F11r	1	171437535	171464603	+	0.00922537	F11r	ENSMUSG00000038235	F11 receptor [Source:MGI Symbol;Acc:MGI:1321398]	gene	overlapping	0	8.77703	8.60975	9.0443	8.37192	8.79234	7.91155	8.57579	8.85409	8.22904	8.23064	8.27909	7.69815	7.94867	8.29413	8.13716	7.88563	8.09911	7.09866	7.7042	7.30294
Tead4	6	128224288	128300823	-	0.00108837	Tead4	ENSMUSG00000030353	TEA domain family member 4 [Source:MGI Symbol;Acc:MGI:106907]	gene	overlapping	0	8.93553	8.40844	8.60703	8.81688	8.79745	8.39435	9.02902	9.02609	8.72396	8.46131	8.18168	7.65851	7.88866	8.03185	8.19719	8.16807	8.5274	8.12238	7.41209	8.05498
Cstf1	2	172370681	172382448	+	0.0131096	Cstf1	ENSMUSG00000027498	cleavage stimulation factor, 3' pre-RNA, subunit 1 [Source:MGI Symbol;Acc:MGI:1914587]	gene	overlapping	0	8.31382	7.40592	8.13078	7.24056	7.94485	7.53172	7.93062	7.95984	7.45687	7.30398	7.83838	7.03204	6.57483	7.02789	6.85513	7.0236	7.57114	6.80971	6.75273	6.79704
Cttn	7	144435733	144471009	-	0.0300953	Cttn	ENSMUSG00000031078	cortactin [Source:MGI Symbol;Acc:MGI:99695]	gene	overlapping	0	6.97206	7.42922	8.04342	8.14616	7.82399	7.8655	8.56854	7.72601	8.31615	7.666	7.57803	7.26955	6.95645	7.20773	7.02108	7.46546	7.26594	7.11493	7.19415	7.11453
Ddx55	5	124552864	124569660	+	0.0499743	Ddx55	ENSMUSG00000029389	DEAD (Asp-Glu-Ala-Asp) box polypeptide 55 [Source:MGI Symbol;Acc:MGI:1915098]	gene	overlapping	0	7.34415	6.45539	7.53665	7.32133	6.90673	7.15493	6.93175	7.64333	7.36688	7.07467	7.42693	6.41345	6.19006	5.82762	5.81585	6.6675	6.93266	6.52685	5.88877	6.64381
Gata4	14	63198922	63271692	-	0.00643569	Gata4	ENSMUSG00000021944	GATA binding protein 4 [Source:MGI Symbol;Acc:MGI:95664]	gene	overlapping	0	7.75543	8.16948	8.71961	7.91817	8.1835	7.60652	8.33116	8.15154	8.14319	7.89396	7.67316	7.07785	7.58762	7.29507	7.87805	7.79235	6.79791	7.29272	7.31949	7.23247
Sap30bp	11	115933282	115966725	+	0.0269822	Sap30bp	ENSMUSG00000020755	SAP30 binding protein [Source:MGI Symbol;Acc:MGI:1927479]	gene	overlapping	0	7.05821	7.93966	8.19736	7.30906	8.02039	7.52893	8.09007	7.8738	7.57072	7.76045	7.65799	6.47343	7.01173	7.5625	7.5909	6.5463	7.11053	6.54175	6.80599	6.88425
Rangap1	15	81704248	81729919	-	0.00199265	Rangap1	ENSMUSG00000022391	RAN GTPase activating protein 1 [Source:MGI Symbol;Acc:MGI:103071]	gene	overlapping	0	9.0431	8.23232	8.56521	8.36939	8.56045	8.25099	8.93232	8.69377	8.50962	8.05692	8.54543	7.55666	7.66811	7.49523	8.01508	7.99419	8.13948	7.42511	7.75424	7.60186
Ccdc137	11	120458115	120464358	+	0.0285055	Ccdc137	ENSMUSG00000049957	coiled-coil domain containing 137 [Source:MGI Symbol;Acc:MGI:1914541]	gene	overlapping	0	6.99135	7.97061	7.957	7.69048	7.83977	7.77251	6.86464	7.84824	7.77531	7.37497	7.4394	6.37902	6.93658	7.04255	7.06297	6.73448	7.08595	7.4793	6.53635	6.45275
Mak16	8	31159468	31168724	-	0.00214243	Mak16	ENSMUSG00000031578	MAK16 homolog (S. cerevisiae) [Source:MGI Symbol;Acc:MGI:1915170]	gene	overlapping	0	8.48982	8.57883	8.0963	7.61985	8.28342	7.65891	8.26539	8.75568	7.93216	8.1217	8.06346	7.42615	7.09727	7.34596	7.95586	7.63662	7.40225	7.4966	7.2928	7.28406
Ddx24	12	103407976	103425867	-	0.00835224	Ddx24	ENSMUSG00000041645	DEAD (Asp-Glu-Ala-Asp) box polypeptide 24 [Source:MGI Symbol;Acc:MGI:1351337]	gene	overlapping	0	8.2603	8.13245	8.14319	7.45939	8.27123	8.03327	8.44327	8.55991	7.96869	7.89312	7.57642	7.60663	6.80819	7.45534	7.7794	7.27024	7.15217	7.86553	7.39095	7.3084
Tpm3	3	90072649	90100902	+	0.00149952	Tpm3	ENSMUSG00000027940	tropomyosin 3, gamma [Source:MGI Symbol;Acc:MGI:1890149]	gene	overlapping	0	9.46981	9.00147	8.8261	8.44143	8.82858	8.12868	9.23043	8.99995	8.58087	8.5581	8.6971	7.87967	7.95926	7.99116	8.17944	8.2907	8.38489	8.13102	7.9675	7.90138
Ccdc99	11	34809190	34833641	-	0.0423624	Ccdc99	ENSMUSG00000069910	coiled-coil domain containing 99 [Source:MGI Symbol;Acc:MGI:1917635]	gene	overlapping	0	8.22465	8.63215	8.24574	7.54335	8.33589	7.81793	8.39652	8.20377	7.65158	7.73089	8.09872	7.16228	7.50623	7.42812	7.82273	7.16015	6.17098	7.45787	7.22272	7.48755
Gltscr2	7	15937838	15946108	-	0.0140216	Gltscr2	ENSMUSG00000041560	glioma tumor suppressor candidate region gene 2 [Source:MGI Symbol;Acc:MGI:2154441]	gene	overlapping	0	9.09179	8.40424	8.6272	7.89725	8.2296	7.6139	8.66962	8.67869	8.13173	8.2652	8.29977	7.43624	7.28287	7.27516	7.94889	7.86888	8.20028	7.412	7.5986	7.43788
Th1l	2	174415804	174427502	+	0.0106063	Th1l	ENSMUSG00000016253	TH1-like homolog (Drosophila) [Source:MGI Symbol;Acc:MGI:1926424]	gene	overlapping	0	7.79988	7.31416	8.01218	7.39201	7.50164	7.61705	8.05417	7.23905	7.39687	6.83701	7.40165	6.6339	7.32386	6.82631	6.5436	6.81203	7.07434	6.60515	6.3497	6.6561
Melk	4	44300876	44364675	+	0.0338748	Melk	ENSMUSG00000035683	maternal embryonic leucine zipper kinase [Source:MGI Symbol;Acc:MGI:106924]	gene	overlapping	0	8.41321	7.35296	7.86808	7.49928	7.44306	7.59432	8.08906	7.44217	7.68881	7.55231	7.54872	6.21301	7.19962	6.32305	7.18656	7.06266	6.85527	7.26157	7.27542	6.8905
Nasp	4	116601052	116627941	-	0.00709526	Nasp	ENSMUSG00000028693	nuclear autoantigenic sperm protein (histone-binding) [Source:MGI Symbol;Acc:MGI:1355328]	gene	overlapping	0	10.0844	9.48864	9.56583	8.84781	9.26263	8.6579	9.62592	9.53464	8.84257	9.01806	9.38654	8.24108	8.80546	8.54795	8.83713	8.47528	8.6654	8.56198	8.36391	8.19506
Cdk11b	4	155624854	155649938	+	0.00150967	Cdk11b	ENSMUSG00000029062	cyclin-dependent kinase 11B [Source:MGI Symbol;Acc:MGI:88353]	gene	overlapping	0	8.45649	7.85249	8.18701	7.78211	8.13115	7.96115	8.5332	7.99837	8.12712	7.63242	8.00471	6.90953	7.37324	7.04703	7.48509	7.42195	7.86108	6.9461	7.11038	7.23493
Alppl2	1	87086690	87089928	-	0.00629181	Alppl2	ENSMUSG00000026246	alkaline phosphatase, placental-like 2 [Source:MGI Symbol;Acc:MGI:108009]	gene	overlapping	0	9.81503	9.45093	9.32887	8.6769	9.02693	8.23433	9.47504	9.45684	8.82738	9.03668	8.89512	8.16329	8.33366	8.33409	8.60338	8.63281	8.97522	8.16809	8.27507	8.21056
Tcof1	18	60813755	60848971	-	0.00837333	Tcof1	ENSMUSG00000024613	Treacher Collins Franceschetti syndrome 1, homolog [Source:MGI Symbol;Acc:MGI:892003]	gene	overlapping	0	7.81851	7.34248	8.16445	7.27612	7.86433	7.81199	7.52872	7.57698	7.87007	7.43348	7.28799	6.53728	7.06497	6.83929	7.13471	7.12585	6.34954	7.25594	7.14753	6.8114
Ctsa	2	164832873	164841032	+	0.00334127	Ctsa	ENSMUSG00000017760	cathepsin A [Source:MGI Symbol;Acc:MGI:97748]	gene	overlapping	0	9.4649	9.03005	9.20291	8.50467	8.80339	8.04267	9.01948	9.27873	8.60718	8.7641	8.62091	7.75565	8.0617	8.07033	8.42862	8.32465	8.70575	8.00572	8.04584	7.78199
Bhmt	13	93616891	93637961	-	0.0186176	Bhmt	ENSMUSG00000074768	betaine-homocysteine methyltransferase [Source:MGI Symbol;Acc:MGI:1339972]	gene	overlapping	0	9.66694	9.12737	9.06315	8.36855	8.71431	8.01905	9.28455	9.26123	8.60262	8.76455	8.74455	7.92572	7.90408	8.02221	8.35465	8.45945	8.81944	7.89192	8.02395	7.91934
Tfb2m	1	179528055	179546267	-	0.0340635	Tfb2m	ENSMUSG00000026492	transcription factor B2, mitochondrial [Source:MGI Symbol;Acc:MGI:107937]	gene	overlapping	0	8.33123	8.48904	8.39782	7.46097	8.29551	7.69662	7.85274	8.56562	7.52766	7.69499	7.59725	7.07892	7.10492	7.2177	7.3957	6.94954	6.98677	7.8633	7.35036	7.84828
Sod1	16	90220742	90226322	+	0.0196395	Sod1	ENSMUSG00000022982	superoxide dismutase 1, soluble [Source:MGI Symbol;Acc:MGI:98351]	gene	overlapping	0	7.15426	7.04575	7.03634	6.35327	6.61407	6.00829	6.54803	6.84707	6.55537	6.59189	6.31919	6.27237	6.27159	5.8483	6.23089	5.35597	5.84359	5.28941	6.20594	5.9486
Rrp8	7	105732207	105737376	-	0.0177078	Rrp8	ENSMUSG00000030888	ribosomal RNA processing 8, methyltransferase, homolog (yeast) [Source:MGI Symbol;Acc:MGI:1914251]	gene	overlapping	0	7.98035	7.64642	8.60225	7.63819	8.26447	7.72658	7.9124	8.42812	7.62486	7.80279	7.53716	6.85295	7.32058	7.29319	7.59269	7.38254	7.90857	6.26045	6.96273	7.18492
Tbrg1	9	37649182	37657312	-	0.000415764	Tbrg1	ENSMUSG00000011114	transforming growth factor beta regulated gene 1 [Source:MGI Symbol;Acc:MGI:1100877]	gene	overlapping	0	8.71124	8.19106	8.62189	7.76232	8.0291	7.55106	8.28588	8.52221	8.03846	8.15893	8.11991	7.47995	7.27499	7.15163	7.54082	7.27807	7.65485	7.62452	7.46395	7.3045
Zmat5	11	4704678	4737669	+	0.00129407	Zmat5	ENSMUSG00000009076	zinc finger, matrin type 5 [Source:MGI Symbol;Acc:MGI:1914428]	gene	overlapping	0	7.4009	6.99535	7.10055	6.77766	6.86352	6.30375	7.01308	7.54697	6.91622	7.12241	6.76947	6.39116	6.40972	6.46876	6.53246	6.23849	6.29339	5.69449	6.19563	5.98803
Katna1	10	7726000	7763150	+	0.0297589	Katna1	ENSMUSG00000019794	katanin p60 (ATPase-containing) subunit A1 [Source:MGI Symbol;Acc:MGI:1344353]	gene	overlapping	0	8.81542	7.96037	8.64942	7.71327	8.41118	7.63062	8.75325	8.28307	7.41494	7.60621	8.18803	7.13468	7.30849	7.39159	7.82881	7.34016	7.14425	7.48605	7.35169	7.40622
Kctd10	5	114363567	114380515	-	0.00777141	Kctd10	ENSMUSG00000001098	potassium channel tetramerisation domain containing 10 [Source:MGI Symbol;Acc:MGI:2141207]	gene	overlapping	0	8.78179	8.38905	8.0714	8.21495	8.3643	7.9628	8.31478	8.53319	8.27612	7.89812	7.63183	6.88029	7.74435	7.46123	7.64793	8.079	8.09747	7.53804	6.89242	7.37905
Prc1	7	80294450	80316259	+	0.0474075	Prc1	ENSMUSG00000038943	protein regulator of cytokinesis 1 [Source:MGI Symbol;Acc:MGI:1858961]	gene	overlapping	0	8.62388	8.56762	8.31101	8.44304	8.92825	8.12426	8.94021	8.46756	8.31564	8.22602	8.28996	7.52079	7.80507	7.58732	7.86848	8.27416	6.28766	7.86404	7.79773	7.93253
Ctsz	2	174427493	174439039	-	0.0395294	Ctsz	ENSMUSG00000016256	cathepsin Z [Source:MGI Symbol;Acc:MGI:1891190]	gene	overlapping	0	8.1358	7.97401	8.13327	7.67349	7.73887	7.11983	7.59019	8.18996	7.73574	7.9064	6.97686	7.01084	6.25107	7.15267	7.53618	7.53654	7.69224	6.40183	7.27612	6.82888
Abcf3	16	20548577	20561379	+	0.0365194	Abcf3	ENSMUSG00000003234	ATP-binding cassette, sub-family F (GCN20), member 3 [Source:MGI Symbol;Acc:MGI:1351656]	gene	overlapping	0	7.2466	6.29798	6.65694	7.34642	6.91929	7.50078	6.95864	7.05634	7.22419	6.85081	6.87295	6.08427	6.32277	6.26654	5.82805	6.64042	6.1331	5.7404	6.47556	6.50532
Nmd3	3	69721985	69749042	+	0.0031924	Nmd3	ENSMUSG00000027787	NMD3 homolog (S. cerevisiae) [Source:MGI Symbol;Acc:MGI:2140103]	gene	overlapping	0	9.20472	8.71572	8.85506	8.13379	8.55694	7.63477	8.88288	8.92359	8.10032	8.45228	8.34689	7.73742	7.76058	7.62751	7.94679	7.95931	7.82885	8.02107	7.69377	7.87849
Gtf3c2	5	31151142	31180144	-	0.001025	Gtf3c2	ENSMUSG00000029144	general transcription factor IIIC, polypeptide 2, beta [Source:MGI Symbol;Acc:MGI:1919002]	gene	overlapping	0	8.5845	8.49615	8.65694	7.90192	8.5907	8.25437	8.40957	8.47517	8.2756	7.92936	8.10768	7.15721	7.78617	7.30727	7.36253	8.05128	7.40225	7.59537	7.80502	7.70955
Frrs1	3	116878227	116903750	+	0.021497	Frrs1	ENSMUSG00000033386	ferric-chelate reductase 1 [Source:MGI Symbol;Acc:MGI:108076]	gene	overlapping	0	8.0305	7.78185	7.95325	7.86528	7.93406	7.33278	7.29909	8.44682	7.53289	7.86364	6.82757	6.59692	7.11379	7.31193	7.30477	7.57836	7.52922	6.45197	7.00888	7.0693
Eif2b3	4	117019402	117087306	+	0.00283903	Eif2b3	ENSMUSG00000028683	eukaryotic translation initiation factor 2B, subunit 3 [Source:MGI Symbol;Acc:MGI:1313286]	gene	overlapping	0	8.68016	8.51882	8.58233	8.04038	8.22392	7.79864	8.73133	8.71577	8.14147	8.31585	8.21627	6.80836	7.76702	7.9215	8.00639	7.68822	7.61418	7.10994	7.62134	7.6063
3110002H16Rik	18	12168717	12189997	+	0.00143181	3110002H16Rik	ENSMUSG00000024410	RIKEN cDNA 3110002H16 gene [Source:MGI Symbol;Acc:MGI:1916528]	gene	overlapping	0	9.23625	8.42426	8.96168	8.06404	8.51825	7.98288	8.79301	8.68066	8.03539	8.35088	8.00831	7.73197	7.68522	7.82827	7.9868	7.93723	7.88976	7.83108	7.73453	7.72713
Fdps	3	89093592	89101967	-	0.00817527	Fdps	ENSMUSG00000059743	farnesyl diphosphate synthetase [Source:MGI Symbol;Acc:MGI:104888]	gene	overlapping	0	8.75785	7.96493	8.23264	7.63257	7.848	7.11389	8.21518	8.10325	7.59179	7.8178	7.57481	7.18637	6.92079	6.99465	7.50422	7.46632	7.59224	6.90349	7.13602	7.18746
Ebna1bp2	4	118620799	118627776	+	0.00731453	Ebna1bp2	ENSMUSG00000028729	EBNA1 binding protein 2 [Source:MGI Symbol;Acc:MGI:1916322]	gene	overlapping	0	8.65013	8.3573	8.29627	7.53885	7.95404	7.21576	8.38004	8.42183	7.62812	7.99299	8.03908	7.20517	7.29518	7.21571	7.74201	7.41131	6.9123	7.36672	7.19858	7.11986
Heatr1	13	12395398	12438677	+	0.000520297	Heatr1	ENSMUSG00000050244	HEAT repeat containing 1 [Source:MGI Symbol;Acc:MGI:2442524]	gene	overlapping	0	8.95039	8.50635	9.0054	8.00821	8.75604	8.25167	8.48855	8.9989	8.41542	8.36358	8.49339	7.56588	7.67498	7.53086	8.02638	8.13126	7.74343	7.69282	8.00256	7.73815
Stk11	10	80115803	80130682	+	0.017231	Stk11	ENSMUSG00000003068	serine/threonine kinase 11 [Source:MGI Symbol;Acc:MGI:1341870]	gene	overlapping	0	8.60074	8.04575	8.29848	7.69991	8.27306	8.03248	8.29645	8.01413	7.86938	7.86534	7.0897	7.55589	7.72132	6.93788	7.89772	7.48081	7.36596	6.60692	7.54856	7.37161
Glul	1	153899944	153909723	+	0.000954663	Glul	ENSMUSG00000026473	glutamate-ammonia ligase (glutamine synthetase) [Source:MGI Symbol;Acc:MGI:95739]	gene	overlapping	0	8.93339	8.43334	8.42179	8.16573	8.55443	7.80233	8.81278	8.74061	8.19145	8.20534	8.11214	7.66281	7.63944	7.70398	7.8409	7.72664	8.15768	7.00907	7.59413	7.65058
Psmd4	3	95032694	95042614	-	0.0141409	Psmd4	ENSMUSG00000005625	proteasome (prosome, macropain) 26S subunit, non-ATPase, 4 [Source:MGI Symbol;Acc:MGI:1201670]	gene	overlapping	0	9.00971	8.34248	8.61299	7.77193	8.16252	7.47034	8.70908	8.62292	8.01433	8.18573	8.30172	7.45784	7.59126	7.41951	7.79968	7.74723	7.97522	6.87731	7.49791	7.12341
Rcc1	4	132331919	132353605	-	0.00795728	Rcc1	ENSMUSG00000028896	regulator of chromosome condensation 1 [Source:MGI Symbol;Acc:MGI:1913989]	gene	overlapping	0	9.10767	8.14155	8.58172	8.08167	8.35451	7.92348	8.77673	8.64939	8.21716	7.88056	8.10545	7.12016	7.49948	7.48866	7.73878	8.15591	8.06682	7.59448	7.26559	7.54749
Impdh1	6	29200434	29216364	-	0.00308697	Impdh1	ENSMUSG00000003500	inosine 5'-phosphate dehydrogenase 1 [Source:MGI Symbol;Acc:MGI:96567]	gene	overlapping	0	8.51574	7.67732	8.06706	7.9268	8.21631	7.77956	8.37256	8.16383	8.01558	7.27099	7.98661	6.61331	7.243	7.15785	7.44307	7.44038	7.41809	7.27945	7.06741	7.0957
Gm5096	18	87756286	87758143	+	0.0197999	Gm5096	ENSMUSG00000069324	predicted gene 5096 [Source:MGI Symbol;Acc:MGI:3643681]	gene	overlapping	0	8.87153	8.2752	8.2648	7.55601	7.88128	7.20951	8.45669	8.44759	7.79433	7.93423	7.90286	7.06599	7.05711	7.21272	7.50042	7.65553	8.01482	7.03034	7.17028	7.09299
Tbc1d9	8	83165352	83272934	+	0.0245868	Tbc1d9	ENSMUSG00000031709	TBC1 domain family, member 9 [Source:MGI Symbol;Acc:MGI:1918560]	gene	overlapping	0	8.04377	7.44237	8.3066	8.08218	8.23212	7.77486	8.03219	8.17322	8.02118	7.7439	7.62872	6.83146	7.80115	7.23842	7.84165	6.94093	6.24685	7.4391	7.07626	7.00734
Tomm7	5	23838944	23844161	-	0.0265402	Tomm7	ENSMUSG00000028998	translocase of outer mitochondrial membrane 7 homolog (yeast) [Source:MGI Symbol;Acc:MGI:1913419]	gene	overlapping	0	6.93553	6.74254	6.65	6.02492	5.86352	5.4928	6.7018	6.74502	6.12481	6.40335	6.26414	5.77034	5.82681	5.61172	6.0343	5.58153	4.88597	5.5436	5.55491	5.57428
Cyth2	7	45806637	45814581	-	0.00976275	Cyth2	ENSMUSG00000003269	cytohesin 2 [Source:MGI Symbol;Acc:MGI:1334255]	gene	overlapping	0	7.54027	7.98191	7.48946	7.08167	6.96695	6.83787	7.4233	7.15438	7.29986	7.07614	6.66408	6.70651	6.1512	6.01079	6.40387	7.03404	6.57821	6.6315	6.78157	6.68757
Tfpt	7	3620324	3629929	-	0.0159611	Tfpt	ENSMUSG00000006335	TCF3 (E2A) fusion partner [Source:MGI Symbol;Acc:MGI:1916964]	gene	overlapping	0	7.56991	6.87205	7.00766	6.99021	7.00132	6.76685	7.59305	7.08248	6.86731	6.70452	6.40529	6.80447	6.10619	6.7209	6.62101	6.30131	6.0909	5.98066	5.65506	6.38791
Mkrn2	6	115601938	115618670	+	0.00313776	Mkrn2	ENSMUSG00000000439	makorin, ring finger protein, 2 [Source:MGI Symbol;Acc:MGI:1914277]	gene	overlapping	0	7.65359	7.54343	7.40127	7.05252	7.69572	7.46569	7.90321	8.03487	7.6715	7.58675	7.36662	7.01308	7.07927	6.84187	6.94049	7.11168	5.97075	6.64017	6.77466	6.79149
Grn	11	102430315	102437048	+	0.0131633	Grn	ENSMUSG00000034708	granulin [Source:MGI Symbol;Acc:MGI:95832]	gene	overlapping	0	9.11585	8.49378	8.83734	8.28778	8.21694	7.77909	8.60586	8.84414	8.43559	8.54277	8.05074	7.53259	7.43521	7.2979	7.92566	8.3104	8.53891	7.32105	7.55664	7.69949
Frg1	8	41397457	41417118	-	0.041044	Frg1	ENSMUSG00000031590	FSHD region gene 1 [Source:MGI Symbol;Acc:MGI:893597]	gene	overlapping	0	7.10197	7.30878	7.06271	6.97031	6.63134	6.51998	7.26898	7.21925	6.71131	7.19185	7.04375	6.40492	4.97325	6.27038	6.71105	6.38526	5.92345	5.56562	6.51282	6.08393
Dync1li1	9	114688790	114724302	+	0.0249644	Dync1li1	ENSMUSG00000032435	dynein cytoplasmic 1 light intermediate chain 1 [Source:MGI Symbol;Acc:MGI:2135610]	gene	overlapping	0	6.86258	7.36509	7.38743	7.41591	7.81309	7.43389	7.50612	6.95332	7.3121	6.52458	6.56671	6.80187	6.96207	6.76372	6.48701	6.53654	5.89732	6.33287	6.61804	6.32003
Dph1	11	75177643	75191241	-	0.0316737	Dph1	ENSMUSG00000078789	DPH1 homolog (S. cerevisiae) [Source:MGI Symbol;Acc:MGI:2151233]	gene	overlapping	0	8.1007	7.25206	7.93147	7.29402	7.14859	7.23365	7.34905	7.9899	7.63301	7.59804	7.47446	7.16228	5.7638	7.16302	7.10869	6.21624	6.59224	6.73555	6.7068	6.83753
Hmgxb4	8	74993356	75031978	+	0.0260553	Hmgxb4	ENSMUSG00000034518	HMG box domain containing 4 [Source:MGI Symbol;Acc:MGI:1918073]	gene	overlapping	0	7.93268	7.96493	8.11154	7.50082	8.425	7.42253	7.41362	8.4668	7.84292	7.86023	7.65493	7.35972	7.12512	7.518	6.96141	7.42636	6.1803	6.72906	7.26136	7.20178
Atox1	11	55446641	55461239	-	0.0431209	Atox1	ENSMUSG00000018585	ATX1 (antioxidant protein 1) homolog 1 (yeast) [Source:MGI Symbol;Acc:MGI:1333855]	gene	overlapping	0	6.21647	6.18911	5.79549	5.75458	5.31703	5.02736	5.69115	6.37379	5.48326	6.21871	5.39434	5.39634	5.66725	4.71387	5.06555	4.61283	5.071	4.56562	5.29003	5.01117
Ptbp1	10	79854427	79864771	+	0.0225899	Ptbp1	ENSMUSG00000006498	polypyrimidine tract binding protein 1 [Source:MGI Symbol;Acc:MGI:97791]	gene	overlapping	0	10.2127	9.02569	9.3143	8.86438	9.25985	8.60626	9.63567	9.63146	9.01215	8.98675	9.02732	8.17337	7.99536	8.21322	8.62102	8.84371	9.23647	8.32536	8.45995	8.4142
Nrbp1	5	31240864	31251566	+	0.0047344	Nrbp1	ENSMUSG00000029148	nuclear receptor binding protein 1 [Source:MGI Symbol;Acc:MGI:2183436]	gene	overlapping	0	9.2688	8.45782	8.63191	8.2842	8.22897	8.02301	9.07428	8.44604	8.13976	7.85253	8.04259	7.45702	7.80819	7.67025	8.00101	7.95321	7.80094	7.75724	7.50925	7.45556
Tti2	8	31150316	31164702	+	0.0296174	Tti2	ENSMUSG00000031577	TELO2 interacting protein 2 [Source:MGI Symbol;Acc:MGI:2384576]	gene	overlapping	0	7.49272	7.54952	7.33212	6.22851	6.71656	6.72366	7.18039	7.54986	6.90145	7.21605	6.82214	6.59992	5.98711	6.42984	6.40591	6.12368	5.5829	6.50232	6.78453	6.31848
Ilf2	3	90476201	90488379	+	0.0076791	Ilf2	ENSMUSG00000001016	interleukin enhancer binding factor 2 [Source:MGI Symbol;Acc:MGI:1915031]	gene	overlapping	0	8.50332	7.92452	8.52784	7.77703	8.4822	7.77768	8.44565	8.44759	7.69271	7.89645	8.04609	7.38597	7.14627	7.49523	7.49086	7.25445	6.51579	7.55649	7.60919	7.4393
Eif3d	15	77958998	77970824	-	0.0226637	Eif3d	ENSMUSG00000016554	eukaryotic translation initiation factor 3, subunit D [Source:MGI Symbol;Acc:MGI:1933181]	gene	overlapping	0	9.10893	8.62063	8.95372	8.1323	8.13115	7.89737	8.74748	8.9803	8.43746	8.52888	8.57723	7.73674	7.11884	7.29507	7.93697	8.22589	8.46459	7.04218	7.74113	7.49441
Lsg1	16	30560494	30587592	-	0.00248774	Lsg1	ENSMUSG00000022538	large subunit GTPase 1 homolog (S. cerevisiae) [Source:MGI Symbol;Acc:MGI:107236]	gene	overlapping	0	8.46637	8.22093	8.39575	7.52679	8.50425	7.95701	8.59733	8.32157	7.83093	7.89229	7.95841	6.95582	7.32495	7.70185	7.93062	7.5839	7.02864	7.41301	7.22417	7.0169
Brd2	17	34112023	34122634	-	0.0136854	Brd2	ENSMUSG00000024335	bromodomain containing 2 [Source:MGI Symbol;Acc:MGI:99495]	gene	overlapping	0	9.0265	8.3275	8.27612	8.3174	8.73666	8.27645	8.8054	8.87553	8.50607	7.96391	8.20692	8.08694	7.34661	7.92028	7.88682	7.64497	6.83575	7.79425	7.72073	8.03442
Tfap2c	2	172549593	172558622	+	0.000620703	Tfap2c	ENSMUSG00000028640	transcription factor AP-2, gamma [Source:MGI Symbol;Acc:MGI:106032]	gene	overlapping	0	8.55702	8.66195	9.19855	8.30067	8.58677	8.27745	8.64225	8.83589	8.71707	8.4864	8.62404	7.56817	7.6508	7.19668	7.77074	8.21217	7.64927	7.69366	8.0339	8.04193
Ercc3	18	32240300	32270151	+	0.00164021	Ercc3	ENSMUSG00000024382	excision repair cross-complementing rodent repair deficiency, complementation group 3 [Source:MGI Symbol;Acc:MGI:95414]	gene	overlapping	0	7.77782	7.31237	7.95137	7.76296	7.95785	7.5439	7.72025	7.93578	7.57834	7.46748	7.27413	6.65994	6.55636	6.09758	7.24347	7.14096	7.18185	6.78958	6.90242	7.31228
Commd5	15	76899910	76901305	+	0.0121625	Commd5	ENSMUSG00000055041	COMM domain containing 5 [Source:MGI Symbol;Acc:MGI:1913648]	gene	overlapping	0	8.00361	6.72651	7.67072	6.97919	7.25274	6.99947	7.75517	7.5642	7.20573	7.55652	7.43763	6.55126	7.00629	6.64313	6.87732	6.08626	6.58524	6.7061	6.14753	5.97827
Snupn	9	56950878	56983206	+	0.00284278	Snupn	ENSMUSG00000055334	snurportin 1 [Source:MGI Symbol;Acc:MGI:1913319]	gene	overlapping	0	8.38848	8.20655	8.3227	7.44504	7.86108	7.30765	8.09614	8.22468	7.3805	7.64535	7.65646	7.15619	7.35626	7.41864	7.46277	6.97385	6.68462	7.0277	7.10645	6.67313
Pramef12	4	144391674	144408464	-	0.0485509	Pramef12	ENSMUSG00000028591	PRAME family member 12 [Source:MGI Symbol;Acc:MGI:1924882]	gene	overlapping	0	6.96928	5.97966	7.00222	6.39699	6.33354	6.08461	7.18039	7.03384	6.81238	6.02835	6.57642	5.59842	6.4342	5.73901	6.35623	5.32229	6.10075	5.19836	5.56867	5.10021
Slc39a4	15	76612385	76616852	-	0.0089431	Slc39a4	ENSMUSG00000063354	solute carrier family 39 (zinc transporter), member 4 [Source:MGI Symbol;Acc:MGI:1919277]	gene	overlapping	0	8.46834	7.55709	8.21158	7.79725	8.50633	7.76779	8.3303	8.00048	7.92355	7.86023	7.32304	6.89742	7.28063	7.46039	7.75085	7.76057	7.37681	6.48123	7.32491	7.05545
Rbm28	6	29123573	29165006	-	0.00192077	Rbm28	ENSMUSG00000029701	RNA binding motif protein 28 [Source:MGI Symbol;Acc:MGI:2655711]	gene	overlapping	0	8.97552	7.94544	8.9166	8.06509	8.56695	8.37433	8.79611	8.56277	7.98788	8.02531	7.90157	7.61848	8.03059	7.87438	7.92069	7.61283	7.51579	7.60869	7.56867	7.29746
Hdgfrp2	17	56079657	56100596	+	0.0235336	Hdgfrp2	ENSMUSG00000002833	hepatoma-derived growth factor, related protein 2 [Source:MGI Symbol;Acc:MGI:1194492]	gene	overlapping	0	7.04508	6.60025	7.52278	7.05987	7.55493	7.32188	6.90436	6.86572	6.86039	6.68346	6.50021	6.53259	6.32058	5.45534	6.53804	6.23447	5.86686	6.88609	6.08027	6.27133
Gfpt1	6	87042846	87092197	+	0.00549106	Gfpt1	ENSMUSG00000029992	glutamine fructose-6-phosphate transaminase 1 [Source:MGI Symbol;Acc:MGI:95698]	gene	overlapping	0	8.96161	8.00646	8.91323	8.30862	8.59756	8.26177	8.75963	8.7292	8.41305	8.02455	7.93342	7.76967	7.28512	7.62676	8.19542	7.62362	7.41809	7.99899	8.12636	7.44922
Atpaf2	11	60400626	60418457	-	0.0265402	Atpaf2	ENSMUSG00000042709	ATP synthase mitochondrial F1 complex assembly factor 2 [Source:MGI Symbol;Acc:MGI:2180561]	gene	overlapping	0	6.55331	6.80748	6.79129	6.67758	6.61792	6.40805	6.85751	7.08048	6.11785	6.63042	5.85975	6.31124	6.13386	5.24915	6.22629	6.14952	5.31611	5.16027	5.63121	6.42573
Pdcd11	19	47090766	47131143	+	0.00778778	Pdcd11	ENSMUSG00000025047	programmed cell death 11 [Source:MGI Symbol;Acc:MGI:1341788]	gene	overlapping	0	8.20235	7.64784	8.0531	7.42812	8.09977	7.85798	7.48316	7.97602	7.41211	7.12525	7.26815	6.83019	7.32931	6.93183	7.50422	7.28002	6.74028	6.9461	6.5305	6.22259
Crlf3	11	80046493	80080991	-	0.00591337	Crlf3	ENSMUSG00000017561	cytokine receptor-like factor 3 [Source:MGI Symbol;Acc:MGI:1860086]	gene	overlapping	0	8.25916	7.84508	7.79444	7.28599	7.87646	7.34676	7.73458	7.69637	7.36395	7.10379	6.78072	6.62069	7.03593	7.08891	7.20422	6.97866	6.35229	6.80045	6.74062	7.22836
Cdca5	19	6084983	6091777	+	0.00373429	Cdca5	ENSMUSG00000024791	cell division cycle associated 5 [Source:MGI Symbol;Acc:MGI:1915099]	gene	overlapping	0	8.41526	8.0479	8.01578	7.03347	8.29732	7.616	7.85394	8.32325	7.58844	7.45285	7.10097	7.25918	7.38899	6.84573	7.17825	7.26138	7.54373	7.06168	6.86015	6.92848
Cdc45	16	18780447	18811987	-	6.54231e-05	Cdc45	ENSMUSG00000000028	cell division cycle 45 homolog (S. cerevisiae) [Source:MGI Symbol;Acc:MGI:1338073]	gene	overlapping	0	8.90752	8.51182	8.91419	8.13279	8.59462	7.82066	8.78176	8.77615	8.05069	8.2581	8.23684	7.61405	7.77023	7.7569	7.99493	7.84206	7.43635	7.63584	7.55664	7.52354
Cdc20	4	118432901	118437352	-	0.0049452	Cdc20	ENSMUSG00000006398	cell division cycle 20 homolog (S. cerevisiae) [Source:MGI Symbol;Acc:MGI:1859866]	gene	overlapping	0	9.4644	8.99814	9.01037	8.25251	8.6437	7.86462	9.17896	9.02713	8.35855	8.5078	8.7104	7.43624	7.91572	7.7404	8.2711	8.06322	8.33848	8.02373	7.73555	7.66342
Rqcd1	1	74506058	74530844	+	0.0212331	Rqcd1	ENSMUSG00000026174	rcd1 (required for cell differentiation) homolog 1 (S. pombe) [Source:MGI Symbol;Acc:MGI:1928902]	gene	overlapping	0	7.9284	7.53271	7.13078	7.70058	7.50789	7.73579	8.06039	7.8258	7.55537	7.49632	6.21937	6.93938	6.69285	6.3082	7.0224	7.30993	7.33848	7.00504	7.19637	6.48342
Smarca4	9	21616169	21704230	+	0.0019428	Smarca4	ENSMUSG00000032187	SWI/SNF related, matrix associated, actin dependent regulator of chromatin, subfamily a, member 4 [Source:MGI Symbol;Acc:MGI:88192]	gene	overlapping	0	9.07381	8.46106	9.45171	8.74583	9.32265	8.88654	9.41766	9.38837	8.89672	8.10451	8.64881	7.85169	8.15305	8.37253	8.28389	8.45945	8.46268	8.17586	8.19007	7.82507
Ddx18	1	121553835	121567989	-	0.000306632	Ddx18	ENSMUSG00000001674	DEAD (Asp-Glu-Ala-Asp) box polypeptide 18 [Source:MGI Symbol;Acc:MGI:1914192]	gene	overlapping	0	9.28564	8.43005	8.99357	8.28599	8.47584	8.06821	8.98557	9.06796	8.47195	8.49796	8.46578	7.73334	7.86334	7.49031	7.89554	8.1345	8.04913	7.67013	7.94393	7.87166
Lclat1	17	73107985	73243368	+	0.00727209	Lclat1	ENSMUSG00000054469	lysocardiolipin acyltransferase 1 [Source:MGI Symbol;Acc:MGI:2684937]	gene	overlapping	0	8.12711	8.77991	9.28398	8.55453	9.09459	8.28043	8.72547	9.15722	8.63463	8.7069	7.96212	7.79209	8.11884	7.65492	8.40845	8.36702	7.28478	8.22744	8.14639	7.69235
Aamp	1	74279840	74284738	-	0.000717123	Aamp	ENSMUSG00000006299	angio-associated migratory protein [Source:MGI Symbol;Acc:MGI:107809]	gene	overlapping	0	8.73187	7.91865	8.00313	7.80164	7.96997	7.68015	8.32601	8.25063	7.90078	7.71965	7.79049	7.18637	6.97186	7.1222	7.73149	7.38798	7.29625	6.76757	7.36555	6.91423
Wdr53	16	32247227	32257083	+	0.0318768	Wdr53	ENSMUSG00000022787	WD repeat domain 53 [Source:MGI Symbol;Acc:MGI:1916230]	gene	overlapping	0	7.52333	6.84508	7.2037	6.00767	6.61985	6.61652	7.11817	6.95114	6.33326	6.33132	6.07607	6.2873	6.56747	5.94749	6.4696	6.00367	5.54973	5.95308	5.8214	5.31384
Yme1l1	2	23156369	23199260	+	0.000544957	Yme1l1	ENSMUSG00000026775	YME1-like 1 (S. cerevisiae) [Source:MGI Symbol;Acc:MGI:1351651]	gene	overlapping	0	7.54401	8.48507	8.32051	8.27657	8.08312	7.74157	8.27523	8.44527	7.86316	7.80811	7.58286	7.42615	7.21383	7.12008	6.75485	7.42107	7.56523	7.09866	7.68801	7.28009
Cs	10	128337832	128362479	+	0.000994696	Cs	ENSMUSG00000005683	citrate synthase [Source:MGI Symbol;Acc:MGI:88529]	gene	overlapping	0	9.11145	8.47871	8.74535	7.8949	8.44414	8.02459	8.50916	8.55489	8.23815	8.23526	7.89512	7.36677	7.35839	7.6483	7.48509	7.77447	7.48979	7.90061	7.95051	7.81524
Larp7	3	127536954	127553348	-	5.51071e-05	Larp7	ENSMUSG00000027968	La ribonucleoprotein domain family, member 7 [Source:MGI Symbol;Acc:MGI:107634]	gene	overlapping	0	8.34843	7.77926	8.16851	7.70393	8.03921	7.57447	7.96307	8.07448	7.40546	7.66306	7.8624	6.83528	6.7638	7.09758	7.38542	7.19469	7.12186	6.93627	6.93996	6.62393
BC030867	11	102248882	102265187	+	0.0152287	BC030867	ENSMUSG00000034773	cDNA sequence BC030867 [Source:MGI Symbol;Acc:MGI:2387601]	gene	overlapping	0	8.22814	7.58551	8.12662	7.85265	7.50373	7.5356	8.22905	8.2001	7.94728	7.77138	7.36662	7.25539	7.08186	6.5515	7.25255	6.99538	8.21774	6.39775	6.80405	6.52555
Las1l	X	95935335	95956962	-	0.00837333	Las1l	ENSMUSG00000057421	LAS1-like (S. cerevisiae) [Source:MGI Symbol;Acc:MGI:1923380]	gene	overlapping	0	7.58086	7.27978	7.69115	6.84599	7.62369	7.38852	7.56417	7.23009	6.27612	6.56702	7.2399	6.37553	6.45828	6.19163	6.48701	5.85978	6.50347	6.49277	6.3497	6.54551
Leo1	9	75441524	75466432	+	0.00254065	Leo1	ENSMUSG00000042487	Leo1, Paf1/RNA polymerase II complex component, homolog (S. cerevisiae) [Source:MGI Symbol;Acc:MGI:2685031]	gene	overlapping	0	8.88042	8.13144	8.62956	8.12031	7.87967	7.86329	8.59876	8.17322	7.99422	7.84995	7.87295	7.43875	7.48588	7.34778	7.58732	7.72449	7.86974	6.53804	7.01727	7.38349
Vps16	2	130424339	130444269	+	0.00955001	Vps16	ENSMUSG00000027411	vacuolar protein sorting 16 (yeast) [Source:MGI Symbol;Acc:MGI:2136772]	gene	overlapping	0	7.79674	6.9385	7.87603	7.21072	7.32885	7.14841	7.21797	7.11985	7.20244	7.04496	6.83569	6.27424	6.202	6.2177	6.25368	6.70719	7.33987	5.7404	6.42728	6.73584
Stk19	17	34823993	34836945	-	0.0480964	Stk19	ENSMUSG00000061207	serine/threonine kinase 19 [Source:MGI Symbol;Acc:MGI:1860085]	gene	overlapping	0	6.66736	6.93153	7.09715	6.5759	6.73799	6.4616	6.85751	7.2796	6.65799	6.65817	6.3722	6.41685	5.48392	6.21571	6.49469	5.75987	6.27322	4.06555	5.9877	5.99578
Btg1	10	96617001	96622813	+	0.0452676	Btg1	ENSMUSG00000036478	B cell translocation gene 1, anti-proliferative [Source:MGI Symbol;Acc:MGI:88215]	gene	overlapping	0	8.33123	8.42922	7.61121	7.65629	8.17042	7.19483	8.06864	8.45377	7.30497	7.63541	7.10545	7.30208	7.54047	7.76916	7.03693	6.87663	6.67806	7.54729	6.89425	6.32003
Ddx31	2	28840406	28905571	+	0.00300885	Ddx31	ENSMUSG00000026806	DEAD/H (Asp-Glu-Ala-Asp/His) box polypeptide 31 [Source:MGI Symbol;Acc:MGI:2682639]	gene	overlapping	0	7.4555	7.54343	7.89475	7.08476	7.97449	7.16141	7.18419	8.17695	7.3863	7.12241	6.88603	6.40149	6.6324	6.51962	6.59626	7.05242	7.26009	6.42411	7.00045	6.58974
Mina	16	59471775	59492461	+	0.00133671	Mina	ENSMUSG00000022724	myc induced nuclear antigen [Source:MGI Symbol;Acc:MGI:1914264]	gene	overlapping	0	8.17489	8.16255	7.98394	7.41673	8.14057	7.70996	8.02691	8.22829	7.37856	7.63641	7.81258	7.0928	7.06366	7.31564	7.41908	6.95076	6.35777	7.3318	6.6859	6.74622
Wdr46	17	33940660	33949695	+	0.00465062	Wdr46	ENSMUSG00000024312	WD repeat domain 46 [Source:MGI Symbol;Acc:MGI:1931871]	gene	overlapping	0	9.21648	8.10482	8.72403	8.10061	8.27061	7.94786	8.41605	8.61261	8.10091	7.89145	8.19751	7.44375	7.54422	7.53246	7.61751	7.75567	8.14742	6.94889	7.33367	7.04146
Prdx3	19	60864051	60874556	-	0.0318768	Prdx3	ENSMUSG00000024997	peroxiredoxin 3 [Source:MGI Symbol;Acc:MGI:88034]	gene	overlapping	0	8.23278	7.62207	7.81941	7.27251	7.16845	7.24795	7.45669	8.13049	7.06822	7.75587	6.96705	6.36325	6.34231	7.10404	6.79114	6.96902	6.07767	7.44802	7.09936	6.72071
Gpn3	5	122371876	122382902	+	0.00541668	Gpn3	ENSMUSG00000029464	GPN-loop GTPase 3 [Source:MGI Symbol;Acc:MGI:1289326]	gene	overlapping	0	8.5845	8.13751	8.01488	7.56783	7.85046	7.38175	8.17467	8.23816	7.67388	8.11956	7.81395	6.9767	6.99536	7.13278	7.17944	7.17909	6.31329	7.69699	7.04461	7.38644
Zc3h8	2	128926268	128944077	-	0.0301402	Zc3h8	ENSMUSG00000027387	zinc finger CCCH type containing 8 [Source:MGI Symbol;Acc:MGI:1930128]	gene	overlapping	0	7.29842	7.80239	7.51133	7.23686	7.09839	6.37494	7.39897	7.08844	6.65319	6.82482	6.14733	6.37378	7.09472	6.53565	6.07326	6.47486	5.71272	6.71599	5.92489	6.35513
Terf1	1	15805658	15843428	+	0.022361	Terf1	ENSMUSG00000025925	telomeric repeat binding factor 1 [Source:MGI Symbol;Acc:MGI:109634]	gene	overlapping	0	7.77624	7.68564	7.77011	7.37108	7.24652	7.11241	7.70445	7.79086	7.43932	7.12525	7.38332	6.1264	5.31839	6.45703	6.52498	7.21523	6.83181	6.39979	6.93377	7.09751
Abcf1	17	35956819	35969761	-	0.0261237	Abcf1	ENSMUSG00000038762	ATP-binding cassette, sub-family F (GCN20), member 1 [Source:MGI Symbol;Acc:MGI:1351658]	gene	overlapping	0	9.29398	8.25392	7.74969	8.17204	8.52648	8.22576	9.22905	8.34418	7.91756	7.67475	8.246	7.63536	7.45529	7.62452	7.69699	7.63434	8.10809	7.47543	7.12753	7.01308
Surf6	2	26888628	26902879	-	0.0253276	Surf6	ENSMUSG00000036160	surfeit gene 6 [Source:MGI Symbol;Acc:MGI:98447]	gene	overlapping	0	7.3947	6.34073	7.30292	6.51768	7.71025	7.14478	6.86937	7.17509	6.85063	6.47196	6.97196	6.35796	6.50334	6.27038	6.56562	5.51682	5.94911	5.42812	6.02311	6.16528
P4hb	11	120560298	120573253	-	9.58123e-06	P4hb	ENSMUSG00000025130	prolyl 4-hydroxylase, beta polypeptide [Source:MGI Symbol;Acc:MGI:97464]	gene	overlapping	0	9.21354	9.2394	9.18421	8.52679	9.00831	8.15312	9.04322	9.09191	8.679	8.65719	8.35443	7.83972	8.08573	8.16766	8.4793	8.3104	8.10483	7.68614	8.06093	7.93203
Eif2b4	5	31187558	31193430	-	0.000410429	Eif2b4	ENSMUSG00000029145	eukaryotic translation initiation factor 2B, subunit 4 delta [Source:MGI Symbol;Acc:MGI:95300]	gene	overlapping	0	8.72941	8.10171	8.3227	7.92967	7.92163	7.46277	8.35412	8.46068	7.868	7.94392	7.67768	6.94292	7.38481	7.41171	7.31781	7.34016	7.99383	6.83411	7.08347	7.15145
Orc6	8	85299632	85308278	+	0.00918633	Orc6	ENSMUSG00000031697	origin recognition complex, subunit 6 [Source:MGI Symbol;Acc:MGI:1929285]	gene	overlapping	0	8.38952	8.26136	8.16039	7.5441	7.84964	7.18354	8.20866	8.23547	7.46511	7.96232	8.03673	6.88643	6.96907	6.88129	7.14694	7.13018	6.09419	7.50232	7.10802	7.23738
Bcat1	6	144993835	145076184	-	0.0012892	Bcat1	ENSMUSG00000030268	branched chain aminotransferase 1, cytosolic [Source:MGI Symbol;Acc:MGI:104861]	gene	overlapping	0	9.88227	9.37326	9.21902	8.60128	9.0939	8.40076	9.50954	9.41433	8.88175	8.9167	8.97992	8.01421	8.05973	8.14066	8.42812	8.54671	8.8543	8.00236	8.31372	8.16614
Fbxl20	11	98082556	98150403	-	0.0113779	Fbxl20	ENSMUSG00000020883	F-box and leucine-rich repeat protein 20 [Source:MGI Symbol;Acc:MGI:1919444]	gene	overlapping	0	9.1857	8.69459	8.93195	8.18313	8.75429	8.1743	8.87408	8.88413	8.44904	8.63142	8.39526	7.36413	7.41792	7.65272	7.36567	8.44474	7.24241	8.19307	8.01098	8.29313
Smyd5	6	85431989	85446435	+	0.00399566	Smyd5	ENSMUSG00000033706	SET and MYND domain containing 5 [Source:MGI Symbol;Acc:MGI:108048]	gene	overlapping	0	9.03184	8.48428	8.54789	8.07547	8.30032	8.18212	9.03219	8.71898	8.39639	8.0412	8.16138	7.29008	7.05052	7.44943	7.88609	8.0236	8.40225	7.43012	7.71867	7.15059
Krr1	10	111972664	111988432	+	0.000165435	Krr1	ENSMUSG00000063334	KRR1, small subunit (SSU) processome component, homolog (yeast) [Source:MGI Symbol;Acc:MGI:1289274]	gene	overlapping	0	8.99613	9.08295	9.01173	8.35668	8.64038	8.23468	8.79051	9.05481	8.50252	8.54966	8.26414	7.97035	7.55357	8.20071	7.5137	7.99181	7.50594	8.0277	8.12209	8.08711
Mcm3	1	20802974	20820278	-	8.56711e-05	Mcm3	ENSMUSG00000041859	minichromosome maintenance deficient 3 (S. cerevisiae) [Source:MGI Symbol;Acc:MGI:101845]	gene	overlapping	0	8.57995	8.03711	8.62248	7.93024	8.25336	7.8311	8.15447	8.11499	7.59846	7.84047	7.88343	7.49208	6.72297	7.29413	7.15544	7.3439	7.39293	7.10243	7.31474	7.28009
Rpf1	3	146506348	146521423	-	0.000701592	Rpf1	ENSMUSG00000028187	ribosome production factor 1 homolog (S. cerevisiae) [Source:MGI Symbol;Acc:MGI:1917535]	gene	overlapping	0	8.09435	7.88053	7.79759	7.02063	7.50164	7.05781	7.7018	7.82104	7.4026	7.52351	7.46403	6.67421	6.19006	6.60869	6.74201	7.0467	6.42986	6.64017	6.82044	7.07754
2410001C21Rik	2	172440556	172469908	+	0.000820558	2410001C21Rik	ENSMUSG00000027502	RIKEN cDNA 2410001C21 gene [Source:MGI Symbol;Acc:MGI:1913654]	gene	overlapping	0	9.02917	8.065	8.61299	7.96082	8.61117	7.97349	8.83169	8.6681	8.20518	8.24117	8.01903	7.72513	7.98573	7.65051	7.80045	7.77931	7.11215	7.27723	7.60863	7.31539
Phrf1	7	141228784	141262750	+	4.56707e-05	Phrf1	ENSMUSG00000038611	PHD and ring finger domains 1 [Source:MGI Symbol;Acc:MGI:2141847]	gene	overlapping	0	8.08411	7.93386	8.28436	7.41018	7.96695	8.00629	7.71632	8.13241	7.8974	7.53744	7.56833	7.1643	7.17319	6.80399	7.50517	7.29939	7.16474	6.60692	6.90151	6.48066
Dbt	3	116513070	116549976	+	0.0479497	Dbt	ENSMUSG00000000340	dihydrolipoamide branched chain transacylase E2 [Source:MGI Symbol;Acc:MGI:105386]	gene	overlapping	0	7.01847	5.9009	6.78497	7.37108	7.41007	7.38975	7.20493	6.68592	6.56733	6.6699	6.1689	6.0276	5.70799	6.36133	5.93062	6.13234	5.54012	6.38748	6.23356	6.69473
Hnrnpa2b1	6	51460434	51469894	-	0.0078857	Hnrnpa2b1	ENSMUSG00000004980	heterogeneous nuclear ribonucleoprotein A2/B1 [Source:MGI Symbol;Acc:MGI:104819]	gene	overlapping	0	9.58993	9.25718	9.20764	8.37445	8.85741	8.17395	9.1467	9.08993	8.60096	8.47363	8.68144	7.86668	7.96277	7.89751	8.06103	7.76893	7.49353	8.55373	8.49491	8.03724
Zfp330	8	82763621	82774160	-	0.014178	Zfp330	ENSMUSG00000031711	zinc finger protein 330 [Source:MGI Symbol;Acc:MGI:1353574]	gene	overlapping	0	7.71952	7.91276	8.45071	7.42406	7.76607	7.37122	8.03641	8.29344	7.55794	7.56493	7.60043	7.21105	5.90189	7.11689	7.48605	6.1345	6.81994	7.38645	6.92489	6.93657
Supt7l	5	31514569	31527807	-	0.00463057	Supt7l	ENSMUSG00000053134	suppressor of Ty 7 (S. cerevisiae)-like [Source:MGI Symbol;Acc:MGI:1919445]	gene	overlapping	0	6.87747	6.82766	7.70014	6.85205	7.2614	7.49452	7.63948	7.26913	7.02056	7.12809	6.56671	6.20909	6.22557	6.87878	6.15785	6.78893	5.87836	6.43412	6.65075	6.14624
Nop16	13	54584185	54590090	-	0.000223077	Nop16	ENSMUSG00000025869	NOP16 nucleolar protein homolog (yeast) [Source:MGI Symbol;Acc:MGI:107862]	gene	overlapping	0	7.83538	7.5419	7.68438	7.27702	7.81981	6.90813	7.78426	7.73745	7.23172	7.47753	7.06691	6.79405	6.202	6.95824	7.13471	6.99419	6.39026	6.41605	6.69952	6.44001
Hinfp	9	44295673	44305671	-	0.00276918	Hinfp	ENSMUSG00000032119	histone H4 transcription factor [Source:MGI Symbol;Acc:MGI:2429620]	gene	overlapping	0	7.22814	7.32839	7.38325	6.88431	7.68749	7.29131	7.31824	7.40281	6.59429	6.87972	6.00591	6.75565	6.66035	6.22957	6.84165	6.57519	6.0876	6.08855	6.22199	6.39819
Plekhg5	4	152072498	152115400	+	0.0158569	Plekhg5	ENSMUSG00000039713	pleckstrin homology domain containing, family G (with RhoGef domain) member 5 [Source:MGI Symbol;Acc:MGI:2652860]	gene	overlapping	0	6.37175	5.84261	6.92956	6.14221	6.43979	6.48363	6.51822	7.24974	6.31716	6.59395	6.44825	4.9382	5.46027	5.49195	5.98612	5.76823	5.09747	5.37506	6.12598	5.84721
Dnttip2	3	122274414	122285269	+	9.9851e-05	Dnttip2	ENSMUSG00000039756	deoxynucleotidyltransferase, terminal, interacting protein 2 [Source:MGI Symbol;Acc:MGI:1923173]	gene	overlapping	0	9.44154	9.06818	9.29404	8.45661	8.87364	8.25841	9.22675	9.29258	8.60842	8.58417	8.84241	7.99557	8.06432	7.66297	8.16208	8.39835	8.21245	8.12979	7.87268	7.73989
Pdia3	2	121413775	121438687	+	0.0225938	Pdia3	ENSMUSG00000027248	protein disulfide isomerase associated 3 [Source:MGI Symbol;Acc:MGI:95834]	gene	overlapping	0	8.3495	7.44073	7.95137	6.95801	7.40895	6.62071	7.5436	7.39481	7.00557	6.98987	6.94222	6.35441	6.69115	6.21969	6.33928	6.75567	6.73186	6.16268	7.19415	6.6063
Eef1d	15	75894796	75909556	-	0.00416465	Eef1d	ENSMUSG00000055762	eukaryotic translation elongation factor 1 delta (guanine nucleotide exchange protein) [Source:MGI Symbol;Acc:MGI:1913906]	gene	overlapping	0	8.66822	7.95005	8.27235	7.77448	7.95556	7.12278	8.2618	8.19089	7.57496	7.60213	7.70303	6.9047	6.23953	7.20171	7.59805	7.06831	7.528	7.0277	7.04543	6.91218
Elac2	11	64979038	65002069	+	0.0172179	Elac2	ENSMUSG00000020549	elaC homolog 2 (E. coli) [Source:MGI Symbol;Acc:MGI:1890496]	gene	overlapping	0	7.86557	6.88895	8.09118	6.86408	7.3763	7.34992	7.84195	7.24619	7.14204	6.78582	6.9144	6.42868	5.91645	5.67677	7.06555	6.70574	6.73397	6.68614	6.80308	6.42429
Ccdc25	14	65837302	65866604	+	1.68139e-05	Ccdc25	ENSMUSG00000022035	coiled-coil domain containing 25 [Source:MGI Symbol;Acc:MGI:1914429]	gene	overlapping	0	8.61946	8.51804	8.4998	8.14911	8.60826	7.86903	8.61011	8.62907	8.0519	8.0842	8.13861	7.41004	7.78696	7.33776	7.74925	7.63966	6.99735	7.78332	7.04132	7.39453
Slc5a6	5	31036036	31048924	-	2.10378e-05	Slc5a6	ENSMUSG00000006641	solute carrier family 5 (sodium-dependent vitamin transporter), member 6 [Source:MGI Symbol;Acc:MGI:2660847]	gene	overlapping	0	9.92947	9.54951	9.49141	8.99048	9.37773	8.58791	9.61469	9.62189	9.13947	9.02036	9.12874	8.30116	8.42099	8.36403	8.56926	8.62247	8.97299	8.42712	8.24574	8.20513
Psap	10	60277627	60302597	+	0.0440523	Psap	ENSMUSG00000004207	prosaposin [Source:MGI Symbol;Acc:MGI:97783]	gene	overlapping	0	8.7187	7.8339	8.65867	8.08218	8.09078	7.9698	8.37589	8.09932	8.42578	8.26069	7.25005	7.1264	7.60929	7.15059	7.74362	8.01718	7.8992	5.49851	7.67481	7.33921
Wdr75	1	45795166	45823619	+	0.0002477	Wdr75	ENSMUSG00000025995	WD repeat domain 75 [Source:MGI Symbol;Acc:MGI:1920924]	gene	overlapping	0	9.50954	8.3486	8.92141	8.57187	8.78034	8.25167	8.96914	8.97172	8.37662	8.51432	8.48137	7.69186	7.62	7.63497	7.88463	8.17491	7.8387	7.91997	7.95925	8.01069
Kars	8	111993440	112011323	-	0.000784951	Kars	ENSMUSG00000031948	lysyl-tRNA synthetase [Source:MGI Symbol;Acc:MGI:1934754]	gene	overlapping	0	9.57813	8.72785	9.09927	8.22432	8.6342	8.02222	8.96251	9.12614	8.55021	8.5581	8.52132	7.67988	7.71633	7.57651	8.08474	8.07844	8.3936	7.99155	7.86201	7.64134
Zc3hc1	6	30366380	30391028	-	0.00276918	Zc3hc1	ENSMUSG00000039130	zinc finger, C3HC type 1 [Source:MGI Symbol;Acc:MGI:1916023]	gene	overlapping	0	9.19464	8.52887	8.62897	8.21964	8.37117	7.83607	8.78176	8.68395	8.22149	8.29391	8.24802	7.63024	7.18286	7.56328	7.8212	8.01894	8.28406	6.82957	7.47799	7.17385
Rrp12	19	41862852	41896153	-	0.0164214	Rrp12	ENSMUSG00000035049	ribosomal RNA processing 12 homolog (S. cerevisiae) [Source:MGI Symbol;Acc:MGI:2147437]	gene	overlapping	0	8.20472	7.72382	7.34364	7.47281	7.93174	7.59219	7.92949	7.22107	6.98406	6.91464	7.45177	6.61183	6.45629	6.60109	7.37921	6.97143	7.12669	5.98339	5.83475	6.20931
Adsl	15	80948490	80970947	+	8.47417e-07	Adsl	ENSMUSG00000022407	adenylosuccinate lyase [Source:MGI Symbol;Acc:MGI:103202]	gene	overlapping	0	7.54774	7.79344	7.90547	7.50082	7.47424	7.57663	7.50612	7.9247	7.61912	7.76956	7.29781	6.66424	6.54703	6.03129	7.08347	6.7944	7.10075	7.03034	6.7325	6.7679
Serhl	15	83089506	83116674	+	0.0411257	Serhl	ENSMUSG00000058586	serine hydrolase-like [Source:MGI Symbol;Acc:MGI:1890404]	gene	overlapping	0	6.8262	6.06287	6.38603	6.67485	6.59658	6.37618	7.1082	6.57981	5.80519	5.96629	5.24802	5.21301	6.35091	5.83541	6.31565	5.05698	5.63353	5.78802	5.39417	4.98413
Supt5h	7	28314898	28338719	-	0.000121885	Supt5h	ENSMUSG00000003435	suppressor of Ty 5 homolog (S. cerevisiae) [Source:MGI Symbol;Acc:MGI:1202400]	gene	overlapping	0	8.92911	7.88173	8.78127	8.03826	8.04495	8.02103	8.68446	8.52441	8.32825	8.02835	8.04025	7.45702	7.24646	7.31006	7.89699	7.49347	7.77555	7.27723	7.49671	7.12429
Srfbp1	18	52465693	52490738	+	0.0013844	Srfbp1	ENSMUSG00000024528	serum response factor binding protein 1 [Source:MGI Symbol;Acc:MGI:1914472]	gene	overlapping	0	8.01443	7.70486	8.33212	7.27522	7.7556	7.15781	7.84916	7.97602	7.2937	7.34724	6.73808	7.04418	6.62887	6.79469	7.14328	6.68381	6.45311	7.28278	6.98855	6.90808
Ddx49	8	70292866	70302489	-	0.0144449	Ddx49	ENSMUSG00000057788	DEAD (Asp-Glu-Ala-Asp) box polypeptide 49 [Source:MGI Symbol;Acc:MGI:2136689]	gene	overlapping	0	8.91619	7.48587	8.49464	7.06404	7.94715	7.67613	7.99155	8.34418	7.97576	7.96629	7.46752	6.979	7.00765	7.46793	7.275	7.4825	7.70628	6.44406	7.28934	6.86638
Gtf3c1	7	125640955	125707780	-	0.00317634	Gtf3c1	ENSMUSG00000032777	general transcription factor III C 1 [Source:MGI Symbol;Acc:MGI:107887]	gene	overlapping	0	8.06343	7.45863	7.76583	7.69924	8.04208	7.39588	8.30608	7.85759	7.33626	7.24247	6.75813	7.00746	7.13511	6.55308	7.28831	7.38617	6.57114	6.40997	7.01894	6.77693
Cope	8	70302518	70312993	+	0.00271666	Cope	ENSMUSG00000055681	coatomer protein complex, subunit epsilon [Source:MGI Symbol;Acc:MGI:1891702]	gene	overlapping	0	7.77146	7.02187	7.45669	7.24884	6.68565	6.74781	7.53022	7.5	7.24348	7.36779	6.71187	6.55589	6.21854	6.19567	6.89772	6.19365	6.69766	5.52123	6.75373	6.40112
Zbtb17	4	141444654	141467930	+	0.000196201	Zbtb17	ENSMUSG00000006215	zinc finger and BTB domain containing 17 [Source:MGI Symbol;Acc:MGI:107410]	gene	overlapping	0	8.82236	8.45458	8.79339	8.12481	8.51049	8.14659	8.91126	8.57202	8.0087	8.01921	7.59247	7.02092	7.64207	7.60033	8.0084	7.88755	7.42595	7.87951	7.63121	7.46398
Sf3a1	11	4160350	4182541	+	0.00742847	Sf3a1	ENSMUSG00000002129	splicing factor 3a, subunit 1 [Source:MGI Symbol;Acc:MGI:1914715]	gene	overlapping	0	8.55794	7.37026	7.48167	7.65629	7.99466	7.991	7.31478	8.05532	7.99232	7.21071	7.25812	7.10127	6.43218	6.84058	6.72417	6.88947	7.60152	6.65566	6.98342	7.01213
Gm20708	11	117809668	117839904	+	0.0145045	Gm20708	ENSMUSG00000093485	predicted gene 20708 [Source:MGI Symbol;Acc:MGI:5313155]	gene	overlapping	0	7.20235	6.39582	7.61478	7.523	6.43324	6.69016	7.22536	7.1844	6.52064	7.10811	6.45879	6.40492	5.98711	5.26846	6.88171	6.2936	6.06766	5.79735	6.04132	6.35663
Nup155	15	8109313	8159857	+	0.0381397	Nup155	ENSMUSG00000022142	nucleoporin 155 [Source:MGI Symbol;Acc:MGI:2181182]	gene	overlapping	0	6.76667	7.84385	8.89963	7.84902	8.19774	7.7134	8.0427	8.56134	7.80519	8.00307	7.50021	6.1097	7.14256	7.34414	6.95029	7.43076	7.15847	6.89627	7.87638	7.12694
Prmt5	14	54507187	54517525	-	0.0031924	Prmt5	ENSMUSG00000023110	protein arginine N-methyltransferase 5 [Source:MGI Symbol;Acc:MGI:1351645]	gene	overlapping	0	9.14075	7.9774	8.77117	8.19031	8.24403	8.12168	8.6374	8.63724	8.36639	8.09294	8.21004	7.34106	7.4493	7.11369	7.13839	7.76684	8.42268	7.26494	7.65989	7.05173
Anapc7	5	122421693	122444912	+	0.00714168	Anapc7	ENSMUSG00000029466	anaphase promoting complex subunit 7 [Source:MGI Symbol;Acc:MGI:1929711]	gene	overlapping	0	9.11522	7.49062	8.29032	7.56341	8.41562	7.98735	8.36085	8.68657	7.56903	7.76956	7.81532	7.41345	7.68011	7.11582	7.68362	7.30227	7.22751	7.22398	7.08985	6.88634
Eif3c	7	126546912	126566366	-	0.000284562	Eif3c	ENSMUSG00000030738	eukaryotic translation initiation factor 3, subunit C [Source:MGI Symbol;Acc:MGI:1926966]	gene	overlapping	0	10.1215	9.35035	9.48134	8.81874	9.24403	8.57123	9.72906	9.56313	8.99422	8.9992	9.06	8.21496	8.34554	8.21472	8.53989	8.58113	8.89826	8.49708	8.23607	8.17299
Farsa	8	84856989	84869257	+	0.010684	Farsa	ENSMUSG00000003808	phenylalanyl-tRNA synthetase, alpha subunit [Source:MGI Symbol;Acc:MGI:1913840]	gene	overlapping	0	8.70123	7.72247	7.4218	7.72454	7.3989	7.57447	7.98829	7.83293	7.56392	6.56073	7.19646	6.80057	6.66897	6.68829	7.15301	7.19572	7.30764	6.7061	6.57437	6.24554
Ppp2r1a	17	20945311	20965916	+	0.00555979	Ppp2r1a	ENSMUSG00000007564	protein phosphatase 2 (formerly 2A), regulatory subunit A (PR 65), alpha isoform [Source:MGI Symbol;Acc:MGI:1926334]	gene	overlapping	0	8.98035	7.58995	7.87405	7.93652	7.76781	7.84684	8.53469	8.16194	8.16246	8.03365	7.12764	7.0276	7.18767	6.52123	7.57561	7.59413	7.76733	7.25932	7.32153	7.19084
Drg2	11	60454591	60468754	+	0.000310145	Drg2	ENSMUSG00000020537	developmentally regulated GTP binding protein 2 [Source:MGI Symbol;Acc:MGI:1342307]	gene	overlapping	0	9.15181	8.53655	8.64593	8.08321	8.07473	7.74302	8.63462	8.69767	8.24986	8.29328	8.14733	7.11284	7.07019	7.47709	7.49181	7.97866	7.68244	7.66843	7.62409	7.48686
Exosc4	15	76327397	76330677	+	0.000199228	Exosc4	ENSMUSG00000034259	exosome component 4 [Source:MGI Symbol;Acc:MGI:1923576]	gene	overlapping	0	6.75382	6.26506	7.49722	6.44264	6.60048	6.62489	7.01308	7.32241	6.9764	7.00075	6.30757	6.32034	6.16346	5.74454	5.85811	5.93846	6.41151	5.7404	5.61583	6.05638
Psmc5	11	106256154	106263120	+	0.000471959	Psmc5	ENSMUSG00000020708	protease (prosome, macropain) 26S subunit, ATPase 5 [Source:MGI Symbol;Acc:MGI:105047]	gene	overlapping	0	8.63881	8.29526	8.42112	7.78654	7.89962	7.3706	8.4847	8.37705	7.80447	7.98987	7.86373	7.31124	6.84975	7.10081	7.40794	7.39159	7.86204	6.50612	7.18747	6.89776
Wdr73	7	80890723	80901269	-	0.000620612	Wdr73	ENSMUSG00000025722	WD repeat domain 73 [Source:MGI Symbol;Acc:MGI:1919218]	gene	overlapping	0	8.75624	8.0819	8.48946	7.78148	8.03561	7.56363	8.17849	8.49552	7.99359	8.01155	8.02022	7.47262	6.55822	7.50341	7.67773	7.12585	6.82193	7.05261	7.15287	7.22341
Ei24	9	36779159	36797393	-	3.57602e-05	Ei24	ENSMUSG00000062762	etoposide induced 2.4 mRNA [Source:MGI Symbol;Acc:MGI:108090]	gene	overlapping	0	8.9525	8.35122	8.82917	8.28286	8.62465	7.97185	8.62766	8.59456	8.16808	7.98205	7.84643	7.60216	7.53198	7.80134	7.82501	7.70284	7.20942	7.72743	7.63721	7.0245
Cstb	10	78425670	78427619	+	0.00573309	Cstb	ENSMUSG00000005054	cystatin B [Source:MGI Symbol;Acc:MGI:109514]	gene	overlapping	0	6.80456	6.85249	6.8225	6.32395	6.0691	5.68716	6.27255	7.10227	6.36101	6.83179	5.29585	5.30392	5.6324	5.85598	6.02902	5.93352	5.29911	5.72743	5.88327	5.87271
Gart	16	91621186	91646952	-	0.0142986	Gart	ENSMUSG00000022962	phosphoribosylglycinamide formyltransferase [Source:MGI Symbol;Acc:MGI:95654]	gene	overlapping	0	8.58903	7.97175	9.16972	8.0863	7.96543	8.26445	8.35243	8.30629	8.31716	7.77228	7.74671	7.57275	6.81131	7.4696	7.39775	7.68528	7.95726	6.06039	7.82092	7.31926
Ints1	5	139751282	139775678	-	0.0095616	Ints1	ENSMUSG00000029547	integrator complex subunit 1 [Source:MGI Symbol;Acc:MGI:1915760]	gene	overlapping	0	7.76827	7.17146	7.879	7.17252	7.65219	7.51718	7.42812	7.66611	7.75528	7.05989	6.75243	7.0052	6.48783	6.0062	6.28056	6.78619	7.61647	5.66078	6.73961	6.39233
Aurka	2	172356190	172370535	-	1.61251e-05	Aurka	ENSMUSG00000027496	aurora kinase A [Source:MGI Symbol;Acc:MGI:894678]	gene	overlapping	0	9.2637	8.99869	9.09289	8.32525	8.74064	7.98125	9.08855	9.11693	8.42624	8.65522	8.36007	7.69885	7.72049	7.5436	8.0343	8.19676	8.38556	7.90996	7.75172	7.59102
Dysf	6	84008590	84211060	+	0.0272223	Dysf	ENSMUSG00000033788	dysferlin [Source:MGI Symbol;Acc:MGI:1349385]	gene	overlapping	0	6.09435	5.23516	6.39989	6.44904	7.27856	6.6007	7.16509	6.81145	7.17703	7.00075	6.4831	5.25918	5.62887	6.16714	6.30477	5.8805	5.95636	5.36253	5.57095	5.36264
G2e3	12	51348061	51376986	+	0.0432379	G2e3	ENSMUSG00000035293	G2/M-phase specific E3 ubiquitin ligase [Source:MGI Symbol;Acc:MGI:2444298]	gene	overlapping	0	4.50428	5.91983	4.22721	4.82522	6.18024	4.51774	5.02373	5.39641	4.29884	4.29644	-1.22771	2.20909	2.57115	1.92333	2.84316	2.8361	3.48604	6.59983	3.56867	5.16356
Nek2	1	191821444	191833050	+	0.00458429	Nek2	ENSMUSG00000026622	NIMA (never in mitosis gene a)-related expressed kinase 2 [Source:MGI Symbol;Acc:MGI:109359]	gene	overlapping	0	8.65705	7.75971	8.44002	7.84052	8.39272	7.93488	8.24824	8.39079	7.47875	7.91382	7.65493	7.29563	6.99124	7.33501	7.24688	7.3943	6.00262	7.16989	7.44293	7.59358
Polr3c	3	96711490	96727628	-	0.00642893	Polr3c	ENSMUSG00000028099	polymerase (RNA) III (DNA directed) polypeptide C [Source:MGI Symbol;Acc:MGI:1921664]	gene	overlapping	0	6.14936	6.6061	8.22254	7.22105	7.36831	7.38113	7.42652	7.56134	7.36688	7.28758	6.85178	6.51208	6.14132	6.62826	6.38748	6.77793	6.0096	6.33928	6.41844	6.4142
Rpl10l	12	66283381	66284401	-	8.32416e-05	Rpl10l	ENSMUSG00000060499	ribosomal protein L10-like [Source:MGI Symbol;Acc:MGI:3647985]	gene	overlapping	0	8.31382	7.81128	8.11574	7.36855	7.65594	6.98572	7.97189	8.24084	7.55708	7.65817	7.20692	7.23146	6.90919	6.63125	6.79735	7.0352	7.36051	6.83864	6.7477	6.30137
Polr1e	4	45018583	45036565	+	2.67039e-05	Polr1e	ENSMUSG00000028318	polymerase (RNA) I polypeptide E [Source:MGI Symbol;Acc:MGI:1929022]	gene	overlapping	0	8.28842	8.07242	8.52151	7.63116	8.33589	7.82158	8.27434	8.35329	7.66516	7.7439	7.1408	6.92751	6.84062	7.0615	7.84466	7.19055	7.43635	7.32105	7.22054	6.92747
Cdc6	11	98907801	98923940	+	0.000900401	Cdc6	ENSMUSG00000017499	cell division cycle 6 homolog (S. cerevisiae) [Source:MGI Symbol;Acc:MGI:1345150]	gene	overlapping	0	8.82236	7.63644	8.40883	8.13924	8.63182	7.8193	8.21146	8.31819	8.08317	7.94392	8.3393	7.24586	7.34446	6.70823	7.11119	7.36703	6.91974	7.33287	7.48406	7.06193
Zfp775	6	48613180	48623227	+	0.00852953	Zfp775	ENSMUSG00000007216	zinc finger protein 775 [Source:MGI Symbol;Acc:MGI:2683557]	gene	overlapping	0	8.0464	7.60318	8.17819	7.8289	8.3706	7.77486	8.48393	7.98458	7.10736	7.43233	6.84643	7.75364	6.96067	6.56406	7.45787	7.16965	6.52069	7.26942	6.82235	6.58718
Plrg1	3	83055522	83072355	+	0.00240152	Plrg1	ENSMUSG00000027998	pleiotropic regulator 1, PRL1 homolog (Arabidopsis) [Source:MGI Symbol;Acc:MGI:1858197]	gene	overlapping	0	8.31819	7.77797	8.24267	7.42731	7.62273	7.58523	8.3217	7.93246	7.48596	7.53638	7.27413	6.97555	7.20319	7.22068	7.19836	6.90599	7.22	5.57289	7.06336	6.45556
Ascc2	11	4637747	4685699	+	0.0489769	Ascc2	ENSMUSG00000020412	activating signal cointegrator 1 complex subunit 2 [Source:MGI Symbol;Acc:MGI:1922702]	gene	overlapping	0	8.60701	5.86718	7.78813	7.46966	7.40226	7.97308	8.10719	7.87725	7.73119	6.91629	6.89123	6.94056	7.26137	7.07143	7.06168	7.0166	6.96177	6.16509	6.33501	6.18576
Xab2	8	3608421	3621316	-	0.0243833	Xab2	ENSMUSG00000019470	XPA binding protein 2 [Source:MGI Symbol;Acc:MGI:1914689]	gene	overlapping	0	8.529	6.84013	8.27085	7.32395	7.64936	7.71879	8.16316	7.54553	7.70049	7.31149	7.70155	6.1388	6.29629	6.37565	7.30695	7.15697	7.63126	6.00236	6.74971	6.33692
Jmjd6	11	116837432	116843449	-	9.40787e-05	Jmjd6	ENSMUSG00000056962	jumonji domain containing 6 [Source:MGI Symbol;Acc:MGI:1858910]	gene	overlapping	0	8.37595	8.40509	8.63132	7.62905	8.44197	7.4888	8.19365	8.53319	7.74027	7.91793	7.73663	7.29563	7.55077	6.34869	7.57561	7.19882	7.48228	7.16268	7.19637	7.00253
Mcm7	5	138164583	138172422	-	0.00499036	Mcm7	ENSMUSG00000029730	minichromosome maintenance deficient 7 (S. cerevisiae) [Source:MGI Symbol;Acc:MGI:1298398]	gene	overlapping	0	9.19762	7.34947	8.43195	8.06248	8.3194	7.83246	8.22167	7.91018	7.9796	7.7641	7.73808	6.91194	6.9981	6.73485	7.3446	7.51848	7.86011	7.38851	7.10567	6.96153
Kpna6	4	129643980	129672767	-	0.0131096	Kpna6	ENSMUSG00000003731	karyopherin (importin) alpha 6 [Source:MGI Symbol;Acc:MGI:1100836]	gene	overlapping	0	7.15181	7.11716	8.06271	7.3073	8.34697	7.93992	7.60018	7.65141	7.07302	6.95674	6.56019	6.18138	6.62887	6.76508	6.53059	6.90472	6.55691	7.45787	6.64535	6.43003
Puf60	15	76070184	76080946	-	0.00113879	Puf60	ENSMUSG00000002524	poly-U binding splicing factor 60 [Source:MGI Symbol;Acc:MGI:1915209]	gene	overlapping	0	9.0398	8.53578	8.64127	7.80289	8.29129	7.79354	8.70247	8.6236	8.10853	7.95115	7.49851	7.24873	6.81131	7.58655	8.00706	7.72377	7.91603	7.01308	7.54798	7.37161
Pgd	4	149149991	149166771	-	0.00214876	Pgd	ENSMUSG00000028961	phosphogluconate dehydrogenase [Source:MGI Symbol;Acc:MGI:97553]	gene	overlapping	0	9.57995	8.3599	8.76101	8.26164	8.67366	7.96197	8.97902	8.66011	8.17144	8.13797	8.07721	7.13468	7.6003	7.64757	8.11306	7.85389	8.26083	7.59001	7.47678	7.23083
Aqp9	9	71110659	71168682	-	0.000620703	Aqp9	ENSMUSG00000032204	aquaporin 9 [Source:MGI Symbol;Acc:MGI:1891066]	gene	overlapping	0	8.11082	8.29798	8.5379	8.01632	8.76607	7.93193	8.66962	8.79026	8.14147	8.46972	7.33071	7.45371	7.42914	7.61926	7.93838	7.75005	6.71699	7.12979	7.85594	7.48135
Bms1	6	118383383	118419417	-	0.0155052	Bms1	ENSMUSG00000030138	BMS1 homolog, ribosome assembly protein (yeast) [Source:MGI Symbol;Acc:MGI:2446132]	gene	overlapping	0	7.93411	8.06181	8.58051	7.23501	8.23652	7.32381	7.21611	8.63927	7.66118	7.70547	7.31726	7.23531	6.70799	6.68829	7.03956	7.72878	5.97433	7.17586	6.96706	7.03018
Rftn2	1	55170159	55226782	-	0.0139662	Rftn2	ENSMUSG00000025978	raftlin family member 2 [Source:MGI Symbol;Acc:MGI:1921263]	gene	overlapping	0	6.04772	5.9104	6.61002	6.46966	5.85374	5.61967	6.17276	6.9247	6.31919	5.8814	6.05769	5.40663	5.25107	4.55936	6.30695	5.29939	5.18648	4.96969	4.48889	4.61262
Pdhx	2	103021075	103073513	-	0.00339399	Pdhx	ENSMUSG00000010914	pyruvate dehydrogenase complex, component X [Source:MGI Symbol;Acc:MGI:1351627]	gene	overlapping	0	7.95391	7.24832	7.9219	7.20221	7.57888	7.17999	7.60728	8.10227	7.70127	6.87297	6.42693	6.62069	6.66725	6.43497	6.98475	7.10619	5.90108	6.57289	6.99366	6.807
Safb	17	56584982	56606294	+	0.000283447	Safb	ENSMUSG00000071054	scaffold attachment factor B [Source:MGI Symbol;Acc:MGI:2146974]	gene	overlapping	0	8.92697	7.75445	8.24421	7.9245	8.24777	7.80279	8.52048	8.17322	7.9719	7.55125	7.73663	7.29932	7.4849	6.83929	7.48316	7.38708	6.84164	7.32858	7.12132	6.82344
Urod	4	116989965	116994413	-	0.00752806	Urod	ENSMUSG00000028684	uroporphyrinogen decarboxylase [Source:MGI Symbol;Acc:MGI:98916]	gene	overlapping	0	7.77465	7.4226	8.14236	7.05147	6.92241	7.07548	7.72808	6.88413	7.44303	6.93423	6.83299	5.33658	6.57667	6.65785	6.85513	6.28586	6.71486	6.55465	6.78354	5.6695
Aldh9a1	1	167349991	167368530	+	0.0249357	Aldh9a1	ENSMUSG00000026687	aldehyde dehydrogenase 9, subfamily A1 [Source:MGI Symbol;Acc:MGI:1861622]	gene	overlapping	0	6.22115	6.97966	6.66614	5.70192	7.38652	6.0967	6.64225	6.7872	5.75528	5.8019	5.98661	5.67137	6.25565	5.25691	5.83411	5.58153	4.66484	5.69782	5.08187	5.36863
Nup107	10	117750624	117792705	-	0.0393499	Nup107	ENSMUSG00000052798	nucleoporin 107 [Source:MGI Symbol;Acc:MGI:2143854]	gene	overlapping	0	7.33555	7.48587	7.94098	7.00006	7.82148	7.45164	7.31997	7.88641	7.21009	7.23723	7.00351	5.95933	6.86183	6.60109	6.33073	6.38163	4.53528	7.23204	6.4901	7.09209
Utp20	10	88746607	88826814	-	0.036097	Utp20	ENSMUSG00000004356	UTP20, small subunit (SSU) processome component, homolog (yeast) [Source:MGI Symbol;Acc:MGI:1917933]	gene	overlapping	0	6.92697	6.82766	8.02028	7.34814	7.46357	7.25941	7.1082	8.05938	7.40736	7.42428	6.398	6.53728	5.44026	5.53405	6.40387	7.31469	6.31611	6.62452	7.10015	6.64257
Rrn3	16	13780699	13814840	+	4.52e-06	Rrn3	ENSMUSG00000022682	RRN3 RNA polymerase I transcription factor homolog (yeast) [Source:MGI Symbol;Acc:MGI:1925255]	gene	overlapping	0	8.88116	8.26783	8.49205	8.23037	8.34523	7.99826	8.75836	8.56989	7.99865	7.71965	8.12984	6.9767	7.37956	7.09	7.48123	7.49935	7.70628	7.57832	7.25924	7.1172
Mrpl2	17	46646229	46650139	+	0.00471592	Mrpl2	ENSMUSG00000002767	mitochondrial ribosomal protein L2 [Source:MGI Symbol;Acc:MGI:1351622]	gene	overlapping	0	6.53089	6.11716	7.32488	6.88902	6.26632	6.40076	6.96085	6.66211	6.78339	6.7439	6.18168	6.33837	5.64295	5.24915	5.21704	5.91103	6.05758	5.20305	6.22779	5.30762
Med6	12	81573557	81595008	-	0.0121072	Med6	ENSMUSG00000002679	mediator of RNA polymerase II transcription, subunit 6 homolog (yeast) [Source:MGI Symbol;Acc:MGI:1917042]	gene	overlapping	0	8.31492	7.99869	7.81528	7.27792	7.64086	6.95286	7.98394	8.10423	7.25936	7.69976	7.41073	6.85044	6.98573	6.8547	6.96969	6.73448	4.95274	6.73717	6.8796	7.04707
Umps	16	33954782	33967038	-	0.000208187	Umps	ENSMUSG00000022814	uridine monophosphate synthetase [Source:MGI Symbol;Acc:MGI:1298388]	gene	overlapping	0	8.74654	8.444	8.90061	7.84902	8.698	7.9188	8.30434	8.93633	8.10326	8.13021	7.02022	7.73334	7.82835	7.14642	7.867	7.51434	7.80194	7.22051	7.40252	7.52957
Abhd6	14	8002902	8056555	+	0.0154158	Abhd6	ENSMUSG00000025277	abhydrolase domain containing 6 [Source:MGI Symbol;Acc:MGI:1913332]	gene	overlapping	0	7.98035	8.49772	8.39644	8.08784	8.54534	7.70996	8.36839	8.34999	8.16246	7.94954	7.9195	7.5811	7.29072	7.80729	8.01308	6.64649	5.68244	6.56926	7.29072	6.7645
Urb1	16	90751527	90810413	-	0.0019648	Urb1	ENSMUSG00000039929	URB1 ribosome biogenesis 1 homolog (S. cerevisiae) [Source:MGI Symbol;Acc:MGI:2146468]	gene	overlapping	0	7.75382	7.23705	8.06967	6.91932	7.72821	7.10045	6.93401	7.84942	6.95835	7.51594	6.97196	7.01533	6.76862	6.00159	6.70114	6.03173	6.0843	6.67436	6.68169	5.98413
Churc1	12	76765538	76783180	+	0.0452867	Churc1	ENSMUSG00000090258	churchill domain containing 1 [Source:MGI Symbol;Acc:MGI:1923684]	gene	overlapping	0	6.17369	6.53731	5.93908	5.59912	5.09701	5.37122	5.49698	5.79695	5.65639	6.25551	5.11214	5.47343	5.1011	4.73624	4.58012	5.0201	3.3822	4.34566	5.2393	5.32927
Nolc1	19	46075863	46085528	+	3.7406e-06	Nolc1	ENSMUSG00000015176	nucleolar and coiled-body phosphoprotein 1 [Source:MGI Symbol;Acc:MGI:1918019]	gene	overlapping	0	10.3731	9.7757	10.0283	9.17566	9.53365	8.88021	9.97628	9.99255	9.33001	9.38449	9.27761	8.56205	8.6638	8.75724	8.85513	8.89712	8.69549	8.72049	8.75849	8.50735
2510012J08Rik	10	81321103	81326251	+	0.00231653	2510012J08Rik	ENSMUSG00000034889	RIKEN cDNA 2510012J08 gene [Source:MGI Symbol;Acc:MGI:1917562]	gene	overlapping	0	7.2374	7.34073	8.05922	6.60344	7.6342	7.23091	6.89974	7.42026	7.25409	6.72528	7.50869	6.05839	6.49366	6.41431	5.99696	6.12585	5.94547	5.86404	6.5021	5.92239
Ccdc86	19	10941481	10949266	-	0.000360245	Ccdc86	ENSMUSG00000024732	coiled-coil domain containing 86 [Source:MGI Symbol;Acc:MGI:1277220]	gene	overlapping	0	9.17309	8.12228	8.74698	7.81781	8.46303	7.86903	8.49775	8.79086	7.74027	7.86278	8.02968	7.35796	7.34984	6.9865	7.58193	7.35227	7.86011	6.96693	7.28656	7.48066
Copb2	9	98563731	98588375	+	2.58996e-07	Copb2	ENSMUSG00000032458	coatomer protein complex, subunit beta 2 (beta prime) [Source:MGI Symbol;Acc:MGI:1354962]	gene	overlapping	0	8.21061	8.10585	8.2648	7.71128	8.11691	7.98084	8.47698	8.11791	7.92886	7.57224	7.41254	7.40063	6.43218	7.22068	7.07965	7.34762	7.25569	6.98066	7.00045	7.05638
Wdr55	18	36760239	36763708	+	0.0499743	Wdr55	ENSMUSG00000042660	WD repeat domain 55 [Source:MGI Symbol;Acc:MGI:1915186]	gene	overlapping	0	8.1007	6.65773	7.80386	6.62764	7.35797	7.1899	7.26539	6.88641	7.06341	6.5007	5.91695	6.36852	7.0492	6.8863	6.43611	5.68233	5.67367	6.80663	5.67003	5.5026
Taf12	4	132274375	132295766	+	0.000169909	Taf12	ENSMUSG00000028899	TAF12 RNA polymerase II, TATA box binding protein (TBP)-associated factor [Source:MGI Symbol;Acc:MGI:1913714]	gene	overlapping	0	7.08668	7.33721	7.88394	7.17252	7.43433	7.13675	7.38418	7.53683	7.15229	7.14079	6.75813	5.56817	6.82527	6.48866	6.74523	6.26631	6.28766	6.84165	6.20153	5.49714
Mapkapk5	5	121518613	121545905	-	0.0130953	Mapkapk5	ENSMUSG00000029454	MAP kinase-activated protein kinase 5 [Source:MGI Symbol;Acc:MGI:1333110]	gene	overlapping	0	7.7029	8.35122	8.45138	7.74355	7.96392	7.45575	7.78552	8.53392	8.03355	7.92854	7.19856	7.27518	6.92079	6.56562	7.02902	7.20191	5.4454	7.74764	7.22995	7.42501
Dad1	14	54235479	54254104	-	0.00907063	Dad1	ENSMUSG00000022174	defender against cell death 1 [Source:MGI Symbol;Acc:MGI:101912]	gene	overlapping	0	6.51574	6.8623	6.12077	6.05882	5.82065	5.30244	5.74362	6.49851	5.86454	6.15337	4.78352	5.18538	5.44428	5.53086	5.72743	5.03404	5.35503	4.23089	5.45965	4.94059
Hnrnph2	X	134601179	134607060	+	0.0177013	Hnrnph2	ENSMUSG00000045427	heterogeneous nuclear ribonucleoprotein H2 [Source:MGI Symbol;Acc:MGI:1201779]	gene	overlapping	0	8.05166	6.97061	8.03367	7.57151	7.43105	7.95078	7.69782	7.54841	7.19916	6.70452	7.24193	6.54196	6.87829	6.81059	5.99696	5.92855	5.53528	7.1199	6.99451	6.45275
Sec16a	2	26409431	26445216	-	0.0302783	Sec16a	ENSMUSG00000026924	SEC16 homolog A (S. cerevisiae) [Source:MGI Symbol;Acc:MGI:2139207]	gene	overlapping	0	6.66736	7.03494	6.87504	6.9935	6.68565	6.89262	6.51521	6.96849	6.94662	6.90806	5.87558	5.82508	5.76058	6.94389	5.86108	6.00367	5.20486	4.10619	6.01476	6.18407
Ttc27	17	74717750	74863570	+	0.00027933	Ttc27	ENSMUSG00000024078	tetratricopeptide repeat domain 27 [Source:MGI Symbol;Acc:MGI:1921446]	gene	overlapping	0	8.22232	7.58551	8.23573	7.4783	7.51722	7.73965	8.50384	8.13338	7.2782	7.36418	7.04375	6.12016	6.86183	6.56874	7.3004	7.17281	7.33292	6.91355	6.87129	6.68517
Ddx54	5	120613130	120628590	+	0.00142626	Ddx54	ENSMUSG00000029599	DEAD (Asp-Glu-Ala-Asp) box polypeptide 54 [Source:MGI Symbol;Acc:MGI:1919240]	gene	overlapping	0	9.01712	7.78444	8.5799	7.67826	8.7224	8.29066	9.03851	8.60083	7.93941	7.775	7.78492	7.28823	7.314	7.59269	7.69199	7.67568	7.73502	6.82044	7.64427	7.00638
Stx18	5	38038742	38137765	+	0.0483283	Stx18	ENSMUSG00000029125	syntaxin 18 [Source:MGI Symbol;Acc:MGI:1918366]	gene	overlapping	0	7.29176	5.79216	6.49335	6.76617	5.90831	5.72464	5.93627	6.81625	6.35707	6.47196	6.05769	5.59242	5.04391	4.37209	4.45983	5.14524	6.2819	5.61222	6.07867	5.03018
Ppp1r10	17	35916434	35932281	+	0.000701592	Ppp1r10	ENSMUSG00000039220	protein phosphatase 1, regulatory subunit 10 [Source:MGI Symbol;Acc:MGI:1289273]	gene	overlapping	0	7.77941	7.14958	7.19419	7.3309	6.77301	7.53338	7.63532	7.90456	7.68411	7.19591	7.38884	5.72445	6.4543	6.63423	6.80663	6.556	6.40887	5.82501	6.62354	5.93051
Ptdss2	7	141122382	141157021	+	7.35507e-07	Ptdss2	ENSMUSG00000025495	phosphatidylserine synthase 2 [Source:MGI Symbol;Acc:MGI:1351664]	gene	overlapping	0	9.41882	9.09496	9.15223	8.56783	8.90673	8.19728	9.19554	9.22423	8.6183	8.7069	8.25711	7.76967	7.89896	8.09812	8.52872	8.02825	7.92898	7.64017	8.04666	7.67494
RP23-72M20.2	7	30641001	30664937	-	5.51071e-05	RP23-72M20.2	ENSMUSG00000094365	No description	gene	overlapping	0	9.37805	8.62135	8.8869	8.25799	8.4084	8.01189	9.12065	8.71898	8.35363	8.42601	8.06346	7.46525	7.27046	7.66078	7.84466	7.98645	8.24685	7.39672	7.72534	7.30137
Rarg	15	102234938	102257517	-	0.0395294	Rarg	ENSMUSG00000001288	retinoic acid receptor, gamma [Source:MGI Symbol;Acc:MGI:97858]	gene	overlapping	0	7.27387	5.04144	7.29996	7.07754	6.65407	7.23843	7.42652	6.50744	7.5224	6.55019	5.67918	5.86046	5.83296	5.45197	6.63671	5.96053	6.39026	5.64707	6.43105	6.11986
Pot1a	6	25743737	25809246	-	0.0452867	Pot1a	ENSMUSG00000029676	protection of telomeres 1A [Source:MGI Symbol;Acc:MGI:2141503]	gene	overlapping	0	6.90097	6.69939	7.07313	6.86647	6.32177	7.13089	7.12807	6.70933	6.56903	6.463	6.33835	6.01869	3.83909	6.64313	6.6419	5.93352	5.23498	5.55098	5.59581	4.88738
9530068E07Rik	11	52396428	52408728	+	0.000921075	9530068E07Rik	ENSMUSG00000036275	RIKEN cDNA 9530068E07 gene [Source:MGI Symbol;Acc:MGI:2654705]	gene	overlapping	0	6.50428	6.61483	6.98945	6.97364	6.94101	6.70504	6.92268	6.65677	6.40355	6.9326	5.56671	5.7217	5.6638	5.84573	5.59805	5.86758	5.12347	6.33501	6.33098	5.87901
Bzw2	12	36091846	36156825	-	9.3975e-06	Bzw2	ENSMUSG00000020547	basic leucine zipper and W2 domains 2 [Source:MGI Symbol;Acc:MGI:1914162]	gene	overlapping	0	9.20058	8.64925	8.82507	8.17494	8.6	7.78843	8.92779	8.93467	8.20518	8.41443	8.16353	7.32758	7.89308	7.63646	7.84241	7.67864	7.18802	7.56835	7.77268	7.48135
Nat10	2	103721256	103761270	-	0.0013874	Nat10	ENSMUSG00000027185	N-acetyltransferase 10 [Source:MGI Symbol;Acc:MGI:2138939]	gene	overlapping	0	8.39367	7.19106	8.28436	7.40854	8.04065	7.46627	7.83955	8.44604	7.98087	7.42081	6.68518	7.22759	7.24531	6.83282	7.01575	6.3336	7.42071	7.09614	6.96359	6.43432
Rbm10	X	20617503	20650901	+	0.0264898	Rbm10	ENSMUSG00000031060	RNA binding motif protein 10 [Source:MGI Symbol;Acc:MGI:2384310]	gene	overlapping	0	7.65186	6.4226	8.10309	7.15794	7.88769	7.44338	6.80169	7.66877	7.10267	6.43348	5.92204	5.89498	6.72463	6.41431	6.91355	6.18535	6.36051	6.45983	7.01476	5.75653
Lmbrd1	1	24678544	24766299	+	0.032069	Lmbrd1	ENSMUSG00000073725	LMBR1 domain containing 1 [Source:MGI Symbol;Acc:MGI:1915671]	gene	overlapping	0	6.77941	7.81002	8.38882	7.92335	7.2614	7.37246	7.61575	8.03487	7.61666	7.77952	6.47965	6.98588	6.61108	6.43155	6.24688	7.32229	5.32174	6.89337	7.36555	7.04614
Sh3bp5l	11	58330724	58347728	+	0.0317487	Sh3bp5l	ENSMUSG00000013646	SH3 binding domain protein 5 like [Source:MGI Symbol;Acc:MGI:1933124]	gene	overlapping	0	6.5384	5.72919	6.7113	6.8289	6.88769	7.12278	6.36253	6.67539	7.39495	6.29644	5.77229	5.20517	5.51103	5.13594	5.91068	6.58942	5.36596	4.94749	6.32288	6.03018
A430005L14Rik	4	153957237	153961925	+	0.0251941	A430005L14Rik	ENSMUSG00000047613	RIKEN cDNA A430005L14 gene [Source:MGI Symbol;Acc:MGI:2140680]	gene	overlapping	0	7.81077	7.49851	7.86808	6.83869	7.22897	6.86108	7.5332	7.55561	7.20573	7.47642	6.90157	5.64843	6.13137	6.49359	6.32213	6.77931	4.51579	7.03298	6.76673	6.75653
Kif18b	11	102905529	102925124	-	0.0208691	Kif18b	ENSMUSG00000051378	kinesin family member 18B [Source:MGI Symbol;Acc:MGI:2446979]	gene	overlapping	0	7.342	6.70758	7.10224	6.57736	6.95175	6.77062	7.14377	6.98564	6.31514	6.2346	6.31919	4.07785	6.21383	5.90617	5.53618	6.42812	5.81197	5.02902	6.37733	5.97631
Wdr89	12	75630594	75669537	-	0.00069982	Wdr89	ENSMUSG00000045690	WD repeat domain 89 [Source:MGI Symbol;Acc:MGI:1919588]	gene	overlapping	0	7.50811	6.4226	7.297	5.90192	7.25769	6.73627	6.54803	7.21563	6.52064	6.79834	6.33071	5.88275	5.9981	6.22365	5.64017	5.68528	5.73818	5.77862	5.92131	6.08028
Rbm42	7	30640994	30650317	-	0.000119652	Rbm42	ENSMUSG00000036733	RNA binding motif protein 42 [Source:MGI Symbol;Acc:MGI:1915285]	gene	overlapping	0	9.35003	8.54495	8.75023	8.06404	8.3706	7.72171	8.99588	8.59735	8.17312	8.29265	8.05769	7.19432	7.27386	7.52525	7.83638	7.69847	8.06598	7.3318	7.53752	7.18661
Klhl21	4	152008803	152017680	+	0.0239654	Klhl21	ENSMUSG00000073700	kelch-like 21 (Drosophila) [Source:MGI Symbol;Acc:MGI:1919288]	gene	overlapping	0	9.25233	7.73722	8.5379	7.81781	8.58135	7.81199	8.68647	8.49701	7.46694	7.30398	7.87427	7.16126	7.7378	7.31006	8.03759	6.67345	6.40092	7.59715	6.67746	6.99288
Tmem97	11	78541817	78550777	-	0.000189068	Tmem97	ENSMUSG00000037278	transmembrane protein 97 [Source:MGI Symbol;Acc:MGI:1916321]	gene	overlapping	0	8.53183	8.07347	8.37555	7.61914	8.14792	7.23297	8.22167	8.46451	7.84643	8.10451	6.67918	7.32306	7.15489	7.34414	7.59001	7.23346	7.33153	6.52685	7.22706	6.75196
Tbl3	17	24697949	24707660	-	0.000223551	Tbl3	ENSMUSG00000040688	transducin (beta)-like 3 [Source:MGI Symbol;Acc:MGI:2384863]	gene	overlapping	0	9.97932	8.61628	9.09374	8.53547	9.0585	8.41772	9.19648	9.30672	8.66873	8.54913	8.40165	8.00971	7.80272	7.51397	8.3004	8.16491	8.368	8.15422	7.94349	7.70778
Slc25a20	9	108662098	108684641	+	1.05118e-05	Slc25a20	ENSMUSG00000032602	solute carrier family 25 (mitochondrial carnitine/acylcarnitine translocase), member 20 [Source:MGI Symbol;Acc:MGI:1928738]	gene	overlapping	0	7.4335	7.09444	7.57868	7.55675	7.42555	7.39343	7.64914	7.34085	6.95445	6.78402	6.81121	6.60588	6.0883	6.2433	6.802	6.04326	6.13948	6.12856	6.64751	6.0264
Slc4a11	2	130684113	130697519	-	0.0031924	Slc4a11	ENSMUSG00000074796	solute carrier family 4, sodium bicarbonate transporter-like, member 11 [Source:MGI Symbol;Acc:MGI:2138987]	gene	overlapping	0	6.69788	6.99758	7.90547	7.71128	7.20096	7.25403	7.21982	7.50298	7.10736	7.18369	6.93468	5.6339	6.15366	5.67388	6.92353	6.94093	6.00611	5.86996	6.72227	5.74737
Narfl	17	25773776	25783332	+	0.000390506	Narfl	ENSMUSG00000002280	nuclear prelamin A recognition factor-like [Source:MGI Symbol;Acc:MGI:1914813]	gene	overlapping	0	7.98723	7.6884	8.36429	7.27161	7.60438	7.37494	7.759	7.74879	7.28442	7.2568	7.28009	6.54351	6.78458	5.3505	6.62101	6.95931	7.23199	6.52872	6.23643	6.79816
Dhx38	8	109548017	109565601	-	0.02592	Dhx38	ENSMUSG00000037993	DEAH (Asp-Glu-Ala-His) box polypeptide 38 [Source:MGI Symbol;Acc:MGI:1927617]	gene	overlapping	0	7.36543	6.64357	7.12911	6.16379	6.70573	7.01865	6.43132	6.93798	7.12827	5.77681	6.0715	6.36677	5.17076	5.0403	6.34354	6.07956	5.3048	4.91926	6.38513	5.70542
Ciao1	2	127240938	127247816	-	0.0134063	Ciao1	ENSMUSG00000003662	cytosolic iron-sulfur protein assembly 1 homolog (S. cerevisiae) [Source:MGI Symbol;Acc:MGI:1346998]	gene	overlapping	0	8.33555	7.12126	7.99036	6.85446	7.3545	7.02894	7.41847	8.00785	7.08139	7.41618	7.32496	6.85545	5.56747	5.68542	6.52498	6.648	5.94547	6.22629	6.97397	6.93354
Kin	2	10080593	10092806	+	0.000282915	Kin	ENSMUSG00000037262	antigenic determinant of rec-A protein [Source:MGI Symbol;Acc:MGI:96676]	gene	overlapping	0	5.8745	6.58551	6.98578	6.55081	6.69116	6.664	7.42008	6.66478	6.37662	5.90475	5.84375	5.99159	5.55636	5.47875	5.73717	5.48673	5.34402	5.58012	5.84043	5.66464
Zc3h18	8	122376609	122417360	+	0.00817527	Zc3h18	ENSMUSG00000017478	zinc finger CCCH-type containing 18 [Source:MGI Symbol;Acc:MGI:1923264]	gene	overlapping	0	8.25916	6.64925	7.63718	7.18792	7.53671	7.51211	7.51521	7.59944	7.35412	7.00384	7.13643	6.21301	6.4483	5.86108	6.96002	6.59413	5.03036	6.42008	6.50806	6.91423
Atp6ap1	X	74297097	74304721	+	0.00621402	Atp6ap1	ENSMUSG00000019087	ATPase, H+ transporting, lysosomal accessory protein 1 [Source:MGI Symbol;Acc:MGI:109629]	gene	overlapping	0	8.31601	6.99981	8.88886	7.77257	8.05566	7.35998	7.14767	7.42812	7.33726	7.15893	7.36288	6.81481	6.92367	6.62227	6.75005	7.01308	6.80997	6.05001	6.91504	6.33539
Dusp10	1	184013302	184075636	+	0.0357168	Dusp10	ENSMUSG00000039384	dual specificity phosphatase 10 [Source:MGI Symbol;Acc:MGI:1927070]	gene	overlapping	0	7.06603	6.78185	7.59081	6.12231	7.94024	7.11909	6.57434	7.82461	6.95575	6.92284	6.25611	6.56358	6.06235	5.42123	5.78176	6.74864	5.32734	5.69782	6.8906	6.43717
Dlgap5	14	47387779	47418407	-	0.0130953	Dlgap5	ENSMUSG00000037544	discs, large (Drosophila) homolog-associated protein 5 [Source:MGI Symbol;Acc:MGI:2183453]	gene	overlapping	0	6.00497	6.17343	6.18941	5.56415	5.2931	6.76874	5.57434	5.45299	6.1132	5.87127	4.70303	4.84035	5.05448	5.57186	5.31564	4.46289	4.55452	4.44406	5.29556	5.12517
Afmid	11	117825924	117839908	+	0.00193073	Afmid	ENSMUSG00000017718	arylformamidase [Source:MGI Symbol;Acc:MGI:2448704]	gene	overlapping	0	7.46736	6.58847	7.79444	7.81161	6.73266	7.02341	7.50156	7.31395	6.62076	7.22403	6.47965	6.49449	6.09087	5.28373	6.90925	6.3925	6.29053	5.80971	6.05768	6.5026
Atp5e	2	174461072	174464105	-	0.0376444	Atp5e	ENSMUSG00000016252	ATP synthase, H+ transporting, mitochondrial F1 complex, epsilon subunit [Source:MGI Symbol;Acc:MGI:1855697]	gene	overlapping	0	6.24431	6.26506	6.17658	5.41182	4.14592	4.95949	5.16123	6.07848	5.42437	5.92773	4.83838	5.13261	4.67069	4.48206	4.18419	4.73163	5.229	3.52123	5.10409	4.6622
Cir1	2	73283105	73312701	-	0.00450104	Cir1	ENSMUSG00000041777	corepressor interacting with RBPJ, 1 [Source:MGI Symbol;Acc:MGI:1914185]	gene	overlapping	0	7.41729	6.51571	7.37485	6.72189	7.36831	6.78936	7.42169	7.83884	7.1748	7.2477	6.81941	6.97093	6.48977	5.42468	6.60692	6.25247	6.27322	5.06039	5.92489	5.51074
Nampt	12	32820335	32853369	+	0.0177013	Nampt	ENSMUSG00000020572	nicotinamide phosphoribosyltransferase [Source:MGI Symbol;Acc:MGI:1929865]	gene	overlapping	0	8.08283	8.35383	8.3227	7.602	8.07683	7.7183	8.03956	7.56134	7.73422	7.02379	7.15383	6.78882	6.98297	5.64165	6.20305	6.02709	6.75491	7.90061	7.15439	7.22341
R3hcc1	14	69697307	69707584	-	0.000402696	R3hcc1	ENSMUSG00000034194	R3H domain and coiled-coil containing 1 [Source:MGI Symbol;Acc:MGI:1919093]	gene	overlapping	0	7.54774	6.58847	8.24113	7.45542	7.28463	7.34865	7.38913	7.80542	7.31919	7.33255	6.79466	6.73674	6.88718	6.25884	6.23548	6.55438	6.78576	5.5436	6.63012	6.05266
Atxn7l3b	10	112925438	112929026	-	0.0166672	Atxn7l3b	ENSMUSG00000074748	ataxin 7-like 3B [Source:MGI Symbol;Acc:MGI:1914971]	gene	overlapping	0	6.23971	6.30878	5.90061	7.37277	6.59266	6.93278	6.79673	7.14296	7.20244	6.06434	6.44472	5.34017	6.38899	5.97597	5.36672	4.74864	5.87836	5.75325	5.84609	4.61262
Tut1	19	8953850	8966207	+	0.0039002	Tut1	ENSMUSG00000071645	terminal uridylyl transferase 1, U6 snRNA-specific [Source:MGI Symbol;Acc:MGI:1917294]	gene	overlapping	0	7.79361	6.11306	7.54665	6.32916	6.85701	7.34865	7.01308	6.97709	6.64676	6.53958	6.47965	6.07999	5.73452	4.9037	6.29382	5.85193	6.47346	6.12114	5.74669	5.89569
Brms1	19	5041404	5049917	+	1.49921e-05	Brms1	ENSMUSG00000080268	breast cancer metastasis-suppressor 1 [Source:MGI Symbol;Acc:MGI:2388804]	gene	overlapping	0	7.53653	7.61918	7.79444	7.15304	7.67828	7.13529	7.92495	7.3241	7.38147	7.18777	7.25409	6.87412	6.58944	6.06702	6.95308	5.99419	6.27031	5.75325	6.27051	6.34605
Arrdc1	2	24925352	24935252	-	0.0431149	Arrdc1	ENSMUSG00000026972	arrestin domain containing 1 [Source:MGI Symbol;Acc:MGI:2446136]	gene	overlapping	0	7.28508	5.78185	6.27009	6.5039	7.18285	7.07166	7.61434	6.4835	6.54158	5.74019	6.56345	4.90953	5.6324	5.31006	6.19365	5.1749	5.52069	5.34141	6.6838	5.19422
Exosc10	4	148558429	148582401	+	2.13864e-05	Exosc10	ENSMUSG00000017264	exosome component 10 [Source:MGI Symbol;Acc:MGI:1355322]	gene	overlapping	0	8.46045	7.55709	8.63191	7.78338	8.17959	8.10008	8.54877	8.36645	7.81668	7.60417	7.398	6.43372	7.45729	6.73624	7.22051	7.1686	7.12508	7.22629	7.38642	7.17726
Wdtc1	4	133292459	133353481	-	0.000263036	Wdtc1	ENSMUSG00000037622	WD and tetratricopeptide repeats 1 [Source:MGI Symbol;Acc:MGI:2685541]	gene	overlapping	0	9.34469	8.28527	8.68324	7.90775	8.96543	8.55736	8.89685	9.04922	8.63666	8.26778	7.8624	6.8454	7.40042	7.59728	8.12114	8.10894	8.0252	7.43312	7.91055	7.4207
Cnot10	9	114585878	114640200	-	0.00117716	Cnot10	ENSMUSG00000056167	CCR4-NOT transcription complex, subunit 10 [Source:MGI Symbol;Acc:MGI:1926143]	gene	overlapping	0	8.41831	7.03711	8.3314	6.95689	7.82649	7.68466	7.84075	7.69637	6.93216	7.52243	6.98904	6.82508	6.36796	6.09325	7.0578	7.05128	6.92898	6.31348	6.84326	6.26653
Mybbp1a	11	72441355	72451768	+	8.27474e-05	Mybbp1a	ENSMUSG00000040463	MYB binding protein (P160) 1a [Source:MGI Symbol;Acc:MGI:106181]	gene	overlapping	0	9.60879	8.55633	9.18301	8.51043	8.8319	8.35401	9.16557	9.10276	8.73952	8.65669	8.42514	7.71136	7.71133	7.35683	8.00034	8.33501	8.45439	7.0974	7.97009	7.50871
Zscan5b	7	6222278	6239423	+	0.000780334	Zscan5b	ENSMUSG00000058028	zinc finger and SCAN domain containing 5B [Source:MGI Symbol;Acc:MGI:2159640]	gene	overlapping	0	8.42542	8.41762	8.62189	8.1427	8.35624	7.87167	8.7018	8.31988	8.17312	8.0636	7.59725	7.0276	7.46027	7.27612	7.64449	7.556	5.51579	7.74844	7.12365	7.30215
Nob1	8	107412486	107425051	-	2.14575e-06	Nob1	ENSMUSG00000003848	NIN1/RPN12 binding protein 1 homolog (S. cerevisiae) [Source:MGI Symbol;Acc:MGI:1914869]	gene	overlapping	0	8.79753	8.15758	8.74155	7.91239	8.43433	7.71094	8.76091	8.76874	8.05069	8.07908	7.87295	7.43707	7.34554	7.09758	7.63497	7.45686	6.69766	7.36043	7.45841	7.17043
Pex19	1	172126755	172136493	+	8.69066e-07	Pex19	ENSMUSG00000003464	peroxisomal biogenesis factor 19 [Source:MGI Symbol;Acc:MGI:1334458]	gene	overlapping	0	8.25461	8.33281	8.72513	7.91123	8.14592	7.89435	8.61152	8.46909	7.95445	7.85766	7.55856	7.38076	7.43925	7.23646	7.00236	7.03173	6.38758	7.4231	7.37341	7.22671
Ap1m2	9	21295457	21312333	-	0.0367211	Ap1m2	ENSMUSG00000003309	adaptor protein complex AP-1, mu 2 subunit [Source:MGI Symbol;Acc:MGI:1336974]	gene	overlapping	0	8.21648	5.93386	7.6787	7.43862	6.94562	7.03366	7.4847	6.99414	7.47512	7.1295	6.87032	5.95466	6.15857	4.53405	6.18656	6.42636	7.076	5.09108	6.85173	6.36564
Snapc5	9	64179297	64182684	+	0.00955001	Snapc5	ENSMUSG00000032398	small nuclear RNA activating complex, polypeptide 5 [Source:MGI Symbol;Acc:MGI:1914282]	gene	overlapping	0	5.73759	5.96607	6.68438	5.98361	5.85046	5.42732	5.59733	6.87034	6.04398	6.53744	5.81121	5.02092	5.68437	4.98534	5.38335	4.97264	3.63804	5.06555	5.30106	4.26653
2410002I01Rik	11	120090531	120098731	-	0.0435419	2410002I01Rik	ENSMUSG00000025377	RIKEN cDNA 2410002I01 gene [Source:MGI Symbol;Acc:MGI:1926027]	gene	overlapping	0	4.25347	5.05861	6.1341	6.15794	6.11895	6.56091	6.50308	5.54263	6.12942	5.45849	4.63027	4.86544	4.79565	3.7473	5.23089	4.79303	5.22301	4.35412	5.4448	5.29195
Nup54	5	92415540	92435219	-	0.0421965	Nup54	ENSMUSG00000034826	nucleoporin 54 [Source:MGI Symbol;Acc:MGI:1920460]	gene	overlapping	0	8.01038	7.83016	7.41362	6.94674	7.62177	7.20742	7.16701	7.73111	7.13632	7.57743	6.03908	6.30024	5.71133	5.73624	5.92495	6.648	5.25863	7.68865	6.72534	7.05266
AC163993.1	19	28893042	28911879	-	0.0424331	AC163993.1	ENSMUSG00000095556	No description	gene	overlapping	0	7.35483	6.29798	7.48036	7.16086	6.91929	6.65891	6.5332	6.88869	7.00933	7.19861	4.78352	5.06491	5.02253	5.92089	6.72254	6.80798	6.1616	5.23089	6.62354	5.59741
Dph2	4	117888643	117892032	-	1.75872e-05	Dph2	ENSMUSG00000028540	DPH2 homolog (S. cerevisiae) [Source:MGI Symbol;Acc:MGI:1914978]	gene	overlapping	0	7.9525	7.34248	7.49851	6.77257	7.72374	7.0982	7.45354	7.73618	7.34025	7.06582	6.76947	5.64843	6.53387	6.14433	7.04479	6.20602	6.09419	6.45394	6.48285	6.32157
Kif22	7	127027732	127042420	-	2.92295e-05	Kif22	ENSMUSG00000030677	kinesin family member 22 [Source:MGI Symbol;Acc:MGI:109233]	gene	overlapping	0	9.47961	8.24363	9.12953	8.28554	8.76781	8.05936	9.26	8.9803	8.30548	8.37616	8.43229	7.40492	7.73288	7.40038	8.09992	7.69408	7.72126	7.54914	7.71816	7.31926
Ddx56	11	6258919	6267772	-	0.000108163	Ddx56	ENSMUSG00000004393	DEAD (Asp-Glu-Ala-Asp) box polypeptide 56 [Source:MGI Symbol;Acc:MGI:1277172]	gene	overlapping	0	8.41219	7.52964	8.61061	7.79411	7.89724	7.53116	8.24824	8.36235	8.13517	8.07908	7.83434	6.75431	6.74761	6.81454	7.11119	7.07395	7.61875	5.75645	7.10802	6.99288
Zfand2a	5	139471211	139484549	-	3.50514e-06	Zfand2a	ENSMUSG00000053581	zinc finger, AN1-type domain 2A [Source:MGI Symbol;Acc:MGI:2140729]	gene	overlapping	0	8.46243	8.0986	8.54665	8.07444	8.70164	7.96445	8.74104	8.25682	7.81454	7.72059	7.30367	6.95349	7.51773	7.33958	7.59626	7.47996	6.58758	7.22629	7.17628	6.98705
Ndufa9	6	126821863	126849144	-	0.000350635	Ndufa9	ENSMUSG00000000399	NADH dehydrogenase (ubiquinone) 1 alpha subcomplex, 9 [Source:MGI Symbol;Acc:MGI:1913358]	gene	overlapping	0	8.19643	7.00425	7.92382	7.33868	6.96543	6.97349	7.75772	7.45299	7.28338	7.38331	6.60834	6.20909	6.16833	6.13804	6.79735	6.87017	6.76939	5.4559	6.74467	6.17556
Pes1	11	3963975	3980004	+	2.87577e-05	Pes1	ENSMUSG00000020430	pescadillo homolog 1, containing BRCT domain (zebrafish) [Source:MGI Symbol;Acc:MGI:1890613]	gene	overlapping	0	8.87153	8.0986	8.10394	7.73046	8.37402	7.90641	8.2096	8.20377	7.98915	7.64832	7.67467	7.14701	6.74108	6.67821	7.59537	6.58627	7.40887	6.38954	7.26418	7.09751
2610528E23Rik	16	57302199	57606825	-	0.0095616	2610528E23Rik	ENSMUSG00000022748	RIKEN cDNA 2610528E23 gene [Source:MGI Symbol;Acc:MGI:1913747]	gene	overlapping	0	6.9525	5.71301	7.01308	5.9388	6.12709	6.05859	6.16893	6.42183	6.02676	5.95993	5.09422	4.54972	3.94513	5.39335	5.96693	5.29553	5.42464	5.20305	5.8214	4.97239
Gm5422	10	31248140	31251045	+	0.031345	Gm5422	ENSMUSG00000039684	predicted pseudogene 5422 [Source:MGI Symbol;Acc:MGI:3643411]	gene	overlapping	0	5.76347	3.70213	5.28212	4.77001	4.24901	5.15131	5.11419	4.81145	4.75229	3.93098	4.80571	3.81481	3.10619	3.32858	3.20305	3.84667	4.3822	2.81891	4.17178	3.65242
Nup93	8	94214597	94315066	+	0.0177013	Nup93	ENSMUSG00000032939	nucleoporin 93 [Source:MGI Symbol;Acc:MGI:1919055]	gene	overlapping	0	8.39263	6.54952	8.21863	6.89255	7.23149	7.32509	7.50004	6.98777	6.92952	6.98831	6.32688	6.33479	6.71633	6.23744	6.68614	6.78206	4.8707	6.7061	6.41082	5.9506
Lrwd1	5	136122772	136136074	-	0.000246626	Lrwd1	ENSMUSG00000029703	leucine-rich repeats and WD repeat domain containing 1 [Source:MGI Symbol;Acc:MGI:1918985]	gene	overlapping	0	7.32037	5.9385	6.80594	6.37024	6.27367	6.66603	6.99155	6.95332	6.30293	6.35573	6.21108	5.50251	5.65341	4.85343	5.14572	5.62208	5.99559	5.03955	5.46946	5.98997
Rcl1	19	29101375	29143843	+	2.58996e-07	Rcl1	ENSMUSG00000024785	RNA terminal phosphate cyclase-like 1 [Source:MGI Symbol;Acc:MGI:1913275]	gene	overlapping	0	8.74816	8.15259	8.75293	7.8246	8.20224	7.65279	8.1993	8.6352	8.0018	8.02379	7.71774	7.1643	7.13635	6.92819	7.56015	7.36978	7.09911	6.57289	7.40124	6.88634
Pop1	15	34495304	34530648	+	0.00840021	Pop1	ENSMUSG00000022325	processing of precursor 1, ribonuclease P/MRP family, (S. cerevisiae) [Source:MGI Symbol;Acc:MGI:1914974]	gene	overlapping	0	6.69788	7.16948	7.2534	6.14419	7.36831	6.89694	7.39242	7.12759	7.05008	6.44035	6.90157	5.89254	5.01173	5.45871	5.91068	6.55921	6.03379	4.83713	6.50329	4.73352
Dmrtb1	4	107676290	107684230	-	2.14909e-06	Dmrtb1	ENSMUSG00000028610	DMRT-like family B with proline-rich C-terminal, 1 [Source:MGI Symbol;Acc:MGI:1927125]	gene	overlapping	0	7.41525	6.66336	7.21941	6.97475	7.36946	6.81975	7.59591	7.12179	6.81668	6.84565	6.48997	5.30758	5.93086	5.86869	6.2582	6.45254	6.18648	6.31997	5.90513	5.49167
Unc13b	4	43058953	43264871	+	0.0418785	Unc13b	ENSMUSG00000028456	unc-13 homolog B (C. elegans) [Source:MGI Symbol;Acc:MGI:1342278]	gene	overlapping	0	5.19761	6.25392	5.5689	6.00767	4.99984	4.89521	5.29382	4.94018	5.48686	4.60417	4.45879	3.49288	4.97325	4.59039	5.05521	4.01543	2.90108	3.412	4.4448	4.7926
Tmem231	8	111912018	111933791	-	0.00545818	Tmem231	ENSMUSG00000031951	transmembrane protein 231 [Source:MGI Symbol;Acc:MGI:2685024]	gene	overlapping	0	7.32473	7.03277	5.98025	6.64587	6.40002	7.09368	6.75133	7.6188	7.37662	6.39866	5.82757	6.21105	4.69791	6.35953	5.99696	5.88563	6.37681	5.64707	5.9231	5.25688
Sbds	5	130245731	130255530	-	5.44086e-05	Sbds	ENSMUSG00000025337	Shwachman-Bodian-Diamond syndrome homolog (human) [Source:MGI Symbol;Acc:MGI:1913961]	gene	overlapping	0	8.29398	7.99424	8.24651	7.51157	7.97072	7.43983	8.37423	8.20743	7.50296	7.68827	7.2235	6.64118	6.66553	6.55622	7.09614	6.2264	6.3048	7.42712	7.15743	7.26171
Pwp2	10	78170910	78185149	-	2.94647e-08	Pwp2	ENSMUSG00000032834	PWP2 periodic tryptophan protein homolog (yeast) [Source:MGI Symbol;Acc:MGI:1341200]	gene	overlapping	0	7.95812	7.8364	7.86907	7.33782	7.9548	7.62698	8.22352	7.85293	7.91355	7.26198	7.14733	6.8617	6.53387	6.70681	7.04348	7.00131	6.56878	6.00773	6.78059	6.60123
Vdac1	11	52360860	52389397	+	0.000410429	Vdac1	ENSMUSG00000020402	voltage-dependent anion channel 1 [Source:MGI Symbol;Acc:MGI:106919]	gene	overlapping	0	8.52617	7.5126	7.96914	7.5523	7.84471	7.67814	8.63879	7.88641	7.77014	7.79656	7.00831	5.85545	6.69791	6.77592	7.2582	7.38073	7.03379	6.3004	7.37993	6.75767
Eef2	10	81176631	81182507	+	0.000105533	Eef2	ENSMUSG00000034994	eukaryotic translation elongation factor 2 [Source:MGI Symbol;Acc:MGI:95288]	gene	overlapping	0	10.2651	9.46146	9.354	8.91441	9.30512	8.67689	9.89395	9.52184	9.01308	8.79923	8.82486	7.94821	8.00493	7.94089	8.35042	8.53817	9.11175	8.02506	8.23535	7.90241
Gm17151	10	80766859	80768987	-	0.0117152	Gm17151	ENSMUSG00000075558	predicted gene 17151 [Source:MGI Symbol;Acc:MGI:4937978]	gene	overlapping	0	3.15914	3.05005	3.70908	4.06509	2.90199	2.87781	3.72286	3.67009	2.81669	3.28631	2.98174	3.02538	2.314	2.46876	2.02373	1.65553	2.1741	1.89046	2.39417	1.62267
Noc4l	5	110648418	110653417	-	2.48797e-05	Noc4l	ENSMUSG00000033294	nucleolar complex associated 4 homolog (S. cerevisiae) [Source:MGI Symbol;Acc:MGI:2140843]	gene	overlapping	0	8.99817	7.94775	8.5884	7.58465	7.99094	7.6275	8.04792	8.44372	7.9001	7.78941	7.49851	6.90953	6.78458	7.03918	7.4221	7.05242	7.55213	6.66078	7.2314	6.40112
Lgmn	12	102394084	102439813	-	0.000564804	Lgmn	ENSMUSG00000021190	legumain [Source:MGI Symbol;Acc:MGI:1330838]	gene	overlapping	0	8.43149	8.10171	8.21707	7.53208	8.46891	7.68466	8.19365	8.59456	7.87145	8.39395	6.25611	6.92154	7.33691	7.46123	7.48027	7.37069	6.2079	7.13471	7.38901	7.05638
Rabgef1	5	130171798	130214342	+	0.0467477	Rabgef1	ENSMUSG00000025340	RAB guanine nucleotide exchange factor (GEF) 1 [Source:MGI Symbol;Acc:MGI:1929459]	gene	overlapping	0	6.2806	7.15558	7.00404	7.22478	7.47743	6.94703	7.39242	7.01099	6.60096	6.12525	5.77792	5.66567	6.28063	5.35412	6.01842	6.53491	2.93082	6.36253	6.13217	5.97042
Fam134c	11	101096322	101119893	-	0.000306632	Fam134c	ENSMUSG00000017802	family with sequence similarity 134, member C [Source:MGI Symbol;Acc:MGI:1915248]	gene	overlapping	0	6.28508	5.82264	6.74861	6.05042	6.5907	6.28671	6.715	6.19734	6.58927	5.87466	5.4305	5.02983	5.76058	4.57806	5.7209	4.71442	5.52557	5.16509	4.38901	5.74046
1810031K17Rik	1	75134554	75142368	-	0.00345427	1810031K17Rik	ENSMUSG00000033159	RIKEN cDNA 1810031K17 gene [Source:MGI Symbol;Acc:MGI:1916421]	gene	overlapping	0	8.57082	7.30519	8.06184	7.39367	7.92085	7.03444	7.33544	8.03178	7.19034	7.15616	6.05306	6.69815	7.09855	6.59039	6.89337	6.80934	6.0909	6.54729	7.02561	5.6695
Pla2g15	8	106150399	106164713	+	1.4204e-05	Pla2g15	ENSMUSG00000031903	phospholipase A2, group XV [Source:MGI Symbol;Acc:MGI:2178076]	gene	overlapping	0	8.34308	7.56312	8.46726	8.25799	8.59609	7.98694	8.43212	8.3475	8.31108	7.9212	7.80296	6.69536	7.243	7.04591	7.5574	7.46031	7.19263	6.00236	7.29003	6.69592
Mrpl27	11	94653767	94660089	+	0.00106319	Mrpl27	ENSMUSG00000024414	mitochondrial ribosomal protein L27 [Source:MGI Symbol;Acc:MGI:2137224]	gene	overlapping	0	5.80767	6.54037	6.35507	5.98801	5.65407	5.87781	5.98938	6.72218	6.19476	6.45172	5.28799	5.35795	4.39939	4.74178	5.32428	4.77655	4.22301	5.07582	5.46211	5.79705
Gnl2	4	125016585	125055380	+	2.14575e-06	Gnl2	ENSMUSG00000028869	guanine nucleotide binding protein-like 2 (nucleolar) [Source:MGI Symbol;Acc:MGI:2385207]	gene	overlapping	0	9.1007	8.21328	8.45204	7.93766	8.45173	8.08347	8.68848	8.48651	8.00054	7.91793	7.77229	6.66138	7.00901	7.22661	7.69616	7.56722	7.29911	6.68948	7.38123	7.24473
Ccdc97	7	25711106	25719088	-	0.0139817	Ccdc97	ENSMUSG00000002608	coiled-coil domain containing 97 [Source:MGI Symbol;Acc:MGI:1196455]	gene	overlapping	0	5.97206	5.49062	6.06619	5.61345	5.46142	5.86726	5.72808	5.58825	6.32322	5.66404	4.60518	4.38597	4.6075	3.17331	3.55098	5.19572	4.87836	5.08601	5.52228	4.76563
Taf1b	12	24498581	24558571	+	0.00113879	Taf1b	ENSMUSG00000059669	TATA box binding protein (Tbp)-associated factor, RNA polymerase I, B [Source:MGI Symbol;Acc:MGI:109577]	gene	overlapping	0	8.01578	6.84261	7.97933	6.84842	7.57193	7.20323	7.63532	7.63791	7.414	7.31647	6.70598	6.42531	5.18526	5.83541	6.28056	7.17176	6.3956	5.87291	6.65828	6.69115
Psmd2	16	20651652	20663414	+	0.0076976	Psmd2	ENSMUSG00000006998	proteasome (prosome, macropain) 26S subunit, non-ATPase, 2 [Source:MGI Symbol;Acc:MGI:1096584]	gene	overlapping	0	9.09816	6.96834	8.47055	7.81967	7.73266	8.04228	8.30695	8.00364	7.86454	6.87803	7.97564	6.74352	6.12386	6.23154	6.81278	7.07507	7.48228	6.11369	7.2557	6.65854
Fam98a	17	75537086	75551946	-	2.09515e-08	Fam98a	ENSMUSG00000002017	family with sequence similarity 98, member A [Source:MGI Symbol;Acc:MGI:1919972]	gene	overlapping	0	7.55702	7.96607	7.70126	7.3945	7.54787	6.96197	7.79673	7.80904	7.58844	6.92284	7.14733	6.29471	6.3118	6.67243	6.09361	6.85324	6.2819	6.23548	6.42602	6.03959
Fam48a	3	54693105	54716837	+	0.0443749	Fam48a	ENSMUSG00000027751	family with sequence similarity 48, member A [Source:MGI Symbol;Acc:MGI:1929651]	gene	overlapping	0	6.73759	6.17737	6.27311	6.38367	6.93793	6.68416	7.48624	5.65945	5.99675	4.79478	5.51376	4.46689	4.32277	4.85343	5.55832	6.19158	5.57821	4.48316	6.03473	5.47234
Prpf31	7	3629985	3642486	+	0.000504108	Prpf31	ENSMUSG00000008373	PRP31 pre-mRNA processing factor 31 homolog (yeast) [Source:MGI Symbol;Acc:MGI:1916238]	gene	overlapping	0	7.58993	6.23893	6.73117	6.80912	6.69664	7.52334	6.99804	7.40121	6.72663	6.60824	5.88603	5.97324	5.13635	5.74454	6.4657	6.08849	6.07434	6.10869	5.89788	5.16011
CT009632.1	16	97490047	97491120	+	0.00817527	CT009632.1	ENSMUSG00000096156	No description	gene	overlapping	0	4.44154	4.24269	4.80386	3.93424	3.68381	4.50419	4.82379	3.44061	4.57411	3.72153	4.14733	3.16126	3.36584	3.58424	3.37921	2.91857	2.36051	2.06555	3.18375	2.68157
Cdk5rap1	2	154335380	154373010	-	0.0275086	Cdk5rap1	ENSMUSG00000027487	CDK5 regulatory subunit associated protein 1 [Source:MGI Symbol;Acc:MGI:1914221]	gene	overlapping	0	6.15426	5.50948	6.56152	5.95689	5.84718	5.80969	4.56854	6.11011	5.45411	5.93423	5.85975	4.31489	4.6075	3.94269	3.2582	4.64346	3.85527	4.89046	5.60028	4.87481
Lrrc57	2	120604238	120609520	-	0.0310704	Lrrc57	ENSMUSG00000027286	leucine rich repeat containing 57 [Source:MGI Symbol;Acc:MGI:1913856]	gene	overlapping	0	7.00497	7.58403	7.36782	6.62905	6.72374	7.06936	7.06349	7.27088	6.76125	7.03743	6.57642	4.7079	5.83909	5.13594	5.18419	6.37982	3.90108	7.0037	6.29003	6.30606
Grwd1	7	45825227	45830944	-	6.2898e-06	Grwd1	ENSMUSG00000053801	glutamate-rich WD repeat containing 1 [Source:MGI Symbol;Acc:MGI:2141989]	gene	overlapping	0	9.28116	8.37198	8.69397	8.07806	8.65077	7.90856	8.92552	8.83589	8.20299	7.98597	8.20379	7.3903	7.21971	7.27612	7.81125	7.28197	7.64927	6.61399	7.44914	7.2001
Dhx8	11	101732919	101767358	+	1.24789e-05	Dhx8	ENSMUSG00000034931	DEAH (Asp-Glu-Ala-His) box polypeptide 8 [Source:MGI Symbol;Acc:MGI:1306823]	gene	overlapping	0	7.50236	8.02951	8.54228	7.53585	7.93406	7.68466	7.86345	8.44372	8.08377	7.83005	7.20692	6.75699	6.92942	5.92333	7.0277	7.52507	6.49353	6.49851	7.19044	6.73236
Gm15623	7	97650010	97696828	-	0.00239883	Gm15623	ENSMUSG00000086993	predicted gene 15623 [Source:MGI Symbol;Acc:MGI:3642179]	gene	overlapping	0	4.93837	3.78701	4.73555	3.80038	4.3545	3.87079	4.43452	4.76254	4.18813	4.07908	3.60518	3.24012	2.71133	2.54676	3.89046	3.44908	3.27031	2.32858	3.64859	3.09661
Ogfod1	8	94037198	94067921	+	0.00973512	Ogfod1	ENSMUSG00000033009	2-oxoglutarate and iron-dependent oxygenase domain containing 1 [Source:MGI Symbol;Acc:MGI:2442978]	gene	overlapping	0	7.13456	6.99758	7.85606	6.66801	7.40114	7.3768	7.38748	7.53973	6.79941	6.81252	5.3722	5.30392	6.63417	6.39335	6.93627	5.71442	6.40092	6.58193	6.07385	4.33539
Nup62	7	44816088	44830809	+	0.000165435	Nup62	ENSMUSG00000043858	nucleoporin 62 [Source:MGI Symbol;Acc:MGI:1351500]	gene	overlapping	0	8.31273	7.27244	7.77862	7.09704	8.05423	7.63632	7.73458	7.7675	7.48055	6.7439	6.78631	6.34553	6.05711	6.65345	7.13717	6.81203	6.55213	5.77232	6.78354	6.03959
Klf17	4	117757836	117765648	-	0.0228519	Klf17	ENSMUSG00000048626	Kruppel-like factor 17 [Source:MGI Symbol;Acc:MGI:2181068]	gene	overlapping	0	8.72365	8.20076	8.88591	8.30774	9.03921	8.11278	9.10969	8.58122	7.79651	7.44491	8.15815	7.63024	8.01511	7.69115	7.71927	5.37435	5.70413	7.58732	7.20005	6.65732
Cenpq	17	40923051	40935047	-	0.0264276	Cenpq	ENSMUSG00000023919	centromere protein Q [Source:MGI Symbol;Acc:MGI:1933744]	gene	overlapping	0	6.40501	7.29617	6.89083	6.39533	6.50997	6.47555	7.47232	7.18811	5.85063	6.75127	6.37962	6.5864	5.39524	4.95705	5.412	5.87792	3.40358	5.91068	5.97052	4.90396
Pdpn	4	143267431	143299564	-	0.0273804	Pdpn	ENSMUSG00000028583	podoplanin [Source:MGI Symbol;Acc:MGI:103098]	gene	overlapping	0	5.20707	5.23516	4.75293	5.35838	4.39103	4.08613	5.42169	5.24797	5.06822	5.16999	4.19856	2.56817	3.26023	5.15267	3.53618	3.8361	4.00262	3.12609	4.43982	3.56127
[truncated: 218 more rows]
