# Supplementary material for: G9a regulates temporal preimplantation developmental program and lineage segregation in blastocyst
Source: eLife journal article supplement (doi:10.7554/elife.33361), 2018-05-10
Supplement: supp [file elife-33361-supp-v1.zip › elife_poa_e33361_Figure_3_source_data_3.xlsx]

## Sheet: DOWNGOterm
Figure 3-source data 3. List of enriched GO terms in genes upregulated or downregulated in 8C Ehmt2Mat embryos. GO term enrichment for biological processes was calculated using DAVID software with minimum 5 genes in a category and EASE p-value<0.05
Downregulated genes					Upregulated genes
TERM	Gene Count	% of Query	P-Value		TERM	Gene Count	% of Query	P-Value
chromatin silencing	20	2.5	1.1E-12		rRNA processing	36	6.0	4.8E-25
cell cycle	56	7.0	3.9E-9		ribosome biogenesis	30	5.0	3.8E-23
cell division	37	4.6	3.7E-7		mRNA processing	45	7.5	4.9E-18
negative regulation of transcription from RNA polymerase II promoter	56	7.0	1.2E-6		RNA splicing	36	6.0	2.5E-15
transcription, DNA-templated	105	13.1	6.8E-5		maturation of SSU-rRNA from tricistronic rRNA transcript (SSU-rRNA, 5.8S rRNA, LSU-rRNA)	12	2.0	1.4E-10
Wnt signaling pathway	22	2.8	6.9E-5		mRNA splicing, via spliceosome	19	3.2	3.0E-9
protein K48-linked ubiquitination	10	1.3	7.2E-5		RNA processing	15	2.5	1.7E-8
stem cell population maintenance	12	1.5	7.3E-5		mitotic nuclear division	27	4.5	1.3E-7
regulation of transcription, DNA-templated	121	15.1	1.3E-4		RNA secondary structure unwinding	11	1.8	4.5E-7
regulation of translation	15	1.9	2.1E-4		mRNA transport	14	2.3	1.3E-6
covalent chromatin modification	24	3.0	2.4E-4		cell division	29	4.8	4.1E-6
mitotic nuclear division	24	3.0	4.2E-4		cell cycle	39	6.5	7.9E-6
apoptotic process	39	4.9	6.5E-4		mRNA export from nucleus	9	1.5	1.0E-5
neural tube closure	12	1.5	1.2E-3		blastocyst development	8	1.3	1.4E-5
regulation of cell cycle	13	1.6	1.2E-3		transcription, DNA-templated	85	14.2	2.8E-5
small GTPase mediated signal transduction	20	2.5	1.9E-3		DNA replication initiation	7	1.2	4.7E-5
protein transport	38	4.8	2.4E-3		DNA replication	14	2.3	5.3E-5
labyrinthine layer blood vessel development	6	0.8	2.7E-3		maturation of SSU-rRNA	6	1.0	6.4E-5
actin cytoskeleton organization	14	1.8	3.1E-3		protein import into nucleus	9	1.5	4.2E-4
vesicle-mediated transport	18	2.3	3.4E-3		poly(A)+ mRNA export from nucleus	5	0.8	5.3E-4
negative regulation of cell proliferation	27	3.4	3.6E-3		maturation of 5.8S rRNA	5	0.8	5.3E-4
regulation of transcription from RNA polymerase II promoter	27	3.4	5.6E-3		negative regulation of mRNA splicing, via spliceosome	6	1.0	6.3E-4
cellular response to hypoxia	11	1.4	6.0E-3		translational initiation	8	1.3	8.5E-4
cell migration	16	2.0	6.6E-3		transcription initiation from RNA polymerase I promoter	5	0.8	9.3E-4
liver development	10	1.3	1.0E-2		ribosomal small subunit biogenesis	5	0.8	1.8E-3
focal adhesion assembly	5	0.6	1.0E-2		positive regulation of telomere maintenance via telomerase	6	1.0	2.0E-3
positive regulation of protein phosphorylation	15	1.9	1.1E-2		purine nucleotide biosynthetic process	5	0.8	2.3E-3
negative regulation of NF-kappaB transcription factor activity	8	1.0	1.3E-2		regulation of translational initiation	6	1.0	2.3E-3
cell-cell adhesion	15	1.9	1.4E-2		mitotic metaphase plate congression	6	1.0	2.7E-3
protein K63-linked ubiquitination	6	0.8	1.4E-2		transcription elongation from RNA polymerase II promoter	5	0.8	3.3E-3
gene silencing by RNA	7	0.9	1.5E-2		protein transport	30	5.0	3.7E-3
intracellular protein transport	17	2.1	1.7E-2		ribosomal large subunit biogenesis	5	0.8	4.5E-3
embryonic organ development	6	0.8	1.7E-2		cell proliferation	15	2.5	4.7E-3
positive regulation of transcription from RNA polymerase II promoter	52	6.5	2.0E-2		formation of translation preinitiation complex	5	0.8	5.3E-3
canonical Wnt signaling pathway	9	1.1	2.0E-2		regulation of transcription from RNA polymerase II promoter	21	3.5	1.1E-2
positive regulation of protein ubiquitination	7	0.9	2.6E-2		nuclear-transcribed mRNA catabolic process, nonsense-mediated decay	5	0.8	1.1E-2
proteasome-mediated ubiquitin-dependent protein catabolic process	12	1.5	2.8E-2		translation	21	3.5	1.2E-2
positive regulation of filopodium assembly	5	0.6	2.9E-2		regulation of transcription, DNA-templated	84	14.0	1.2E-2
intrinsic apoptotic signaling pathway by p53 class mediator	5	0.6	2.9E-2		negative regulation of apoptotic process	27	4.5	1.3E-2
Golgi organization	8	1.0	3.1E-2		chromosome segregation	8	1.3	1.4E-2
endosome organization	5	0.6	3.2E-2		stem cell population maintenance	7	1.2	1.6E-2
negative regulation of transcription, DNA-templated	32	4.0	3.7E-2		negative regulation of cell differentiation	9	1.5	1.7E-2
positive regulation of actin filament polymerization	6	0.8	3.8E-2		chromatin silencing at rDNA	6	1.0	2.0E-2
actin filament organization	8	1.0	3.9E-2		transcription initiation from RNA polymerase II promoter	5	0.8	2.1E-2
protein ubiquitination	22	2.8	3.9E-2		response to starvation	5	0.8	2.3E-2
stem cell differentiation	5	0.6	3.9E-2		response to heat	6	1.0	2.4E-2
regulation of protein localization	7	0.9	4.0E-2		methylation	11	1.8	2.4E-2
multicellular organism growth	10	1.3	4.0E-2		regulation of alternative mRNA splicing, via spliceosome	5	0.8	2.5E-2
regulation of cell shape	11	1.4	4.0E-2		positive regulation of protein targeting to mitochondrion	7	1.2	2.7E-2
angiogenesis	16	2.0	4.2E-2		circadian regulation of gene expression	6	1.0	3.0E-2
protein polyubiquitination	9	1.1	4.3E-2		protein folding	9	1.5	3.1E-2
insulin receptor signaling pathway	6	0.8	4.4E-2		G1/S transition of mitotic cell cycle	6	1.0	3.2E-2
positive regulation of neuron apoptotic process	7	0.9	4.8E-2		intracellular protein transport	13	2.2	3.6E-2
					positive regulation of cell growth	7	1.2	4.5E-2
					Ras protein signal transduction	5	0.8	4.5E-2

## Sheet: UPGOterm
Sublist	Category	Term	RT	Genes	Count	%	P-Value	Benjamini		min 0.05 EASE		GOTERM_BP_DIRECT	transcription, DNA-templated				GOTERM_BP_DIRECT	blastocyst development					Kegg_PATHWAY
	GOTERM_BP_DIRECT	rRNA processing	RT		36	6.0	4.8E-25	8.9E-22		min 5 genes		ENSMUSG00000024045	A kinase (PRKA) anchor protein 8(Akap8)	RG	Mus musculus		ENSEMBL_GENE_ID	GENE NAME	Related Genes	Species		Sublist	Category	Term	RT	Genes	Count	%	P-Value	Benjamini				Term	P-Value
	GOTERM_BP_DIRECT	ribosome biogenesis	RT		30	5.0	3.8E-23	3.5E-20				ENSMUSG00000024081	CCAAT/enhancer binding protein zeta(Cebpz)	RG	Mus musculus		ENSMUSG00000011958	BCL2/adenovirus E1B interacting protein 2(Bnip2)	RG	Mus musculus			KEGG_PATHWAY	Ribosome biogenesis in eukaryotes	RT		24	4.0	2.4E-16	4.2E-14				blastocyst development	1.4e-05
	GOTERM_BP_DIRECT	mRNA processing	RT		45	7.5	4.9E-18	3.0E-15				ENSMUSG00000056167	CCR4-NOT transcription complex, subunit 10(Cnot10)	RG	Mus musculus		ENSMUSG00000035293	G2/M-phase specific E3 ubiquitin ligase(G2e3)	RG	Mus musculus			KEGG_PATHWAY	Spliceosome	RT		26	4.3	2.2E-13	2.1E-11				mRNA export from nucleus	1e-05
	GOTERM_BP_DIRECT	RNA splicing	RT		36	6.0	2.5E-15	1.2E-12				ENSMUSG00000026174	CCR4-NOT transcription complex, subunit 9(Cnot9)	RG	Mus musculus		ENSMUSG00000028109	HORMA domain containing 1(Hormad1)	RG	Mus musculus			KEGG_PATHWAY	RNA transport	RT		24	4.0	2.1E-9	1.3E-7				cell cycle	7.9e-06
	GOTERM_BP_DIRECT	maturation of SSU-rRNA from tricistronic rRNA transcript (SSU-rRNA, 5.8S rRNA, LSU-rRNA)	RT		12	2.0	1.4E-10	5.0E-8				ENSMUSG00000055041	COMM domain containing 5(Commd5)	RG	Mus musculus		ENSMUSG00000026622	NIMA (never in mitosis gene a)-related expressed kinase 2(Nek2)	RG	Mus musculus			KEGG_PATHWAY	Cell cycle	RT		14	2.3	1.2E-4	5.5E-3				cell division	4.1e-06
	GOTERM_BP_DIRECT	mRNA splicing, via spliceosome	RT		19	3.2	3.0E-9	9.3E-7				ENSMUSG00000020075	DEAD (Asp-Glu-Ala-Asp) box polypeptide 21(Ddx21)	RG	Mus musculus		ENSMUSG00000019470	XPA binding protein 2(Xab2)	RG	Mus musculus			KEGG_PATHWAY	Lysosome	RT		10	1.7	1.4E-2	4.0E-1				mRNA transport	1.3e-06
	GOTERM_BP_DIRECT	RNA processing	RT		15	2.5	1.7E-8	4.4E-6				ENSMUSG00000029599	DEAD (Asp-Glu-Ala-Asp) box polypeptide 54(Ddx54)	RG	Mus musculus		ENSMUSG00000029062	cyclin-dependent kinase 11B(Cdk11b)	RG	Mus musculus			KEGG_PATHWAY	Alanine, aspartate and glutamate metabolism	RT		5	0.8	2.7E-2	5.7E-1				RNA secondary structure unwinding	4.5e-07
	GOTERM_BP_DIRECT	mitotic nuclear division	RT		27	4.5	1.3E-7	2.9E-5				ENSMUSG00000028610	DMRT-like family B with proline-rich C-terminal, 1(Dmrtb1)	RG	Mus musculus		ENSMUSG00000022174	defender against cell death 1(Dad1)	RG	Mus musculus			KEGG_PATHWAY	mRNA surveillance pathway	RT		8	1.3	2.9E-2	5.5E-1				mitotic nuclear division	1.3e-07
	GOTERM_BP_DIRECT	RNA secondary structure unwinding	RT		11	1.8	4.5E-7	9.2E-5				ENSMUSG00000037174	E74-like factor 2(Elf2)	RG	Mus musculus		ENSMUSG00000028693	nuclear autoantigenic sperm protein (histone-binding)(Nasp)	RG	Mus musculus			KEGG_PATHWAY	Biosynthesis of antibiotics	RT		13	2.2	3.5E-2	5.6E-1				RNA processing	1.7e-08
	GOTERM_BP_DIRECT	mRNA transport	RT		14	2.3	1.3E-6	2.4E-4				ENSMUSG00000021944	GATA binding protein 4(Gata4)	RG	Mus musculus								KEGG_PATHWAY	RNA degradation	RT		7	1.2	4.2E-2	5.9E-1				mRNA splicing, via spliceosome	3e-09
	GOTERM_BP_DIRECT	cell division	RT		29	4.8	4.1E-6	6.8E-4				ENSMUSG00000024926	K(lysine) acetyltransferase 5(Kat5)	RG	Mus musculus								KEGG_PATHWAY	Antigen processing and presentation	RT		7	1.2	4.2E-2	5.9E-1				maturation of SSU-rRNA from tricistronic rRNA transcript (SSU-rRNA, 5.8S rRNA, LSU-rRNA)	1.4e-10
	GOTERM_BP_DIRECT	cell cycle	RT		39	6.5	7.9E-6	1.2E-3				ENSMUSG00000035397	Kruppel-like factor 16(Klf16)	RG	Mus musculus								KEGG_PATHWAY	Metabolic pathways	RT		51	8.5	4.5E-2	5.8E-1				RNA splicing	2.5e-15
	GOTERM_BP_DIRECT	mRNA export from nucleus	RT		9	1.5	1.0E-5	1.4E-3				ENSMUSG00000048626	Kruppel-like factor 17(Klf17)	RG	Mus musculus																			mRNA processing	4.9e-18
	GOTERM_BP_DIRECT	blastocyst development	RT		8	1.3	1.4E-5	1.8E-3				ENSMUSG00000042487	Leo1, Paf1/RNA polymerase II complex component(Leo1)	RG	Mus musculus																			ribosome biogenesis	3.8e-23
	GOTERM_BP_DIRECT	transcription, DNA-templated	RT		85	14.2	2.8E-5	3.4E-3				ENSMUSG00000040463	MYB binding protein (P160) 1a(Mybbp1a)	RG	Mus musculus																			rRNA processing	4.8e-25
	GOTERM_BP_DIRECT	DNA replication initiation	RT		7	1.2	4.7E-5	5.4E-3				ENSMUSG00000003437	Paf1, RNA polymerase II complex component(Paf1)	RG	Mus musculus
	GOTERM_BP_DIRECT	DNA replication	RT		14	2.3	5.3E-5	5.8E-3				ENSMUSG00000022682	RRN3 RNA polymerase I transcription factor homolog (yeast)(Rrn3)	RG	Mus musculus
	GOTERM_BP_DIRECT	maturation of SSU-rRNA	RT		6	1.0	6.4E-5	6.5E-3				ENSMUSG00000020755	SAP30 binding protein(Sap30bp)	RG	Mus musculus																					Sublist
	GOTERM_BP_DIRECT	protein import into nucleus	RT		9	1.5	4.2E-4	4.0E-2				ENSMUSG00000032187	SWI/SNF related, matrix associated, actin dependent regulator of chromatin, subfamily a, member 4(Smarca4)	RG	Mus musculus
	GOTERM_BP_DIRECT	poly(A)+ mRNA export from nucleus	RT		5	0.8	5.3E-4	4.8E-2				ENSMUSG00000028899	TATA-box binding protein associated factor 12(Taf12)	RG	Mus musculus
	GOTERM_BP_DIRECT	maturation of 5.8S rRNA	RT		5	0.8	5.3E-4	4.8E-2				ENSMUSG00000051316	TATA-box binding protein associated factor 7(Taf7)	RG	Mus musculus
	GOTERM_BP_DIRECT	negative regulation of mRNA splicing, via spliceosome	RT		6	1.0	6.3E-4	5.4E-2				ENSMUSG00000072258	TATA-box binding protein associated factor, RNA polymerase I, A(Taf1a)	RG	Mus musculus
	GOTERM_BP_DIRECT	translational initiation	RT		8	1.3	8.5E-4	6.9E-2				ENSMUSG00000059669	TATA-box binding protein associated factor, RNA polymerase I, B(Taf1b)	RG	Mus musculus
	GOTERM_BP_DIRECT	transcription initiation from RNA polymerase I promoter	RT		5	0.8	9.3E-4	7.2E-2				ENSMUSG00000031939	TATA-box binding protein associated factor, RNA polymerase I, D(Taf1d)	RG	Mus musculus
	GOTERM_BP_DIRECT	ribosomal small subunit biogenesis	RT		5	0.8	1.8E-3	1.3E-1				ENSMUSG00000006335	TCF3 (E2A) fusion partner(Tfpt)	RG	Mus musculus
	GOTERM_BP_DIRECT	positive regulation of telomere maintenance via telomerase	RT		6	1.0	2.0E-3	1.4E-1				ENSMUSG00000030353	TEA domain family member 4(Tead4)	RG	Mus musculus
	GOTERM_BP_DIRECT	purine nucleotide biosynthetic process	RT		5	0.8	2.3E-3	1.5E-1				ENSMUSG00000037214	THAP domain containing, apoptosis associated protein 1(Thap1)	RG	Mus musculus
	GOTERM_BP_DIRECT	regulation of translational initiation	RT		6	1.0	2.3E-3	1.5E-1				ENSMUSG00000019470	XPA binding protein 2(Xab2)	RG	Mus musculus
	GOTERM_BP_DIRECT	mitotic metaphase plate congression	RT		6	1.0	2.7E-3	1.6E-1				ENSMUSG00000020412	activating signal cointegrator 1 complex subunit 2(Ascc2)	RG	Mus musculus
	GOTERM_BP_DIRECT	transcription elongation from RNA polymerase II promoter	RT		5	0.8	3.3E-3	1.9E-1				ENSMUSG00000036376	activator of basal transcription 1(Abt1)	RG	Mus musculus
	GOTERM_BP_DIRECT	protein transport	RT		30	5.0	3.7E-3	2.0E-1				ENSMUSG00000080268	breast cancer metastasis-suppressor 1(Brms1)	RG	Mus musculus
	GOTERM_BP_DIRECT	ribosomal large subunit biogenesis	RT		5	0.8	4.5E-3	2.4E-1				ENSMUSG00000024335	bromodomain containing 2(Brd2)	RG	Mus musculus
	GOTERM_BP_DIRECT	cell proliferation	RT		15	2.5	4.7E-3	2.4E-1				ENSMUSG00000000743	charged multivesicular body protein 1A(Chmp1a)	RG	Mus musculus
	GOTERM_BP_DIRECT	formation of translation preinitiation complex	RT		5	0.8	5.3E-3	2.5E-1				ENSMUSG00000090258	churchill domain containing 1(Churc1)	RG	Mus musculus
	GOTERM_BP_DIRECT	regulation of transcription from RNA polymerase II promoter	RT		21	3.5	1.1E-2	4.5E-1				ENSMUSG00000041777	corepressor interacting with RBPJ, 1(Cir1)	RG	Mus musculus
	GOTERM_BP_DIRECT	nuclear-transcribed mRNA catabolic process, nonsense-mediated decay	RT		5	0.8	1.1E-2	4.5E-1				ENSMUSG00000039756	deoxynucleotidyltransferase, terminal, interacting protein 2(Dnttip2)	RG	Mus musculus
	GOTERM_BP_DIRECT	translation	RT		21	3.5	1.2E-2	4.7E-1				ENSMUSG00000072419	developmental pluripotency associated 2(Dppa2)	RG	Mus musculus
	GOTERM_BP_DIRECT	regulation of transcription, DNA-templated	RT		84	14.0	1.2E-2	4.6E-1				ENSMUSG00000024271	elongator acetyltransferase complex subunit 2(Elp2)	RG	Mus musculus
	GOTERM_BP_DIRECT	negative regulation of apoptotic process	RT		27	4.5	1.3E-2	4.7E-1				ENSMUSG00000055762	eukaryotic translation elongation factor 1 delta (guanine nucleotide exchange protein)(Eef1d)	RG	Mus musculus
	GOTERM_BP_DIRECT	chromosome segregation	RT		8	1.3	1.4E-2	4.9E-1				ENSMUSG00000024382	excision repair cross-complementing rodent repair deficiency, complementation group 3(Ercc3)	RG	Mus musculus
	GOTERM_BP_DIRECT	stem cell population maintenance	RT		7	1.2	1.6E-2	5.3E-1				ENSMUSG00000002658	general transcription factor IIF, polypeptide 1(Gtf2f1)	RG	Mus musculus
	GOTERM_BP_DIRECT	negative regulation of cell differentiation	RT		9	1.5	1.7E-2	5.4E-1				ENSMUSG00000032777	general transcription factor III C 1(Gtf3c1)	RG	Mus musculus
	GOTERM_BP_DIRECT	chromatin silencing at rDNA	RT		6	1.0	2.0E-2	6.0E-1				ENSMUSG00000021362	glial cells missing homolog 2 (Drosophila)(Gcm2)	RG	Mus musculus
	GOTERM_BP_DIRECT	transcription initiation from RNA polymerase II promoter	RT		5	0.8	2.1E-2	6.0E-1				ENSMUSG00000002833	hepatoma-derived growth factor, related protein 2(Hdgfrp2)	RG	Mus musculus
	GOTERM_BP_DIRECT	response to starvation	RT		5	0.8	2.3E-2	6.2E-1				ENSMUSG00000021546	heterogeneous nuclear ribonucleoprotein K(Hnrnpk)	RG	Mus musculus
	GOTERM_BP_DIRECT	response to heat	RT		6	1.0	2.4E-2	6.2E-1				ENSMUSG00000048878	hexamethylene bis-acetamide inducible 1(Hexim1)	RG	Mus musculus
	GOTERM_BP_DIRECT	methylation	RT		11	1.8	2.4E-2	6.2E-1				ENSMUSG00000002996	high mobility group box transcription factor 1(Hbp1)	RG	Mus musculus
	GOTERM_BP_DIRECT	regulation of alternative mRNA splicing, via spliceosome	RT		5	0.8	2.5E-2	6.3E-1				ENSMUSG00000032119	histone H4 transcription factor(Hinfp)	RG	Mus musculus
	GOTERM_BP_DIRECT	positive regulation of protein targeting to mitochondrion	RT		7	1.2	2.7E-2	6.5E-1				ENSMUSG00000028800	histone deacetylase 1(Hdac1)	RG	Mus musculus
	GOTERM_BP_DIRECT	circadian regulation of gene expression	RT		6	1.0	3.0E-2	6.9E-1				ENSMUSG00000001016	interleukin enhancer binding factor 2(Ilf2)	RG	Mus musculus
	GOTERM_BP_DIRECT	protein folding	RT		9	1.5	3.1E-2	6.9E-1				ENSMUSG00000056962	jumonji domain containing 6(Jmjd6)	RG	Mus musculus
	GOTERM_BP_DIRECT	G1/S transition of mitotic cell cycle	RT		6	1.0	3.2E-2	7.0E-1				ENSMUSG00000085793	lin-52 homolog (C. elegans)(Lin52)	RG	Mus musculus
	GOTERM_BP_DIRECT	intracellular protein transport	RT		13	2.2	3.6E-2	7.3E-1				ENSMUSG00000029475	lysine (K)-specific demethylase 2B(Kdm2b)	RG	Mus musculus
	GOTERM_BP_DIRECT	positive regulation of cell growth	RT		7	1.2	4.5E-2	8.0E-1				ENSMUSG00000066042	mediator complex subunit 18(Med18)	RG	Mus musculus
	GOTERM_BP_DIRECT	Ras protein signal transduction	RT		5	0.8	4.5E-2	7.9E-1				ENSMUSG00000020801	mediator complex subunit 31(Med31)	RG	Mus musculus
												ENSMUSG00000022109	mediator complex subunit 4(Med4)	RG	Mus musculus
												ENSMUSG00000002679	mediator complex subunit 6(Med6)	RG	Mus musculus
												ENSMUSG00000022724	myc induced nuclear antigen(Mina)	RG	Mus musculus
												ENSMUSG00000016253	negative elongation factor complex member C/D, Th1l(Nelfcd)	RG	Mus musculus
												ENSMUSG00000018433	nucleolar protein 11(Nol11)	RG	Mus musculus
												ENSMUSG00000026496	poly (ADP-ribose) polymerase family, member 1(Parp1)	RG	Mus musculus
												ENSMUSG00000002524	poly-U binding splicing factor 60(Puf60)	RG	Mus musculus
												ENSMUSG00000028318	polymerase (RNA) I polypeptide E(Polr1e)	RG	Mus musculus
												ENSMUSG00000028099	polymerase (RNA) III (DNA directed) polypeptide C(Polr3c)	RG	Mus musculus
												ENSMUSG00000023110	protein arginine N-methyltransferase 5(Prmt5)	RG	Mus musculus
												ENSMUSG00000039220	protein phosphatase 1, regulatory subunit 10(Ppp1r10)	RG	Mus musculus
												ENSMUSG00000001288	retinoic acid receptor, gamma(Rarg)	RG	Mus musculus
												ENSMUSG00000030888	ribosomal RNA processing 8, methyltransferase, homolog (yeast)(Rrp8)	RG	Mus musculus
												ENSMUSG00000071054	scaffold attachment factor B(Safb)	RG	Mus musculus
												ENSMUSG00000042625	scaffold attachment factor B2(Safb2)	RG	Mus musculus
												ENSMUSG00000024528	serum response factor binding protein 1(Srfbp1)	RG	Mus musculus
												ENSMUSG00000025138	sirtuin 7(Sirt7)	RG	Mus musculus
												ENSMUSG00000032398	small nuclear RNA activating complex, polypeptide 5(Snapc5)	RG	Mus musculus
												ENSMUSG00000003435	suppressor of Ty 5(Supt5)	RG	Mus musculus
												ENSMUSG00000053134	suppressor of Ty 7-like(Supt7l)	RG	Mus musculus
												ENSMUSG00000028640	transcription factor AP-2, gamma(Tfap2c)	RG	Mus musculus
												ENSMUSG00000026492	transcription factor B2, mitochondrial(Tfb2m)	RG	Mus musculus
												ENSMUSG00000009733	transcription factor CP2(Tfcp2)	RG	Mus musculus
												ENSMUSG00000005566	tripartite motif-containing 28(Trim28)	RG	Mus musculus
												ENSMUSG00000027387	zinc finger CCCH type containing 8(Zc3h8)	RG	Mus musculus
												ENSMUSG00000006215	zinc finger and BTB domain containing 17(Zbtb17)	RG	Mus musculus
												ENSMUSG00000058028	zinc finger and SCAN domain containing 5B(Zscan5b)	RG	Mus musculus
												ENSMUSG00000071291	zinc finger protein 58(Zfp58)	RG	Mus musculus
												ENSMUSG00000007216	zinc finger protein 775(Zfp775)	RG	Mus musculus
												ENSMUSG00000007817	zinc finger, MIZ-type containing 1(Zmiz1)	RG	Mus musculus
