# Supplementary figures and images for: G9a regulates temporal preimplantation developmental program and lineage segregation in blastocyst
Source: eLife journal article supplement (doi:10.7554/elife.33361), 2018-05-10

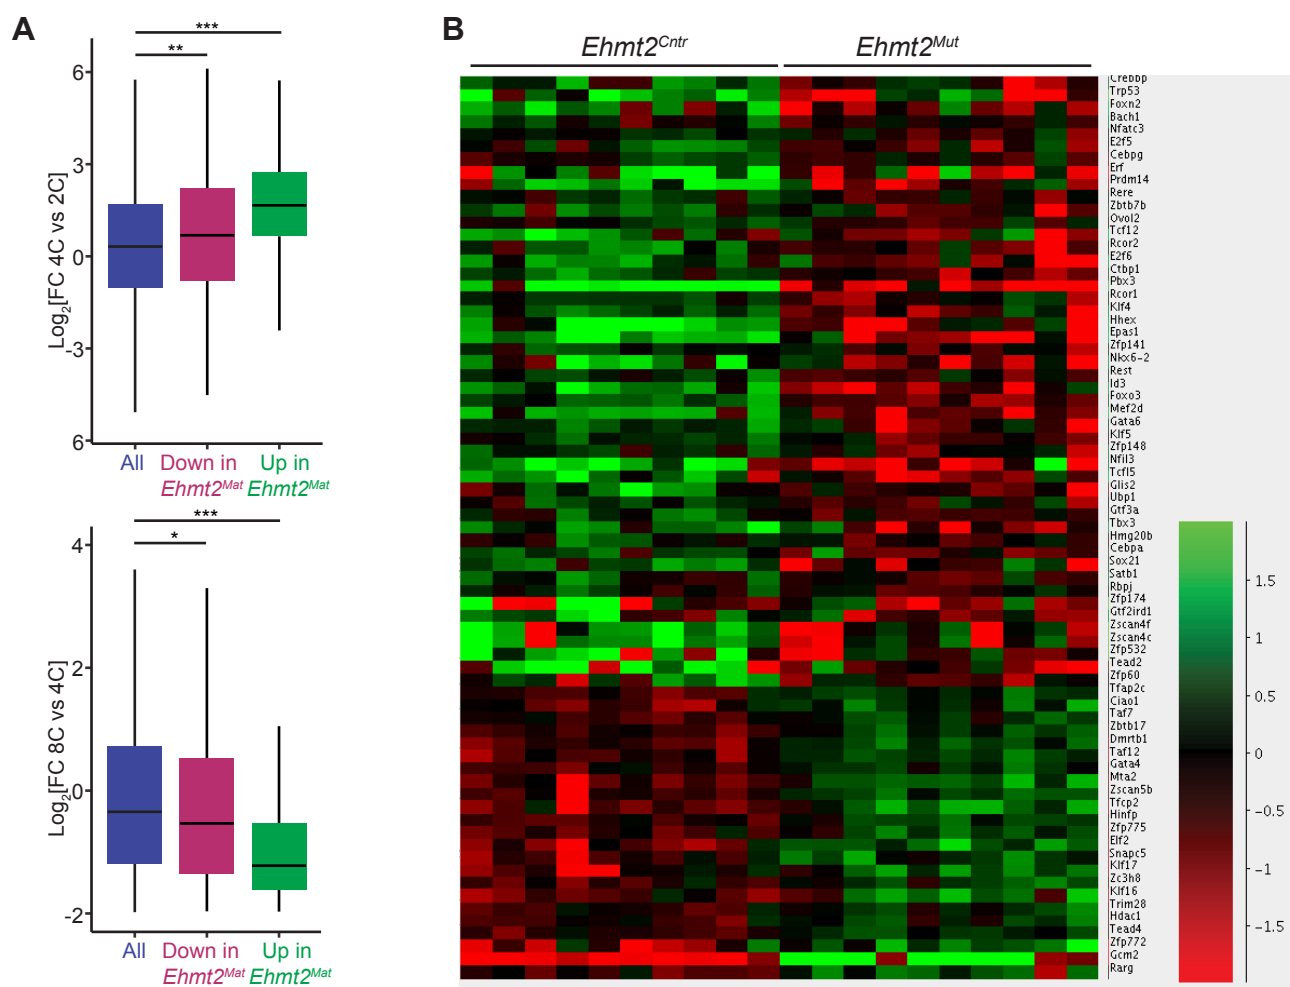

**Figure 3-figure supplement 2. G9a represses a subset of genes upregulated at 4-cell stage.**

Supplement: supp [file elife-33361-supp-v1.zip]

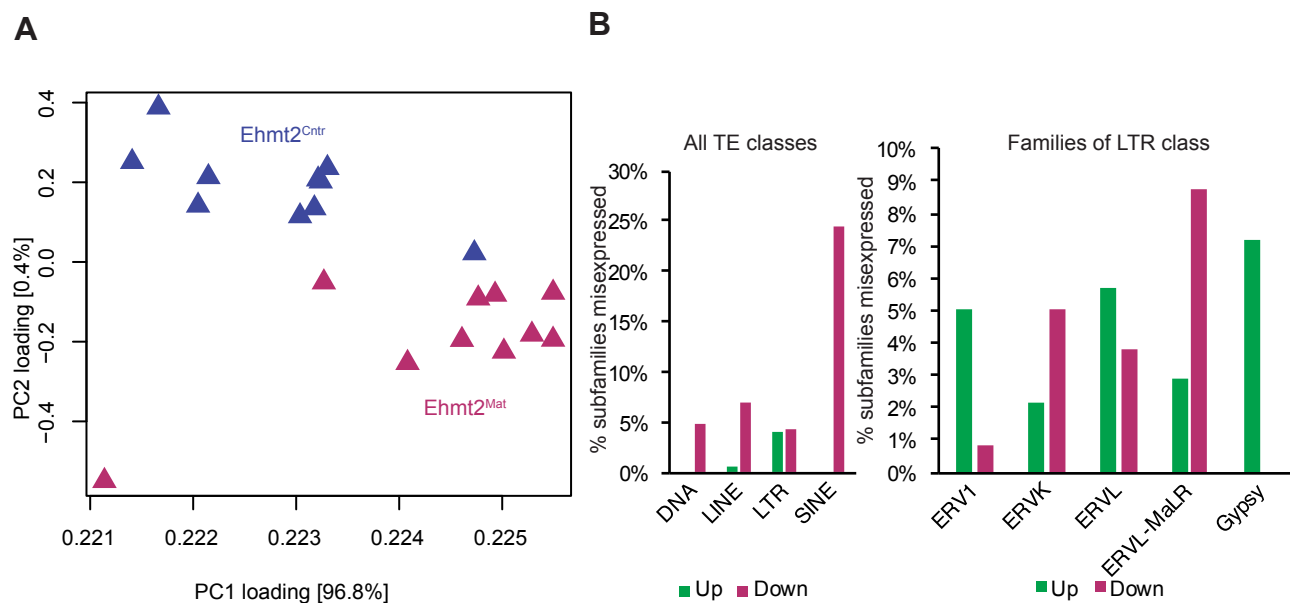

**Figure 3-figure supplement 3. Maternal G9a is dispensable for TE repression.**

Supplement: supp [file elife-33361-supp-v1.zip]

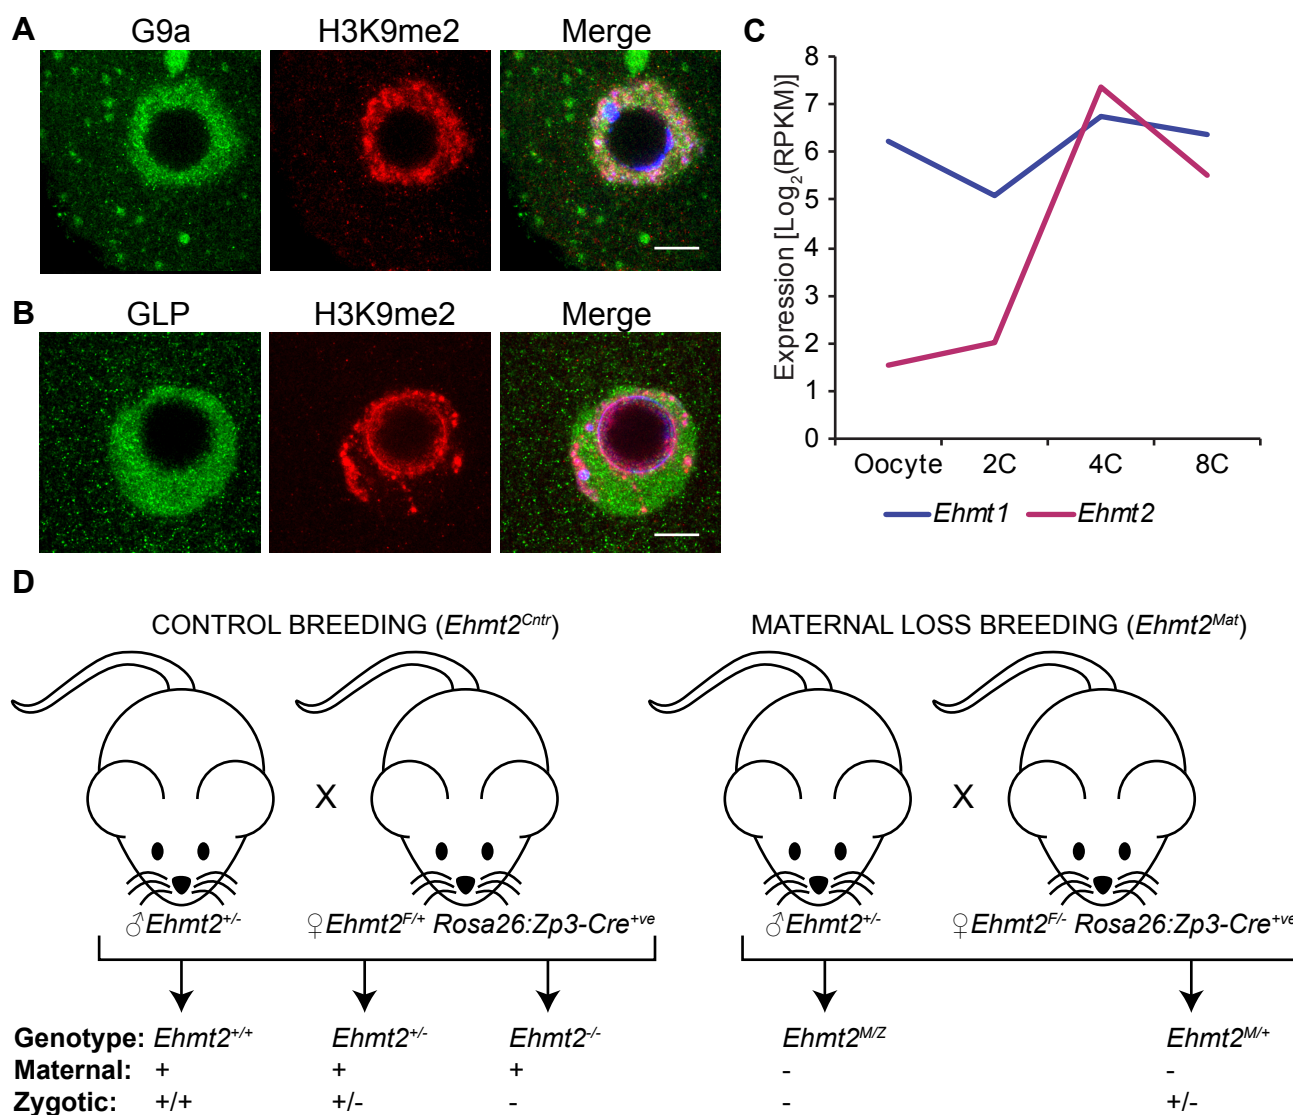

**Figure 1–Figure Supplement 2. Both G9a and GLP are maternally inherited.**

Supplement: supp [file elife-33361-supp-v1.zip]

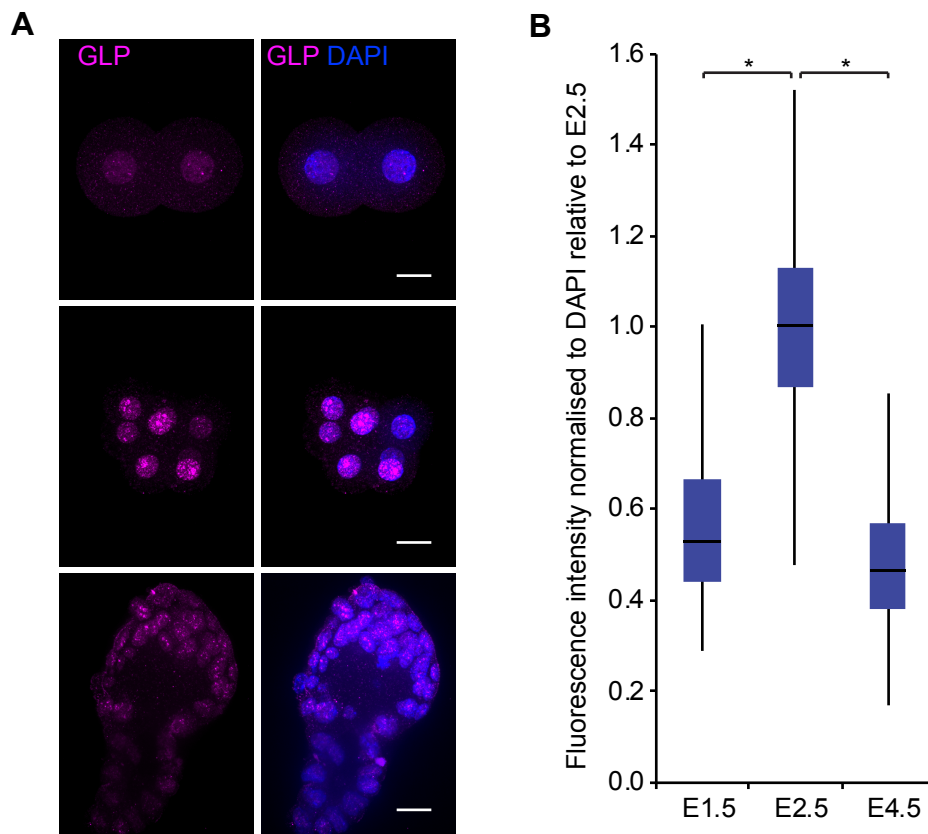

**Figure 1–Figure Supplement 1. GLP accumulates at 8C (E2.5) stage.**

Supplement: supp [file elife-33361-supp-v1.zip › elife_poa_e33361_Figure_1_figure_supplement_1.pdf]

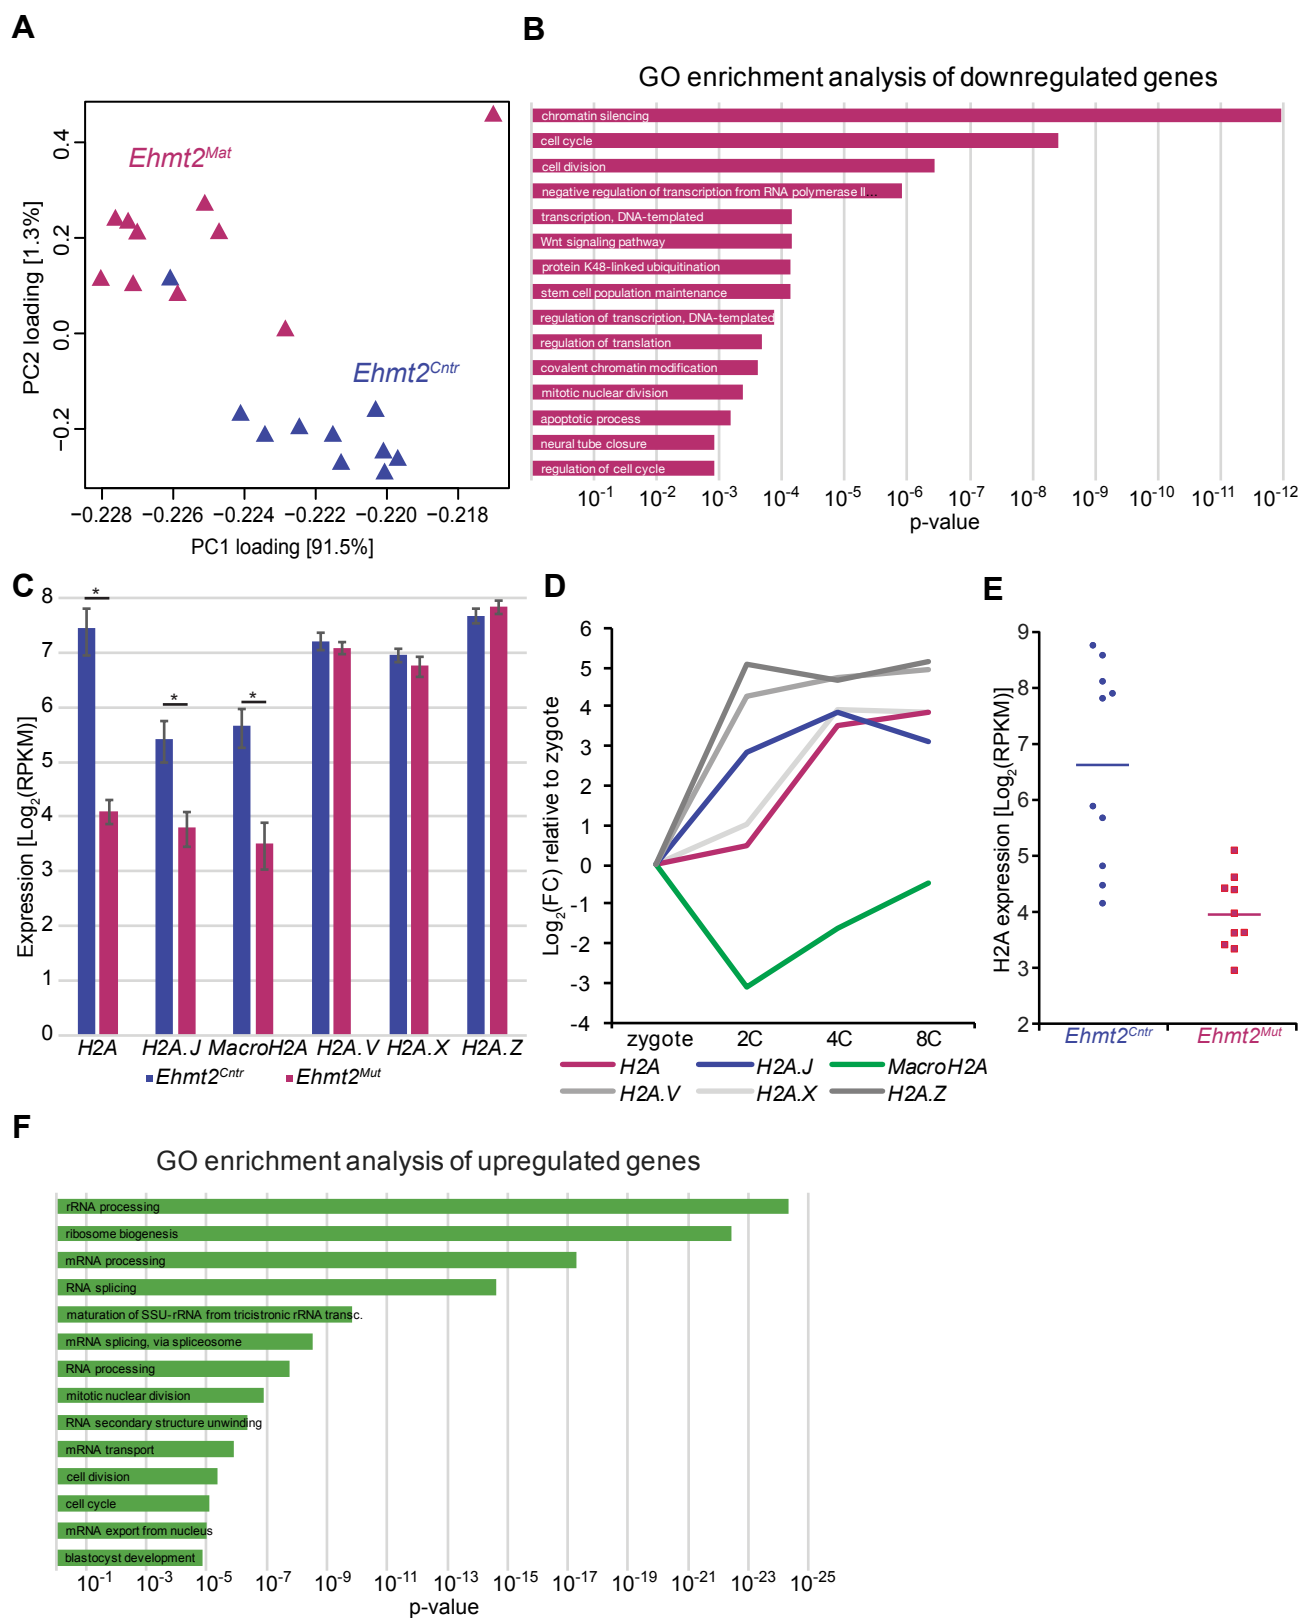

**Figure 3-figure supplement 1. G9a regulates transcription of specific gene sets.**

Supplement: supp [file elife-33361-supp-v1.zip › elife_poa_e33361_Figure_3_figure_supplement_1.pdf]
